# Supplementary material for: HtrA3: a promising prognostic biomarker and therapeutic target for head and neck squamous cell carcinoma
Source: PeerJ journal article supplement (doi:10.7717/peerj.16237), 2023-10-10
Supplement: Apoptosis.zip [file Apoptosis.zip]

## Sheet: Sheet1
Q1	Q2	Q3	Q4	Q1	Q2	Q3	Q4	Apoptotic	Live
2.21	8.74	17.1	72	221	874	1710	7195	25.84	72	FADU
3.14	10.8	14.4	71.7	314	1079	1440	7167	25.2	71.7
2.89	9.41	13.6	74.1	289	941	1361	7409	23.01	74.1
2.7	1.54	4.8	91	270	154	480	9096	6.34	91
3.28	1.83	4.64	90.2	328	183	464	9025	6.47	90.2
4.15	2.36	5.05	88.4	415	236	505	8844	7.41	88.4
3.26	12.2	15.9	68.6	326	1223	1593	6858	28.1	68.6	CAL-27
2.71	9.91	16.2	71.2	271	991	1623	7115	26.11	71.2
4.47	10.8	13.8	71	447	1081	1377	7095	24.6	71
3.82	2.22	5.06	88.9	382	222	506	8890	7.28	88.9
3.94	2.22	5.3	88.5	394	222	530	8854	7.52	88.5
3.91	1.8	4.15	90.1	391	180	415	9014	5.95	90.1
