# Supplementary material for: HtrA3: a promising prognostic biomarker and therapeutic target for head and neck squamous cell carcinoma
Source: PeerJ journal article supplement (doi:10.7717/peerj.16237), 2023-10-10
Supplement: cck8.zip [file cck8.zip]

## Sheet: Sheet1
			cal-27					fadu
	0H	1	2	3	4	5	6	7	8	9	10	11	12
	A	0.115	0.117	0.119	0.121	0.122	0.126	0.121	0.121	0.123	0.121	0.122	0.115
	B	0.122	0.126	0.114	0.113	0.118	0.118	0.114	0.115	0.116	0.113	0.118	0.12		0H	cal-27					fadu
	C	0.123	0.664	0.782	0.662	0.635	0.633	0.768	0.663	0.66	0.631	0.577	0.121		Control	0.5232	0.6412	0.5212	0.4942	0.4922	0.6272	0.5222	0.5192	0.4902	0.4362
	D	0.126	0.6183	0.509	0.609	0.525	0.612	0.658	0.688	0.689	0.664	0.66	0.122		shNC	0.4775	0.3682	0.4682	0.3842	0.4712	0.5172	0.5472	0.5482	0.5232	0.5192
	E	0.124	0.3625	0.5372	0.6352	0.4931	0.6062	0.5196	0.5356	0.5186	0.6676	0.5146	0.12		shHtrA3	0.2217	0.3964	0.4944	0.3523	0.4654	0.3788	0.3948	0.3778	0.5268	0.3738
	F	0.126	0.111	0.105	0.107	0.116	0.127	0.144	0.139	0.139	0.14	0.142	0.12	0.1408
	G	0.122	0.112	0.114	0.123	0.122	0.126	0.153	0.167	0.167	0.157	0.142	0.121
	H	0.112	0.12	0.122	0.124	0.125	0.03	0.133	0.147	0.168	0.184	0.112	0.142
	12H	1	2	3	4	5	6	7	8	9	10	11	12
	A	0.116	0.117	0.121	0.117	0.117	0.121	0.12	0.116	0.119	0.122	0.117	0.119
	B	0.121	0.116	0.117	0.116	0.112	0.127	0.134	0.158	0.111	0.125	0.116	0.118		12H	cal-27					fadu
	C	0.119	0.9583	1.0493	1.006	1.095	1.014	0.901	1.007	0.99	0.891	1.116	0.118		Control	0.8203	0.9113	0.868	0.957	0.876	0.763	0.869	0.852	0.753	0.978
	D	0.115	0.884	1.049	0.9447	1.059	0.883	1.052	0.947	1.009	1.047	1.024	0.117		shNC	0.746	0.911	0.8067	0.921	0.745	0.914	0.809	0.871	0.909	0.886
	E	0.114	0.831	0.7181	0.597	0.681	0.733	0.6388	0.7698	0.6188	0.6568	0.5028	0.116		shHtrA3	0.693	0.5801	0.459	0.543	0.595	0.5008	0.6318	0.4808	0.5188	0.3648
	F	0.113	0.115	0.12	0.121	0.122	0.12	0.138	0.137	0.137	0.14	0.138	0.119	0.138
	G	0.113	0.122	0.12	0.12	0.121	0.142	0.121	0.122	0.12	0.12	0.121	0.117
	H	0.114	0.115	0.118	0.117	0.118	0.117	0.121	0.114	0.111	0.12	0.115	0.033
	24H	1	2	3	4	5	6	7	8	9	10	11	12
	A	0.119	0.119	0.12	0.121	0.12	0.122	0.122	0.121	0.122	0.123	0.123	0.125
	B	0.118	0.116	0.117	0.116	0.112	0.115	0.129	0.126	0.114	0.121	0.124	0.116		24H	cal-27					fadu
	C	0.115	1.5586	1.5666	1.4456	1.4276	1.4636	1.386	1.253	1.504	1.421	1.246	0.117		Control	1.4254	1.4334	1.3124	1.2944	1.3304	1.2528	1.1198	1.3708	1.2878	1.1128
	D	0.114	1.5488	1.4566	1.3596	1.4756	1.5056	1.418	1.314	1.259	1.187	1.239	0.116		shNC	1.4156	1.3234	1.2264	1.3424	1.3724	1.2848	1.1808	1.1258	1.0538	1.1058
	E	0.113	0.9972	0.9795	0.8682	0.8454	0.9491	0.783	0.848	0.637	0.566	0.868	0.115		shHtrA3	0.864	0.8463	0.735	0.7122	0.8159	0.6498	0.7148	0.5038	0.4328	0.7348
	F	0.112	0.119	0.115	0.114	0.113	0.113	0.131	0.133	0.132	0.134	0.136	0.112	0.1332
	G	0.112	0.113	0.116	0.114	0.116	0.122	0.119	0.118	0.118	0.117	0.116	0.113
	H	0.116	0.112	0.115	0.114	0.114	0.115	0.117	0.121	0.12	0.116	0.119	0.114
	48H	1	2	3	4	5	6	7	8	9	10	11	12
	A	0.128	0.128	0.129	0.129	0.128	0.13	0.129	0.129	0.134	0.131	0.132	0.135
	B	0.127	0.118	0.118	0.116	0.117	0.113	0.113	0.116	0.117	0.116	0.112	0.127		48H	cal-27					fadu
	C	0.123	1.783	1.769	1.656	1.724	1.723	2.0388	1.8958	2.1218	1.8498	1.8858	0.127		Control	1.6302	1.6162	1.5032	1.5712	1.5702	1.886	1.743	1.969	1.697	1.733
	D	0.123	1.836	1.726	1.779	1.769	1.693	1.6868	2.0008	1.7658	1.8268	1.8368	0.126		shNC	1.6832	1.5732	1.6262	1.6162	1.5402	1.534	1.848	1.613	1.674	1.684
	E	0.121	1.4198	1.1988	1.1658	1.2458	1.3968	1.1106	1.2986	1.0236	1.2726	1.0776	0.125		shHtrA3	1.267	1.046	1.013	1.093	1.244	0.9578	1.1458	0.8708	1.1198	0.9248
	F	0.121	0.111	0.129	0.103	0.123	0.119	0.15	0.151	0.151	0.154	0.158	0.121	0.1528
	G	0.122	0.111	0.116	0.102	0.123	0.101	0.115	0.102	0.123	0.106	0.114	0.123
	H	0.127	0.122	0.123	0.122	0.122	0.123	0.12	0.121	0.12	0.122	0.122	0.122
	72H	1	2	3	4	5	6	7	8	9	10	11	12
	A	0.123	0.12	0.116	0.118	0.117	0.118	0.118	0.116	0.117	0.118	0.119	0.128
	B	0.121	0.123	0.128	0.108	0.114	0.115	1.447	1.457	0.415	0.393	0.38	0.118		72H	cal-27					fadu
	C	0.119	2.0466	2.0026	2.1161	2.0046	1.9306	2.1084	2.3424	2.3104	2.2844	2.1304	0.116		Control	1.915	1.871	1.9845	1.873	1.799	1.9768	2.2108	2.1788	2.1528	1.9988
	D	0.12	2.0076	1.9146	1.8986	1.8736	1.9386	2.1994	2.2014	2.1284	2.0463	2.0449	0.117		shNC	1.876	1.783	1.767	1.742	1.807	2.0678	2.0698	1.9968	1.9147	1.9133
	E	0.123	1.3546	1.4966	1.3986	1.4386	1.5706	1.441	1.555	1.424	1.3261	1.389	0.116		shHtrA3	1.223	1.365	1.267	1.307	1.439	1.3094	1.4234	1.2924	1.1945	1.2574
	F	0.119	0.119	0.113	0.113	0.116	0.117	0.129	0.131	0.133	0.132	0.133	0.112	0.1316
	G	0.118	0.112	0.115	0.129	0.126	0.114	0.12	0.118	0.123	0.121	0.109	0.115
	H	0.115	0.12	0.122	0.123	0.124	0.125	0.128	0.13	0.129	0.129	0.134	0.164
						cal-27															fadu
						Control					shNC					shHtrA3					Control					shNC					shHtrA3
						0.5232	0.6412	0.5212	0.4942	0.4922	0.4775	0.3682	0.4682	0.3842	0.4712	0.2217	0.3964	0.4944	0.3523	0.4654	0.6272	0.5222	0.5192	0.4902	0.4362	0.5172	0.5472	0.5482	0.5232	0.5192	0.3788	0.3948	0.3778	0.5268	0.3738
						0.8203	0.9113	0.868	0.957	0.876	0.746	0.911	0.8067	0.921	0.745	0.693	0.5801	0.459	0.543	0.595	0.763	0.869	0.852	0.753	0.978	0.914	0.809	0.871	0.909	0.886	0.5008	0.6318	0.4808	0.5188	0.3648
						1.4254	1.4334	1.3124	1.2944	1.3304	1.4156	1.3234	1.2264	1.3424	1.3724	0.864	0.8463	0.735	0.7122	0.8159	1.2528	1.1198	1.3708	1.2878	1.1128	1.2848	1.1808	1.1258	1.0538	1.1058	0.6498	0.7148	0.5038	0.4328	0.7348
						1.6302	1.6162	1.5032	1.5712	1.5702	1.6832	1.5732	1.6262	1.6162	1.5402	1.267	1.046	1.013	1.093	1.244	1.886	1.743	1.969	1.697	1.733	1.534	1.848	1.613	1.674	1.684	0.9578	1.1458	0.8708	1.1198	0.9248
						1.915	1.871	1.9845	1.873	1.799	1.876	1.783	1.767	1.742	1.807	1.223	1.365	1.267	1.307	1.439	1.9768	2.2108	2.1788	2.1528	1.9988	2.0678	2.0698	1.9968	1.9147	1.9133	1.3094	1.4234	1.2924	1.1945	1.2574

## Sheet: Sheet2
cal-27	Control					shNC					shHtrA3
	0.5232	0.6412	0.5212	0.4942	0.4922	0.4775	0.3682	0.4682	0.3842	0.4712	0.2217	0.3964	0.4944	0.3523	0.4654
	0.8203	0.9113	0.868	0.957	0.876	0.746	0.911	0.8067	0.921	0.745	0.693	0.5801	0.459	0.543	0.595
	1.4254	1.4334	1.3124	1.2944	1.3304	1.4156	1.3234	1.2264	1.3424	1.3724	0.864	0.8463	0.735	0.7122	0.8159
	1.6302	1.6162	1.5032	1.5712	1.5702	1.6832	1.5732	1.6262	1.6162	1.5402	1.267	1.046	1.013	1.093	1.244
	1.915	1.871	1.9845	1.873	1.799	1.876	1.783	1.767	1.742	1.807	1.223	1.365	1.267	1.307	1.439
fadu	Control					shNC					shHtrA3
	0.6272	0.5222	0.5192	0.4902	0.4362	0.5172	0.5472	0.5482	0.5232	0.5192	0.3788	0.3948	0.3778	0.5268	0.3738
	0.763	0.869	0.852	0.753	0.978	0.914	0.809	0.871	0.909	0.886	0.5008	0.6318	0.4808	0.5188	0.3648
	1.2528	1.1198	1.3708	1.2878	1.1128	1.2848	1.1808	1.1258	1.0538	1.1058	0.6498	0.7148	0.5038	0.4328	0.7348
	1.886	1.743	1.969	1.697	1.733	1.534	1.848	1.613	1.674	1.684	0.9578	1.1458	0.8708	1.1198	0.9248
	1.9768	2.2108	2.1788	2.1528	1.9988	2.0678	2.0698	1.9968	1.9147	1.9133	1.3094	1.4234	1.2924	1.1945	1.2574
	0.5232	0.6412	0.5212	0.4942	0.4922	0.6272	0.5222	0.5192	0.4902	0.4362
	0.4775	0.3682	0.4682	0.3842	0.4712	0.5172	0.5472	0.5482	0.5232	0.5192
	0.2217	0.3964	0.4944	0.3523	0.4654	0.3788	0.3948	0.3778	0.5268	0.3738
0.1408	0.664	0.782	0.662	0.635	0.633	0.768	0.663	0.66	0.631	0.577
	0.6183	0.509	0.609	0.525	0.612	0.658	0.688	0.689	0.664	0.66
	0.3625	0.5372	0.6352	0.4931	0.6062	0.5196	0.5356	0.5186	0.6676	0.5146
	0.8203	0.9113	0.868	0.957	0.876	0.763	0.869	0.852	0.753	0.978
	0.746	0.911	0.8067	0.921	0.745	0.914	0.809	0.871	0.909	0.886
	0.693	0.5801	0.459	0.543	0.595	0.5008	0.6318	0.4808	0.5188	0.3648
0.138	0.9583	1.0493	1.006	1.095	1.014	0.901	1.007	0.99	0.891	1.116
	0.884	1.049	0.9447	1.059	0.883	1.052	0.947	1.009	1.047	1.024
	0.831	0.7181	0.597	0.681	0.733	0.6388	0.7698	0.6188	0.6568	0.5028
	1.4254	1.4334	1.3124	1.2944	1.3304	1.2528	1.1198	1.3708	1.2878	1.1128
	1.4156	1.3234	1.2264	1.3424	1.3724	1.2848	1.1808	1.1258	1.0538	1.1058
	0.864	0.8463	0.735	0.7122	0.8159	0.6498	0.7148	0.5038	0.4328	0.7348
0.1332	1.5586	1.5666	1.4456	1.4276	1.4636	1.386	1.253	1.504	1.421	1.246
	1.5488	1.4566	1.3596	1.4756	1.5056	1.418	1.314	1.259	1.187	1.239
	0.9972	0.9795	0.8682	0.8454	0.9491	0.783	0.848	0.637	0.566	0.868
	1.6302	1.6162	1.5032	1.5712	1.5702	1.886	1.743	1.969	1.697	1.733
	1.6832	1.5732	1.6262	1.6162	1.5402	1.534	1.848	1.613	1.674	1.684
	1.267	1.046	1.013	1.093	1.244	0.9578	1.1458	0.8708	1.1198	0.9248
0.1528	1.783	1.769	1.656	1.724	1.723	2.0388	1.8958	2.1218	1.8498	1.8858
	1.836	1.726	1.779	1.769	1.693	1.6868	2.0008	1.7658	1.8268	1.8368
	1.4198	1.1988	1.1658	1.2458	1.3968	1.1106	1.2986	1.0236	1.2726	1.0776
	1.915	1.871	1.9845	1.873	1.799	1.9768	2.2108	2.1788	2.1528	1.9988
	1.876	1.783	1.767	1.742	1.807	2.0678	2.0698	1.9968	1.9147	1.9133
0.1316	1.223	1.365	1.267	1.307	1.439	1.3094	1.4234	1.2924	1.1945	1.2574
	2.0466	2.0026	2.1161	2.0046	1.9306	2.1084	2.3424	2.3104	2.2844	2.1304
	2.0076	1.9146	1.8986	1.8736	1.9386	2.1994	2.2014	2.1284	2.0463	2.0449
	1.3546	1.4966	1.3986	1.4386	1.5706	1.441	1.555	1.424	1.3261	1.389
