# Supplementary material for: HtrA3: a promising prognostic biomarker and therapeutic target for head and neck squamous cell carcinoma
Source: PeerJ journal article supplement (doi:10.7717/peerj.16237), 2023-10-10
Supplement: CPTAC_Validation.zip [file CPTAC_Validation.zip]

## Sheet: Input Configuration
Tumor	Dataset	Analysis	Gene
Head and Neck Cancer	Protein Abundance	Tumor vs Control	HTRA1

## Sheet: Protein Abundance Data
Tumor Abundance	Adjacent Normal Abundance	Log2 Fold Change
-0.2147	NA	NA
0.3225	NA	NA
0.4881	-0.7099	1.198
0.4891	0.4684	0.0207
-0.1031	-0.7856	0.6825
0.8406	-0.4384	1.279
0.531	NA	NA
1.1797	-0.4596	1.6393
0.5174	-0.4234	0.9408
-0.2385	0.6051	-0.8436
0.6438	0.1959	0.4479
-0.1941	-0.9165	0.7224
1.3885	NA	NA
NA	-0.8091	NA
-1.2429	0.2311	-1.474
0.6309	NA	NA
-0.4332	-1.2073	0.7741
0.074	NA	NA
NA	-0.8913	NA
-0.1653	0.4478	-0.6131
-0.3243	-0.9808	0.6565
0.6727	NA	NA
0.2842	NA	NA
0.2499	0.8943	-0.6444
0.3087	-0.1602	0.4689
0.1261	0.1481	-0.022
-0.301	0.1405	-0.4415
0.8237	NA	NA
0.2158	NA	NA
-0.2924	NA	NA
-0.0815	-0.1517	0.0702
0.3325	NA	NA
1.0668	-0.2159	1.2827
1.0993	NA	NA
-0.3999	-0.4536	0.0537
-0.2808	0.4596	-0.7404
0.3162	NA	NA
0.6975	-0.5651	1.2626
1.1121	-1.6238	2.7359
-0.4209	0.0652	-0.4861
0.5689	NA	NA
0.8618	-0.6233	1.4851
1.0407	NA	NA
-0.3364	-1.5574	1.221
-0.3054	-1.2913	0.9859
0.8929	-0.5042	1.3971
-0.355	-1.1827	0.8277
-0.4451	-1.157	0.7119
-1.4286	-1.503	0.0744
0.3274	-0.1254	0.4528
-0.3223	NA	NA
-1.1136	-1.5054	0.3918
-0.0659	-0.1797	0.1138
-0.5382	NA	NA
-0.5133	NA	NA
-0.0416	-0.3215	0.2799
0.1936	NA	NA
NA	-0.9887	NA
0.6743	NA	NA
-0.4308	NA	NA
-0.4785	NA	NA
0.0099	1.2003	-1.1904
0.068	-0.9344	1.0024
0.5008	NA	NA
-0.2779	NA	NA
-0.0839	NA	NA
-1.0673	NA	NA
0.4066	-0.1925	0.5991
0.6186	NA	NA
-0.415	-0.4024	-0.0126
2.476	-1.4983	3.9743
-0.018	-0.0608	0.0428
-0.1757	-0.2475	0.0718
-0.5575	-0.6638	0.1063
-0.3776	-0.2928	-0.0848
0.2358	-0.7124	0.9482
0.2811	-0.5868	0.8679
-0.1453	NA	NA
0.0549	NA	NA
0.2637	NA	NA
-0.1575	NA	NA
-0.8724	NA	NA
1.2029	NA	NA
1.1247	0.1747	0.95
0.7879	-0.4753	1.2632
-1.0892	NA	NA
-0.3302	-0.0439	-0.2863
-0.2475	-0.06	-0.1875
-0.0085	NA	NA
0.7828	-0.9769	1.7597
-0.3786	NA	NA
-0.0257	NA	NA
-0.6652	NA	NA
-0.3235	-0.7648	0.4413
-0.3544	-0.7988	0.4444
-0.1868	-0.3657	0.1789
0.1961	-0.8175	1.0136
1.0628	-0.9551	2.0179
-0.9865	0.6731	-1.6596
0.668	NA	NA
0.1166	-0.7533	0.8699
-0.011	-0.304	0.293
0.074	NA	NA
-0.0577	NA	NA
-0.1424	-0.5411	0.3987
2.2756	-1.245	3.5206
0.7637	-0.9172	1.6809
-0.5925	-1.0338	0.4413
1.1684	0.1969	0.9715
-0.6472	NA	NA
0.4513	NA	NA
