# Supplementary material for: HtrA3: a promising prognostic biomarker and therapeutic target for head and neck squamous cell carcinoma
Source: PeerJ journal article supplement (doi:10.7717/peerj.16237), 2023-10-10
Supplement: GO_KEGG_GSEA.zip [file GO_KEGG_GSEA.zip]

## Sheet: Sheet 1
ONTOLOGY	ID	Description	GeneRatio	BgRatio	pvalue	p.adjust	qvalue	geneID	Count	zscore
BP	GO:0097191	extrinsic apoptotic signaling pathway	38/198	221/18800	2.86556e-35	1.04564e-31	5.96339e-32	BAK1/BCL2/FADD/BCL10/DDX3X/CASP8/TNF/TNFRSF1A/BID/TGFBR1/BCL2L1/TLR3/FAS/BIRC6/RELA/HTRA2/BAD/PARK7/CFLAR/TRADD/RNF41/PTEN/TNFRSF1B/AKT1/RAF1/RIPK1/TGFB1/TRAF2/PIDD1/CRADD/NGF/CAV1/CTTN/FOXO3/CASP2/TRAF1/IL1A/BAX	38	-1.29777
BP	GO:2001233	regulation of apoptotic signaling pathway	45/198	370/18800	6.60885e-35	1.20579e-31	6.87668e-32	BCL2/SLC25A6/FADD/RIPK3/BCL10/DDX3X/TNF/BID/TGFBR1/BCL2L1/UBB/FAS/BIRC6/RELA/PRKCD/HTRA2/BAD/PARK7/CFLAR/HSPB1/PTEN/PINK1/AKT1/RAF1/BECN1/SLC25A5/PPIF/RIPK1/TRAF2/VDAC2/APAF1/MAGED1/CRADD/CAV1/CTTN/CASP2/MMP9/OPA1/FIS1/TRAF1/DNM1L/IL1A/BAX/PARL/SLC25A4	45	0.149071
BP	GO:0007249	I-kappaB kinase/NF-kappaB signaling	41/198	288/18800	1.35751e-34	1.65119e-31	9.41687e-32	CASP10/FADD/RIPK3/BCL10/SQSTM1/TICAM1/CASP8/TNF/TNFRSF1A/CD40/TAB2/CHUK/TLR3/IKBKB/TRAF6/RELA/IKBKG/UBE2N/CFLAR/TRADD/HSPB1/OTUD7B/NOD2/PINK1/AKT1/MAP3K7/RIPK1/TRAF2/RIPK2/PIDD1/OPTN/CARD8/TRAF3/NOD1/TRAF5/MALT1/SHARPIN/TRAF1/IL1A/MAP3K14/BIRC3	41	-1.09322
BP	GO:0043122	regulation of I-kappaB kinase/NF-kappaB signaling	39/198	254/18800	3.28528e-34	2.99699e-31	1.70921e-31	CASP10/FADD/BCL10/SQSTM1/TICAM1/CASP8/TNF/TNFRSF1A/CD40/TAB2/CHUK/TLR3/IKBKB/TRAF6/RELA/IKBKG/UBE2N/CFLAR/TRADD/HSPB1/OTUD7B/NOD2/PINK1/MAP3K7/RIPK1/TRAF2/RIPK2/PIDD1/OPTN/CARD8/TRAF3/NOD1/TRAF5/MALT1/SHARPIN/TRAF1/IL1A/MAP3K14/BIRC3	39	-1.1209
BP	GO:2000116	regulation of cysteine-type endopeptidase activity	34/198	229/18800	2.45965e-29	1.79506e-26	1.02373e-26	CASP10/BAK1/CASP9/MAP3K5/FADD/BCL10/DDX3X/CASP8/TNF/BID/VCP/FAS/XIAP/HTRA2/BAD/PARK7/CFLAR/AKT1/RAF1/RIPK2/PIDD1/APAF1/CRADD/CARD8/NOD1/CASP2/GSN/CYCS/MALT1/MMP9/BIRC5/FIS1/BAX/BIRC3	34	0
BP	GO:0043281	regulation of cysteine-type endopeptidase activity involved in apoptotic process	32/198	204/18800	2.03342e-28	1.23666e-25	7.05277e-26	CASP10/BAK1/CASP9/MAP3K5/BCL10/DDX3X/CASP8/TNF/BID/VCP/FAS/XIAP/HTRA2/BAD/PARK7/CFLAR/AKT1/RAF1/PIDD1/APAF1/CRADD/CARD8/NOD1/CASP2/GSN/CYCS/MALT1/MMP9/BIRC5/FIS1/BAX/BIRC3	32	0
BP	GO:0043123	positive regulation of I-kappaB kinase/NF-kappaB signaling	31/198	188/18800	3.06079e-28	1.59555e-25	9.09952e-26	CASP10/FADD/BCL10/TICAM1/CASP8/TNF/TNFRSF1A/CD40/TAB2/CHUK/TLR3/IKBKB/TRAF6/RELA/IKBKG/UBE2N/CFLAR/TRADD/NOD2/PINK1/MAP3K7/RIPK1/TRAF2/RIPK2/NOD1/TRAF5/MALT1/SHARPIN/IL1A/MAP3K14/BIRC3	31	-1.61645
BP	GO:0010952	positive regulation of peptidase activity	31/198	192/18800	6.01509e-28	2.74363e-25	1.56471e-25	CASP10/BAK1/CASP9/MAP3K5/FADD/BCL10/DDX3X/CASP8/TNF/BID/VCP/FAS/HTRA2/BAD/ADRM1/CFLAR/PINK1/RIPK2/PIDD1/APAF1/CRADD/CAV1/CARD8/NOD1/CASP2/GSN/CYCS/MALT1/FIS1/BAX/FN1	31	-0.538816
BP	GO:0010821	regulation of mitochondrion organization	28/198	148/18800	2.5575e-27	1.03693e-24	5.91367e-25	SLC25A6/SQSTM1/BID/BCL2L1/PGAM5/FBXO7/AMBRA1/HTRA2/BAD/PARK7/RHOT2/HDAC6/RNF41/PINK1/AKT1/SLC25A5/PPIF/CTTN/RHOT1/MMP9/OPA1/HAX1/FIS1/DNM1L/VDAC1/BAX/PARL/SLC25A4	28	0
BP	GO:0045862	positive regulation of proteolysis	38/198	369/18800	9.6523e-27	3.52212e-24	2.00869e-24	CASP10/BAK1/CASP9/MAP3K5/FADD/BCL10/DDX3X/CASP8/TNF/BID/VCP/FAS/STUB1/HTRA2/BAD/ADRM1/SUMO1/CFLAR/SMAD7/PTEN/TNFRSF1B/PINK1/AKT1/RIPK2/PIDD1/APAF1/CRADD/CAV1/CARD8/NOD1/ATXN3/CASP2/GSN/CYCS/MALT1/FIS1/BAX/FN1	38	-0.973329
BP	GO:2001056	positive regulation of cysteine-type endopeptidase activity	27/198	143/18800	2.40976e-26	7.99384e-24	4.55895e-24	CASP10/BAK1/CASP9/MAP3K5/FADD/BCL10/DDX3X/CASP8/TNF/BID/VCP/FAS/HTRA2/BAD/CFLAR/RIPK2/PIDD1/APAF1/CRADD/CARD8/NOD1/CASP2/GSN/CYCS/MALT1/FIS1/BAX	27	-0.57735
BP	GO:0006839	mitochondrial transport	29/198	182/18800	5.183e-26	1.57606e-23	8.98841e-24	BAK1/BCL2/SLC25A6/BID/BCL2L1/HSP90AA1/UBE2D3/FBXO7/HTRA2/BAD/TOMM22/MFN2/RHOT2/UBE2L3/PINK1/SLC25A5/PPIF/COX18/VDAC2/RHOT1/TOMM20/HSPA4/HAX1/FIS1/TOMM40/BAX/TOMM7/PARL/SLC25A4	29	-0.185695
BP	GO:0097193	intrinsic apoptotic signaling pathway	34/198	295/18800	1.39458e-25	3.91449e-23	2.23246e-23	BAK1/BCL2/CASP9/MAP3K5/RIPK3/DDX3X/TNF/TNFRSF1A/BID/BCL2L1/UBB/PRKCD/HTRA2/BAD/PARK7/HSPB1/TNFRSF1B/CASP3/PINK1/AKT1/BECN1/PPIF/TRAF2/VDAC2/CASP6/APAF1/CAV1/CASP2/MMP9/OPA1/FIS1/DNM1L/BAX/PARL	34	-0.685994
BP	GO:0052547	regulation of peptidase activity	40/198	456/18800	1.80758e-25	4.71133e-23	2.68691e-23	CASP10/BAK1/CASP9/MAP3K5/FADD/BCL10/DDX3X/CASP8/TNF/BID/VCP/FAS/BIRC6/XIAP/HTRA2/BAD/ADRM1/PARK7/CFLAR/PINK1/AKT1/RAF1/RIPK2/PIDD1/APAF1/CRADD/NGF/CAV1/CARD8/NOD1/CASP2/GSN/CYCS/MALT1/MMP9/BIRC5/FIS1/BAX/FN1/BIRC3	40	0
BP	GO:0010950	positive regulation of endopeptidase activity	28/198	174/18800	2.90908e-25	7.07683e-23	4.03597e-23	CASP10/BAK1/CASP9/MAP3K5/FADD/BCL10/DDX3X/CASP8/TNF/BID/VCP/FAS/HTRA2/BAD/ADRM1/CFLAR/RIPK2/PIDD1/APAF1/CRADD/CARD8/NOD1/CASP2/GSN/CYCS/MALT1/FIS1/BAX	28	-0.755929
BP	GO:0043280	positive regulation of cysteine-type endopeptidase activity involved in apoptotic process	25/198	125/18800	4.0695e-25	9.28101e-23	5.29303e-23	CASP10/BAK1/CASP9/MAP3K5/BCL10/DDX3X/CASP8/TNF/BID/VCP/FAS/HTRA2/BAD/CFLAR/PIDD1/APAF1/CRADD/CARD8/NOD1/CASP2/GSN/CYCS/MALT1/FIS1/BAX	25	-0.6
BP	GO:0051091	positive regulation of DNA-binding transcription factor activity	32/198	265/18800	9.58265e-25	2.05689e-22	1.17306e-22	RIPK3/BCL10/TICAM1/TNF/CD40/CAT/BMP2/CHUK/TLR3/IKBKB/TRAF6/RELA/IKBKG/PARK7/UBE2N/CFLAR/TRADD/PTEN/NOD2/PINK1/AKT1/MAP3K7/RIPK1/TRAF2/RIPK2/PIDD1/CAV1/NOD1/TRAF5/MALT1/TRAF1/PPARGC1B	32	-1.41421
BP	GO:0051090	regulation of DNA-binding transcription factor activity	39/198	452/18800	1.43755e-24	2.91424e-22	1.66202e-22	RIPK3/BCL10/TICAM1/TNF/CD40/CAT/BMP2/CHUK/TLR3/IKBKB/TRAF6/RELA/IKBKG/SUMO1/PARK7/UBE2N/CFLAR/TRADD/SMAD7/PTEN/NOD2/PINK1/AKT1/MAP3K7/RIPK1/TRAF2/RIPK2/PIDD1/MAPK3/CAV1/CARD8/TRAF3/NOD1/PKD2/COMMD1/TRAF5/MALT1/TRAF1/PPARGC1B	39	-0.800641
BP	GO:0051092	positive regulation of NF-kappaB transcription factor activity	26/198	154/18800	4.48154e-24	8.60692e-22	4.90859e-22	RIPK3/BCL10/TICAM1/TNF/CD40/CAT/CHUK/TLR3/IKBKB/TRAF6/RELA/IKBKG/UBE2N/CFLAR/TRADD/NOD2/MAP3K7/RIPK1/TRAF2/RIPK2/PIDD1/CAV1/NOD1/TRAF5/MALT1/TRAF1	26	-1.1767
BP	GO:0097300	programmed necrotic cell death	18/198	49/18800	1.00608e-23	1.83559e-21	1.04685e-21	MAP3K5/FADD/RIPK3/CASP8/TNF/PGAM5/TLR3/FAS/CFLAR/PPIF/RIPK1/TRAF2/CASP6/CAV1/DNM1L/BAX/BIRC3/SLC25A4	18	0
BP	GO:0052548	regulation of endopeptidase activity	37/198	426/18800	2.03371e-23	3.53382e-21	2.01536e-21	CASP10/BAK1/CASP9/MAP3K5/FADD/BCL10/DDX3X/CASP8/TNF/BID/VCP/FAS/BIRC6/XIAP/HTRA2/BAD/ADRM1/PARK7/CFLAR/AKT1/RAF1/RIPK2/PIDD1/APAF1/CRADD/NGF/CARD8/NOD1/CASP2/GSN/CYCS/MALT1/MMP9/BIRC5/FIS1/BAX/BIRC3	37	-0.164399
BP	GO:0009060	aerobic respiration	27/198	187/18800	4.36684e-23	7.24301e-21	4.13074e-21	TNF/BID/CAT/VCP/UQCRH/PARK7/PINK1/PPIF/SURF1/COX7A2L/SDHB/UQCRC2/COX4I1/UQCRHL/COX5A/CYC1/UQCRC1/COX5B/CYCS/COX6A1/UQCRFS1/COX7C/UQCRB/UQCR10/UQCRQ/NDUFA4/COX4I2	27	2.50185
BP	GO:2001235	positive regulation of apoptotic signaling pathway	24/198	134/18800	6.22021e-23	9.8685e-21	5.62808e-21	FADD/RIPK3/BCL10/TNF/BID/TGFBR1/UBB/FAS/PRKCD/HTRA2/BAD/PARK7/PTEN/BECN1/RIPK1/TRAF2/APAF1/MAGED1/CRADD/CAV1/CASP2/FIS1/DNM1L/BAX	24	-0.408248
BP	GO:0062197	cellular response to chemical stress	33/198	332/18800	8.95245e-23	1.36114e-20	7.76271e-21	BCL2/MAP3K5/RIPK3/DDX3X/MMP3/GFER/TNF/CAT/CHUK/FAS/FBXO7/RELA/PRKCD/HTRA2/BAD/PARK7/HDAC6/HSPB1/CASP3/MAPK1/PINK1/AKT1/BECN1/PPIF/RIPK1/MAPK3/CAV1/PKD2/FOXO3/MMP9/FOXO1/PPARGC1B/MMP2	33	-1.5667
BP	GO:0006119	oxidative phosphorylation	24/198	139/18800	1.55807e-22	2.27415e-20	1.29697e-20	TNF/BID/VCP/UQCRH/PARK7/PINK1/PPIF/COX7A2L/UQCRC2/COX4I1/UQCRHL/COX5A/CYC1/UQCRC1/COX5B/CYCS/COX6A1/UQCRFS1/COX7C/UQCRB/UQCR10/UQCRQ/NDUFA4/COX4I2	24	2.44949
BP	GO:0010506	regulation of autophagy	32/198	336/18800	1.57311e-21	2.20781e-19	1.25913e-19	BCL2/TICAM1/CALCOCO2/TAB2/FBXO7/AMBRA1/IKBKG/HTRA2/BAD/PARK7/HDAC6/HSPB1/RNF41/CASP3/NOD2/PINK1/AKT1/BECN1/SLC25A5/MAP3K7/RIPK2/OPTN/MAPK3/CTTN/NOD1/FOXO3/HAX1/FOXO1/DNM1L/VDAC1/PARL/SLC25A4	32	0
BP	GO:0000422	autophagy of mitochondrion	20/198	88/18800	1.75007e-21	2.28072e-19	1.30071e-19	SQSTM1/FBXO7/AMBRA1/HTRA2/MFN2/PARK7/HDAC6/RNF41/PINK1/BECN1/SLC25A5/OPTN/CTTN/HAX1/FIS1/DNM1L/VDAC1/TOMM7/PARL/SLC25A4	20	0.447214
BP	GO:0061726	mitochondrion disassembly	20/198	88/18800	1.75007e-21	2.28072e-19	1.30071e-19	SQSTM1/FBXO7/AMBRA1/HTRA2/MFN2/PARK7/HDAC6/RNF41/PINK1/BECN1/SLC25A5/OPTN/CTTN/HAX1/FIS1/DNM1L/VDAC1/TOMM7/PARL/SLC25A4	20	0.447214
BP	GO:0022411	cellular component disassembly	36/198	460/18800	2.89511e-21	3.64284e-19	2.07754e-19	MMP1/ADAMTS4/SQSTM1/MMP3/TNF/TGFBR1/VCP/CALCOCO2/FBXO7/AMBRA1/HTRA2/MFN2/PARK7/HDAC6/RNF41/PINK1/BECN1/SLC25A5/TGFB1/OPTN/APAF1/CTTN/GSN/MMP9/SHARPIN/HAX1/FIS1/DNM1L/VDAC1/BAX/TOMM7/PARL/MMP13/MMP2/MMP12/SLC25A4	36	0.666667
BP	GO:1903320	regulation of protein modification by small protein conjugation or removal	28/198	246/18800	5.03201e-21	6.01066e-19	3.42793e-19	BCL10/SQSTM1/TICAM1/DDX3X/TGFBR1/HSP90AA1/VCP/UBE2D1/UBB/STUB1/TRAF6/XIAP/RELA/PARK7/UBE2N/SMAD7/PTEN/UBE2L3/NOD2/PINK1/AKT1/USP4/RIPK2/AIMP2/CAV1/COMMD1/MALT1/BIRC3	28	-2.26779
BP	GO:0070265	necrotic cell death	18/198	66/18800	5.10635e-21	6.01066e-19	3.42793e-19	MAP3K5/FADD/RIPK3/CASP8/TNF/PGAM5/TLR3/FAS/CFLAR/PPIF/RIPK1/TRAF2/CASP6/CAV1/DNM1L/BAX/BIRC3/SLC25A4	18	0
BP	GO:0000302	response to reactive oxygen species	26/198	203/18800	6.70625e-21	7.64722e-19	4.36127e-19	BAK1/BCL2/MAP3K5/RIPK3/CAT/CHUK/RELA/PRKCD/BAD/PARK7/PPP1R15B/HDAC6/CASP3/MAPK1/PINK1/AKT1/BECN1/PPIF/RIPK1/MAPK3/PKD2/FOXO3/MMP9/IL1A/PPARGC1B/MMP2	26	-0.784465
BP	GO:0034612	response to tumor necrosis factor	28/198	249/18800	7.01918e-21	7.76151e-19	4.42645e-19	MAP3K5/CASP8/GFER/TNF/TNFRSF1A/CD40/CHUK/FAS/IKBKB/TRAF6/XIAP/RELA/TRADD/TNFRSF1B/CASP3/MAPK1/AKT1/RIPK1/TRAF2/MAPK3/CARD8/TRAF3/FOXO3/TRAF5/MAP2K7/SHARPIN/TRAF1/BIRC3	28	-0.755929
BP	GO:2001234	negative regulation of apoptotic signaling pathway	27/198	230/18800	1.16955e-20	1.2552e-18	7.15849e-19	BCL2/SLC25A6/DDX3X/TNF/BID/TGFBR1/BCL2L1/BIRC6/RELA/HTRA2/PARK7/CFLAR/HSPB1/PINK1/AKT1/RAF1/SLC25A5/PPIF/RIPK1/VDAC2/CTTN/MMP9/OPA1/IL1A/BAX/PARL/SLC25A4	27	-0.19245
BP	GO:0045333	cellular respiration	27/198	231/18800	1.31261e-20	1.36849e-18	7.80461e-19	TNF/BID/CAT/VCP/UQCRH/PARK7/PINK1/PPIF/SURF1/COX7A2L/SDHB/UQCRC2/COX4I1/UQCRHL/COX5A/CYC1/UQCRC1/COX5B/CYCS/COX6A1/UQCRFS1/COX7C/UQCRB/UQCR10/UQCRQ/NDUFA4/COX4I2	27	2.50185
BP	GO:0022900	electron transport chain	24/198	167/18800	1.43798e-20	1.45755e-18	8.31251e-19	CYB5A/BID/UQCRH/FDX1/PARK7/PINK1/SURF1/COX7A2L/SDHB/COX4I1/COX11/UQCRHL/COX5A/CYC1/COX5B/CYCS/COX6A1/UQCRFS1/COX7C/UQCRB/UQCR10/UQCRQ/NDUFA4/COX4I2	24	2.44949
BP	GO:0031396	regulation of protein ubiquitination	26/198	213/18800	2.32425e-20	2.29221e-18	1.30726e-18	BCL10/SQSTM1/TICAM1/DDX3X/TGFBR1/HSP90AA1/UBE2D1/UBB/STUB1/TRAF6/XIAP/PARK7/UBE2N/SMAD7/PTEN/UBE2L3/NOD2/PINK1/AKT1/USP4/RIPK2/AIMP2/CAV1/COMMD1/MALT1/BIRC3	26	-1.96116
BP	GO:0007006	mitochondrial membrane organization	21/198	117/18800	3.28711e-20	3.15649e-18	1.80017e-18	BAK1/BCL2/SLC25A6/BID/BCL2L1/HSP90AA1/BAD/TOMM22/MFN2/RHOT2/PINK1/SLC25A5/PPIF/COX18/VDAC2/RHOT1/MFN1/HSPA4/OPA1/BAX/SLC25A4	21	-0.218218
BP	GO:1903008	organelle disassembly	21/198	121/18800	6.86798e-20	6.42596e-18	3.66478e-18	SQSTM1/VCP/FBXO7/AMBRA1/HTRA2/MFN2/PARK7/HDAC6/RNF41/PINK1/BECN1/SLC25A5/OPTN/CTTN/HAX1/FIS1/DNM1L/VDAC1/TOMM7/PARL/SLC25A4	21	0.218218
BP	GO:0061912	selective autophagy	18/198	76/18800	8.52583e-20	7.66722e-18	4.37268e-18	SQSTM1/CALCOCO2/AMBRA1/HTRA2/MFN2/HDAC6/RNF41/NOD2/PINK1/BECN1/SLC25A5/RIPK2/OPTN/MAPK3/NOD1/VDAC1/TOMM7/SLC25A4	18	0
BP	GO:0046034	ATP metabolic process	28/198	273/18800	8.61486e-20	7.66722e-18	4.37268e-18	TNF/BID/VCP/UQCRH/BAD/PARK7/PINK1/PPIF/TGFB1/COX7A2L/UQCRC2/COX4I1/UQCRHL/COX5A/CYC1/UQCRC1/COX5B/CYCS/COX6A1/FIS1/UQCRFS1/DNM1L/COX7C/UQCRB/UQCR10/UQCRQ/NDUFA4/COX4I2	28	2.64575
BP	GO:0070266	necroptotic process	15/198	42/18800	9.78326e-20	8.49979e-18	4.8475e-18	FADD/RIPK3/CASP8/TNF/PGAM5/TLR3/FAS/CFLAR/PPIF/RIPK1/CASP6/CAV1/DNM1L/BIRC3/SLC25A4	15	-0.258199
BP	GO:0008637	apoptotic mitochondrial changes	20/198	107/18800	1.1457e-19	9.50147e-18	5.41876e-18	BAK1/BCL2/SLC25A6/BID/BCL2L1/BAD/RHOT2/PINK1/AKT1/SLC25A5/PPIF/VDAC2/RHOT1/MMP9/OPA1/FIS1/DNM1L/BAX/PARL/SLC25A4	20	0.894427
BP	GO:0033209	tumor necrosis factor-mediated signaling pathway	20/198	107/18800	1.1457e-19	9.50147e-18	5.41876e-18	CASP8/TNF/TNFRSF1A/CHUK/FAS/IKBKB/TRAF6/XIAP/RELA/TRADD/TNFRSF1B/RIPK1/TRAF2/CARD8/TRAF3/FOXO3/TRAF5/SHARPIN/TRAF1/BIRC3	20	-0.447214
BP	GO:0031331	positive regulation of cellular catabolic process	34/198	449/18800	1.17605e-19	9.53645e-18	5.43871e-18	TICAM1/TNF/HSP90AA1/VCP/CALCOCO2/STUB1/FBXO7/AMBRA1/IKBKG/PRKCD/BAD/SUMO1/PARK7/SMAD7/PTEN/TNFRSF1B/NOD2/PINK1/AKT1/BECN1/SLC25A5/MAP3K7/TARDBP/RIPK2/OPTN/MAPK3/CAV1/NOD1/FOXO3/ATXN3/FOXO1/VDAC1/BAX/SLC25A4	34	-0.342997
BP	GO:0042773	ATP synthesis coupled electron transport	19/198	92/18800	1.30306e-19	1.01167e-17	5.76964e-18	BID/UQCRH/PARK7/PINK1/COX7A2L/COX4I1/UQCRHL/COX5A/CYC1/COX5B/CYCS/COX6A1/UQCRFS1/COX7C/UQCRB/UQCR10/UQCRQ/NDUFA4/COX4I2	19	2.52357
BP	GO:0042775	mitochondrial ATP synthesis coupled electron transport	19/198	92/18800	1.30306e-19	1.01167e-17	5.76964e-18	BID/UQCRH/PARK7/PINK1/COX7A2L/COX4I1/UQCRHL/COX5A/CYC1/COX5B/CYCS/COX6A1/UQCRFS1/COX7C/UQCRB/UQCR10/UQCRQ/NDUFA4/COX4I2	19	2.52357
BP	GO:0071356	cellular response to tumor necrosis factor	26/198	229/18800	1.48697e-19	1.13041e-17	6.44679e-18	MAP3K5/CASP8/GFER/TNF/TNFRSF1A/CD40/CHUK/FAS/IKBKB/TRAF6/XIAP/RELA/TRADD/TNFRSF1B/MAPK1/AKT1/RIPK1/TRAF2/MAPK3/CARD8/TRAF3/FOXO3/TRAF5/SHARPIN/TRAF1/BIRC3	26	-0.784465
BP	GO:0034599	cellular response to oxidative stress	28/198	284/18800	2.50135e-19	1.86274e-17	1.06234e-17	BCL2/MAP3K5/RIPK3/MMP3/GFER/TNF/CAT/CHUK/FBXO7/RELA/PRKCD/HTRA2/PARK7/HDAC6/HSPB1/MAPK1/PINK1/AKT1/BECN1/PPIF/RIPK1/MAPK3/PKD2/FOXO3/MMP9/FOXO1/PPARGC1B/MMP2	28	-1.13389
BP	GO:0006091	generation of precursor metabolites and energy	35/198	494/18800	2.7261e-19	1.98951e-17	1.13463e-17	CYB5A/TNF/BID/CAT/VCP/UQCRH/UQCR11/FDX1/PARK7/PINK1/AKT1/PPIF/SURF1/COX7A2L/SDHB/UQCRC2/COX8A/COX4I1/COX11/UQCRHL/COX5A/CYC1/UQCRC1/COX5B/CYCS/COX6A1/UQCRFS1/COX7C/UQCRB/UQCR10/UQCRQ/NDUFA4/COX4I2/COX6C/SLC25A4	35	2.53546
BP	GO:0006979	response to oxidative stress	33/198	433/18800	3.53021e-19	2.52339e-17	1.43911e-17	BAK1/BCL2/MAP3K5/RIPK3/MMP3/GFER/TNF/CAT/CHUK/FBXO7/RELA/PRKCD/HTRA2/BAD/PARK7/PPP1R15B/HDAC6/HSPB1/CASP3/MAPK1/PINK1/AKT1/BECN1/PPIF/RIPK1/MAPK3/PKD2/FOXO3/MMP9/FOXO1/IL1A/PPARGC1B/MMP2	33	-1.5667
BP	GO:0022904	respiratory electron transport chain	20/198	113/18800	3.59595e-19	2.52339e-17	1.43911e-17	BID/UQCRH/PARK7/PINK1/COX7A2L/SDHB/COX4I1/UQCRHL/COX5A/CYC1/COX5B/CYCS/COX6A1/UQCRFS1/COX7C/UQCRB/UQCR10/UQCRQ/NDUFA4/COX4I2	20	2.68328
BP	GO:1903146	regulation of autophagy of mitochondrion	14/198	36/18800	4.02268e-19	2.76958e-17	1.57951e-17	FBXO7/AMBRA1/HTRA2/PARK7/HDAC6/RNF41/PINK1/SLC25A5/CTTN/HAX1/DNM1L/VDAC1/PARL/SLC25A4	14	0
BP	GO:1902600	proton transmembrane transport	21/198	133/18800	5.34968e-19	3.615e-17	2.06166e-17	CYB5A/UQCRH/PARK7/SLC25A5/PPIF/SURF1/COX7A2L/COX8A/COX4I1/COX5A/COX7B/CYC1/UQCRC1/COX5B/COX6A1/UQCRFS1/UQCR10/NDUFA4/COX6B1/COX4I2/SLC25A4	21	3.27327
BP	GO:0019646	aerobic electron transport chain	18/198	84/18800	6.01529e-19	3.96836e-17	2.26319e-17	UQCRH/PARK7/PINK1/COX7A2L/COX4I1/UQCRHL/COX5A/CYC1/COX5B/CYCS/COX6A1/UQCRFS1/COX7C/UQCRB/UQCR10/UQCRQ/NDUFA4/COX4I2	18	2.82843
BP	GO:2001236	regulation of extrinsic apoptotic signaling pathway	22/198	153/18800	6.09012e-19	3.96836e-17	2.26319e-17	BCL2/FADD/BCL10/DDX3X/TNF/BID/TGFBR1/BCL2L1/BIRC6/RELA/HTRA2/PARK7/CFLAR/PTEN/AKT1/RAF1/RIPK1/TRAF2/CAV1/CTTN/TRAF1/IL1A	22	-1.2792
BP	GO:0008625	extrinsic apoptotic signaling pathway via death domain receptors	18/198	85/18800	7.56194e-19	4.84097e-17	2.76084e-17	BCL2/FADD/DDX3X/CASP8/TNF/TNFRSF1A/BID/BCL2L1/BAD/PARK7/CFLAR/TRADD/PTEN/RAF1/PIDD1/CRADD/NGF/BAX	18	-1.88562
BP	GO:0070997	neuron death	30/198	353/18800	8.12923e-19	5.11441e-17	2.91679e-17	BCL2/CASP9/CASP7/MAP3K5/FADD/CASP8/GFER/TNF/BID/BCL2L1/UBB/FAS/FBXO7/XIAP/IKBKG/HTRA2/BAD/PARK7/TNFRSF1B/CASP3/PINK1/AKT1/TRAF2/APAF1/AIMP2/NGF/FOXO3/MAP2K7/CASP2/BAX	30	-2.19089
BP	GO:0031398	positive regulation of protein ubiquitination	20/198	121/18800	1.48862e-18	9.20675e-17	5.25068e-17	BCL10/TICAM1/DDX3X/UBE2D1/UBB/STUB1/TRAF6/XIAP/UBE2N/SMAD7/PTEN/UBE2L3/NOD2/PINK1/RIPK2/AIMP2/CAV1/COMMD1/MALT1/BIRC3	20	-1.78885
BP	GO:1903322	positive regulation of protein modification by small protein conjugation or removal	21/198	140/18800	1.60961e-18	9.78908e-17	5.58279e-17	BCL10/TICAM1/DDX3X/VCP/UBE2D1/UBB/STUB1/TRAF6/XIAP/UBE2N/SMAD7/PTEN/UBE2L3/NOD2/PINK1/RIPK2/AIMP2/CAV1/COMMD1/MALT1/BIRC3	21	-1.96396
BP	GO:0070585	protein localization to mitochondrion	20/198	125/18800	2.91019e-18	1.74087e-16	9.92829e-17	BID/HSP90AA1/UBE2D3/FBXO7/HTRA2/TOMM22/MFN2/UBE2L3/PINK1/AKT1/COX18/TOMM20/HSPA4/HAX1/FIS1/DNM1L/TOMM40/BAX/TOMM7/PARL	20	0.447214
BP	GO:0006919	activation of cysteine-type endopeptidase activity involved in apoptotic process	17/198	77/18800	3.39703e-18	1.99931e-16	1.14022e-16	CASP10/BAK1/CASP9/CASP8/TNF/BID/VCP/BAD/CFLAR/PIDD1/APAF1/CRADD/CARD8/NOD1/CASP2/CYCS/BAX	17	-0.242536
BP	GO:0015980	energy derivation by oxidation of organic compounds	28/198	321/18800	6.54175e-18	3.78902e-16	2.16091e-16	TNF/BID/CAT/VCP/UQCRH/PARK7/PINK1/AKT1/PPIF/SURF1/COX7A2L/SDHB/UQCRC2/COX4I1/UQCRHL/COX5A/CYC1/UQCRC1/COX5B/CYCS/COX6A1/UQCRFS1/COX7C/UQCRB/UQCR10/UQCRQ/NDUFA4/COX4I2	28	2.64575
BP	GO:2001242	regulation of intrinsic apoptotic signaling pathway	22/198	171/18800	7.11927e-18	4.0591e-16	2.31493e-16	BCL2/RIPK3/DDX3X/BID/BCL2L1/UBB/HTRA2/BAD/PARK7/HSPB1/PINK1/AKT1/BECN1/PPIF/VDAC2/CAV1/MMP9/OPA1/FIS1/DNM1L/BAX/PARL	22	0
BP	GO:0000423	mitophagy	13/198	34/18800	1.00776e-17	5.65738e-16	3.22645e-16	SQSTM1/AMBRA1/HTRA2/MFN2/HDAC6/RNF41/PINK1/BECN1/SLC25A5/OPTN/VDAC1/TOMM7/SLC25A4	13	-0.27735
BP	GO:0010508	positive regulation of autophagy	20/198	136/18800	1.63095e-17	9.01719e-16	5.14257e-16	TICAM1/CALCOCO2/FBXO7/AMBRA1/IKBKG/BAD/PARK7/NOD2/PINK1/BECN1/SLC25A5/MAP3K7/RIPK2/OPTN/MAPK3/NOD1/FOXO3/FOXO1/VDAC1/SLC25A4	20	0.447214
BP	GO:0072655	establishment of protein localization to mitochondrion	19/198	120/18800	2.57468e-17	1.40224e-15	7.99707e-16	BID/HSP90AA1/UBE2D3/FBXO7/HTRA2/TOMM22/MFN2/UBE2L3/PINK1/AKT1/COX18/TOMM20/HSPA4/HAX1/FIS1/TOMM40/BAX/TOMM7/PARL	19	0.229416
BP	GO:0010822	positive regulation of mitochondrion organization	16/198	75/18800	6.1609e-17	3.30605e-15	1.88546e-15	BID/PGAM5/FBXO7/AMBRA1/HTRA2/BAD/PARK7/PINK1/SLC25A5/PPIF/MMP9/FIS1/DNM1L/VDAC1/BAX/SLC25A4	16	0
BP	GO:0034614	cellular response to reactive oxygen species	20/198	147/18800	7.84519e-17	4.14886e-15	2.36613e-15	MAP3K5/RIPK3/CAT/CHUK/RELA/PRKCD/PARK7/HDAC6/MAPK1/PINK1/AKT1/BECN1/PPIF/RIPK1/MAPK3/PKD2/FOXO3/MMP9/PPARGC1B/MMP2	20	0
BP	GO:0001836	release of cytochrome c from mitochondria	14/198	56/18800	5.11859e-16	2.66825e-14	1.52172e-14	BAK1/BCL2/BID/BCL2L1/BAD/PINK1/AKT1/PPIF/MMP9/OPA1/FIS1/DNM1L/BAX/PARL	14	0.534522
BP	GO:0000209	protein polyubiquitination	23/198	244/18800	1.30176e-15	6.69029e-14	3.81552e-14	BCL2/UBE2L6/DDX3X/UBE2D1/UBE2D3/STUB1/TRAF6/AMBRA1/XIAP/UBE2G2/UBE2N/HDAC6/RNF41/UBE2L3/NOD2/UBE2G1/TRAF2/UBE2E2/TRAF3/TRAF5/SHARPIN/TRAF1/UBE2D2	23	-1.87663
BP	GO:0051403	stress-activated MAPK cascade	23/198	245/18800	1.42369e-15	7.21536e-14	4.11497e-14	MAP3K5/TNF/BMP2/TLR3/FAS/IKBKB/TRAF6/XIAP/NOD2/MAPK1/PINK1/MAP3K7/RIPK1/TRAF2/RIPK2/MAPK3/TRAF3/NOD1/TRAF5/MAP2K7/TRAF1/FOXO1/IL1A	23	0.208514
BP	GO:0042542	response to hydrogen peroxide	18/198	128/18800	1.60448e-15	8.02019e-14	4.57398e-14	BAK1/BCL2/MAP3K5/RIPK3/CAT/RELA/PRKCD/BAD/PARK7/PPP1R15B/HDAC6/CASP3/PINK1/BECN1/PPIF/RIPK1/FOXO3/MMP2	18	-1.88562
BP	GO:0032872	regulation of stress-activated MAPK cascade	21/198	198/18800	2.22692e-15	1.09811e-13	6.26261e-14	MAP3K5/TNF/BMP2/TLR3/FAS/TRAF6/XIAP/NOD2/MAPK1/PINK1/RIPK1/TRAF2/RIPK2/MAPK3/TRAF3/NOD1/TRAF5/MAP2K7/TRAF1/FOXO1/IL1A	21	0.218218
BP	GO:0031098	stress-activated protein kinase signaling cascade	23/198	252/18800	2.63383e-15	1.28145e-13	7.3082e-14	MAP3K5/TNF/BMP2/TLR3/FAS/IKBKB/TRAF6/XIAP/NOD2/MAPK1/PINK1/MAP3K7/RIPK1/TRAF2/RIPK2/MAPK3/TRAF3/NOD1/TRAF5/MAP2K7/TRAF1/FOXO1/IL1A	23	0.208514
BP	GO:0033674	positive regulation of kinase activity	30/198	476/18800	3.00736e-15	1.43246e-13	8.1694e-14	MAP3K5/RIPK3/BCL10/DDX3X/TNF/HSP90AA1/CD40/TAB2/BMP2/TLR3/TRAF6/AMBRA1/PRKCD/BAD/PARK7/BMPR2/TAB1/NOD2/PINK1/AKT1/MAP3K7/TGFB1/TRAF2/BMPR1A/MAGED1/PPP2CA/PKD2/MAP2K7/MALT1/TGFBR2	30	-1.46059
BP	GO:0070302	regulation of stress-activated protein kinase signaling cascade	21/198	201/18800	3.02272e-15	1.43246e-13	8.1694e-14	MAP3K5/TNF/BMP2/TLR3/FAS/TRAF6/XIAP/NOD2/MAPK1/PINK1/RIPK1/TRAF2/RIPK2/MAPK3/TRAF3/NOD1/TRAF5/MAP2K7/TRAF1/FOXO1/IL1A	21	0.218218
BP	GO:0038034	signal transduction in absence of ligand	14/198	66/18800	6.22713e-15	2.8763e-13	1.64038e-13	BAK1/BCL2/FADD/TNF/BCL2L1/FAS/HTRA2/BAD/AKT1/RIPK1/FOXO3/CASP2/IL1A/BAX	14	-0.534522
BP	GO:0097192	extrinsic apoptotic signaling pathway in absence of ligand	14/198	66/18800	6.22713e-15	2.8763e-13	1.64038e-13	BAK1/BCL2/FADD/TNF/BCL2L1/FAS/HTRA2/BAD/AKT1/RIPK1/FOXO3/CASP2/IL1A/BAX	14	-0.534522
BP	GO:0071214	cellular response to abiotic stimulus	25/198	323/18800	7.07807e-15	3.18863e-13	1.8185e-13	MMP1/BAK1/CASP9/FADD/BCL10/DDX3X/CASP8/MMP3/TNFRSF1A/BCL2L1/CD40/TLR3/FAS/PRKCD/BAD/PTEN/CASP3/CRADD/MAPK3/PKD2/CASP2/MMP9/BAX/MAP3K14/MMP2	25	-1.8
BP	GO:0104004	cellular response to environmental stimulus	25/198	323/18800	7.07807e-15	3.18863e-13	1.8185e-13	MMP1/BAK1/CASP9/FADD/BCL10/DDX3X/CASP8/MMP3/TNFRSF1A/BCL2L1/CD40/TLR3/FAS/PRKCD/BAD/PTEN/CASP3/CRADD/MAPK3/PKD2/CASP2/MMP9/BAX/MAP3K14/MMP2	25	-1.8
BP	GO:0006626	protein targeting to mitochondrion	16/198	101/18800	9.07838e-15	4.03988e-13	2.30397e-13	BID/HSP90AA1/UBE2D3/FBXO7/HTRA2/TOMM22/MFN2/UBE2L3/PINK1/TOMM20/HSPA4/HAX1/FIS1/TOMM40/TOMM7/PARL	16	-0.5
BP	GO:0045860	positive regulation of protein kinase activity	27/198	396/18800	1.23571e-14	5.43264e-13	3.09828e-13	MAP3K5/RIPK3/DDX3X/TNF/HSP90AA1/CD40/TAB2/BMP2/TLR3/TRAF6/PRKCD/PARK7/BMPR2/TAB1/NOD2/PINK1/AKT1/MAP3K7/TGFB1/TRAF2/BMPR1A/MAGED1/PPP2CA/PKD2/MAP2K7/MALT1/TGFBR2	27	-0.96225
BP	GO:0016236	macroautophagy	24/198	306/18800	1.89744e-14	8.24256e-13	4.70079e-13	SQSTM1/VCP/PGAM5/CALCOCO2/AMBRA1/IKBKG/HTRA2/MFN2/HDAC6/RNF41/CASP3/NOD2/PINK1/AKT1/BECN1/SLC25A5/MAP3K7/RIPK2/OPTN/MAPK3/NOD1/VDAC1/TOMM7/SLC25A4	24	-0.408248
BP	GO:2000377	regulation of reactive oxygen species metabolic process	18/198	147/18800	1.92851e-14	8.27899e-13	4.72157e-13	BCL2/RIPK3/MMP3/TNF/PRKCD/PARK7/HDAC6/CFLAR/RNF41/SIRT5/PINK1/BECN1/RIPK1/TGFB1/FOXO3/TGFBR2/FOXO1/PARL	18	-0.942809
BP	GO:0006122	mitochondrial electron transport, ubiquinol to cytochrome c	8/198	11/18800	2.10971e-14	8.95154e-13	5.10513e-13	UQCRH/UQCRHL/CYC1/CYCS/UQCRFS1/UQCRB/UQCR10/UQCRQ	8	2.12132
BP	GO:0016239	positive regulation of macroautophagy	14/198	73/18800	2.78886e-14	1.16972e-12	6.671e-13	CALCOCO2/AMBRA1/IKBKG/NOD2/PINK1/BECN1/SLC25A5/MAP3K7/RIPK2/OPTN/MAPK3/NOD1/VDAC1/SLC25A4	14	1.06904
BP	GO:1901214	regulation of neuron death	24/198	313/18800	3.13116e-14	1.29836e-12	7.40467e-13	BCL2/CASP9/MAP3K5/CASP8/GFER/TNF/BCL2L1/UBB/FBXO7/IKBKG/HTRA2/BAD/PARK7/TNFRSF1B/CASP3/PINK1/AKT1/TRAF2/AIMP2/NGF/FOXO3/MAP2K7/CASP2/BAX	24	-1.63299
BP	GO:0018105	peptidyl-serine phosphorylation	24/198	315/18800	3.60423e-14	1.47774e-12	8.42764e-13	BAK1/BCL2/TNF/TGFBR1/HSP90AA1/CHUK/IKBKB/PRKCD/PARK7/HDAC6/SMAD7/PTEN/MAPK1/PINK1/AKT1/RAF1/RIPK1/TGFB1/RIPK2/NGF/CAV1/HAX1/TGFBR2/BAX	24	-0.816497
BP	GO:0009612	response to mechanical stimulus	20/198	201/18800	3.64783e-14	1.47899e-12	8.43481e-13	BAK1/FADD/BCL10/CASP8/TNF/TNFRSF1A/CD40/TLR3/FAS/RELA/BAD/RAF1/CRADD/MAPK3/PKD2/CASP2/GSN/TGFBR2/MAP3K14/MMP2	20	-0.447214
BP	GO:0019221	cytokine-mediated signaling pathway	29/198	486/18800	3.71541e-14	1.48984e-12	8.49666e-13	FADD/CASP8/TNF/TNFRSF1A/CHUK/FAS/IKBKB/TRAF6/XIAP/RELA/BAD/TRADD/TNFRSF1B/AKT1/MAP3K7/RIPK1/TRAF2/RIPK2/MAPK3/CAV1/CARD8/TRAF3/FOXO3/TRAF5/SHARPIN/TRAF1/IL1A/BIRC3/MMP12	29	0.557086
BP	GO:0016241	regulation of macroautophagy	18/198	158/18800	6.91413e-14	2.73722e-12	1.56105e-12	CALCOCO2/AMBRA1/IKBKG/HDAC6/RNF41/CASP3/NOD2/PINK1/AKT1/BECN1/SLC25A5/MAP3K7/RIPK2/OPTN/MAPK3/NOD1/VDAC1/SLC25A4	18	0.471405
BP	GO:0046902	regulation of mitochondrial membrane permeability	13/198	62/18800	6.97619e-14	2.73722e-12	1.56105e-12	BAK1/BCL2/SLC25A6/BID/BCL2L1/BAD/RHOT2/SLC25A5/PPIF/VDAC2/RHOT1/BAX/SLC25A4	13	-0.27735
BP	GO:0046330	positive regulation of JNK cascade	15/198	96/18800	7.90004e-14	3.06673e-12	1.74898e-12	MAP3K5/TNF/TLR3/TRAF6/XIAP/NOD2/RIPK1/TRAF2/RIPK2/TRAF3/NOD1/TRAF5/MAP2K7/TRAF1/IL1A	15	0.774597
BP	GO:0036473	cell death in response to oxidative stress	15/198	98/18800	1.08332e-13	4.1611e-12	2.37311e-12	BCL2/MAP3K5/MMP3/GFER/TNF/FBXO7/PRKCD/HTRA2/PARK7/HDAC6/HSPB1/PINK1/AKT1/RIPK1/FOXO3	15	-2.32379
BP	GO:0098780	response to mitochondrial depolarisation	9/198	19/18800	1.12038e-13	4.2586e-12	2.42871e-12	SQSTM1/AMBRA1/HTRA2/MFN2/HDAC6/PINK1/BECN1/OPTN/TOMM7	9	-1
BP	GO:0018209	peptidyl-serine modification	24/198	338/18800	1.6918e-13	6.36432e-12	3.62962e-12	BAK1/BCL2/TNF/TGFBR1/HSP90AA1/CHUK/IKBKB/PRKCD/PARK7/HDAC6/SMAD7/PTEN/MAPK1/PINK1/AKT1/RAF1/RIPK1/TGFB1/RIPK2/NGF/CAV1/HAX1/TGFBR2/BAX	24	-0.816497
BP	GO:0033135	regulation of peptidyl-serine phosphorylation	17/198	144/18800	1.94169e-13	7.22984e-12	4.12323e-12	BAK1/BCL2/TNF/HSP90AA1/PARK7/HDAC6/SMAD7/PTEN/PINK1/AKT1/RAF1/TGFB1/RIPK2/NGF/CAV1/HAX1/BAX	17	-0.242536
BP	GO:0097194	execution phase of apoptosis	14/198	84/18800	2.16381e-13	7.97548e-12	4.54848e-12	CASP10/CASP9/CASP7/CASP8/BCL2L1/HTRA2/CFLAR/CASP3/AKT1/CASP6/APAF1/CASP2/SHARPIN/BAX	14	-0.534522
BP	GO:0071260	cellular response to mechanical stimulus	13/198	70/18800	3.70315e-13	1.35128e-11	7.70645e-12	BAK1/FADD/BCL10/CASP8/TNFRSF1A/CD40/TLR3/FAS/BAD/CRADD/MAPK3/CASP2/MAP3K14	13	-1.38675
BP	GO:0032874	positive regulation of stress-activated MAPK cascade	16/198	132/18800	6.728e-13	2.43074e-11	1.38627e-11	MAP3K5/TNF/BMP2/TLR3/TRAF6/XIAP/NOD2/RIPK1/TRAF2/RIPK2/TRAF3/NOD1/TRAF5/MAP2K7/TRAF1/IL1A	16	0.5
BP	GO:0070304	positive regulation of stress-activated protein kinase signaling cascade	16/198	134/18800	8.52712e-13	3.05054e-11	1.73974e-11	MAP3K5/TNF/BMP2/TLR3/TRAF6/XIAP/NOD2/RIPK1/TRAF2/RIPK2/TRAF3/NOD1/TRAF5/MAP2K7/TRAF1/IL1A	16	0.5
BP	GO:0043254	regulation of protein-containing complex assembly	25/198	401/18800	9.45143e-13	3.34837e-11	1.9096e-11	MMP1/BAK1/TICAM1/DDX3X/MMP3/TNF/BID/HSP90AA1/VCP/STUB1/AMBRA1/PRKCD/SUMO1/PARK7/HDAC6/PINK1/RAF1/TGFB1/TRAF2/VDAC2/CTTN/CARD8/GSN/HAX1/BAX	25	-1.4
BP	GO:0001819	positive regulation of cytokine production	27/198	475/18800	9.64117e-13	3.38275e-11	1.92921e-11	FADD/BCL10/TICAM1/DDX3X/CASP8/LUM/TNF/HSP90AA1/CD40/CHUK/TLR3/TRAF6/RELA/PARK7/HSPB1/NOD2/MAP3K7/RIPK1/TGFB1/TRAF2/RIPK2/BMPR1A/CARD8/NOD1/MALT1/IL1A/MMP12	27	-0.96225
BP	GO:0090199	regulation of release of cytochrome c from mitochondria	11/198	46/18800	1.29399e-12	4.49692e-11	2.56463e-11	BID/BCL2L1/BAD/PINK1/AKT1/PPIF/MMP9/OPA1/DNM1L/BAX/PARL	11	0.904534
BP	GO:0090559	regulation of membrane permeability	13/198	77/18800	1.34426e-12	4.62754e-11	2.63912e-11	BAK1/BCL2/SLC25A6/BID/BCL2L1/BAD/RHOT2/SLC25A5/PPIF/VDAC2/RHOT1/BAX/SLC25A4	13	-0.27735
BP	GO:2001237	negative regulation of extrinsic apoptotic signaling pathway	14/198	97/18800	1.692e-12	5.77021e-11	3.29079e-11	BCL2/DDX3X/TNF/TGFBR1/BCL2L1/BIRC6/RELA/PARK7/CFLAR/AKT1/RAF1/RIPK1/CTTN/IL1A	14	-1.06904
BP	GO:0010638	positive regulation of organelle organization	27/198	487/18800	1.73024e-12	5.84597e-11	3.334e-11	TNF/BID/TGFBR1/PGAM5/CALCOCO2/FBXO7/AMBRA1/HTRA2/BAD/PARK7/MAPK1/PINK1/BECN1/SLC25A5/PPIF/MAPK3/CTTN/MAP2K7/GSN/MMP9/HAX1/FIS1/DNM1L/IL1A/VDAC1/BAX/SLC25A4	27	0.57735
BP	GO:0038061	NIK/NF-kappaB signaling	16/198	141/18800	1.89506e-12	6.28642e-11	3.58519e-11	RIPK3/DDX3X/TNF/CHUK/TLR3/TRAF6/RELA/TRADD/NOD2/AKT1/MAP3K7/TRAF2/NOD1/MALT1/MAP3K14/BIRC3	16	-0.5
BP	GO:0046328	regulation of JNK cascade	16/198	141/18800	1.89506e-12	6.28642e-11	3.58519e-11	MAP3K5/TNF/TLR3/TRAF6/XIAP/NOD2/PINK1/RIPK1/TRAF2/RIPK2/TRAF3/NOD1/TRAF5/MAP2K7/TRAF1/IL1A	16	0.5
BP	GO:2001243	negative regulation of intrinsic apoptotic signaling pathway	14/198	102/18800	3.43583e-12	1.12949e-10	6.44158e-11	BCL2/DDX3X/BID/BCL2L1/HTRA2/PARK7/HSPB1/PINK1/AKT1/PPIF/VDAC2/MMP9/OPA1/PARL	14	-0.534522
BP	GO:0072594	establishment of protein localization to organelle	25/198	431/18800	4.62128e-12	1.50563e-10	8.58672e-11	SQSTM1/BID/HSP90AA1/UBE2D3/FBXO7/PRKCD/HTRA2/TOMM22/MFN2/SUMO1/UBE2L3/PINK1/AKT1/TARDBP/TGFB1/COX18/TOMM20/HSPA4/HAX1/FIS1/TOMM40/BAX/TOMM7/PARL/MMP12	25	0.2
BP	GO:0007254	JNK cascade	17/198	175/18800	4.81258e-12	1.55408e-10	8.86303e-11	MAP3K5/TNF/TLR3/TRAF6/XIAP/NOD2/PINK1/MAP3K7/RIPK1/TRAF2/RIPK2/TRAF3/NOD1/TRAF5/MAP2K7/TRAF1/IL1A	17	0.727607
BP	GO:0072593	reactive oxygen species metabolic process	19/198	231/18800	4.98411e-12	1.59535e-10	9.09842e-11	BCL2/RIPK3/MMP3/TNF/CAT/PRKCD/PARK7/HDAC6/CFLAR/RNF41/SIRT5/PINK1/BECN1/RIPK1/TGFB1/FOXO3/TGFBR2/FOXO1/PARL	19	-1.14708
BP	GO:0006123	mitochondrial electron transport, cytochrome c to oxygen	8/198	18/18800	5.25244e-12	1.66662e-10	9.50488e-11	COX7A2L/COX4I1/COX5A/COX5B/CYCS/COX6A1/COX7C/COX4I2	8	2.82843
BP	GO:0060544	regulation of necroptotic process	9/198	28/18800	7.71896e-12	2.42814e-10	1.38479e-10	FADD/RIPK3/CASP8/CFLAR/RIPK1/CASP6/CAV1/BIRC3/SLC25A4	9	0.333333
BP	GO:0071902	positive regulation of protein serine/threonine kinase activity	18/198	208/18800	7.9146e-12	2.46841e-10	1.40775e-10	MAP3K5/DDX3X/TNF/CD40/BMP2/TRAF6/BMPR2/TAB1/NOD2/AKT1/MAP3K7/TGFB1/TRAF2/BMPR1A/MAGED1/PPP2CA/PKD2/MAP2K7	18	0
BP	GO:0097202	activation of cysteine-type endopeptidase activity	8/198	19/18800	8.99092e-12	2.78033e-10	1.58564e-10	BAK1/CASP9/FADD/CASP8/BAD/RIPK2/APAF1/CYCS	8	-0.707107
BP	GO:0071900	regulation of protein serine/threonine kinase activity	23/198	372/18800	9.70118e-12	2.97476e-10	1.69653e-10	MAP3K5/DDX3X/TNF/CD40/BMP2/FBXO7/TRAF6/PRKCD/BMPR2/PTEN/CASP3/TAB1/NOD2/AKT1/MAP3K7/TGFB1/TRAF2/BMPR1A/MAGED1/CAV1/PPP2CA/PKD2/MAP2K7	23	-0.625543
BP	GO:0051881	regulation of mitochondrial membrane potential	12/198	71/18800	9.91011e-12	3.0135e-10	1.71862e-10	BAK1/BCL2/BID/BCL2L1/VCP/UBB/BAD/PARK7/PINK1/AKT1/MFN1/BAX	12	-1.73205
BP	GO:0016485	protein processing	19/198	243/18800	1.21498e-11	3.66401e-10	2.08961e-10	COMP/BAK1/CASP9/CASP7/FADD/CASP8/XIAP/HTRA2/BAD/CASP3/RIPK2/PIDD1/CASP6/APAF1/CARD8/CASP2/GSN/CYCS/PARL	19	-0.229416
BP	GO:0043410	positive regulation of MAPK cascade	26/198	491/18800	1.29307e-11	3.86756e-10	2.2057e-10	MAP3K5/TNF/TGFBR1/CD40/BMP2/TLR3/TRAF6/XIAP/CFLAR/PTEN/TAB1/NOD2/RAF1/MAP3K7/RIPK1/TGFB1/TRAF2/RIPK2/MAGED1/MAPK3/TRAF3/NOD1/TRAF5/MAP2K7/TRAF1/IL1A	26	0.392232
BP	GO:0070534	protein K63-linked ubiquitination	11/198	57/18800	1.61813e-11	4.80046e-10	2.73774e-10	DDX3X/STUB1/TRAF6/UBE2N/NOD2/UBE2G1/TRAF2/UBE2E2/TRAF3/TRAF5/TRAF1	11	-0.301511
BP	GO:0062098	regulation of programmed necrotic cell death	9/198	31/18800	2.19246e-11	6.45183e-10	3.67953e-10	FADD/RIPK3/CASP8/CFLAR/RIPK1/CASP6/CAV1/BIRC3/SLC25A4	9	0.333333
BP	GO:1903201	regulation of oxidative stress-induced cell death	12/198	77/18800	2.69224e-11	7.85919e-10	4.48216e-10	MMP3/GFER/TNF/FBXO7/HTRA2/PARK7/HDAC6/HSPB1/PINK1/AKT1/RIPK1/FOXO3	12	-1.73205
BP	GO:0009615	response to virus	23/198	392/18800	2.79733e-11	8.10116e-10	4.62016e-10	BCL2/FADD/RIPK3/TICAM1/DDX3X/TNF/BCL2L1/HSP90AA1/CD40/CHUK/TLR3/IKBKB/RELA/IKBKG/HSPB1/BECN1/CARD8/TRAF3/HTRA1/BAX/MAP3K14/BIRC3/MMP12	23	-1.4596
BP	GO:0010939	regulation of necrotic cell death	10/198	46/18800	3.91992e-11	1.12628e-09	6.42328e-10	FADD/RIPK3/CASP8/CFLAR/PPIF/RIPK1/CASP6/CAV1/BIRC3/SLC25A4	10	0.632456
BP	GO:0009411	response to UV	15/198	146/18800	4.04638e-11	1.15353e-09	6.57869e-10	MMP1/BAK1/BCL2/CASP9/CASP7/MMP3/CAT/RELA/PRKCD/CASP3/AKT1/MAP2K7/MMP9/BAX/MMP2	15	-1.29099
BP	GO:0031663	lipopolysaccharide-mediated signaling pathway	11/198	62/18800	4.25801e-11	1.20445e-09	6.8691e-10	BCL10/TICAM1/TNF/TRAF6/MAPK1/AKT1/TGFB1/RIPK2/MAPK3/CARD8/MALT1	11	0.301511
BP	GO:0002764	immune response-regulating signaling pathway	25/198	482/18800	5.15217e-11	1.44617e-09	8.24764e-10	BCL2/BCL10/TICAM1/DDX3X/TNF/CD40/TLR3/IKBKB/TRAF6/XIAP/RELA/IKBKG/PRKCD/UBE2N/NOD2/MAPK1/MAP3K7/RIPK2/CAV1/TRAF3/NOD1/MAP2K7/MALT1/BAX/BIRC3	25	-1.4
BP	GO:0002221	pattern recognition receptor signaling pathway	16/198	176/18800	5.7214e-11	1.59369e-09	9.08895e-10	BCL10/TICAM1/DDX3X/TNF/CD40/TLR3/TRAF6/XIAP/RELA/NOD2/MAP3K7/RIPK2/CAV1/TRAF3/NOD1/BIRC3	16	-1
BP	GO:0051402	neuron apoptotic process	18/198	241/18800	9.21394e-11	2.54709e-09	1.45263e-09	BCL2/CASP9/CASP7/FADD/TNF/BID/BCL2L1/FAS/XIAP/PARK7/CASP3/PINK1/APAF1/NGF/FOXO3/MAP2K7/CASP2/BAX	18	-1.41421
BP	GO:0033138	positive regulation of peptidyl-serine phosphorylation	13/198	107/18800	1.00601e-10	2.76009e-09	1.5741e-09	BCL2/TNF/HSP90AA1/PARK7/HDAC6/PINK1/AKT1/RAF1/TGFB1/RIPK2/NGF/CAV1/HAX1	13	0.27735
BP	GO:0071496	cellular response to external stimulus	20/198	309/18800	1.0491e-10	2.85685e-09	1.62928e-09	BAK1/BCL2/MAP3K5/FADD/BCL10/CASP8/TNFRSF1A/CD40/TLR3/FAS/BAD/BMPR2/MAPK1/BECN1/CRADD/MAPK3/FOXO3/CASP2/FOXO1/MAP3K14	20	-1.34164
BP	GO:0010823	negative regulation of mitochondrion organization	10/198	51/18800	1.17393e-10	3.17308e-09	1.80963e-09	SLC25A6/BCL2L1/RNF41/PINK1/AKT1/SLC25A5/PPIF/OPA1/PARL/SLC25A4	10	0.632456
BP	GO:0051604	protein maturation	20/198	314/18800	1.39583e-10	3.74513e-09	2.13588e-09	COMP/BAK1/CASP9/CASP7/FADD/CASP8/STUB1/XIAP/HTRA2/BAD/CASP3/RIPK2/PIDD1/CASP6/APAF1/CARD8/CASP2/GSN/CYCS/PARL	20	-0.447214
BP	GO:1902105	regulation of leukocyte differentiation	19/198	283/18800	1.69186e-10	4.50627e-09	2.56996e-09	FADD/CASP8/ESRRA/TNF/TLR3/FBXO7/TRAF6/AMBRA1/BAD/RNF41/SMAD7/RIPK1/TGFB1/RIPK2/FOXO3/MALT1/HAX1/TGFBR2/PPARGC1B	19	-0.688247
BP	GO:0070301	cellular response to hydrogen peroxide	12/198	90/18800	1.78095e-10	4.7092e-09	2.68569e-09	MAP3K5/RIPK3/CAT/RELA/PRKCD/PARK7/HDAC6/PINK1/BECN1/PPIF/RIPK1/FOXO3	12	-1.1547
BP	GO:1900407	regulation of cellular response to oxidative stress	12/198	92/18800	2.3163e-10	6.08072e-09	3.46788e-09	MMP3/GFER/TNF/FBXO7/HTRA2/PARK7/HDAC6/HSPB1/PINK1/AKT1/RIPK1/FOXO3	12	-1.73205
BP	GO:0070482	response to oxygen levels	20/198	324/18800	2.43161e-10	6.33782e-09	3.61451e-09	BCL2/TNF/CAT/BMP2/FAS/STUB1/BAD/CFLAR/PTEN/CASP3/PINK1/AKT1/BECN1/APAF1/CAV1/FOXO3/TGFBR2/FOXO1/IL1A/MMP2	20	-0.447214
BP	GO:0031334	positive regulation of protein-containing complex assembly	16/198	194/18800	2.46288e-10	6.36181e-09	3.62819e-09	MMP1/BAK1/DDX3X/MMP3/TNF/BID/HSP90AA1/VCP/STUB1/AMBRA1/SUMO1/PARK7/PINK1/TGFB1/CTTN/BAX	16	-2.5
BP	GO:0071216	cellular response to biotic stimulus	18/198	256/18800	2.47568e-10	6.36181e-09	3.62819e-09	BCL10/TICAM1/GFER/TNF/TRAF6/RELA/PPP1R15B/TNFRSF1B/NOD2/MAPK1/AKT1/TGFB1/RIPK2/APAF1/MAPK3/CARD8/MALT1/IL1A	18	-0.471405
BP	GO:0032103	positive regulation of response to external stimulus	23/198	442/18800	3.02981e-10	7.73132e-09	4.40923e-09	FADD/TNF/TNFRSF1A/HSP90AA1/TLR3/IKBKB/TRAF6/PARK7/BMPR2/TRADD/HSPB1/NOD2/MAPK1/MAP3K7/RIPK1/TGFB1/RIPK2/OPTN/CASP6/MAPK3/NOD1/DNM1L/MMP12	23	-0.625543
BP	GO:0032496	response to lipopolysaccharide	20/198	333/18800	3.93828e-10	9.97971e-09	5.6915e-09	CASP9/BCL10/TICAM1/CASP8/GFER/TNF/TAB2/TRAF6/RELA/TNFRSF1B/CASP3/NOD2/MAPK1/AKT1/TGFB1/RIPK2/MAPK3/CARD8/MALT1/IL1A	20	-1.34164
BP	GO:0031647	regulation of protein stability	19/198	300/18800	4.54622e-10	1.14408e-08	6.52477e-09	BCL2/HSP90AA1/BMP2/STUB1/FBXO7/PRKCD/SUMO1/PARK7/HDAC6/SMAD7/PTEN/CASP3/MAPK1/PINK1/USP4/TARDBP/USP2/GSN/TOMM7	19	-2.06474
BP	GO:0002718	regulation of cytokine production involved in immune response	12/198	98/18800	4.90818e-10	1.22671e-08	6.99602e-09	BCL10/TICAM1/TNF/TLR3/TRAF6/SMAD7/TNFRSF1B/NOD2/MAP3K7/TGFB1/TRAF2/MALT1	12	-1.1547
BP	GO:1902686	mitochondrial outer membrane permeabilization involved in programmed cell death	9/198	43/18800	5.49955e-10	1.36516e-08	7.78561e-09	SLC25A6/BID/RHOT2/SLC25A5/PPIF/VDAC2/RHOT1/BAX/SLC25A4	9	1
BP	GO:0002224	toll-like receptor signaling pathway	13/198	123/18800	5.88849e-10	1.45183e-08	8.2799e-09	BCL10/TICAM1/DDX3X/TNF/CD40/TLR3/TRAF6/NOD2/MAP3K7/RIPK2/CAV1/TRAF3/BIRC3	13	-0.83205
BP	GO:0002367	cytokine production involved in immune response	12/198	100/18800	6.2314e-10	1.52607e-08	8.70327e-09	BCL10/TICAM1/TNF/TLR3/TRAF6/SMAD7/TNFRSF1B/NOD2/MAP3K7/TGFB1/TRAF2/MALT1	12	-1.1547
BP	GO:0030198	extracellular matrix organization	19/198	307/18800	6.69908e-10	1.62966e-08	9.2941e-09	COMP/MMP1/ADAMTS4/MMP3/LUM/TNF/TNFRSF1A/TGFBR1/BMP2/CFLAR/TNFRSF1B/TGFB1/ADAMTS1/CAV1/MMP9/FMOD/MMP13/MMP2/MMP12	19	-0.688247
BP	GO:0008630	intrinsic apoptotic signaling pathway in response to DNA damage	12/198	101/18800	7.00702e-10	1.68215e-08	9.59341e-09	BAK1/BCL2/CASP9/TNF/TNFRSF1A/BID/BCL2L1/HTRA2/BAD/TNFRSF1B/CASP2/BAX	12	-2.3094
BP	GO:1902882	regulation of response to oxidative stress	12/198	101/18800	7.00702e-10	1.68215e-08	9.59341e-09	MMP3/GFER/TNF/FBXO7/HTRA2/PARK7/HDAC6/HSPB1/PINK1/AKT1/RIPK1/FOXO3	12	-1.73205
BP	GO:0043062	extracellular structure organization	19/198	308/18800	7.07441e-10	1.68722e-08	9.62236e-09	COMP/MMP1/ADAMTS4/MMP3/LUM/TNF/TNFRSF1A/TGFBR1/BMP2/CFLAR/TNFRSF1B/TGFB1/ADAMTS1/CAV1/MMP9/FMOD/MMP13/MMP2/MMP12	19	-0.688247
BP	GO:2001244	positive regulation of intrinsic apoptotic signaling pathway	10/198	61/18800	7.56234e-10	1.79188e-08	1.02192e-08	RIPK3/BID/UBB/BAD/PARK7/BECN1/CAV1/FIS1/DNM1L/BAX	10	0
BP	GO:0045229	external encapsulating structure organization	19/198	310/18800	7.88429e-10	1.85611e-08	1.05856e-08	COMP/MMP1/ADAMTS4/MMP3/LUM/TNF/TNFRSF1A/TGFBR1/BMP2/CFLAR/TNFRSF1B/TGFB1/ADAMTS1/CAV1/MMP9/FMOD/MMP13/MMP2/MMP12	19	-0.688247
BP	GO:0002831	regulation of response to biotic stimulus	20/198	351/18800	9.869e-10	2.29376e-08	1.30815e-08	FADD/CASP8/GFER/HSP90AA1/IKBKB/TRAF6/XIAP/NOD2/MAP3K7/RIPK2/OPTN/CASP6/MAPK3/CARD8/TRAF3/NOD1/SYT11/HTRA1/BIRC3/MMP12	20	0.894427
BP	GO:0010038	response to metal ion	20/198	351/18800	9.869e-10	2.29376e-08	1.30815e-08	BCL2/CASP9/CASP8/CAT/CHUK/BAD/SUMO1/PARK7/CASP3/MAPK1/AKT1/BECN1/PPIF/MAPK3/CAV1/PPP2CA/PKD2/SYT11/MMP9/IL1A	20	0
BP	GO:0035794	positive regulation of mitochondrial membrane permeability	9/198	46/18800	1.04556e-09	2.41472e-08	1.37713e-08	SLC25A6/BID/RHOT2/SLC25A5/PPIF/VDAC2/RHOT1/BAX/SLC25A4	9	1
BP	GO:0048732	gland development	22/198	431/18800	1.08466e-09	2.48925e-08	1.41964e-08	BCL2/FADD/RIPK3/GFER/TNF/TGFBR1/BMP2/RELA/CFLAR/PTEN/MAPK1/AKT1/RAF1/TGFB1/BMPR1A/MAPK3/CAV1/PKD2/TGFBR2/BAX/MMP2/TNC	22	0
BP	GO:0002237	response to molecule of bacterial origin	20/198	354/18800	1.14379e-09	2.60855e-08	1.48768e-08	CASP9/BCL10/TICAM1/CASP8/GFER/TNF/TAB2/TRAF6/RELA/TNFRSF1B/CASP3/NOD2/MAPK1/AKT1/TGFB1/RIPK2/MAPK3/CARD8/MALT1/IL1A	20	-1.34164
BP	GO:0048608	reproductive structure development	22/198	433/18800	1.18227e-09	2.67956e-08	1.52818e-08	BAK1/BCL2/CASP8/TGFBR1/BCL2L1/UBB/TLR3/BIRC6/BMPR2/PTEN/CASP3/MAPK1/AKT1/ADAMTS1/PKD2/FOXO3/CASP2/HTRA1/IL1A/BAX/MMP2/TNC	22	-0.426401
BP	GO:1902107	positive regulation of leukocyte differentiation	14/198	157/18800	1.21684e-09	2.72408e-08	1.55356e-08	FADD/CASP8/TNF/TRAF6/AMBRA1/BAD/RIPK1/TGFB1/RIPK2/FOXO3/MALT1/HAX1/TGFBR2/PPARGC1B	14	0.534522
BP	GO:1903708	positive regulation of hemopoiesis	14/198	157/18800	1.21684e-09	2.72408e-08	1.55356e-08	FADD/CASP8/TNF/TRAF6/AMBRA1/BAD/RIPK1/TGFB1/RIPK2/FOXO3/MALT1/HAX1/TGFBR2/PPARGC1B	14	0.534522
BP	GO:0071222	cellular response to lipopolysaccharide	16/198	217/18800	1.28293e-09	2.85452e-08	1.62795e-08	BCL10/TICAM1/GFER/TNF/TRAF6/RELA/TNFRSF1B/NOD2/MAPK1/AKT1/TGFB1/RIPK2/MAPK3/CARD8/MALT1/IL1A	16	-0.5
BP	GO:0007252	I-kappaB phosphorylation	7/198	21/18800	1.32645e-09	2.93346e-08	1.67297e-08	TNF/CHUK/TLR3/IKBKB/AKT1/MAP3K7/TRAF2	7	-0.377964
BP	GO:0061458	reproductive system development	22/198	436/18800	1.34416e-09	2.95472e-08	1.6851e-08	BAK1/BCL2/CASP8/TGFBR1/BCL2L1/UBB/TLR3/BIRC6/BMPR2/PTEN/CASP3/MAPK1/AKT1/ADAMTS1/PKD2/FOXO3/CASP2/HTRA1/IL1A/BAX/MMP2/TNC	22	-0.426401
BP	GO:2000045	regulation of G1/S transition of mitotic cell cycle	14/198	160/18800	1.56081e-09	3.41042e-08	1.94499e-08	BCL2/DDX3X/BID/FBXO7/AMBRA1/PTEN/AKT1/ADAMTS1/PIDD1/CRADD/UBE2E2/PPP2CA/PKD2/CASP2	14	0.534522
BP	GO:0071887	leukocyte apoptotic process	12/198	109/18800	1.71165e-09	3.71774e-08	2.12026e-08	BAK1/CASP9/FADD/RIPK3/BCL10/FAS/PTEN/CASP3/NOD2/AKT1/RIPK1/BAX	12	-1.73205
BP	GO:0031349	positive regulation of defense response	18/198	289/18800	1.7421e-09	3.76149e-08	2.14521e-08	FADD/TNF/TNFRSF1A/HSP90AA1/TLR3/IKBKB/TRAF6/PARK7/TRADD/NOD2/MAP3K7/RIPK1/RIPK2/OPTN/CASP6/MAPK3/NOD1/MMP12	18	-0.471405
BP	GO:1901216	positive regulation of neuron death	11/198	87/18800	1.86619e-09	4.00572e-08	2.28449e-08	CASP9/MAP3K5/CASP8/TNF/BAD/CASP3/AIMP2/FOXO3/MAP2K7/CASP2/BAX	11	-0.301511
BP	GO:0098792	xenophagy	6/198	13/18800	2.0416e-09	4.33128e-08	2.47016e-08	CALCOCO2/NOD2/RIPK2/OPTN/MAPK3/NOD1	6	0.816497
BP	GO:1903599	positive regulation of autophagy of mitochondrion	6/198	13/18800	2.0416e-09	4.33128e-08	2.47016e-08	FBXO7/AMBRA1/PARK7/SLC25A5/VDAC1/SLC25A4	6	0
BP	GO:0051646	mitochondrion localization	9/198	50/18800	2.29295e-09	4.8086e-08	2.74238e-08	UBB/MFN2/RHOT2/HDAC6/LRPPRC/RHOT1/MFN1/OPA1/DNM1L	9	0.333333
BP	GO:2001238	positive regulation of extrinsic apoptotic signaling pathway	9/198	50/18800	2.29295e-09	4.8086e-08	2.74238e-08	FADD/BCL10/TNF/BID/HTRA2/PTEN/RIPK1/TRAF2/CAV1	9	-1
BP	GO:0097345	mitochondrial outer membrane permeabilization	8/198	35/18800	2.4236e-09	5.05355e-08	2.88208e-08	SLC25A6/BID/RHOT2/SLC25A5/VDAC2/RHOT1/BAX/SLC25A4	8	0.707107
BP	GO:1905710	positive regulation of membrane permeability	9/198	51/18800	2.75914e-09	5.72051e-08	3.26245e-08	SLC25A6/BID/RHOT2/SLC25A5/PPIF/VDAC2/RHOT1/BAX/SLC25A4	9	1
BP	GO:0071219	cellular response to molecule of bacterial origin	16/198	229/18800	2.8024e-09	5.77737e-08	3.29488e-08	BCL10/TICAM1/GFER/TNF/TRAF6/RELA/TNFRSF1B/NOD2/MAPK1/AKT1/TGFB1/RIPK2/MAPK3/CARD8/MALT1/IL1A	16	-0.5
BP	GO:0036293	response to decreased oxygen levels	18/198	299/18800	2.98646e-09	6.12225e-08	3.49157e-08	BCL2/TNF/CAT/BMP2/STUB1/BAD/CFLAR/PTEN/CASP3/PINK1/AKT1/BECN1/APAF1/CAV1/FOXO3/TGFBR2/IL1A/MMP2	18	-0.471405
BP	GO:1904923	regulation of autophagy of mitochondrion in response to mitochondrial depolarization	6/198	14/18800	3.54155e-09	7.21962e-08	4.1174e-08	HTRA2/MFN2/HDAC6/PINK1/OPTN/TOMM7	6	-0.816497
BP	GO:1904019	epithelial cell apoptotic process	12/198	118/18800	4.29099e-09	8.6988e-08	4.96099e-08	MAP3K5/TNF/BID/BCL2L1/CD40/BAD/CFLAR/BMPR2/CASP6/FOXO3/GSN/TGFBR2	12	-1.1547
BP	GO:0090200	positive regulation of release of cytochrome c from mitochondria	7/198	26/18800	7.17648e-09	1.44679e-07	8.25118e-08	BID/BAD/PINK1/PPIF/MMP9/DNM1L/BAX	7	0.377964
BP	GO:0043405	regulation of MAP kinase activity	14/198	183/18800	8.93246e-09	1.79091e-07	1.02137e-07	MAP3K5/TNF/CD40/BMP2/TRAF6/PRKCD/TAB1/NOD2/MAP3K7/TGFB1/TRAF2/MAGED1/CAV1/MAP2K7	14	-0.534522
BP	GO:1902110	positive regulation of mitochondrial membrane permeability involved in apoptotic process	8/198	41/18800	9.32132e-09	1.85866e-07	1.06001e-07	SLC25A6/BID/RHOT2/SLC25A5/VDAC2/RHOT1/BAX/SLC25A4	8	0.707107
BP	GO:0001666	response to hypoxia	17/198	286/18800	1.01041e-08	2.0038e-07	1.14279e-07	BCL2/TNF/CAT/BMP2/STUB1/BAD/CFLAR/PTEN/CASP3/PINK1/BECN1/APAF1/CAV1/FOXO3/TGFBR2/IL1A/MMP2	17	-0.727607
BP	GO:1902806	regulation of cell cycle G1/S phase transition	14/198	188/18800	1.26168e-08	2.48857e-07	1.41925e-07	BCL2/DDX3X/BID/FBXO7/AMBRA1/PTEN/AKT1/ADAMTS1/PIDD1/CRADD/UBE2E2/PPP2CA/PKD2/CASP2	14	0.534522
BP	GO:0008053	mitochondrial fusion	7/198	28/18800	1.26894e-08	2.48944e-07	1.41974e-07	BAK1/MFN2/MFN1/OPA1/FIS1/BAX/PARL	7	1.13389
BP	GO:0007178	transmembrane receptor protein serine/threonine kinase signaling pathway	19/198	368/18800	1.31923e-08	2.5617e-07	1.46095e-07	COMP/TGFBR1/UBE2D1/BMP2/UBE2D3/STUB1/XIAP/BMPR2/SMAD7/TAB1/MAP3K7/TGFB1/BMPR1A/MAPK3/CAV1/HTRA1/TGFBR2/FMOD/HTRA3	19	-0.229416
BP	GO:0071241	cellular response to inorganic substance	15/198	221/18800	1.31981e-08	2.5617e-07	1.46095e-07	MMP3/CHUK/BAD/SUMO1/CFLAR/MAPK1/AKT1/BECN1/PPIF/TRAF2/MAPK3/PKD2/SYT11/MMP9/FOXO1	15	0.774597
BP	GO:2001267	regulation of cysteine-type endopeptidase activity involved in apoptotic signaling pathway	6/198	17/18800	1.42159e-08	2.74464e-07	1.56529e-07	FAS/HTRA2/PARK7/GSN/MMP9/BAX	6	0
BP	GO:0034976	response to endoplasmic reticulum stress	16/198	257/18800	1.45627e-08	2.7968e-07	1.59504e-07	BAK1/BCL2/MAP3K5/DDX3X/BCL2L1/VCP/STUB1/UBE2G2/PARK7/PPP1R15B/TRAF2/APAF1/CAV1/ATXN3/OPA1/BAX	16	-1
BP	GO:0035966	response to topologically incorrect protein	13/198	160/18800	1.49625e-08	2.85711e-07	1.62943e-07	COMP/BAK1/HSP90AA1/VCP/STUB1/MFN2/PPP1R15B/HDAC6/HSPB1/OPTN/ATXN3/HSPA4/BAX	13	-1.38675
BP	GO:1903706	regulation of hemopoiesis	19/198	371/18800	1.50333e-08	2.85711e-07	1.62943e-07	FADD/CASP8/ESRRA/TNF/TLR3/FBXO7/TRAF6/AMBRA1/BAD/RNF41/SMAD7/RIPK1/TGFB1/RIPK2/FOXO3/MALT1/HAX1/TGFBR2/PPARGC1B	19	-0.688247
BP	GO:0051341	regulation of oxidoreductase activity	11/198	106/18800	1.55686e-08	2.94352e-07	1.67871e-07	RIPK3/TNF/FDX1/PARK7/HDAC6/NOD2/AKT1/CAV1/NOD1/IL1A/NDUFA4	11	-0.301511
BP	GO:0032757	positive regulation of interleukin-8 production	9/198	62/18800	1.66508e-08	3.13189e-07	1.78614e-07	FADD/BCL10/TNF/TLR3/RELA/PARK7/NOD2/RIPK1/NOD1	9	-1.66667
BP	GO:0070059	intrinsic apoptotic signaling pathway in response to endoplasmic reticulum stress	9/198	63/18800	1.92505e-08	3.60231e-07	2.05443e-07	BAK1/BCL2/MAP3K5/BCL2L1/PARK7/TRAF2/APAF1/OPA1/BAX	9	-0.333333
BP	GO:0008631	intrinsic apoptotic signaling pathway in response to oxidative stress	8/198	45/18800	2.02845e-08	3.77643e-07	2.15373e-07	BCL2/MAP3K5/PRKCD/HTRA2/PARK7/HSPB1/PINK1/AKT1	8	-2.12132
BP	GO:2000117	negative regulation of cysteine-type endopeptidase activity	10/198	85/18800	2.10832e-08	3.9052e-07	2.22717e-07	DDX3X/TNF/XIAP/PARK7/AKT1/RAF1/CARD8/MMP9/BIRC5/BIRC3	10	0.632456
BP	GO:0002700	regulation of production of molecular mediator of immune response	13/198	167/18800	2.50148e-08	4.61006e-07	2.62915e-07	BCL10/TICAM1/TNF/CD40/TLR3/TRAF6/SMAD7/TNFRSF1B/NOD2/MAP3K7/TGFB1/TRAF2/MALT1	13	-1.38675
BP	GO:0002260	lymphocyte homeostasis	9/198	65/18800	2.55333e-08	4.68196e-07	2.67016e-07	BAK1/BCL2/FADD/RIPK3/BCL10/FAS/CASP3/AKT1/BAX	9	-1.66667
BP	GO:0033002	muscle cell proliferation	15/198	233/18800	2.68015e-08	4.88994e-07	2.78877e-07	MAP3K5/TNF/TGFBR1/BMP2/MFN2/CFLAR/BMPR2/PTEN/AKT1/TGFB1/ADAMTS1/BMPR1A/MMP9/TGFBR2/MMP2	15	-0.258199
BP	GO:2000378	negative regulation of reactive oxygen species metabolic process	8/198	47/18800	2.90636e-08	5.27628e-07	3.0091e-07	BCL2/MMP3/PARK7/HDAC6/CFLAR/SIRT5/PINK1/BECN1	8	-2.12132
BP	GO:0060546	negative regulation of necroptotic process	6/198	19/18800	3.0623e-08	5.53185e-07	3.15486e-07	FADD/CASP8/RIPK1/CAV1/BIRC3/SLC25A4	6	0.816497
BP	GO:0048660	regulation of smooth muscle cell proliferation	13/198	170/18800	3.09402e-08	5.56162e-07	3.17183e-07	MAP3K5/TNF/BMP2/MFN2/BMPR2/PTEN/AKT1/TGFB1/ADAMTS1/BMPR1A/MMP9/TGFBR2/MMP2	13	0.27735
BP	GO:0002703	regulation of leukocyte mediated immunity	15/198	236/18800	3.17774e-08	5.68411e-07	3.24169e-07	FADD/RIPK3/TICAM1/GFER/TNF/CD40/TLR3/TRAF6/SMAD7/TNFRSF1B/NOD2/MAP3K7/TGFB1/TRAF2/MALT1	15	-1.80739
BP	GO:1902108	regulation of mitochondrial membrane permeability involved in apoptotic process	8/198	48/18800	3.45638e-08	6.15235e-07	3.50873e-07	SLC25A6/BID/RHOT2/SLC25A5/VDAC2/RHOT1/BAX/SLC25A4	8	0.707107
BP	GO:0002822	regulation of adaptive immune response based on somatic recombination of immune receptors built from immunoglobulin superfamily domains	13/198	173/18800	3.81028e-08	6.71677e-07	3.83062e-07	FADD/RIPK3/TNF/CD40/TRAF6/SMAD7/TNFRSF1B/NOD2/MAP3K7/TGFB1/TRAF2/RIPK2/MALT1	13	-0.83205
BP	GO:0048659	smooth muscle cell proliferation	13/198	173/18800	3.81028e-08	6.71677e-07	3.83062e-07	MAP3K5/TNF/BMP2/MFN2/BMPR2/PTEN/AKT1/TGFB1/ADAMTS1/BMPR1A/MMP9/TGFBR2/MMP2	13	0.27735
BP	GO:0043406	positive regulation of MAP kinase activity	11/198	116/18800	4.01742e-08	7.04786e-07	4.01945e-07	MAP3K5/TNF/CD40/TRAF6/TAB1/NOD2/MAP3K7/TGFB1/TRAF2/MAGED1/MAP2K7	11	-0.301511
BP	GO:0062099	negative regulation of programmed necrotic cell death	6/198	20/18800	4.33648e-08	7.53515e-07	4.29735e-07	FADD/CASP8/RIPK1/CAV1/BIRC3/SLC25A4	6	0.816497
BP	GO:1903209	positive regulation of oxidative stress-induced cell death	6/198	20/18800	4.33648e-08	7.53515e-07	4.29735e-07	MMP3/TNF/PARK7/HDAC6/RIPK1/FOXO3	6	-0.816497
BP	GO:0002706	regulation of lymphocyte mediated immunity	13/198	175/18800	4.36745e-08	7.553e-07	4.30753e-07	FADD/RIPK3/GFER/TNF/CD40/TRAF6/SMAD7/TNFRSF1B/NOD2/MAP3K7/TGFB1/TRAF2/MALT1	13	-1.38675
BP	GO:0070231	T cell apoptotic process	8/198	50/18800	4.82986e-08	8.31328e-07	4.74113e-07	BAK1/FADD/RIPK3/BCL10/FAS/AKT1/RIPK1/BAX	8	-0.707107
BP	GO:1903039	positive regulation of leukocyte cell-cell adhesion	15/198	245/18800	5.21667e-08	8.93691e-07	5.09679e-07	FADD/BCL10/TNF/TRAF6/AMBRA1/RELA/BAD/NOD2/AKT1/RIPK2/CAV1/FOXO3/MALT1/TGFBR2/IL1A	15	-0.258199
BP	GO:0010918	positive regulation of mitochondrial membrane potential	5/198	11/18800	5.40661e-08	9.21902e-07	5.25768e-07	BID/VCP/BAD/AKT1/MFN1	5	-0.447214
BP	GO:0048661	positive regulation of smooth muscle cell proliferation	10/198	95/18800	6.21528e-08	1.05486e-06	6.01597e-07	MAP3K5/TNF/MFN2/AKT1/TGFB1/ADAMTS1/BMPR1A/MMP9/TGFBR2/MMP2	10	1.26491
BP	GO:0071560	cellular response to transforming growth factor beta stimulus	15/198	252/18800	7.55687e-08	1.27662e-06	7.28067e-07	TGFBR1/BMP2/STUB1/CFLAR/SMAD7/TAB1/MAP3K7/TGFB1/APAF1/BMPR1A/CAV1/HTRA1/TGFBR2/FMOD/HTRA3	15	0.774597
BP	GO:0002931	response to ischemia	8/198	53/18800	7.7611e-08	1.30508e-06	7.44298e-07	BCL2/CASP9/MAP3K5/SQSTM1/STUB1/PINK1/PPIF/CAV1	8	-1.41421
BP	GO:0051607	defense response to virus	16/198	290/18800	7.85093e-08	1.31413e-06	7.49459e-07	BCL2/FADD/RIPK3/TICAM1/BCL2L1/HSP90AA1/CD40/TLR3/RELA/BECN1/CARD8/TRAF3/HTRA1/MAP3K14/BIRC3/MMP12	16	-0.5
BP	GO:0022407	regulation of cell-cell adhesion	20/198	456/18800	8.04883e-08	1.3411e-06	7.64842e-07	FADD/BCL10/TNF/BMP2/TRAF6/AMBRA1/RELA/PRKCD/BAD/SMAD7/CASP3/NOD2/AKT1/TGFB1/RIPK2/CAV1/FOXO3/MALT1/TGFBR2/IL1A	20	-0.894427
BP	GO:0022409	positive regulation of cell-cell adhesion	16/198	291/18800	8.23168e-08	1.35916e-06	7.75139e-07	FADD/BCL10/TNF/TRAF6/AMBRA1/RELA/BAD/SMAD7/NOD2/AKT1/RIPK2/CAV1/FOXO3/MALT1/TGFBR2/IL1A	16	-0.5
BP	GO:0140546	defense response to symbiont	16/198	291/18800	8.23168e-08	1.35916e-06	7.75139e-07	BCL2/FADD/RIPK3/TICAM1/BCL2L1/HSP90AA1/CD40/TLR3/RELA/BECN1/CARD8/TRAF3/HTRA1/MAP3K14/BIRC3/MMP12	16	-0.5
BP	GO:0070227	lymphocyte apoptotic process	9/198	75/18800	9.16235e-08	1.50366e-06	8.57548e-07	BAK1/FADD/RIPK3/BCL10/FAS/PTEN/AKT1/RIPK1/BAX	9	-1
BP	GO:1901524	regulation of mitophagy	5/198	12/18800	9.18925e-08	1.50366e-06	8.57548e-07	AMBRA1/RNF41/SLC25A5/VDAC1/SLC25A4	5	0.447214
BP	GO:0002819	regulation of adaptive immune response	13/198	188/18800	1.01621e-07	1.65543e-06	9.44103e-07	FADD/RIPK3/TNF/CD40/TRAF6/SMAD7/TNFRSF1B/NOD2/MAP3K7/TGFB1/TRAF2/RIPK2/MALT1	13	-0.83205
BP	GO:0071559	response to transforming growth factor beta	15/198	258/18800	1.02813e-07	1.6674e-06	9.50929e-07	TGFBR1/BMP2/STUB1/CFLAR/SMAD7/TAB1/MAP3K7/TGFB1/APAF1/BMPR1A/CAV1/HTRA1/TGFBR2/FMOD/HTRA3	15	0.774597
BP	GO:0002763	positive regulation of myeloid leukocyte differentiation	8/198	55/18800	1.04715e-07	1.69073e-06	9.64233e-07	FADD/CASP8/TNF/TRAF6/RIPK1/TGFB1/HAX1/PPARGC1B	8	0
BP	GO:0001503	ossification	19/198	420/18800	1.07038e-07	1.72062e-06	9.81281e-07	COMP/BCL2/ESRRA/TNF/CAT/BMP2/TRAF6/BMPR2/SMAD7/MAPK1/AKT1/TGFB1/BMPR1A/MAPK3/MMP9/PPARGC1B/MMP13/MMP2/TNC	19	-0.229416
BP	GO:0033157	regulation of intracellular protein transport	14/198	224/18800	1.14256e-07	1.8286e-06	1.04287e-06	UBE2D3/PRKCD/HTRA2/UBE2G2/SUMO1/PARK7/UBE2L3/PINK1/TARDBP/TGFB1/HAX1/FIS1/TOMM7/PARL	14	-0.534522
BP	GO:0043154	negative regulation of cysteine-type endopeptidase activity involved in apoptotic process	9/198	77/18800	1.15573e-07	1.84159e-06	1.05027e-06	DDX3X/TNF/XIAP/PARK7/AKT1/RAF1/MMP9/BIRC5/BIRC3	9	0.333333
BP	GO:0000082	G1/S transition of mitotic cell cycle	14/198	225/18800	1.20723e-07	1.91253e-06	1.09073e-06	BCL2/DDX3X/BID/FBXO7/AMBRA1/PTEN/AKT1/ADAMTS1/PIDD1/CRADD/UBE2E2/PPP2CA/PKD2/CASP2	14	0.534522
BP	GO:0051438	regulation of ubiquitin-protein transferase activity	8/198	56/18800	1.21073e-07	1.91253e-06	1.09073e-06	STUB1/PARK7/UBE2N/SMAD7/PTEN/UBE2L3/PINK1/DNM1L	8	-2.12132
BP	GO:0032677	regulation of interleukin-8 production	10/198	102/18800	1.22921e-07	1.93336e-06	1.10261e-06	FADD/BCL10/TNF/TLR3/RELA/PARK7/OTUD7B/NOD2/RIPK1/NOD1	10	-1.89737
BP	GO:0032637	interleukin-8 production	10/198	103/18800	1.34904e-07	2.11273e-06	1.2049e-06	FADD/BCL10/TNF/TLR3/RELA/PARK7/OTUD7B/NOD2/RIPK1/NOD1	10	-1.89737
BP	GO:0050863	regulation of T cell activation	17/198	342/18800	1.36864e-07	2.13426e-06	1.21718e-06	FADD/RIPK3/BCL10/TRAF6/AMBRA1/BAD/SMAD7/TNFRSF1B/CASP3/NOD2/AKT1/RIPK2/CAV1/FOXO3/MALT1/TGFBR2/IL1A	17	-0.727607
BP	GO:0010803	regulation of tumor necrosis factor-mediated signaling pathway	8/198	57/18800	1.39578e-07	2.16732e-06	1.23604e-06	CASP8/TNFRSF1A/IKBKB/XIAP/RIPK1/TRAF2/CARD8/SHARPIN	8	0
BP	GO:0060547	negative regulation of necrotic cell death	6/198	24/18800	1.45392e-07	2.24803e-06	1.28207e-06	FADD/CASP8/RIPK1/CAV1/BIRC3/SLC25A4	6	0.816497
BP	GO:1904925	positive regulation of autophagy of mitochondrion in response to mitochondrial depolarization	5/198	13/18800	1.48049e-07	2.27946e-06	1.29999e-06	MFN2/HDAC6/PINK1/OPTN/TOMM7	5	-0.447214
BP	GO:1903037	regulation of leukocyte cell-cell adhesion	17/198	344/18800	1.48728e-07	2.28028e-06	1.30046e-06	FADD/BCL10/TNF/TRAF6/AMBRA1/RELA/BAD/SMAD7/CASP3/NOD2/AKT1/RIPK2/CAV1/FOXO3/MALT1/TGFBR2/IL1A	17	-0.727607
BP	GO:0043029	T cell homeostasis	7/198	39/18800	1.49449e-07	2.28175e-06	1.3013e-06	BCL2/FADD/RIPK3/FAS/CASP3/AKT1/BAX	7	-1.13389
BP	GO:0030509	BMP signaling pathway	12/198	162/18800	1.50971e-07	2.29539e-06	1.30908e-06	COMP/UBE2D1/BMP2/UBE2D3/XIAP/BMPR2/SMAD7/TGFB1/BMPR1A/MAPK3/HTRA1/HTRA3	12	-0.57735
BP	GO:0007568	aging	12/198	163/18800	1.61482e-07	2.44501e-06	1.39441e-06	COMP/BAK1/CASP9/CAT/HTRA2/TNFRSF1B/BECN1/APAF1/FOXO3/CASP2/TGFBR2/MMP2	12	0
BP	GO:0043393	regulation of protein binding	13/198	196/18800	1.65217e-07	2.49123e-06	1.42077e-06	TICAM1/TGFBR1/BMP2/STUB1/PRKCD/PARK7/AKT1/RIPK2/MAPK3/CAV1/PPP2CA/MMP9/BAX	13	0.27735
BP	GO:0051353	positive regulation of oxidoreductase activity	8/198	59/18800	1.83968e-07	2.76256e-06	1.57551e-06	RIPK3/TNF/FDX1/PARK7/NOD2/AKT1/NOD1/NDUFA4	8	-0.707107
BP	GO:0070423	nucleotide-binding oligomerization domain containing signaling pathway	6/198	25/18800	1.89634e-07	2.83596e-06	1.61737e-06	XIAP/RELA/NOD2/MAP3K7/RIPK2/BIRC3	6	0
BP	GO:1903557	positive regulation of tumor necrosis factor superfamily cytokine production	10/198	107/18800	1.9374e-07	2.88555e-06	1.64565e-06	FADD/BCL10/TICAM1/TLR3/HSPB1/NOD2/RIPK1/RIPK2/NOD1/IL1A	10	-0.632456
BP	GO:0009416	response to light stimulus	16/198	310/18800	1.95204e-07	2.89552e-06	1.65134e-06	MMP1/BAK1/BCL2/CASP9/CASP7/MMP3/CAT/RELA/PRKCD/CASP3/AKT1/MAP2K7/USP2/MMP9/BAX/MMP2	16	-1
BP	GO:0001959	regulation of cytokine-mediated signaling pathway	12/198	166/18800	1.97045e-07	2.911e-06	1.66016e-06	FADD/CASP8/TNFRSF1A/IKBKB/XIAP/RIPK1/TRAF2/RIPK2/CAV1/CARD8/SHARPIN/MMP12	12	0.57735
BP	GO:0009314	response to radiation	19/198	438/18800	2.0489e-07	3.01469e-06	1.7193e-06	MMP1/BAK1/BCL2/CASP9/CASP7/MMP3/TNF/BCL2L1/CAT/RELA/PRKCD/CASP3/AKT1/MAP2K7/USP2/MMP9/IL1A/BAX/MMP2	19	-1.14708
BP	GO:0001655	urogenital system development	17/198	352/18800	2.06165e-07	3.02127e-06	1.72305e-06	BCL2/CASP9/FADD/TGFBR1/CAT/BMP2/CFLAR/SMAD7/PTEN/ADAMTS1/APAF1/MAGED1/PKD2/MMP9/BAX/MMP2/TNC	17	-0.242536
BP	GO:0007179	transforming growth factor beta receptor signaling pathway	13/198	200/18800	2.08824e-07	3.04799e-06	1.73829e-06	TGFBR1/BMP2/STUB1/SMAD7/TAB1/MAP3K7/TGFB1/BMPR1A/CAV1/HTRA1/TGFBR2/FMOD/HTRA3	13	0.83205
BP	GO:0042176	regulation of protein catabolic process	18/198	395/18800	2.11311e-07	3.07201e-06	1.75199e-06	TNF/HSP90AA1/VCP/UBB/STUB1/RELA/SUMO1/PARK7/RNF41/SMAD7/PTEN/TNFRSF1B/PINK1/AKT1/CAV1/COMMD1/ATXN3/FOXO1	18	-1.88562
BP	GO:0002697	regulation of immune effector process	17/198	353/18800	2.14614e-07	3.10764e-06	1.77231e-06	FADD/RIPK3/BCL10/TICAM1/GFER/TNF/CD40/TLR3/TRAF6/SMAD7/TNFRSF1B/NOD2/MAP3K7/TGFB1/TRAF2/RIPK2/MALT1	17	-1.69775
BP	GO:0045936	negative regulation of phosphate metabolic process	19/198	440/18800	2.19751e-07	3.16945e-06	1.80756e-06	BAK1/TNF/BMP2/IKBKB/FBXO7/PRKCD/PARK7/PPP1R15B/HSPB1/SMAD7/PTEN/CASP3/AKT1/TARDBP/TGFB1/CAV1/PPP2CA/COX11/BAX	19	-1.14708
BP	GO:0010563	negative regulation of phosphorus metabolic process	19/198	441/18800	2.27546e-07	3.26738e-06	1.86341e-06	BAK1/TNF/BMP2/IKBKB/FBXO7/PRKCD/PARK7/PPP1R15B/HSPB1/SMAD7/PTEN/CASP3/AKT1/TARDBP/TGFB1/CAV1/PPP2CA/COX11/BAX	19	-1.14708
BP	GO:0070141	response to UV-A	5/198	14/18800	2.28331e-07	3.26738e-06	1.86341e-06	MMP1/MMP3/AKT1/MMP9/MMP2	5	0.447214
BP	GO:0009408	response to heat	10/198	109/18800	2.30833e-07	3.29028e-06	1.87647e-06	HSP90AA1/VCP/STUB1/HTRA2/SUMO1/HSPB1/AKT1/ATXN3/MAP2K7/IL1A	10	-0.632456
BP	GO:0035306	positive regulation of dephosphorylation	8/198	61/18800	2.39956e-07	3.40701e-06	1.94304e-06	RIPK3/BMP2/AMBRA1/PRKCD/PPP1R15B/PINK1/TGFB1/PPARGC1B	8	-1.41421
BP	GO:0034643	establishment of mitochondrion localization, microtubule-mediated	6/198	26/18800	2.44371e-07	3.42966e-06	1.95596e-06	UBB/RHOT2/HDAC6/LRPPRC/RHOT1/OPA1	6	0
BP	GO:0035872	nucleotide-binding domain, leucine rich repeat containing receptor signaling pathway	6/198	26/18800	2.44371e-07	3.42966e-06	1.95596e-06	XIAP/RELA/NOD2/MAP3K7/RIPK2/BIRC3	6	0
BP	GO:0047497	mitochondrion transport along microtubule	6/198	26/18800	2.44371e-07	3.42966e-06	1.95596e-06	UBB/RHOT2/HDAC6/LRPPRC/RHOT1/OPA1	6	0
BP	GO:0002824	positive regulation of adaptive immune response based on somatic recombination of immune receptors built from immunoglobulin superfamily domains	10/198	110/18800	2.51615e-07	3.51779e-06	2.00622e-06	FADD/TNF/CD40/TRAF6/NOD2/MAP3K7/TGFB1/TRAF2/RIPK2/MALT1	10	0
BP	GO:0006986	response to unfolded protein	11/198	139/18800	2.5872e-07	3.60332e-06	2.055e-06	COMP/BAK1/HSP90AA1/VCP/STUB1/MFN2/PPP1R15B/HSPB1/OPTN/HSPA4/BAX	11	-1.50756
BP	GO:0006605	protein targeting	16/198	317/18800	2.63958e-07	3.65155e-06	2.08251e-06	BID/HSP90AA1/UBE2D3/FBXO7/HTRA2/TOMM22/MFN2/UBE2L3/PINK1/TOMM20/HSPA4/HAX1/FIS1/TOMM40/TOMM7/PARL	16	-0.5
BP	GO:1901652	response to peptide	20/198	491/18800	2.64185e-07	3.65155e-06	2.08251e-06	MMP3/GFER/ESRRA/TNF/CAT/RELA/PRKCD/CFLAR/NOD2/AKT1/RIPK2/CAV1/NOD1/FOXO3/CYC1/MMP9/FOXO1/MMP13/MMP2/MMP12	20	0.447214
BP	GO:0022617	extracellular matrix disassembly	8/198	62/18800	2.73039e-07	3.74556e-06	2.13612e-06	MMP1/ADAMTS4/MMP3/TGFB1/MMP9/MMP13/MMP2/MMP12	8	0.707107
BP	GO:0032731	positive regulation of interleukin-1 beta production	8/198	62/18800	2.73039e-07	3.74556e-06	2.13612e-06	CASP8/TNF/HSPB1/NOD2/RIPK2/CARD8/NOD1/MALT1	8	0
BP	GO:0071772	response to BMP	12/198	173/18800	3.0852e-07	4.2007e-06	2.39569e-06	COMP/UBE2D1/BMP2/UBE2D3/XIAP/BMPR2/SMAD7/TGFB1/BMPR1A/MAPK3/HTRA1/HTRA3	12	-0.57735
BP	GO:0071773	cellular response to BMP stimulus	12/198	173/18800	3.0852e-07	4.2007e-06	2.39569e-06	COMP/UBE2D1/BMP2/UBE2D3/XIAP/BMPR2/SMAD7/TGFB1/BMPR1A/MAPK3/HTRA1/HTRA3	12	-0.57735
BP	GO:1901215	negative regulation of neuron death	13/198	209/18800	3.46752e-07	4.70371e-06	2.68256e-06	BCL2/GFER/BCL2L1/FBXO7/IKBKG/HTRA2/PARK7/TNFRSF1B/PINK1/AKT1/TRAF2/NGF/BAX	13	-1.38675
BP	GO:0031638	zymogen activation	8/198	64/18800	3.51061e-07	4.74453e-06	2.70584e-06	BAK1/CASP9/FADD/CASP8/BAD/RIPK2/APAF1/CYCS	8	-0.707107
BP	GO:1903214	regulation of protein targeting to mitochondrion	7/198	44/18800	3.56131e-07	4.77421e-06	2.72277e-06	UBE2D3/HTRA2/UBE2L3/PINK1/HAX1/TOMM7/PARL	7	-0.377964
BP	GO:2001239	regulation of extrinsic apoptotic signaling pathway in absence of ligand	7/198	44/18800	3.56131e-07	4.77421e-06	2.72277e-06	BCL2/TNF/BCL2L1/HTRA2/AKT1/RIPK1/IL1A	7	-0.377964
BP	GO:0051098	regulation of binding	17/198	366/18800	3.57183e-07	4.77421e-06	2.72277e-06	TICAM1/TGFBR1/BMP2/STUB1/TRAF6/PRKCD/SUMO1/PARK7/AKT1/TGFB1/RIPK2/NGF/MAPK3/CAV1/PPP2CA/MMP9/BAX	17	0.242536
BP	GO:0017038	protein import	13/198	210/18800	3.66257e-07	4.87763e-06	2.78175e-06	SQSTM1/HSP90AA1/PRKCD/TOMM22/SUMO1/AKT1/TARDBP/TGFB1/TOMM20/HSPA4/TOMM40/TOMM7/MMP12	13	0.83205
BP	GO:0002709	regulation of T cell mediated immunity	9/198	88/18800	3.70492e-07	4.91609e-06	2.80368e-06	FADD/RIPK3/TRAF6/SMAD7/TNFRSF1B/NOD2/MAP3K7/TRAF2/MALT1	9	-1
BP	GO:0002821	positive regulation of adaptive immune response	10/198	115/18800	3.82124e-07	5.05207e-06	2.88123e-06	FADD/TNF/CD40/TRAF6/NOD2/MAP3K7/TGFB1/TRAF2/RIPK2/MALT1	10	0
BP	GO:0001776	leukocyte homeostasis	9/198	89/18800	4.08455e-07	5.3807e-06	3.06865e-06	BAK1/BCL2/FADD/RIPK3/BCL10/FAS/CASP3/AKT1/BAX	9	-1.66667
BP	GO:0048538	thymus development	7/198	45/18800	4.17998e-07	5.4866e-06	3.12905e-06	BCL2/FADD/RIPK3/TGFBR1/MAPK1/RAF1/MAPK3	7	-1.13389
BP	GO:0060759	regulation of response to cytokine stimulus	12/198	178/18800	4.19509e-07	5.4867e-06	3.12911e-06	FADD/CASP8/TNFRSF1A/IKBKB/XIAP/RIPK1/TRAF2/RIPK2/CAV1/CARD8/SHARPIN/MMP12	12	0.57735
BP	GO:0051251	positive regulation of lymphocyte activation	17/198	371/18800	4.31862e-07	5.62808e-06	3.20974e-06	BCL2/FADD/BCL10/TICAM1/CD40/TRAF6/AMBRA1/BAD/NOD2/AKT1/TGFB1/RIPK2/CAV1/FOXO3/MALT1/TGFBR2/IL1A	17	-0.242536
BP	GO:0002761	regulation of myeloid leukocyte differentiation	10/198	117/18800	4.49004e-07	5.83066e-06	3.32527e-06	FADD/CASP8/ESRRA/TNF/TLR3/TRAF6/RIPK1/TGFB1/HAX1/PPARGC1B	10	-0.632456
BP	GO:0070661	leukocyte proliferation	16/198	330/18800	4.52463e-07	5.85474e-06	3.339e-06	BCL2/FADD/RIPK3/TICAM1/CD40/TRAF6/PRKCD/TNFRSF1B/CASP3/MAPK1/RIPK2/MAPK3/MALT1/TGFBR2/IL1A/BAX	16	-1
BP	GO:0009266	response to temperature stimulus	12/198	180/18800	4.73025e-07	6.09917e-06	3.47841e-06	CASP8/HSP90AA1/VCP/STUB1/HTRA2/SUMO1/HSPB1/AKT1/ATXN3/MAP2K7/FOXO1/IL1A	12	-0.57735
BP	GO:0030278	regulation of ossification	10/198	118/18800	4.86133e-07	6.22238e-06	3.54867e-06	COMP/BCL2/ESRRA/BMP2/BMPR2/SMAD7/MAPK1/TGFB1/BMPR1A/MAPK3	10	-1.26491
BP	GO:1904707	positive regulation of vascular associated smooth muscle cell proliferation	7/198	46/18800	4.88656e-07	6.22238e-06	3.54867e-06	MAP3K5/TNF/MFN2/ADAMTS1/BMPR1A/MMP9/MMP2	7	0.377964
BP	GO:0045838	positive regulation of membrane potential	5/198	16/18800	4.89704e-07	6.22238e-06	3.54867e-06	BID/VCP/BAD/AKT1/MFN1	5	-0.447214
BP	GO:0032386	regulation of intracellular transport	16/198	332/18800	4.90415e-07	6.22238e-06	3.54867e-06	UBE2D3/PRKCD/HTRA2/UBE2G2/SUMO1/PARK7/UBE2L3/MAPK1/PINK1/TARDBP/TGFB1/MAPK3/HAX1/FIS1/TOMM7/PARL	16	-0.5
BP	GO:0051654	establishment of mitochondrion localization	6/198	29/18800	4.91106e-07	6.22238e-06	3.54867e-06	UBB/RHOT2/HDAC6/LRPPRC/RHOT1/OPA1	6	0
BP	GO:1901224	positive regulation of NIK/NF-kappaB signaling	8/198	67/18800	5.03553e-07	6.35802e-06	3.62603e-06	DDX3X/TNF/TLR3/TRAF6/RELA/TRADD/NOD2/NOD1	8	-2.12132
BP	GO:0002696	positive regulation of leukocyte activation	18/198	421/18800	5.37246e-07	6.76003e-06	3.8553e-06	BCL2/FADD/BCL10/TICAM1/TNF/CD40/TRAF6/AMBRA1/BAD/NOD2/AKT1/TGFB1/RIPK2/CAV1/FOXO3/MALT1/TGFBR2/IL1A	18	-0.471405
BP	GO:0044843	cell cycle G1/S phase transition	14/198	255/18800	5.55332e-07	6.9636e-06	3.97139e-06	BCL2/DDX3X/BID/FBXO7/AMBRA1/PTEN/AKT1/ADAMTS1/PIDD1/CRADD/UBE2E2/PPP2CA/PKD2/CASP2	14	0.534522
BP	GO:0007159	leukocyte cell-cell adhesion	17/198	381/18800	6.25292e-07	7.81401e-06	4.45639e-06	FADD/BCL10/TNF/TRAF6/AMBRA1/RELA/BAD/SMAD7/CASP3/NOD2/AKT1/RIPK2/CAV1/FOXO3/MALT1/TGFBR2/IL1A	17	-0.727607
BP	GO:0042326	negative regulation of phosphorylation	17/198	382/18800	6.48425e-07	8.07544e-06	4.60549e-06	BAK1/BMP2/FBXO7/PRKCD/PARK7/PPP1R15B/HSPB1/SMAD7/PTEN/CASP3/AKT1/TARDBP/TGFB1/CAV1/PPP2CA/COX11/BAX	17	-0.727607
BP	GO:1902916	positive regulation of protein polyubiquitination	5/198	17/18800	6.87825e-07	8.53698e-06	4.86871e-06	DDX3X/UBE2D1/XIAP/UBE2N/NOD2	5	-2.23607
BP	GO:0001933	negative regulation of protein phosphorylation	16/198	341/18800	6.99446e-07	8.65179e-06	4.93418e-06	BAK1/BMP2/FBXO7/PRKCD/PARK7/PPP1R15B/HSPB1/SMAD7/PTEN/CASP3/AKT1/TARDBP/TGFB1/CAV1/PPP2CA/BAX	16	-1
BP	GO:0042060	wound healing	18/198	429/18800	7.05368e-07	8.69557e-06	4.95915e-06	COMP/MAP3K5/TNF/TGFBR1/CD40/PRKCD/CFLAR/HSPB1/PTEN/CASP3/RAF1/TGFB1/CAV1/SYT11/TGFBR2/IL1A/FN1/MMP12	18	-0.471405
BP	GO:0050870	positive regulation of T cell activation	13/198	223/18800	7.25879e-07	8.91829e-06	5.08617e-06	FADD/BCL10/TRAF6/AMBRA1/BAD/NOD2/AKT1/RIPK2/CAV1/FOXO3/MALT1/TGFBR2/IL1A	13	0.27735
BP	GO:0035094	response to nicotine	7/198	49/18800	7.63578e-07	9.31872e-06	5.31454e-06	BCL2/TNF/RELA/BAD/CASP3/MAPK1/MMP2	7	-1.88982
BP	GO:0043330	response to exogenous dsRNA	7/198	49/18800	7.63578e-07	9.31872e-06	5.31454e-06	TICAM1/TLR3/NOD2/MAPK1/RIPK2/MAPK3/CAV1	7	-0.377964
BP	GO:0046660	female sex differentiation	10/198	124/18800	7.70713e-07	9.37444e-06	5.34631e-06	BAK1/BCL2/BCL2L1/UBB/CASP3/ADAMTS1/FOXO3/CASP2/BAX/MMP2	10	0
BP	GO:2000379	positive regulation of reactive oxygen species metabolic process	8/198	71/18800	7.92377e-07	9.60592e-06	5.47833e-06	RIPK3/PRKCD/PARK7/RNF41/RIPK1/TGFB1/FOXO3/TGFBR2	8	0
BP	GO:0032755	positive regulation of interleukin-6 production	9/198	97/18800	8.54196e-07	1.03211e-05	5.88618e-06	BCL10/TICAM1/TNF/TLR3/TRAF6/NOD2/RIPK2/NOD1/IL1A	9	-1
BP	GO:1903747	regulation of establishment of protein localization to mitochondrion	7/198	50/18800	8.80019e-07	1.0598e-05	6.04411e-06	UBE2D3/HTRA2/UBE2L3/PINK1/HAX1/TOMM7/PARL	7	-0.377964
BP	GO:0050867	positive regulation of cell activation	18/198	436/18800	8.90327e-07	1.06869e-05	6.09479e-06	BCL2/FADD/BCL10/TICAM1/TNF/CD40/TRAF6/AMBRA1/BAD/NOD2/AKT1/TGFB1/RIPK2/CAV1/FOXO3/MALT1/TGFBR2/IL1A	18	-0.471405
BP	GO:0030099	myeloid cell differentiation	17/198	391/18800	8.94349e-07	1.06999e-05	6.10226e-06	CASP9/FADD/CASP8/ESRRA/TNF/TLR3/TRAF6/RNF41/CASP3/SLC25A5/RIPK1/TGFB1/FOXO3/MMP9/HAX1/TGFBR2/PPARGC1B	17	-0.242536
BP	GO:0007250	activation of NF-kappaB-inducing kinase activity	5/198	18/18800	9.44243e-07	1.11868e-05	6.37993e-06	TLR3/TRAF6/MAP3K7/TRAF2/MALT1	5	0.447214
BP	GO:0060391	positive regulation of SMAD protein signal transduction	5/198	18/18800	9.44243e-07	1.11868e-05	6.37993e-06	TGFBR1/BMP2/BMPR2/TGFB1/BMPR1A	5	-0.447214
BP	GO:0097284	hepatocyte apoptotic process	5/198	18/18800	9.44243e-07	1.11868e-05	6.37993e-06	BID/BCL2L1/CFLAR/CASP6/GSN	5	-0.447214
BP	GO:0050852	T cell receptor signaling pathway	10/198	127/18800	9.61121e-07	1.13316e-05	6.46252e-06	BCL10/IKBKB/TRAF6/RELA/IKBKG/UBE2N/MAPK1/MAP3K7/RIPK2/MALT1	10	-1.26491
BP	GO:0090092	regulation of transmembrane receptor protein serine/threonine kinase signaling pathway	14/198	267/18800	9.62676e-07	1.13316e-05	6.46252e-06	TGFBR1/UBE2D1/BMP2/UBE2D3/STUB1/XIAP/BMPR2/SMAD7/TGFB1/BMPR1A/CAV1/HTRA1/TGFBR2/HTRA3	14	-0.534522
BP	GO:0032732	positive regulation of interleukin-1 production	8/198	73/18800	9.83304e-07	1.15372e-05	6.57977e-06	CASP8/TNF/HSPB1/NOD2/RIPK2/CARD8/NOD1/MALT1	8	0
BP	GO:0045639	positive regulation of myeloid cell differentiation	9/198	99/18800	1.01607e-06	1.18835e-05	6.77722e-06	FADD/CASP8/TNF/TRAF6/RIPK1/TGFB1/FOXO3/HAX1/PPARGC1B	9	0.333333
BP	GO:1901099	negative regulation of signal transduction in absence of ligand	6/198	33/18800	1.10563e-06	1.28077e-05	7.30434e-06	BCL2/TNF/BCL2L1/AKT1/RIPK1/IL1A	6	0
BP	GO:1903715	regulation of aerobic respiration	6/198	33/18800	1.10563e-06	1.28077e-05	7.30434e-06	TNF/VCP/PARK7/PINK1/PPIF/COX7A2L	6	-0.816497
BP	GO:2001240	negative regulation of extrinsic apoptotic signaling pathway in absence of ligand	6/198	33/18800	1.10563e-06	1.28077e-05	7.30434e-06	BCL2/TNF/BCL2L1/AKT1/RIPK1/IL1A	6	0
BP	GO:0043525	positive regulation of neuron apoptotic process	7/198	52/18800	1.15791e-06	1.3371e-05	7.62556e-06	CASP9/TNF/CASP3/FOXO3/MAP2K7/CASP2/BAX	7	0.377964
BP	GO:0045732	positive regulation of protein catabolic process	13/198	233/18800	1.18972e-06	1.3671e-05	7.7967e-06	TNF/HSP90AA1/VCP/STUB1/SUMO1/RNF41/SMAD7/PTEN/TNFRSF1B/AKT1/CAV1/ATXN3/FOXO1	13	-1.38675
BP	GO:0035303	regulation of dephosphorylation	10/198	130/18800	1.19139e-06	1.3671e-05	7.7967e-06	RIPK3/TNF/BMP2/IKBKB/AMBRA1/PRKCD/PPP1R15B/PINK1/TGFB1/PPARGC1B	10	-1.89737
BP	GO:0031667	response to nutrient levels	18/198	446/18800	1.23141e-06	1.40859e-05	8.03329e-06	BCL2/MAP3K5/BCL10/TNF/CAT/FAS/BMPR2/SIRT5/NOD2/MAPK1/AKT1/BECN1/APAF1/MAPK3/FOXO3/TGFBR2/FOXO1/IL1A	18	-0.471405
BP	GO:0044089	positive regulation of cellular component biogenesis	19/198	494/18800	1.26083e-06	1.43774e-05	8.19954e-06	MMP1/BAK1/DDX3X/MMP3/TNF/BID/TGFBR1/HSP90AA1/VCP/STUB1/AMBRA1/SUMO1/PARK7/PINK1/BECN1/TGFB1/CAV1/CTTN/BAX	19	-2.06474
BP	GO:0055093	response to hyperoxia	5/198	19/18800	1.27054e-06	1.43981e-05	8.21134e-06	CAT/FAS/CAV1/FOXO1/MMP2	5	0.447214
BP	GO:1902170	cellular response to reactive nitrogen species	5/198	19/18800	1.27054e-06	1.43981e-05	8.21134e-06	MAP3K5/MMP3/CFLAR/TRAF2/FOXO1	5	-0.447214
BP	GO:0032743	positive regulation of interleukin-2 production	6/198	34/18800	1.33084e-06	1.50347e-05	8.57442e-06	TRAF6/MAP3K7/TRAF2/RIPK2/MALT1/IL1A	6	1.63299
BP	GO:0032760	positive regulation of tumor necrosis factor production	9/198	103/18800	1.42075e-06	1.6001e-05	9.12551e-06	FADD/TICAM1/TLR3/HSPB1/NOD2/RIPK1/RIPK2/NOD1/IL1A	9	-0.333333
BP	GO:1903202	negative regulation of oxidative stress-induced cell death	7/198	54/18800	1.5058e-06	1.69066e-05	9.64198e-06	GFER/FBXO7/HTRA2/PARK7/HSPB1/PINK1/AKT1	7	-1.88982
BP	GO:0071453	cellular response to oxygen levels	11/198	166/18800	1.52419e-06	1.70606e-05	9.7298e-06	BCL2/FAS/STUB1/BAD/CFLAR/PTEN/PINK1/AKT1/CAV1/FOXO3/FOXO1	11	-0.904534
BP	GO:1903533	regulation of protein targeting	8/198	78/18800	1.63982e-06	1.82988e-05	1.04359e-05	UBE2D3/HTRA2/UBE2L3/PINK1/HAX1/FIS1/TOMM7/PARL	8	0
BP	GO:0008585	female gonad development	9/198	105/18800	1.67065e-06	1.85722e-05	1.05919e-05	BCL2/BCL2L1/UBB/CASP3/ADAMTS1/FOXO3/CASP2/BAX/MMP2	9	0.333333
BP	GO:0090201	negative regulation of release of cytochrome c from mitochondria	5/198	20/18800	1.67959e-06	1.85722e-05	1.05919e-05	BCL2L1/AKT1/PPIF/OPA1/PARL	5	1.34164
BP	GO:1902176	negative regulation of oxidative stress-induced intrinsic apoptotic signaling pathway	5/198	20/18800	1.67959e-06	1.85722e-05	1.05919e-05	HTRA2/PARK7/HSPB1/PINK1/AKT1	5	-1.34164
BP	GO:1904645	response to amyloid-beta	7/198	55/18800	1.71012e-06	1.88527e-05	1.07518e-05	MMP3/TNF/FOXO3/MMP9/MMP13/MMP2/MMP12	7	1.13389
BP	GO:0007548	sex differentiation	14/198	281/18800	1.76189e-06	1.93648e-05	1.10439e-05	BAK1/BCL2/TGFBR1/BCL2L1/UBB/TLR3/CASP3/ADAMTS1/BMPR1A/FOXO3/CASP2/IL1A/BAX/MMP2	14	0
BP	GO:0006970	response to osmotic stress	8/198	79/18800	1.80827e-06	1.9815e-05	1.13006e-05	DDX3X/TNF/TLR3/BAD/CASP3/PKD2/MAP2K7/BAX	8	-0.707107
BP	GO:0017004	cytochrome complex assembly	6/198	36/18800	1.89395e-06	2.06916e-05	1.18006e-05	HCCS/SURF1/COX18/SCO1/COX19/UQCRFS1	6	1.63299
BP	GO:0043331	response to dsRNA	7/198	56/18800	1.93713e-06	2.11002e-05	1.20336e-05	TICAM1/TLR3/NOD2/MAPK1/RIPK2/MAPK3/CAV1	7	-0.377964
BP	GO:0002705	positive regulation of leukocyte mediated immunity	10/198	138/18800	2.05568e-06	2.23249e-05	1.27321e-05	FADD/TICAM1/TNF/CD40/TRAF6/NOD2/MAP3K7/TGFB1/TRAF2/MALT1	10	-0.632456
BP	GO:0043523	regulation of neuron apoptotic process	12/198	207/18800	2.07728e-06	2.24925e-05	1.28277e-05	BCL2/CASP9/TNF/BCL2L1/PARK7/CASP3/PINK1/NGF/FOXO3/MAP2K7/CASP2/BAX	12	-0.57735
BP	GO:0002768	immune response-regulating cell surface receptor signaling pathway	15/198	328/18800	2.16466e-06	2.33693e-05	1.33277e-05	BCL2/BCL10/CD40/IKBKB/TRAF6/RELA/IKBKG/PRKCD/UBE2N/MAPK1/MAP3K7/RIPK2/MAP2K7/MALT1/BAX	15	-1.29099
BP	GO:0045637	regulation of myeloid cell differentiation	12/198	208/18800	2.18436e-06	2.34573e-05	1.33779e-05	FADD/CASP8/ESRRA/TNF/TLR3/TRAF6/RNF41/RIPK1/TGFB1/FOXO3/HAX1/PPARGC1B	12	-0.57735
BP	GO:0032727	positive regulation of interferon-alpha production	5/198	21/18800	2.18566e-06	2.34573e-05	1.33779e-05	DDX3X/CHUK/TLR3/RIPK2/MMP12	5	-0.447214
BP	GO:0071276	cellular response to cadmium ion	6/198	37/18800	2.24081e-06	2.39786e-05	1.36752e-05	CHUK/SUMO1/MAPK1/AKT1/MAPK3/MMP9	6	0
BP	GO:0046545	development of primary female sexual characteristics	9/198	109/18800	2.286e-06	2.43907e-05	1.39102e-05	BCL2/BCL2L1/UBB/CASP3/ADAMTS1/FOXO3/CASP2/BAX/MMP2	9	0.333333
BP	GO:0048545	response to steroid hormone	15/198	330/18800	2.33278e-06	2.48172e-05	1.41534e-05	BCL2/CASP9/ESRRA/TNF/BAD/PARK7/HDAC6/CFLAR/CASP3/UBE2L3/TGFB1/CAV1/FOXO3/TGFBR2/PPARGC1B	15	-1.29099
BP	GO:2001269	positive regulation of cysteine-type endopeptidase activity involved in apoptotic signaling pathway	4/198	10/18800	2.38539e-06	2.53032e-05	1.44306e-05	FAS/HTRA2/GSN/BAX	4	0
BP	GO:1905897	regulation of response to endoplasmic reticulum stress	8/198	82/18800	2.40472e-06	2.54343e-05	1.45054e-05	BAK1/BCL2L1/PARK7/PPP1R15B/CAV1/ATXN3/OPA1/BAX	8	0
BP	GO:0002573	myeloid leukocyte differentiation	12/198	210/18800	2.41327e-06	2.5451e-05	1.45149e-05	FADD/CASP8/ESRRA/TNF/TLR3/TRAF6/RIPK1/TGFB1/MMP9/HAX1/TGFBR2/PPARGC1B	12	0
BP	GO:0032481	positive regulation of type I interferon production	7/198	58/18800	2.46718e-06	2.59445e-05	1.47964e-05	TICAM1/DDX3X/HSP90AA1/CHUK/TLR3/RIPK2/MMP12	7	-1.13389
BP	GO:0002369	T cell cytokine production	6/198	38/18800	2.63776e-06	2.75793e-05	1.57287e-05	TRAF6/SMAD7/TNFRSF1B/MAP3K7/TRAF2/MALT1	6	0
BP	GO:0002724	regulation of T cell cytokine production	6/198	38/18800	2.63776e-06	2.75793e-05	1.57287e-05	TRAF6/SMAD7/TNFRSF1B/MAP3K7/TRAF2/MALT1	6	0
BP	GO:0032147	activation of protein kinase activity	10/198	142/18800	2.66334e-06	2.77673e-05	1.58359e-05	RIPK3/TLR3/TRAF6/PRKCD/PARK7/PINK1/MAP3K7/TRAF2/MALT1/TGFBR2	10	-0.632456
BP	GO:0046686	response to cadmium ion	7/198	59/18800	2.77454e-06	2.87976e-05	1.64235e-05	CAT/CHUK/SUMO1/MAPK1/AKT1/MAPK3/MMP9	7	-0.377964
BP	GO:0042391	regulation of membrane potential	17/198	425/18800	2.77795e-06	2.87976e-05	1.64235e-05	BAK1/BCL2/TNF/BID/BCL2L1/VCP/UBB/BAD/SUMO1/PARK7/SMAD7/PTEN/PINK1/AKT1/CAV1/MFN1/BAX	17	-2.18282
BP	GO:0002456	T cell mediated immunity	9/198	112/18800	2.86725e-06	2.96391e-05	1.69034e-05	FADD/RIPK3/TRAF6/SMAD7/TNFRSF1B/NOD2/MAP3K7/TRAF2/MALT1	9	-1
BP	GO:0030098	lymphocyte differentiation	16/198	382/18800	3.06776e-06	3.15331e-05	1.79836e-05	BAK1/BCL2/FADD/RIPK3/FBXO7/AMBRA1/BAD/RNF41/SMAD7/SLC25A5/RIPK2/FOXO3/MALT1/TGFBR2/IL1A/BAX	16	-0.5
BP	GO:0050678	regulation of epithelial cell proliferation	16/198	382/18800	3.06776e-06	3.15331e-05	1.79836e-05	TNF/TGFBR1/BMP2/BAD/CFLAR/BMPR2/PTEN/NOD2/AKT1/TGFB1/BMPR1A/MAGED1/CAV1/HTRA1/BAX/MMP12	16	0
BP	GO:0070663	regulation of leukocyte proliferation	13/198	254/18800	3.10048e-06	3.178e-05	1.81244e-05	BCL2/FADD/RIPK3/TICAM1/CD40/TRAF6/TNFRSF1B/CASP3/MAPK1/RIPK2/MAPK3/TGFBR2/IL1A	13	-1.38675
BP	GO:0002753	cytoplasmic pattern recognition receptor signaling pathway	7/198	60/18800	3.1132e-06	3.18209e-05	1.81477e-05	TRAF6/XIAP/RELA/NOD2/MAP3K7/RIPK2/BIRC3	7	-0.377964
BP	GO:0043491	protein kinase B signaling	12/198	216/18800	3.23219e-06	3.28676e-05	1.87447e-05	TNF/TGFBR1/HSP90AA1/CD40/PARK7/RNF41/PTEN/PINK1/AKT1/TGFB1/PPP2CA/HAX1	12	-1.1547
BP	GO:0046651	lymphocyte proliferation	14/198	296/18800	3.23362e-06	3.28676e-05	1.87447e-05	BCL2/FADD/RIPK3/TICAM1/CD40/TRAF6/PRKCD/TNFRSF1B/CASP3/RIPK2/MALT1/TGFBR2/IL1A/BAX	14	-1.06904
BP	GO:0009991	response to extracellular stimulus	18/198	479/18800	3.36626e-06	3.41208e-05	1.94593e-05	BCL2/MAP3K5/BCL10/TNF/CAT/FAS/BMPR2/SIRT5/NOD2/MAPK1/AKT1/BECN1/APAF1/MAPK3/FOXO3/TGFBR2/FOXO1/IL1A	18	-0.471405
BP	GO:1904705	regulation of vascular associated smooth muscle cell proliferation	8/198	86/18800	3.45369e-06	3.491e-05	1.99095e-05	MAP3K5/TNF/MFN2/PTEN/ADAMTS1/BMPR1A/MMP9/MMP2	8	0
BP	GO:0002253	activation of immune response	16/198	386/18800	3.50493e-06	3.53301e-05	2.0149e-05	BCL2/BCL10/HSP90AA1/IKBKB/TRAF6/RELA/IKBKG/PRKCD/UBE2N/NOD2/MAPK1/MAP3K7/RIPK2/CASP6/MALT1/BAX	16	-1.5
BP	GO:1903131	mononuclear cell differentiation	17/198	433/18800	3.56519e-06	3.5802e-05	2.04181e-05	BAK1/BCL2/FADD/RIPK3/FBXO7/TRAF6/AMBRA1/BAD/RNF41/SMAD7/SLC25A5/RIPK2/FOXO3/MALT1/TGFBR2/IL1A/BAX	17	-0.727607
BP	GO:0018107	peptidyl-threonine phosphorylation	9/198	115/18800	3.57137e-06	3.5802e-05	2.04181e-05	BCL2/TGFBR1/PRKCD/SMAD7/MAPK1/AKT1/TGFB1/RIPK2/TGFBR2	9	-0.333333
BP	GO:1903362	regulation of cellular protein catabolic process	13/198	258/18800	3.68002e-06	3.67901e-05	2.09817e-05	HSP90AA1/VCP/UBB/STUB1/SUMO1/PARK7/SMAD7/PTEN/PINK1/AKT1/CAV1/COMMD1/ATXN3	13	-1.38675
BP	GO:0071492	cellular response to UV-A	4/198	11/18800	3.71758e-06	3.70641e-05	2.11379e-05	MMP1/MMP3/MMP9/MMP2	4	0
BP	GO:1990874	vascular associated smooth muscle cell proliferation	8/198	87/18800	3.76944e-06	3.74548e-05	2.13608e-05	MAP3K5/TNF/MFN2/PTEN/ADAMTS1/BMPR1A/MMP9/MMP2	8	0
BP	GO:0032943	mononuclear cell proliferation	14/198	300/18800	3.7773e-06	3.74548e-05	2.13608e-05	BCL2/FADD/RIPK3/TICAM1/CD40/TRAF6/PRKCD/TNFRSF1B/CASP3/RIPK2/MALT1/TGFBR2/IL1A/BAX	14	-1.06904
BP	GO:0060393	regulation of pathway-restricted SMAD protein phosphorylation	7/198	62/18800	3.89454e-06	3.85127e-05	2.19641e-05	TGFBR1/BMP2/BMPR2/SMAD7/TGFB1/BMPR1A/TGFBR2	7	-0.377964
BP	GO:0060485	mesenchyme development	14/198	301/18800	3.92534e-06	3.87123e-05	2.20779e-05	BCL2/TGFBR1/BMP2/BMPR2/SMAD7/PTEN/MAPK1/TGFB1/BMPR1A/MAPK3/PPP2CA/PKD2/TGFBR2/FN1	14	0
BP	GO:0061448	connective tissue development	13/198	260/18800	4.00427e-06	3.93844e-05	2.24612e-05	COMP/ESRRA/TGFBR1/BMP2/UBB/CFLAR/BMPR2/SMAD7/TGFB1/BMPR1A/MAPK3/TGFBR2/MMP13	13	-0.83205
BP	GO:0034644	cellular response to UV	8/198	88/18800	4.10934e-06	4.02978e-05	2.29822e-05	MMP1/BAK1/CASP9/MMP3/PRKCD/MMP9/BAX/MMP2	8	-0.707107
BP	GO:0002708	positive regulation of lymphocyte mediated immunity	9/198	117/18800	4.11923e-06	4.02978e-05	2.29822e-05	FADD/TNF/CD40/TRAF6/NOD2/MAP3K7/TGFB1/TRAF2/MALT1	9	-0.333333
BP	GO:0001822	kidney development	14/198	303/18800	4.237e-06	4.13391e-05	2.3576e-05	BCL2/CASP9/FADD/TGFBR1/CAT/BMP2/CFLAR/SMAD7/ADAMTS1/APAF1/MAGED1/PKD2/MMP9/BAX	14	-0.534522
BP	GO:0032623	interleukin-2 production	7/198	63/18800	4.34261e-06	4.21441e-05	2.40351e-05	TRAF6/NOD2/MAP3K7/TRAF2/RIPK2/MALT1/IL1A	7	1.13389
BP	GO:0032663	regulation of interleukin-2 production	7/198	63/18800	4.34261e-06	4.21441e-05	2.40351e-05	TRAF6/NOD2/MAP3K7/TRAF2/RIPK2/MALT1/IL1A	7	1.13389
BP	GO:0002082	regulation of oxidative phosphorylation	5/198	24/18800	4.4495e-06	4.30669e-05	2.45614e-05	TNF/VCP/PINK1/PPIF/COX7A2L	5	-0.447214
BP	GO:1903050	regulation of proteolysis involved in cellular protein catabolic process	12/198	223/18800	4.48951e-06	4.33392e-05	2.47167e-05	VCP/UBB/STUB1/SUMO1/PARK7/SMAD7/PTEN/PINK1/AKT1/CAV1/COMMD1/ATXN3	12	-1.1547
BP	GO:0050727	regulation of inflammatory response	16/198	394/18800	4.55074e-06	4.38144e-05	2.49877e-05	MMP3/TNF/TNFRSF1A/TLR3/XIAP/RELA/PRKCD/PARK7/TRADD/TNFRSF1B/NOD2/RIPK1/SYT11/MMP9/SHARPIN/BIRC3	16	-1.5
BP	GO:0050673	epithelial cell proliferation	17/198	443/18800	4.82901e-06	4.60807e-05	2.62802e-05	TNF/TGFBR1/BMP2/BAD/CFLAR/BMPR2/PTEN/NOD2/MAPK1/AKT1/TGFB1/BMPR1A/MAGED1/CAV1/HTRA1/BAX/MMP12	17	-0.242536
BP	GO:0030574	collagen catabolic process	6/198	42/18800	4.83977e-06	4.60807e-05	2.62802e-05	MMP1/MMP3/MMP9/MMP13/MMP2/MMP12	6	0.816497
BP	GO:0032735	positive regulation of interleukin-12 production	6/198	42/18800	4.83977e-06	4.60807e-05	2.62802e-05	CD40/TLR3/TRAF6/RELA/NOD2/RIPK2	6	-1.63299
BP	GO:0071706	tumor necrosis factor superfamily cytokine production	11/198	187/18800	4.84927e-06	4.60807e-05	2.62802e-05	FADD/BCL10/TICAM1/TLR3/HSPB1/NOD2/RIPK1/RIPK2/NOD1/SYT11/IL1A	11	-0.301511
BP	GO:1903555	regulation of tumor necrosis factor superfamily cytokine production	11/198	187/18800	4.84927e-06	4.60807e-05	2.62802e-05	FADD/BCL10/TICAM1/TLR3/HSPB1/NOD2/RIPK1/RIPK2/NOD1/SYT11/IL1A	11	-0.301511
BP	GO:0002702	positive regulation of production of molecular mediator of immune response	9/198	120/18800	5.0758e-06	4.81081e-05	2.74364e-05	BCL10/TICAM1/CD40/TRAF6/NOD2/MAP3K7/TGFB1/TRAF2/MALT1	9	-0.333333
BP	GO:0008406	gonad development	12/198	226/18800	5.14854e-06	4.8671e-05	2.77574e-05	BCL2/TGFBR1/BCL2L1/UBB/TLR3/CASP3/ADAMTS1/FOXO3/CASP2/IL1A/BAX/MMP2	12	0
BP	GO:0045785	positive regulation of cell adhesion	17/198	446/18800	5.27984e-06	4.9655e-05	2.83186e-05	FADD/BCL10/TNF/TRAF6/AMBRA1/RELA/BAD/SMAD7/NOD2/AKT1/RIPK2/CAV1/FOXO3/MALT1/TGFBR2/IL1A/FN1	17	-0.242536
BP	GO:1903829	positive regulation of protein localization	17/198	446/18800	5.27984e-06	4.9655e-05	2.83186e-05	SQSTM1/TNF/UBE2D3/PRKCD/HTRA2/BAD/PARK7/UBE2L3/PINK1/AKT1/TARDBP/TGFB1/SYT11/FIS1/DNM1L/IL1A/TOMM7	17	-0.242536
BP	GO:0051223	regulation of protein transport	18/198	495/18800	5.30493e-06	4.97627e-05	2.838e-05	TNF/UBE2D3/PRKCD/HTRA2/BAD/UBE2G2/SUMO1/PARK7/UBE2L3/PINK1/TARDBP/TGFB1/HAX1/FIS1/DNM1L/IL1A/TOMM7/PARL	18	-0.471405
BP	GO:0003170	heart valve development	7/198	65/18800	5.36819e-06	5.0227e-05	2.86448e-05	TNFRSF1A/BMP2/BMPR2/TNFRSF1B/TGFB1/BMPR1A/TGFBR2	7	-0.377964
BP	GO:0043507	positive regulation of JUN kinase activity	6/198	43/18800	5.57559e-06	5.20341e-05	2.96755e-05	MAP3K5/TNF/TRAF6/MAP3K7/TRAF2/MAP2K7	6	0
BP	GO:0061136	regulation of proteasomal protein catabolic process	11/198	190/18800	5.64825e-06	5.25777e-05	2.99855e-05	VCP/UBB/STUB1/SUMO1/PARK7/SMAD7/PINK1/AKT1/CAV1/COMMD1/ATXN3	11	-0.904534
BP	GO:0043271	negative regulation of ion transport	10/198	155/18800	5.84242e-06	5.42468e-05	3.09374e-05	BCL2/TNF/SUMO1/PPIF/CAV1/PKD2/COMMD1/SYT11/MMP9/VDAC1	10	1.26491
BP	GO:0072001	renal system development	14/198	312/18800	5.92929e-06	5.48457e-05	3.12789e-05	BCL2/CASP9/FADD/TGFBR1/CAT/BMP2/CFLAR/SMAD7/ADAMTS1/APAF1/MAGED1/PKD2/MMP9/BAX	14	-0.534522
BP	GO:0034605	cellular response to heat	7/198	66/18800	5.95201e-06	5.48457e-05	3.12789e-05	HSP90AA1/VCP/STUB1/HTRA2/SUMO1/ATXN3/IL1A	7	-1.13389
BP	GO:0060389	pathway-restricted SMAD protein phosphorylation	7/198	66/18800	5.95201e-06	5.48457e-05	3.12789e-05	TGFBR1/BMP2/BMPR2/SMAD7/TGFB1/BMPR1A/TGFBR2	7	-0.377964
BP	GO:0022612	gland morphogenesis	9/198	123/18800	6.21693e-06	5.69989e-05	3.25069e-05	BCL2/TNF/CFLAR/TGFB1/CAV1/TGFBR2/BAX/MMP2/TNC	9	1
BP	GO:0032355	response to estradiol	9/198	123/18800	6.21693e-06	5.69989e-05	3.25069e-05	CASP9/CASP8/ESRRA/CAT/BAD/CFLAR/CASP3/TGFB1/MMP2	9	-1.66667
BP	GO:0045088	regulation of innate immune response	12/198	231/18800	6.43716e-06	5.8723e-05	3.34902e-05	FADD/CASP8/GFER/HSP90AA1/IKBKB/TRAF6/XIAP/NOD2/MAP3K7/CASP6/BIRC3/MMP12	12	-1.1547
BP	GO:0045137	development of primary sexual characteristics	12/198	231/18800	6.43716e-06	5.8723e-05	3.34902e-05	BCL2/TGFBR1/BCL2L1/UBB/TLR3/CASP3/ADAMTS1/FOXO3/CASP2/IL1A/BAX/MMP2	12	0
BP	GO:0018210	peptidyl-threonine modification	9/198	124/18800	6.64316e-06	6.04511e-05	3.44757e-05	BCL2/TGFBR1/PRKCD/SMAD7/MAPK1/AKT1/TGFB1/RIPK2/TGFBR2	9	-0.333333
BP	GO:0036296	response to increased oxygen levels	5/198	26/18800	6.76925e-06	6.12928e-05	3.49558e-05	CAT/FAS/CAV1/FOXO1/MMP2	5	0.447214
BP	GO:0051204	protein insertion into mitochondrial membrane	5/198	26/18800	6.76925e-06	6.12928e-05	3.49558e-05	HSP90AA1/TOMM22/COX18/HSPA4/BAX	5	0.447214
BP	GO:0070665	positive regulation of leukocyte proliferation	10/198	158/18800	6.9263e-06	6.25596e-05	3.56782e-05	BCL2/FADD/TICAM1/CD40/TRAF6/MAPK1/RIPK2/MAPK3/TGFBR2/IL1A	10	-0.632456
BP	GO:0051216	cartilage development	11/198	195/18800	7.23663e-06	6.52012e-05	3.71847e-05	COMP/ESRRA/TGFBR1/BMP2/BMPR2/SMAD7/TGFB1/BMPR1A/MAPK3/TGFBR2/MMP13	11	-0.301511
BP	GO:0002443	leukocyte mediated immunity	17/198	457/18800	7.27479e-06	6.52581e-05	3.72172e-05	FADD/RIPK3/BCL10/TICAM1/GFER/TNF/CD40/TLR3/TRAF6/PRKCD/SMAD7/TNFRSF1B/NOD2/MAP3K7/TGFB1/TRAF2/MALT1	17	-2.18282
BP	GO:0002720	positive regulation of cytokine production involved in immune response	7/198	68/18800	7.27872e-06	6.52581e-05	3.72172e-05	BCL10/TICAM1/TRAF6/NOD2/MAP3K7/TRAF2/MALT1	7	-0.377964
BP	GO:1902895	positive regulation of miRNA transcription	6/198	45/18800	7.31999e-06	6.54672e-05	3.73365e-05	TNF/BMP2/RELA/TGFB1/BMPR1A/FOXO3	6	0
BP	GO:0097305	response to alcohol	12/198	235/18800	7.66394e-06	6.83759e-05	3.89953e-05	BAK1/CASP8/TNF/TGFBR1/BCL2L1/CAT/FDX1/BAD/AKT1/TGFB1/FOXO3/TGFBR2	12	-1.1547
BP	GO:0002449	lymphocyte mediated immunity	15/198	365/18800	7.91496e-06	6.99988e-05	3.99209e-05	FADD/RIPK3/BCL10/GFER/TNF/CD40/TRAF6/PRKCD/SMAD7/TNFRSF1B/NOD2/MAP3K7/TGFB1/TRAF2/MALT1	15	-1.80739
BP	GO:0010623	programmed cell death involved in cell development	4/198	13/18800	7.92259e-06	6.99988e-05	3.99209e-05	BCL2/CASP2/IL1A/BAX	4	1
BP	GO:0036462	TRAIL-activated apoptotic signaling pathway	4/198	13/18800	7.92259e-06	6.99988e-05	3.99209e-05	FADD/CASP8/PARK7/PTEN	4	-2
BP	GO:1901298	regulation of hydrogen peroxide-mediated programmed cell death	4/198	13/18800	7.92259e-06	6.99988e-05	3.99209e-05	PARK7/HDAC6/PINK1/FOXO3	4	-1
BP	GO:1901990	regulation of mitotic cell cycle phase transition	14/198	321/18800	8.19725e-06	7.22506e-05	4.12051e-05	BCL2/DDX3X/BID/FBXO7/AMBRA1/PTEN/AKT1/ADAMTS1/PIDD1/CRADD/UBE2E2/PPP2CA/PKD2/CASP2	14	0.534522
BP	GO:0032607	interferon-alpha production	5/198	27/18800	8.23694e-06	7.22514e-05	4.12055e-05	DDX3X/CHUK/TLR3/RIPK2/MMP12	5	-0.447214
BP	GO:0032647	regulation of interferon-alpha production	5/198	27/18800	8.23694e-06	7.22514e-05	4.12055e-05	DDX3X/CHUK/TLR3/RIPK2/MMP12	5	-0.447214
BP	GO:0051051	negative regulation of transport	17/198	464/18800	8.87318e-06	7.76456e-05	4.42819e-05	BCL2/TNF/TNFRSF1A/UBE2G2/SUMO1/PARK7/PTEN/TNFRSF1B/AKT1/PPIF/CAV1/PKD2/COMMD1/SYT11/MMP9/FIS1/VDAC1	17	0.242536
BP	GO:0032479	regulation of type I interferon production	8/198	98/18800	9.19744e-06	8.0099e-05	4.5681e-05	TICAM1/DDX3X/HSP90AA1/CHUK/TLR3/RIPK2/TRAF3/MMP12	8	-0.707107
BP	GO:0032606	type I interferon production	8/198	98/18800	9.19744e-06	8.0099e-05	4.5681e-05	TICAM1/DDX3X/HSP90AA1/CHUK/TLR3/RIPK2/TRAF3/MMP12	8	-0.707107
BP	GO:0002460	adaptive immune response based on somatic recombination of immune receptors built from immunoglobulin superfamily domains	15/198	370/18800	9.30796e-06	8.08684e-05	4.61199e-05	FADD/RIPK3/BCL10/TNF/CD40/TRAF6/PRKCD/SMAD7/TNFRSF1B/NOD2/MAP3K7/TGFB1/TRAF2/RIPK2/MALT1	15	-1.29099
BP	GO:1903205	regulation of hydrogen peroxide-induced cell death	5/198	28/18800	9.94215e-06	8.61732e-05	4.91452e-05	PARK7/HDAC6/PINK1/RIPK1/FOXO3	5	-0.447214
BP	GO:0002756	MyD88-independent toll-like receptor signaling pathway	4/198	14/18800	1.10003e-05	9.51186e-05	5.42469e-05	TICAM1/CD40/TLR3/TRAF3	4	-1
BP	GO:0035270	endocrine system development	9/198	132/18800	1.10496e-05	9.53195e-05	5.43615e-05	BAK1/TGFBR1/BMP2/BAD/MAPK1/AKT1/RAF1/BMPR1A/MAPK3	9	-0.333333
BP	GO:0048762	mesenchymal cell differentiation	12/198	244/18800	1.11996e-05	9.61584e-05	5.48399e-05	BCL2/TGFBR1/BMP2/SMAD7/PTEN/MAPK1/TGFB1/BMPR1A/MAPK3/PPP2CA/TGFBR2/FN1	12	0
BP	GO:0050851	antigen receptor-mediated signaling pathway	12/198	244/18800	1.11996e-05	9.61584e-05	5.48399e-05	BCL2/BCL10/IKBKB/TRAF6/RELA/IKBKG/UBE2N/MAPK1/MAP3K7/RIPK2/MALT1/BAX	12	-1.1547
BP	GO:1902175	regulation of oxidative stress-induced intrinsic apoptotic signaling pathway	5/198	29/18800	1.19111e-05	0.000101788	5.80508e-05	HTRA2/PARK7/HSPB1/PINK1/AKT1	5	-1.34164
BP	GO:1903203	regulation of oxidative stress-induced neuron death	5/198	29/18800	1.19111e-05	0.000101788	5.80508e-05	GFER/TNF/FBXO7/PARK7/PINK1	5	-2.23607
BP	GO:0010862	positive regulation of pathway-restricted SMAD protein phosphorylation	6/198	49/18800	1.21354e-05	0.000103462	5.90054e-05	TGFBR1/BMP2/BMPR2/TGFB1/BMPR1A/TGFBR2	6	0
BP	GO:0007346	regulation of mitotic cell cycle	17/198	478/18800	1.30444e-05	0.000110953	6.32776e-05	BCL2/DDX3X/TNF/BID/FBXO7/AMBRA1/PTEN/AKT1/ADAMTS1/PIDD1/CRADD/UBE2E2/PPP2CA/PKD2/CASP2/USP2/IL1A	17	0.727607
BP	GO:0002699	positive regulation of immune effector process	12/198	248/18800	1.31828e-05	0.000111649	6.36742e-05	FADD/BCL10/TICAM1/TNF/CD40/TRAF6/NOD2/MAP3K7/TGFB1/TRAF2/RIPK2/MALT1	12	-0.57735
BP	GO:0072331	signal transduction by p53 class mediator	10/198	170/18800	1.31873e-05	0.000111649	6.36742e-05	BCL2/UBB/AKT1/PIDD1/CASP6/CRADD/FOXO3/CASP2/USP2/BAX	10	1.89737
BP	GO:0043457	regulation of cellular respiration	6/198	50/18800	1.36702e-05	0.000115202	6.57006e-05	TNF/VCP/PARK7/PINK1/PPIF/COX7A2L	6	-0.816497
BP	GO:1902041	regulation of extrinsic apoptotic signaling pathway via death domain receptors	6/198	50/18800	1.36702e-05	0.000115202	6.57006e-05	DDX3X/BCL2L1/PARK7/CFLAR/PTEN/RAF1	6	-1.63299
BP	GO:0051099	positive regulation of binding	10/198	171/18800	1.38798e-05	0.000116699	6.65544e-05	TICAM1/BMP2/TRAF6/PARK7/TGFB1/RIPK2/NGF/CAV1/PPP2CA/MMP9	10	0.632456
BP	GO:0070498	interleukin-1-mediated signaling pathway	5/198	30/18800	1.41716e-05	0.000118335	6.74873e-05	IKBKB/TRAF6/RELA/MAP3K7/MAPK3	5	-0.447214
BP	GO:0090151	establishment of protein localization to mitochondrial membrane	5/198	30/18800	1.41716e-05	0.000118335	6.74873e-05	HSP90AA1/TOMM22/COX18/HSPA4/BAX	5	0.447214
BP	GO:1902914	regulation of protein polyubiquitination	5/198	30/18800	1.41716e-05	0.000118335	6.74873e-05	DDX3X/UBE2D1/XIAP/UBE2N/NOD2	5	-2.23607
BP	GO:0034766	negative regulation of ion transmembrane transport	8/198	104/18800	1.42659e-05	0.00011885	6.77808e-05	TNF/SUMO1/PPIF/CAV1/PKD2/COMMD1/MMP9/VDAC1	8	1.41421
BP	GO:0051222	positive regulation of protein transport	13/198	293/18800	1.44832e-05	0.000120385	6.86566e-05	TNF/UBE2D3/PRKCD/HTRA2/BAD/UBE2L3/PINK1/TARDBP/TGFB1/FIS1/DNM1L/IL1A/TOMM7	13	-0.27735
BP	GO:0032635	interleukin-6 production	10/198	172/18800	1.46034e-05	0.000120834	6.89124e-05	BCL10/TICAM1/TNF/TLR3/TRAF6/NOD2/RIPK2/NOD1/SYT11/IL1A	10	-0.632456
BP	GO:0032675	regulation of interleukin-6 production	10/198	172/18800	1.46034e-05	0.000120834	6.89124e-05	BCL10/TICAM1/TNF/TLR3/TRAF6/NOD2/RIPK2/NOD1/SYT11/IL1A	10	-0.632456
BP	GO:0010951	negative regulation of endopeptidase activity	12/198	251/18800	1.48656e-05	0.000122541	6.98863e-05	DDX3X/TNF/BIRC6/XIAP/PARK7/AKT1/RAF1/NGF/CARD8/MMP9/BIRC5/BIRC3	12	0.57735
BP	GO:0010421	hydrogen peroxide-mediated programmed cell death	4/198	15/18800	1.48769e-05	0.000122541	6.98863e-05	PARK7/HDAC6/PINK1/FOXO3	4	-1
BP	GO:0050679	positive regulation of epithelial cell proliferation	11/198	211/18800	1.52231e-05	0.000125111	7.13517e-05	TNF/TGFBR1/BMP2/BAD/CFLAR/BMPR2/NOD2/AKT1/BMPR1A/HTRA1/MMP12	11	-0.904534
BP	GO:0051384	response to glucocorticoid	9/198	139/18800	1.67528e-05	0.000136152	7.76484e-05	BCL2/CASP9/TNF/BAD/CFLAR/CASP3/UBE2L3/FOXO3/PPARGC1B	9	-1.66667
BP	GO:0001782	B cell homeostasis	5/198	31/18800	1.67531e-05	0.000136152	7.76484e-05	BAK1/BCL2/BCL10/CASP3/BAX	5	-1.34164
BP	GO:0033137	negative regulation of peptidyl-serine phosphorylation	5/198	31/18800	1.67531e-05	0.000136152	7.76484e-05	BAK1/SMAD7/PTEN/CAV1/BAX	5	-0.447214
BP	GO:0060390	regulation of SMAD protein signal transduction	5/198	31/18800	1.67531e-05	0.000136152	7.76484e-05	TGFBR1/BMP2/BMPR2/TGFB1/BMPR1A	5	-0.447214
BP	GO:1902042	negative regulation of extrinsic apoptotic signaling pathway via death domain receptors	5/198	31/18800	1.67531e-05	0.000136152	7.76484e-05	DDX3X/BCL2L1/PARK7/CFLAR/RAF1	5	-1.34164
BP	GO:0002429	immune response-activating cell surface receptor signaling pathway	13/198	300/18800	1.8581e-05	0.000150337	8.57386e-05	BCL2/BCL10/IKBKB/TRAF6/RELA/IKBKG/PRKCD/UBE2N/MAPK1/MAP3K7/RIPK2/MALT1/BAX	13	-1.38675
BP	GO:0002757	immune response-activating signal transduction	13/198	300/18800	1.8581e-05	0.000150337	8.57386e-05	BCL2/BCL10/IKBKB/TRAF6/RELA/IKBKG/PRKCD/UBE2N/MAPK1/MAP3K7/RIPK2/MALT1/BAX	13	-1.38675
BP	GO:0034763	negative regulation of transmembrane transport	9/198	141/18800	1.87822e-05	0.000151629	8.6475e-05	TNF/SUMO1/AKT1/PPIF/CAV1/PKD2/COMMD1/MMP9/VDAC1	9	1.66667
BP	GO:0034349	glial cell apoptotic process	4/198	16/18800	1.96726e-05	0.000156848	8.94514e-05	CASP9/PRKCD/CASP3/TRAF2	4	-1
BP	GO:0045651	positive regulation of macrophage differentiation	4/198	16/18800	1.96726e-05	0.000156848	8.94514e-05	FADD/CASP8/RIPK1/TGFB1	4	0
BP	GO:0097468	programmed cell death in response to reactive oxygen species	4/198	16/18800	1.96726e-05	0.000156848	8.94514e-05	PARK7/HDAC6/PINK1/FOXO3	4	-1
BP	GO:0036474	cell death in response to hydrogen peroxide	5/198	32/18800	1.96865e-05	0.000156848	8.94514e-05	PARK7/HDAC6/PINK1/RIPK1/FOXO3	5	-0.447214
BP	GO:0051443	positive regulation of ubiquitin-protein transferase activity	5/198	32/18800	1.96865e-05	0.000156848	8.94514e-05	STUB1/UBE2N/PTEN/UBE2L3/PINK1	5	-2.23607
BP	GO:1903955	positive regulation of protein targeting to mitochondrion	5/198	32/18800	1.96865e-05	0.000156848	8.94514e-05	UBE2D3/HTRA2/UBE2L3/PINK1/TOMM7	5	-1.34164
BP	GO:0010498	proteasomal protein catabolic process	17/198	496/18800	2.0941e-05	0.000166479	9.49442e-05	VCP/UBE2D3/UBB/STUB1/UBE2G2/SUMO1/PARK7/RNF41/SMAD7/PINK1/UBE2G1/AKT1/CAV1/COMMD1/ATXN3/PSMD4/SHARPIN	17	-1.21268
BP	GO:0002062	chondrocyte differentiation	8/198	110/18800	2.15038e-05	0.000169476	9.66536e-05	COMP/TGFBR1/BMP2/BMPR2/SMAD7/TGFB1/BMPR1A/TGFBR2	8	-0.707107
BP	GO:0032611	interleukin-1 beta production	8/198	110/18800	2.15038e-05	0.000169476	9.66536e-05	CASP8/TNF/HSPB1/NOD2/RIPK2/CARD8/NOD1/MALT1	8	0
BP	GO:0032651	regulation of interleukin-1 beta production	8/198	110/18800	2.15038e-05	0.000169476	9.66536e-05	CASP8/TNF/HSPB1/NOD2/RIPK2/CARD8/NOD1/MALT1	8	0
BP	GO:1901222	regulation of NIK/NF-kappaB signaling	8/198	110/18800	2.15038e-05	0.000169476	9.66536e-05	DDX3X/TNF/TLR3/TRAF6/RELA/TRADD/NOD2/NOD1	8	-2.12132
BP	GO:0070374	positive regulation of ERK1 and ERK2 cascade	11/198	220/18800	2.24491e-05	0.000176545	0.000100685	TNF/BMP2/CFLAR/PTEN/NOD2/TGFB1/RIPK2/MAPK3/NOD1/MAP2K7/IL1A	11	0.301511
BP	GO:0010466	negative regulation of peptidase activity	12/198	262/18800	2.27492e-05	0.00017852	0.000101811	DDX3X/TNF/BIRC6/XIAP/PARK7/AKT1/RAF1/NGF/CARD8/MMP9/BIRC5/BIRC3	12	0.57735
BP	GO:0036475	neuron death in response to oxidative stress	5/198	33/18800	2.30046e-05	0.000180137	0.000102733	GFER/TNF/FBXO7/PARK7/PINK1	5	-2.23607
BP	GO:0051054	positive regulation of DNA metabolic process	12/198	263/18800	2.36199e-05	0.000184559	0.000105255	GFER/TNF/HSP90AA1/CD40/PRKCD/UBE2N/MAPK1/AKT1/TGFB1/MAPK3/MAP2K7/BAX	12	-0.57735
BP	GO:0032640	tumor necrosis factor production	10/198	182/18800	2.38192e-05	0.000185323	0.000105691	FADD/TICAM1/TLR3/HSPB1/NOD2/RIPK1/RIPK2/NOD1/SYT11/IL1A	10	0
BP	GO:0032680	regulation of tumor necrosis factor production	10/198	182/18800	2.38192e-05	0.000185323	0.000105691	FADD/TICAM1/TLR3/HSPB1/NOD2/RIPK1/RIPK2/NOD1/SYT11/IL1A	10	0
BP	GO:0030522	intracellular receptor signaling pathway	12/198	264/18800	2.45194e-05	0.000190364	0.000108566	ESRRA/BMP2/TRAF6/XIAP/RELA/PARK7/HDAC6/NOD2/MAP3K7/RIPK2/PPARGC1B/BIRC3	12	-1.1547
BP	GO:1904951	positive regulation of establishment of protein localization	13/198	309/18800	2.53228e-05	0.000196185	0.000111886	TNF/UBE2D3/PRKCD/HTRA2/BAD/UBE2L3/PINK1/TARDBP/TGFB1/FIS1/DNM1L/IL1A/TOMM7	13	-0.27735
BP	GO:0071732	cellular response to nitric oxide	4/198	17/18800	2.55141e-05	0.000197248	0.000112492	MMP3/CFLAR/TRAF2/FOXO1	4	0
BP	GO:0010639	negative regulation of organelle organization	14/198	356/18800	2.60478e-05	0.000200948	0.000114602	SLC25A6/BCL2L1/PRKCD/HDAC6/RNF41/PINK1/AKT1/BECN1/SLC25A5/PPIF/GSN/OPA1/PARL/SLC25A4	14	0.534522
BP	GO:0043276	anoikis	5/198	34/18800	2.67414e-05	0.000205864	0.000117406	BCL2/IKBKG/AKT1/MAP3K7/CAV1	5	0.447214
BP	GO:0002440	production of molecular mediator of immune response	13/198	312/18800	2.80031e-05	0.000215122	0.000122686	BCL10/TICAM1/TNF/CD40/TLR3/TRAF6/SMAD7/TNFRSF1B/NOD2/MAP3K7/TGFB1/TRAF2/MALT1	13	-1.38675
BP	GO:0032608	interferon-beta production	6/198	57/18800	2.93659e-05	0.000224176	0.000127849	TICAM1/DDX3X/HSP90AA1/TLR3/RIPK2/TRAF3	6	-0.816497
BP	GO:0032648	regulation of interferon-beta production	6/198	57/18800	2.93659e-05	0.000224176	0.000127849	TICAM1/DDX3X/HSP90AA1/TLR3/RIPK2/TRAF3	6	-0.816497
BP	GO:0032768	regulation of monooxygenase activity	6/198	57/18800	2.93659e-05	0.000224176	0.000127849	TNF/PARK7/AKT1/CAV1/NOD1/IL1A	6	0.816497
BP	GO:0051896	regulation of protein kinase B signaling	10/198	187/18800	3.00536e-05	0.000228947	0.00013057	TNF/TGFBR1/HSP90AA1/PARK7/RNF41/PTEN/PINK1/TGFB1/PPP2CA/HAX1	10	-1.26491
BP	GO:0098586	cellular response to virus	7/198	85/18800	3.18728e-05	0.000242299	0.000138185	DDX3X/HSP90AA1/CHUK/TLR3/BAX/BIRC3/MMP12	7	-0.377964
BP	GO:0035967	cellular response to topologically incorrect protein	8/198	117/18800	3.36168e-05	0.000255027	0.000145444	BAK1/VCP/STUB1/PPP1R15B/HDAC6/OPTN/ATXN3/BAX	8	-0.707107
BP	GO:0050670	regulation of lymphocyte proliferation	11/198	230/18800	3.37946e-05	0.000255844	0.00014591	BCL2/FADD/RIPK3/TICAM1/CD40/TRAF6/TNFRSF1B/CASP3/RIPK2/TGFBR2/IL1A	11	-1.50756
BP	GO:2000134	negative regulation of G1/S transition of mitotic cell cycle	7/198	86/18800	3.43909e-05	0.000259556	0.000148027	BCL2/FBXO7/PTEN/PIDD1/CRADD/PKD2/CASP2	7	0.377964
BP	GO:1901654	response to ketone	10/198	190/18800	3.44272e-05	0.000259556	0.000148027	CASP9/BCL2L1/FDX1/BAD/PARK7/CFLAR/AKT1/TGFB1/CAV1/FOXO3	10	-0.632456
BP	GO:1903749	positive regulation of establishment of protein localization to mitochondrion	5/198	36/18800	3.56167e-05	0.00026797	0.000152825	UBE2D3/HTRA2/UBE2L3/PINK1/TOMM7	5	-1.34164
BP	GO:1902893	regulation of miRNA transcription	6/198	59/18800	3.58313e-05	0.00026903	0.00015343	TNF/BMP2/RELA/TGFB1/BMPR1A/FOXO3	6	0
BP	GO:0071248	cellular response to metal ion	10/198	191/18800	3.60011e-05	0.00026975	0.00015384	CHUK/SUMO1/MAPK1/AKT1/BECN1/PPIF/MAPK3/PKD2/SYT11/MMP9	10	1.26491
BP	GO:1990542	mitochondrial transmembrane transport	7/198	87/18800	3.70703e-05	0.000277191	0.000158084	SLC25A6/SLC25A5/TOMM20/VDAC1/TOMM40/TOMM7/SLC25A4	7	1.88982
BP	GO:0032944	regulation of mononuclear cell proliferation	11/198	233/18800	3.80421e-05	0.000283877	0.000161897	BCL2/FADD/RIPK3/TICAM1/CD40/TRAF6/TNFRSF1B/CASP3/RIPK2/TGFBR2/IL1A	11	-1.50756
BP	GO:0043506	regulation of JUN kinase activity	6/198	60/18800	3.94666e-05	0.000293307	0.000167275	MAP3K5/TNF/TRAF6/MAP3K7/TRAF2/MAP2K7	6	0
BP	GO:0061614	miRNA transcription	6/198	60/18800	3.94666e-05	0.000293307	0.000167275	TNF/BMP2/RELA/TGFB1/BMPR1A/FOXO3	6	0
BP	GO:0003176	aortic valve development	5/198	37/18800	4.08317e-05	0.000302512	0.000172525	TNFRSF1A/BMP2/BMPR2/TNFRSF1B/TGFB1	5	-1.34164
BP	GO:0055070	copper ion homeostasis	4/198	19/18800	4.0871e-05	0.000302512	0.000172525	XIAP/SCO1/COMMD1/COX19	4	1
BP	GO:0009895	negative regulation of catabolic process	13/198	324/18800	4.13675e-05	0.000305567	0.000174267	BCL2/TNF/TAB2/RELA/PARK7/RNF41/PINK1/AKT1/BECN1/TARDBP/TRAF2/LRPPRC/TRAF5	13	-0.27735
BP	GO:0090316	positive regulation of intracellular protein transport	9/198	156/18800	4.18021e-05	0.000308153	0.000175742	UBE2D3/PRKCD/HTRA2/UBE2L3/PINK1/TARDBP/TGFB1/FIS1/TOMM7	9	-0.333333
BP	GO:0071482	cellular response to light stimulus	8/198	121/18800	4.27947e-05	0.000314835	0.000179553	MMP1/BAK1/CASP9/MMP3/PRKCD/MMP9/BAX/MMP2	8	-0.707107
BP	GO:1903578	regulation of ATP metabolic process	7/198	89/18800	4.29445e-05	0.0003153	0.000179818	TNF/VCP/PINK1/PPIF/COX7A2L/FIS1/DNM1L	7	0.377964
BP	GO:0045428	regulation of nitric oxide biosynthetic process	6/198	61/18800	4.33918e-05	0.000317945	0.000181327	TICAM1/TNF/HSP90AA1/AKT1/CAV1/PKD2	6	0
BP	GO:0031960	response to corticosteroid	9/198	157/18800	4.3946e-05	0.000320718	0.000182908	BCL2/CASP9/TNF/BAD/CFLAR/CASP3/UBE2L3/FOXO3/PPARGC1B	9	-1.66667
BP	GO:1903364	positive regulation of cellular protein catabolic process	9/198	157/18800	4.3946e-05	0.000320718	0.000182908	HSP90AA1/VCP/STUB1/SUMO1/SMAD7/PTEN/AKT1/CAV1/ATXN3	9	-1
BP	GO:0035304	regulation of protein dephosphorylation	7/198	91/18800	4.95613e-05	0.000360977	0.000205868	TNF/IKBKB/AMBRA1/PRKCD/PPP1R15B/PINK1/TGFB1	7	-1.88982
BP	GO:0032495	response to muramyl dipeptide	4/198	20/18800	5.06689e-05	0.000366847	0.000209216	RELA/NOD2/RIPK2/NOD1	4	0
BP	GO:0070584	mitochondrion morphogenesis	4/198	20/18800	5.06689e-05	0.000366847	0.000209216	BCL2L1/FIS1/DNM1L/BAX	4	1
BP	GO:1903204	negative regulation of oxidative stress-induced neuron death	4/198	20/18800	5.06689e-05	0.000366847	0.000209216	GFER/FBXO7/PARK7/PINK1	4	-2
BP	GO:0009267	cellular response to starvation	9/198	160/18800	5.09437e-05	0.000368106	0.000209934	BCL2/MAP3K5/FAS/BMPR2/MAPK1/BECN1/MAPK3/FOXO3/FOXO1	9	-0.333333
BP	GO:0032615	interleukin-12 production	6/198	63/18800	5.21796e-05	0.000375549	0.000214178	CD40/TLR3/TRAF6/RELA/NOD2/RIPK2	6	-1.63299
BP	GO:0032655	regulation of interleukin-12 production	6/198	63/18800	5.21796e-05	0.000375549	0.000214178	CD40/TLR3/TRAF6/RELA/NOD2/RIPK2	6	-1.63299
BP	GO:0032728	positive regulation of interferon-beta production	5/198	39/18800	5.30199e-05	0.000380097	0.000216772	TICAM1/DDX3X/HSP90AA1/TLR3/RIPK2	5	-1.34164
BP	GO:1901031	regulation of response to reactive oxygen species	5/198	39/18800	5.30199e-05	0.000380097	0.000216772	PARK7/HDAC6/PINK1/RIPK1/FOXO3	5	-0.447214
BP	GO:0080164	regulation of nitric oxide metabolic process	6/198	64/18800	5.70775e-05	0.000407899	0.000232628	TICAM1/TNF/HSP90AA1/AKT1/CAV1/PKD2	6	0
BP	GO:0003206	cardiac chamber morphogenesis	8/198	126/18800	5.71215e-05	0.000407899	0.000232628	TGFBR1/BMP2/BMPR2/SMAD7/TGFB1/ADAMTS1/BMPR1A/TGFBR2	8	0
BP	GO:0070371	ERK1 and ERK2 cascade	13/198	335/18800	5.81994e-05	0.000414784	0.000236555	TNF/BMP2/CFLAR/PTEN/NOD2/MAPK1/TGFB1/RIPK2/MAPK3/NOD1/MAP2K7/IL1A/FN1	13	0.27735
BP	GO:0042113	B cell activation	13/198	336/18800	5.99898e-05	0.000426516	0.000243245	BAK1/BCL2/TICAM1/CASP8/CD40/PRKCD/BAD/CASP3/NOD2/SLC25A5/TGFB1/MALT1/BAX	13	-1.38675
BP	GO:0000266	mitochondrial fission	5/198	40/18800	6.00793e-05	0.000426516	0.000243245	PGAM5/PINK1/OPA1/FIS1/DNM1L	5	0.447214
BP	GO:0071731	response to nitric oxide	4/198	21/18800	6.20767e-05	0.000438988	0.000250358	MMP3/CFLAR/TRAF2/FOXO1	4	0
BP	GO:0090141	positive regulation of mitochondrial fission	4/198	21/18800	6.20767e-05	0.000438988	0.000250358	PGAM5/PINK1/FIS1/DNM1L	4	0
BP	GO:0042098	T cell proliferation	10/198	204/18800	6.27794e-05	0.000443099	0.000252702	FADD/RIPK3/TRAF6/TNFRSF1B/CASP3/RIPK2/MALT1/TGFBR2/IL1A/BAX	10	0
BP	GO:0001701	in utero embryonic development	14/198	387/18800	6.44141e-05	0.000453759	0.000258782	CASP8/TGFBR1/BCL2L1/BMP2/BIRC6/TRAF6/MFN2/OTUD7B/TAB1/MAPK1/AKT1/BMPR1A/PKD2/TGFBR2	14	-1.60357
BP	GO:0032612	interleukin-1 production	8/198	129/18800	6.74895e-05	0.000472437	0.000269434	CASP8/TNF/HSPB1/NOD2/RIPK2/CARD8/NOD1/MALT1	8	0
BP	GO:0032652	regulation of interleukin-1 production	8/198	129/18800	6.74895e-05	0.000472437	0.000269434	CASP8/TNF/HSPB1/NOD2/RIPK2/CARD8/NOD1/MALT1	8	0
BP	GO:2000058	regulation of ubiquitin-dependent protein catabolic process	9/198	166/18800	6.77879e-05	0.000472437	0.000269434	VCP/STUB1/SUMO1/PARK7/SMAD7/PTEN/AKT1/CAV1/COMMD1	9	-1
BP	GO:0045429	positive regulation of nitric oxide biosynthetic process	5/198	41/18800	6.78424e-05	0.000472437	0.000269434	TICAM1/TNF/HSP90AA1/AKT1/PKD2	5	-0.447214
BP	GO:0150077	regulation of neuroinflammatory response	5/198	41/18800	6.78424e-05	0.000472437	0.000269434	MMP3/TNF/TNFRSF1B/SYT11/MMP9	5	-0.447214
BP	GO:1905314	semi-lunar valve development	5/198	41/18800	6.78424e-05	0.000472437	0.000269434	TNFRSF1A/BMP2/BMPR2/TNFRSF1B/TGFB1	5	-1.34164
BP	GO:0032091	negative regulation of protein binding	7/198	96/18800	6.98245e-05	0.000484391	0.000276252	STUB1/PRKCD/PARK7/AKT1/MAPK3/CAV1/BAX	7	0.377964
BP	GO:1903321	negative regulation of protein modification by small protein conjugation or removal	7/198	96/18800	6.98245e-05	0.000484391	0.000276252	SQSTM1/RELA/PARK7/SMAD7/AKT1/USP4/CAV1	7	-0.377964
BP	GO:0003205	cardiac chamber development	9/198	167/18800	7.10064e-05	0.000491655	0.000280395	TGFBR1/BMP2/BMPR2/SMAD7/TAB1/TGFB1/ADAMTS1/BMPR1A/TGFBR2	9	-0.333333
BP	GO:0070936	protein K48-linked ubiquitination	6/198	67/18800	7.40126e-05	0.0005115	0.000291712	UBE2D1/UBE2D3/UBE2G2/UBE2G1/UBE2E2/UBE2D2	6	-0.816497
BP	GO:1902807	negative regulation of cell cycle G1/S phase transition	7/198	97/18800	7.45925e-05	0.000514533	0.000293442	BCL2/FBXO7/PTEN/PIDD1/CRADD/PKD2/CASP2	7	0.377964
BP	GO:0033617	mitochondrial cytochrome c oxidase assembly	4/198	22/18800	7.52484e-05	0.000517102	0.000294907	SURF1/COX18/SCO1/COX19	4	2
BP	GO:0071218	cellular response to misfolded protein	4/198	22/18800	7.52484e-05	0.000517102	0.000294907	VCP/STUB1/HDAC6/ATXN3	4	-1
BP	GO:0050999	regulation of nitric-oxide synthase activity	5/198	42/18800	7.63563e-05	0.000522747	0.000298126	TNF/AKT1/CAV1/NOD1/IL1A	5	1.34164
BP	GO:0060412	ventricular septum morphogenesis	5/198	42/18800	7.63563e-05	0.000522747	0.000298126	TGFBR1/BMPR2/SMAD7/BMPR1A/TGFBR2	5	-0.447214
BP	GO:1900180	regulation of protein localization to nucleus	8/198	132/18800	7.93758e-05	0.000542401	0.000309335	PRKCD/SUMO1/PARK7/OTUD7B/AKT1/TARDBP/TGFB1/MAGED1	8	0
BP	GO:1904063	negative regulation of cation transmembrane transport	7/198	98/18800	7.96229e-05	0.000543073	0.000309718	SUMO1/PPIF/CAV1/PKD2/COMMD1/MMP9/VDAC1	7	1.88982
BP	GO:0060284	regulation of cell development	16/198	500/18800	8.29805e-05	0.000564918	0.000322177	BCL2/TNF/TNFRSF1A/BMP2/IKBKB/BAD/BMPR2/SMAD7/PTEN/TNFRSF1B/AKT1/TGFB1/BMPR1A/NGF/IL1A/FN1	16	-1
BP	GO:1903844	regulation of cellular response to transforming growth factor beta stimulus	8/198	133/18800	8.37041e-05	0.000568783	0.000324381	BMP2/STUB1/CFLAR/SMAD7/TGFB1/CAV1/HTRA1/HTRA3	8	0
BP	GO:1904407	positive regulation of nitric oxide metabolic process	5/198	43/18800	8.56695e-05	0.000581056	0.000331381	TICAM1/TNF/HSP90AA1/AKT1/PKD2	5	-0.447214
BP	GO:0043467	regulation of generation of precursor metabolites and energy	8/198	134/18800	8.82264e-05	0.000596182	0.000340007	TNF/VCP/PARK7/PINK1/AKT1/PPIF/COX7A2L/NDUFA4	8	0
BP	GO:1903052	positive regulation of proteolysis involved in cellular protein catabolic process	8/198	134/18800	8.82264e-05	0.000596182	0.000340007	VCP/STUB1/SUMO1/SMAD7/PTEN/AKT1/CAV1/ATXN3	8	-0.707107
BP	GO:0045861	negative regulation of proteolysis	13/198	350/18800	9.05745e-05	0.000610917	0.000348411	DDX3X/TNF/BIRC6/XIAP/PARK7/HDAC6/AKT1/RAF1/NGF/CARD8/MMP9/BIRC5/BIRC3	13	0.27735
BP	GO:0090101	negative regulation of transmembrane receptor protein serine/threonine kinase signaling pathway	8/198	135/18800	9.29495e-05	0.00062578	0.000356887	UBE2D1/BMP2/UBE2D3/STUB1/SMAD7/CAV1/HTRA1/HTRA3	8	-0.707107
BP	GO:0032722	positive regulation of chemokine production	6/198	70/18800	9.47319e-05	0.000636605	0.000363061	TICAM1/DDX3X/TNF/TLR3/NOD2/RIPK2	6	-1.63299
BP	GO:0032963	collagen metabolic process	7/198	101/18800	9.6399e-05	0.000646618	0.000368771	MMP1/MMP3/TGFB1/MMP9/MMP13/MMP2/MMP12	7	1.13389
BP	GO:0048771	tissue remodeling	9/198	174/18800	9.73415e-05	0.000651742	0.000371693	BAK1/TRAF6/BMPR2/TGFB1/CAV1/IL1A/PPARGC1B/BAX/MMP2	9	1
BP	GO:0010717	regulation of epithelial to mesenchymal transition	7/198	102/18800	0.000102591	0.000685631	0.000391021	TGFBR1/BMP2/SMAD7/PTEN/TGFB1/PPP2CA/TGFBR2	7	-0.377964
BP	GO:0032434	regulation of proteasomal ubiquitin-dependent protein catabolic process	8/198	137/18800	0.000103025	0.000687275	0.000391958	VCP/STUB1/SUMO1/PARK7/SMAD7/AKT1/CAV1/COMMD1	8	-0.707107
BP	GO:0003181	atrioventricular valve morphogenesis	4/198	24/18800	0.000107521	0.000712056	0.000406091	BMP2/BMPR2/BMPR1A/TGFBR2	4	0
BP	GO:0038095	Fc-epsilon receptor signaling pathway	4/198	24/18800	0.000107521	0.000712056	0.000406091	IKBKB/TRAF6/MAP3K7/MAP2K7	4	0
BP	GO:0045649	regulation of macrophage differentiation	4/198	24/18800	0.000107521	0.000712056	0.000406091	FADD/CASP8/RIPK1/TGFB1	4	0
BP	GO:0051788	response to misfolded protein	4/198	24/18800	0.000107521	0.000712056	0.000406091	VCP/STUB1/HDAC6/ATXN3	4	-1
BP	GO:0030217	T cell differentiation	11/198	263/18800	0.000112789	0.000745594	0.000425218	BCL2/FADD/RIPK3/AMBRA1/BAD/SMAD7/RIPK2/FOXO3/MALT1/TGFBR2/IL1A	11	-0.301511
BP	GO:0070372	regulation of ERK1 and ERK2 cascade	12/198	311/18800	0.000118508	0.000780432	0.000445086	TNF/BMP2/CFLAR/PTEN/NOD2/TGFB1/RIPK2/MAPK3/NOD1/MAP2K7/IL1A/FN1	12	0.57735
BP	GO:0035307	positive regulation of protein dephosphorylation	5/198	46/18800	0.000118915	0.000780432	0.000445086	AMBRA1/PRKCD/PPP1R15B/PINK1/TGFB1	5	-1.34164
BP	GO:0046677	response to antibiotic	5/198	46/18800	0.000118915	0.000780432	0.000445086	CASP9/CASP8/GFER/HSP90AA1/CASP3	5	-2.23607
BP	GO:0061383	trabecula morphogenesis	5/198	46/18800	0.000118915	0.000780432	0.000445086	TGFBR1/ADAMTS1/BMPR1A/PPARGC1B/MMP2	5	1.34164
BP	GO:0150076	neuroinflammatory response	6/198	73/18800	0.00011982	0.000782164	0.000446074	MMP3/TNF/TLR3/TNFRSF1B/SYT11/MMP9	6	-0.816497
BP	GO:2000573	positive regulation of DNA biosynthetic process	6/198	73/18800	0.00011982	0.000782164	0.000446074	GFER/TNF/HSP90AA1/MAPK1/MAPK3/MAP2K7	6	-0.816497
BP	GO:0045089	positive regulation of innate immune response	8/198	140/18800	0.000119822	0.000782164	0.000446074	FADD/HSP90AA1/IKBKB/TRAF6/NOD2/MAP3K7/CASP6/MMP12	8	-0.707107
BP	GO:0031330	negative regulation of cellular catabolic process	11/198	265/18800	0.000120576	0.00078568	0.000448079	BCL2/TAB2/PARK7/RNF41/PINK1/AKT1/BECN1/TARDBP/TRAF2/LRPPRC/TRAF5	11	0.301511
BP	GO:0030324	lung development	9/198	179/18800	0.000120801	0.000785742	0.000448115	TNF/BMPR2/TAB1/MAPK1/BMPR1A/AIMP2/MAPK3/TGFBR2/MMP12	9	0.333333
BP	GO:0030510	regulation of BMP signaling pathway	7/198	105/18800	0.000123135	0.00079922	0.000455801	UBE2D1/UBE2D3/XIAP/BMPR2/SMAD7/HTRA1/HTRA3	7	-1.13389
BP	GO:1901653	cellular response to peptide	13/198	361/18800	0.000123311	0.00079922	0.000455801	GFER/ESRRA/TNF/RELA/PRKCD/CFLAR/NOD2/AKT1/RIPK2/CAV1/NOD1/FOXO3/FOXO1	13	-0.27735
BP	GO:0048284	organelle fusion	8/198	141/18800	0.000125899	0.000811673	0.000462903	BAK1/MFN2/MFN1/SYT11/OPA1/FIS1/BAX/PARL	8	1.41421
BP	GO:0050671	positive regulation of lymphocyte proliferation	8/198	141/18800	0.000125899	0.000811673	0.000462903	BCL2/FADD/TICAM1/CD40/TRAF6/RIPK2/TGFBR2/IL1A	8	-0.707107
BP	GO:0070555	response to interleukin-1	8/198	141/18800	0.000125899	0.000811673	0.000462903	CD40/IKBKB/TRAF6/RELA/MAP3K7/RIPK2/MAPK3/MMP2	8	0
BP	GO:0032469	endoplasmic reticulum calcium ion homeostasis	4/198	25/18800	0.00012695	0.000817006	0.000465945	BAK1/BCL2/FIS1/BAX	4	0
BP	GO:0090287	regulation of cellular response to growth factor stimulus	12/198	314/18800	0.000129655	0.000828332	0.000472404	UBE2D1/BMP2/UBE2D3/STUB1/XIAP/CFLAR/BMPR2/SMAD7/TGFB1/CAV1/HTRA1/HTRA3	12	-1.1547
BP	GO:0060840	artery development	7/198	106/18800	0.000130682	0.000828332	0.000472404	COMP/TGFBR1/BMPR2/SMAD7/TAB1/BMPR1A/PKD2	7	-1.13389
BP	GO:0001542	ovulation from ovarian follicle	3/198	10/18800	0.000130753	0.000828332	0.000472404	ADAMTS1/FOXO3/MMP2	3	1.73205
BP	GO:0003330	regulation of extracellular matrix constituent secretion	3/198	10/18800	0.000130753	0.000828332	0.000472404	TNFRSF1A/BMP2/TNFRSF1B	3	-1.73205
BP	GO:0015851	nucleobase transport	3/198	10/18800	0.000130753	0.000828332	0.000472404	VDAC3/SLC25A5/SLC25A4	3	0.57735
BP	GO:0032025	response to cobalt ion	3/198	10/18800	0.000130753	0.000828332	0.000472404	CASP9/CASP8/CASP3	3	-1.73205
BP	GO:0043653	mitochondrial fragmentation involved in apoptotic process	3/198	10/18800	0.000130753	0.000828332	0.000472404	FIS1/DNM1L/BAX	3	1.73205
BP	GO:0060439	trachea morphogenesis	3/198	10/18800	0.000130753	0.000828332	0.000472404	MAPK1/MAPK3/TGFBR2	3	0.57735
BP	GO:1902884	positive regulation of response to oxidative stress	3/198	10/18800	0.000130753	0.000828332	0.000472404	HDAC6/RIPK1/FOXO3	3	0.57735
BP	GO:0043161	proteasome-mediated ubiquitin-dependent protein catabolic process	14/198	414/18800	0.000131305	0.000828672	0.000472598	VCP/UBE2D3/STUB1/UBE2G2/SUMO1/PARK7/SMAD7/UBE2G1/AKT1/CAV1/COMMD1/ATXN3/PSMD4/SHARPIN	14	-0.534522
BP	GO:0045619	regulation of lymphocyte differentiation	9/198	181/18800	0.000131424	0.000828672	0.000472598	FBXO7/AMBRA1/BAD/RNF41/SMAD7/RIPK2/FOXO3/MALT1/TGFBR2	9	-0.333333
BP	GO:0003197	endocardial cushion development	5/198	47/18800	0.000131943	0.000828672	0.000472598	TGFBR1/BMP2/BMPR2/BMPR1A/TGFBR2	5	-0.447214
BP	GO:0034198	cellular response to amino acid starvation	5/198	47/18800	0.000131943	0.000828672	0.000472598	MAP3K5/FAS/MAPK1/BECN1/MAPK3	5	-0.447214
BP	GO:0070849	response to epidermal growth factor	5/198	47/18800	0.000131943	0.000828672	0.000472598	CFLAR/MAPK1/AKT1/BECN1/MAPK3	5	0.447214
BP	GO:1901987	regulation of cell cycle phase transition	14/198	415/18800	0.000134648	0.000844212	0.00048146	BCL2/DDX3X/BID/FBXO7/AMBRA1/PTEN/AKT1/ADAMTS1/PIDD1/CRADD/UBE2E2/PPP2CA/PKD2/CASP2	14	0.534522
BP	GO:0032946	positive regulation of mononuclear cell proliferation	8/198	143/18800	0.00013882	0.000868803	0.000495485	BCL2/FADD/TICAM1/CD40/TRAF6/RIPK2/TGFBR2/IL1A	8	-0.707107
BP	GO:0006809	nitric oxide biosynthetic process	6/198	75/18800	0.000139285	0.000868803	0.000495485	TICAM1/TNF/HSP90AA1/AKT1/CAV1/PKD2	6	0
BP	GO:0051865	protein autoubiquitination	6/198	75/18800	0.000139285	0.000868803	0.000495485	UBE2D3/STUB1/TRAF6/RNF41/TRAF2/UBE2D2	6	-0.816497
BP	GO:0051348	negative regulation of transferase activity	11/198	270/18800	0.000142074	0.000884692	0.000504546	BMP2/FBXO7/PRKCD/PARK7/HSPB1/SMAD7/PTEN/CASP3/AKT1/CAV1/COX11	11	-1.50756
BP	GO:0030323	respiratory tube development	9/198	183/18800	0.000142818	0.000887807	0.000506323	TNF/BMPR2/TAB1/MAPK1/BMPR1A/AIMP2/MAPK3/TGFBR2/MMP12	9	0.333333
BP	GO:2000060	positive regulation of ubiquitin-dependent protein catabolic process	7/198	108/18800	0.000146902	0.000911639	0.000519915	VCP/STUB1/SUMO1/SMAD7/PTEN/AKT1/CAV1	7	-1.13389
BP	GO:0001783	B cell apoptotic process	4/198	26/18800	0.000148802	0.000917191	0.000523081	BAK1/BCL10/PTEN/BAX	4	-1
BP	GO:0002726	positive regulation of T cell cytokine production	4/198	26/18800	0.000148802	0.000917191	0.000523081	TRAF6/MAP3K7/TRAF2/MALT1	4	1
BP	GO:0008535	respiratory chain complex IV assembly	4/198	26/18800	0.000148802	0.000917191	0.000523081	SURF1/COX18/SCO1/COX19	4	2
BP	GO:0060561	apoptotic process involved in morphogenesis	4/198	26/18800	0.000148802	0.000917191	0.000523081	BAK1/TNFRSF1A/TNFRSF1B/BAX	4	-1
BP	GO:0051052	regulation of DNA metabolic process	15/198	472/18800	0.000149686	0.000921088	0.000525303	GFER/TNF/HSP90AA1/CD40/PRKCD/UBE2N/BMPR2/MAPK1/AKT1/TGFB1/APAF1/MAPK3/PPP2CA/MAP2K7/BAX	15	-0.258199
BP	GO:0031333	negative regulation of protein-containing complex assembly	8/198	145/18800	0.000152815	0.000938755	0.000535379	DDX3X/PRKCD/PARK7/HDAC6/RAF1/VDAC2/CARD8/GSN	8	0
BP	GO:0016311	dephosphorylation	14/198	422/18800	0.000160191	0.000982414	0.000560278	BCL2/RIPK3/TNF/PGAM5/BMP2/IKBKB/AMBRA1/PRKCD/PPP1R15B/PTEN/PINK1/TGFB1/PPP2CA/PPARGC1B	14	-2.13809
BP	GO:0022602	ovulation cycle process	5/198	49/18800	0.000161251	0.000983684	0.000561002	CASP3/ADAMTS1/FOXO3/CASP2/MMP2	5	1.34164
BP	GO:0030225	macrophage differentiation	5/198	49/18800	0.000161251	0.000983684	0.000561002	FADD/CASP8/RIPK1/TGFB1/MMP9	5	0.447214
BP	GO:1990928	response to amino acid starvation	5/198	49/18800	0.000161251	0.000983684	0.000561002	MAP3K5/FAS/MAPK1/BECN1/MAPK3	5	-0.447214
BP	GO:0051346	negative regulation of hydrolase activity	13/198	371/18800	0.000161476	0.000983684	0.000561002	DDX3X/TNF/IKBKB/BIRC6/XIAP/PARK7/AKT1/RAF1/NGF/CARD8/MMP9/BIRC5/BIRC3	13	0.27735
BP	GO:0071478	cellular response to radiation	9/198	187/18800	0.000168092	0.00102228	0.000583014	MMP1/BAK1/CASP9/MMP3/BCL2L1/PRKCD/MMP9/BAX/MMP2	9	-1
BP	GO:0003171	atrioventricular valve development	4/198	27/18800	0.000173248	0.00105013	0.000598899	BMP2/BMPR2/BMPR1A/TGFBR2	4	0
BP	GO:0006515	protein quality control for misfolded or incompletely synthesized proteins	4/198	27/18800	0.000173248	0.00105013	0.000598899	VCP/STUB1/HDAC6/ATXN3	4	-1
BP	GO:0071347	cellular response to interleukin-1	7/198	111/18800	0.000174257	0.0010545	0.000601388	CD40/IKBKB/TRAF6/RELA/MAP3K7/MAPK3/MMP2	7	-0.377964
BP	GO:1903053	regulation of extracellular matrix organization	5/198	50/18800	0.000177649	0.00106889	0.000609594	TNFRSF1A/BMP2/CFLAR/TNFRSF1B/TGFB1	5	-1.34164
BP	GO:0014889	muscle atrophy	3/198	11/18800	0.000178392	0.00106889	0.000609594	CFLAR/FOXO3/GSN	3	0.57735
BP	GO:0072584	caveolin-mediated endocytosis	3/198	11/18800	0.000178392	0.00106889	0.000609594	MAPK1/MAPK3/CAV1	3	0.57735
BP	GO:0097396	response to interleukin-17	3/198	11/18800	0.000178392	0.00106889	0.000609594	TRAF6/TRAF2/TRAF5	3	0.57735
BP	GO:0097398	cellular response to interleukin-17	3/198	11/18800	0.000178392	0.00106889	0.000609594	TRAF6/TRAF2/TRAF5	3	0.57735
BP	GO:0097400	interleukin-17-mediated signaling pathway	3/198	11/18800	0.000178392	0.00106889	0.000609594	TRAF6/TRAF2/TRAF5	3	0.57735
BP	GO:0048844	artery morphogenesis	6/198	79/18800	0.000185695	0.00111082	0.000633511	COMP/TGFBR1/BMPR2/SMAD7/BMPR1A/PKD2	6	-0.816497
BP	GO:0043433	negative regulation of DNA-binding transcription factor activity	9/198	190/18800	0.000189406	0.00113116	0.000645112	CAT/CHUK/SUMO1/SMAD7/NOD2/CARD8/TRAF3/PKD2/COMMD1	9	-0.333333
BP	GO:0060562	epithelial tube morphogenesis	12/198	328/18800	0.000194365	0.00115889	0.000660922	BCL2/BCL10/TNF/BMP2/TRAF6/CASP3/TGFB1/APAF1/MAGED1/PKD2/OPA1/TGFBR2	12	0
BP	GO:0043124	negative regulation of I-kappaB kinase/NF-kappaB signaling	5/198	51/18800	0.00019529	0.0011625	0.000662982	CASP8/OTUD7B/RIPK1/OPTN/CARD8	5	0.447214
BP	GO:0016049	cell growth	15/198	484/18800	0.00019648	0.00116768	0.000665936	BCL2/DDX3X/TGFBR1/HSP90AA1/HDAC6/BMPR2/SMAD7/AKT1/TGFB1/NGF/CTTN/PPP2CA/TGFBR2/FN1/TNC	15	0.258199
BP	GO:0048638	regulation of developmental growth	12/198	329/18800	0.000199891	0.00118602	0.000676395	BCL2/TGFBR1/HTRA2/BMPR2/SMAD7/PTEN/AKT1/BMPR1A/NGF/CTTN/TGFBR2/FN1	12	0
BP	GO:0003272	endocardial cushion formation	4/198	28/18800	0.000200465	0.0011875	0.000677238	TGFBR1/BMP2/BMPR1A/TGFBR2	4	0
BP	GO:0036294	cellular response to decreased oxygen levels	8/198	151/18800	0.000201941	0.0011943	0.000681118	BCL2/STUB1/BAD/CFLAR/PTEN/PINK1/AKT1/FOXO3	8	-1.41421
BP	GO:0048872	homeostasis of number of cells	11/198	282/18800	0.000207359	0.00122436	0.000698261	BAK1/BCL2/FADD/RIPK3/BCL10/FAS/CASP3/AKT1/SLC25A5/FOXO3/BAX	11	-0.904534
BP	GO:0033673	negative regulation of kinase activity	10/198	236/18800	0.000208031	0.00122634	0.000699392	BMP2/FBXO7/PRKCD/PARK7/HSPB1/PTEN/CASP3/AKT1/CAV1/COX11	10	-1.26491
BP	GO:0030512	negative regulation of transforming growth factor beta receptor signaling pathway	6/198	81/18800	0.000213073	0.00125202	0.000714036	BMP2/STUB1/SMAD7/CAV1/HTRA1/HTRA3	6	0
BP	GO:0046209	nitric oxide metabolic process	6/198	81/18800	0.000213073	0.00125202	0.000714036	TICAM1/TNF/HSP90AA1/AKT1/CAV1/PKD2	6	0
BP	GO:0038093	Fc receptor signaling pathway	5/198	52/18800	0.000214234	0.00125682	0.000716773	IKBKB/TRAF6/PRKCD/MAP3K7/MAP2K7	5	-0.447214
BP	GO:2001057	reactive nitrogen species metabolic process	6/198	82/18800	0.000227904	0.00133487	0.000761285	TICAM1/TNF/HSP90AA1/AKT1/CAV1/PKD2	6	0
BP	GO:1901800	positive regulation of proteasomal protein catabolic process	7/198	116/18800	0.0002289	0.00133855	0.000763386	VCP/STUB1/SUMO1/SMAD7/AKT1/CAV1/ATXN3	7	-0.377964
BP	GO:0036295	cellular response to increased oxygen levels	3/198	12/18800	0.000236012	0.00137354	0.00078334	FAS/CAV1/FOXO1	3	0.57735
BP	GO:1901029	negative regulation of mitochondrial outer membrane permeabilization involved in apoptotic signaling pathway	3/198	12/18800	0.000236012	0.00137354	0.00078334	SLC25A6/SLC25A5/SLC25A4	3	0.57735
BP	GO:1902337	regulation of apoptotic process involved in morphogenesis	3/198	12/18800	0.000236012	0.00137354	0.00078334	TNFRSF1A/TNFRSF1B/BAX	3	-0.57735
BP	GO:0042594	response to starvation	9/198	196/18800	0.000238821	0.00138767	0.000791399	BCL2/MAP3K5/FAS/BMPR2/MAPK1/BECN1/MAPK3/FOXO3/FOXO1	9	-0.333333
BP	GO:0032092	positive regulation of protein binding	6/198	83/18800	0.000243536	0.00141058	0.000804464	TICAM1/BMP2/RIPK2/CAV1/PPP2CA/MMP9	6	0.816497
BP	GO:0060395	SMAD protein signal transduction	6/198	83/18800	0.000243536	0.00141058	0.000804464	TGFBR1/BMP2/BMPR2/SMAD7/TGFB1/BMPR1A	6	-0.816497
BP	GO:0044772	mitotic cell cycle phase transition	14/198	440/18800	0.000245948	0.00142229	0.000811143	BCL2/DDX3X/BID/FBXO7/AMBRA1/PTEN/AKT1/ADAMTS1/PIDD1/CRADD/UBE2E2/PPP2CA/PKD2/CASP2	14	0.534522
BP	GO:0043500	muscle adaptation	7/198	118/18800	0.000254292	0.00146821	0.000837334	TNFRSF1A/CFLAR/TNFRSF1B/BECN1/FOXO3/GSN/FOXO1	7	0.377964
BP	GO:0032388	positive regulation of intracellular transport	9/198	198/18800	0.000257498	0.00148437	0.00084655	UBE2D3/PRKCD/HTRA2/UBE2L3/PINK1/TARDBP/TGFB1/FIS1/TOMM7	9	-0.333333
BP	GO:0010921	regulation of phosphatase activity	6/198	84/18800	0.00026	0.00149408	0.000852085	RIPK3/TNF/BMP2/IKBKB/PPP1R15B/PPARGC1B	6	-1.63299
BP	GO:0031397	negative regulation of protein ubiquitination	6/198	84/18800	0.00026	0.00149408	0.000852085	SQSTM1/PARK7/SMAD7/AKT1/USP4/CAV1	6	0
BP	GO:0090140	regulation of mitochondrial fission	4/198	30/18800	0.000263936	0.00151431	0.000863623	PGAM5/PINK1/FIS1/DNM1L	4	0
BP	GO:0051897	positive regulation of protein kinase B signaling	7/198	119/18800	0.000267812	0.00153173	0.000873559	TNF/TGFBR1/HSP90AA1/PARK7/PINK1/TGFB1/HAX1	7	-1.13389
BP	GO:2000278	regulation of DNA biosynthetic process	7/198	119/18800	0.000267812	0.00153173	0.000873559	GFER/TNF/HSP90AA1/BMPR2/MAPK1/MAPK3/MAP2K7	7	-1.13389
BP	GO:0006470	protein dephosphorylation	11/198	291/18800	0.000271621	0.00155109	0.000884596	BCL2/TNF/PGAM5/IKBKB/AMBRA1/PRKCD/PPP1R15B/PTEN/PINK1/TGFB1/PPP2CA	11	-2.11058
BP	GO:0010507	negative regulation of autophagy	6/198	85/18800	0.000277326	0.00157627	0.000898957	BCL2/TAB2/RNF41/PINK1/AKT1/BECN1	6	-0.816497
BP	GO:0072384	organelle transport along microtubule	6/198	85/18800	0.000277326	0.00157627	0.000898957	UBB/RHOT2/HDAC6/LRPPRC/RHOT1/OPA1	6	0
BP	GO:2000106	regulation of leukocyte apoptotic process	6/198	85/18800	0.000277326	0.00157627	0.000898957	FADD/RIPK3/BCL10/PTEN/NOD2/BAX	6	-1.63299
BP	GO:0003179	heart valve morphogenesis	5/198	55/18800	0.000279532	0.00158387	0.000903294	BMP2/BMPR2/TGFB1/BMPR1A/TGFBR2	5	0.447214
BP	GO:0042743	hydrogen peroxide metabolic process	5/198	55/18800	0.000279532	0.00158387	0.000903294	MMP3/CAT/PARK7/HDAC6/PINK1	5	-2.23607
BP	GO:0010332	response to gamma radiation	5/198	56/18800	0.000304339	0.00171435	0.000977708	BAK1/BCL2/BCL2L1/IL1A/BAX	5	-0.447214
BP	GO:0032494	response to peptidoglycan	3/198	13/18800	0.000304439	0.00171435	0.000977708	RELA/NOD2/RIPK2	3	-0.57735
BP	GO:1903054	negative regulation of extracellular matrix organization	3/198	13/18800	0.000304439	0.00171435	0.000977708	TNFRSF1A/TNFRSF1B/TGFB1	3	-0.57735
BP	GO:1904748	regulation of apoptotic process involved in development	3/198	13/18800	0.000304439	0.00171435	0.000977708	TNFRSF1A/TNFRSF1B/BAX	3	-0.57735
BP	GO:0060541	respiratory system development	9/198	203/18800	0.00030955	0.00174045	0.00099259	TNF/BMPR2/TAB1/MAPK1/BMPR1A/AIMP2/MAPK3/TGFBR2/MMP12	9	0.333333
BP	GO:0071901	negative regulation of protein serine/threonine kinase activity	7/198	122/18800	0.000311876	0.00175083	0.000998509	BMP2/FBXO7/PRKCD/PTEN/CASP3/AKT1/CAV1	7	-1.13389
BP	GO:0048511	rhythmic process	11/198	297/18800	0.000323208	0.00181166	0.0010332	TNF/PTEN/CASP3/TARDBP/ADAMTS1/MAGED1/FOXO3/CASP2/USP2/DNM1L/MMP2	11	1.50756
BP	GO:0001541	ovarian follicle development	5/198	57/18800	0.000330778	0.00184276	0.00105094	BCL2/BCL2L1/FOXO3/BAX/MMP2	5	0.447214
BP	GO:0001961	positive regulation of cytokine-mediated signaling pathway	5/198	57/18800	0.000330778	0.00184276	0.00105094	FADD/RIPK1/TRAF2/RIPK2/MMP12	5	1.34164
BP	GO:0043388	positive regulation of DNA binding	5/198	57/18800	0.000330778	0.00184276	0.00105094	TRAF6/PARK7/TGFB1/NGF/MMP9	5	0.447214
BP	GO:0070228	regulation of lymphocyte apoptotic process	5/198	57/18800	0.000330778	0.00184276	0.00105094	FADD/RIPK3/BCL10/PTEN/BAX	5	-1.34164
BP	GO:0030307	positive regulation of cell growth	8/198	163/18800	0.000339275	0.0018864	0.00107583	BCL2/DDX3X/TGFBR1/BMPR2/SMAD7/AKT1/NGF/FN1	8	-0.707107
BP	GO:0002063	chondrocyte development	4/198	32/18800	0.00034068	0.0018864	0.00107583	COMP/BMPR2/SMAD7/TGFBR2	4	-1
BP	GO:0032770	positive regulation of monooxygenase activity	4/198	32/18800	0.00034068	0.0018864	0.00107583	TNF/PARK7/AKT1/NOD1	4	0
BP	GO:0035456	response to interferon-beta	4/198	32/18800	0.00034068	0.0018864	0.00107583	TLR3/HTRA2/UBE2G2/XAF1	4	-1
BP	GO:0046661	male sex differentiation	8/198	164/18800	0.000353509	0.00195447	0.00111465	BCL2/TGFBR1/BCL2L1/UBB/TLR3/BMPR1A/IL1A/BAX	8	-0.707107
BP	GO:0030514	negative regulation of BMP signaling pathway	5/198	58/18800	0.000358921	0.00198139	0.00113	UBE2D1/UBE2D3/SMAD7/HTRA1/HTRA3	5	-0.447214
BP	GO:0051100	negative regulation of binding	8/198	165/18800	0.000368225	0.00202969	0.00115755	STUB1/PRKCD/SUMO1/PARK7/AKT1/MAPK3/CAV1/BAX	8	0
BP	GO:0003007	heart morphogenesis	10/198	254/18800	0.000373821	0.00205743	0.00117337	TGFBR1/BMP2/BMPR2/SMAD7/TAB1/TGFB1/ADAMTS1/BMPR1A/PKD2/TGFBR2	10	0
BP	GO:0001843	neural tube closure	6/198	90/18800	0.00037802	0.0020774	0.00118476	BCL10/TRAF6/CASP3/TGFB1/APAF1/OPA1	6	0
BP	GO:0070278	extracellular matrix constituent secretion	3/198	14/18800	0.000384468	0.00210649	0.00120135	TNFRSF1A/BMP2/TNFRSF1B	3	-1.73205
BP	GO:1901857	positive regulation of cellular respiration	3/198	14/18800	0.000384468	0.00210649	0.00120135	VCP/PARK7/PINK1	3	-1.73205
BP	GO:0002218	activation of innate immune response	5/198	59/18800	0.000388836	0.00212405	0.00121136	HSP90AA1/IKBKB/TRAF6/MAP3K7/CASP6	5	-0.447214
BP	GO:0002711	positive regulation of T cell mediated immunity	5/198	59/18800	0.000388836	0.00212405	0.00121136	FADD/TRAF6/MAP3K7/TRAF2/MALT1	5	0.447214
BP	GO:0045927	positive regulation of growth	10/198	256/18800	0.000397641	0.0021689	0.00123694	BCL2/DDX3X/TGFBR1/BMPR2/SMAD7/AKT1/BMPR1A/NGF/TGFBR2/FN1	10	0
BP	GO:0060606	tube closure	6/198	91/18800	0.000401206	0.00218507	0.00124616	BCL10/TRAF6/CASP3/TGFB1/APAF1/OPA1	6	0
BP	GO:0032409	regulation of transporter activity	11/198	305/18800	0.000404633	0.00220046	0.00125494	BCL2/PRKCD/SUMO1/PARK7/PINK1/PPIF/RIPK1/CAV1/PKD2/MMP9/NDUFA4	11	0.301511
BP	GO:0051205	protein insertion into membrane	5/198	60/18800	0.000420597	0.00228047	0.00130057	HSP90AA1/TOMM22/COX18/HSPA4/BAX	5	0.447214
BP	GO:0055008	cardiac muscle tissue morphogenesis	5/198	60/18800	0.000420597	0.00228047	0.00130057	TGFBR1/BMP2/SMAD7/TGFB1/BMPR1A	5	-0.447214
BP	GO:0032436	positive regulation of proteasomal ubiquitin-dependent protein catabolic process	6/198	92/18800	0.000425487	0.00230357	0.00131374	VCP/STUB1/SUMO1/SMAD7/AKT1/CAV1	6	-0.816497
BP	GO:0048639	positive regulation of developmental growth	8/198	169/18800	0.000432171	0.00232953	0.00132855	BCL2/BMPR2/SMAD7/AKT1/BMPR1A/NGF/TGFBR2/FN1	8	0.707107
BP	GO:0034405	response to fluid shear stress	4/198	34/18800	0.000432197	0.00232953	0.00132855	SMAD7/AKT1/PKD2/MMP2	4	1
BP	GO:0051973	positive regulation of telomerase activity	4/198	34/18800	0.000432197	0.00232953	0.00132855	HSP90AA1/MAPK1/MAPK3/MAP2K7	4	0
BP	GO:0001101	response to acid chemical	7/198	129/18800	0.000437517	0.00235472	0.00134291	TNF/BCL2L1/BAD/CASP3/TOMM20/PKD2/MMP2	7	-0.377964
BP	GO:0006469	negative regulation of protein kinase activity	9/198	213/18800	0.000439928	0.00236073	0.00134634	BMP2/FBXO7/PRKCD/PARK7/HSPB1/PTEN/CASP3/AKT1/CAV1	9	-1.66667
BP	GO:0031669	cellular response to nutrient levels	9/198	213/18800	0.000439928	0.00236073	0.00134634	BCL2/MAP3K5/FAS/BMPR2/MAPK1/BECN1/MAPK3/FOXO3/FOXO1	9	-0.333333
BP	GO:0045185	maintenance of protein location	6/198	93/18800	0.000450901	0.00241606	0.0013779	PARK7/PINK1/AKT1/CAV1/PKD2/GSN	6	0.816497
BP	GO:0017015	regulation of transforming growth factor beta receptor signaling pathway	7/198	130/18800	0.00045836	0.00245243	0.00139864	BMP2/STUB1/SMAD7/TGFB1/CAV1/HTRA1/HTRA3	7	0.377964
BP	GO:0050730	regulation of peptidyl-tyrosine phosphorylation	10/198	261/18800	0.000462778	0.00247244	0.00141005	TNF/TNFRSF1A/CD40/PRKCD/NOD2/TGFB1/RIPK2/CAV1/PPP2CA/HAX1	10	0
BP	GO:0002730	regulation of dendritic cell cytokine production	3/198	15/18800	0.000476866	0.00253246	0.00144428	TICAM1/TLR3/NOD2	3	-1.73205
BP	GO:0001657	ureteric bud development	6/198	94/18800	0.000477483	0.00253246	0.00144428	BCL2/CAT/BMP2/SMAD7/MAGED1/PKD2	6	-0.816497
BP	GO:0045582	positive regulation of T cell differentiation	6/198	94/18800	0.000477483	0.00253246	0.00144428	AMBRA1/BAD/RIPK2/FOXO3/MALT1/TGFBR2	6	0.816497
BP	GO:1901655	cellular response to ketone	6/198	94/18800	0.000477483	0.00253246	0.00144428	CASP9/FDX1/PARK7/CFLAR/AKT1/FOXO3	6	-0.816497
BP	GO:1904035	regulation of epithelial cell apoptotic process	6/198	94/18800	0.000477483	0.00253246	0.00144428	TNF/CD40/BAD/CFLAR/FOXO3/GSN	6	-0.816497
BP	GO:0016242	negative regulation of macroautophagy	4/198	35/18800	0.000483974	0.00255945	0.00145967	RNF41/PINK1/AKT1/BECN1	4	0
BP	GO:1905898	positive regulation of response to endoplasmic reticulum stress	4/198	35/18800	0.000483974	0.00255945	0.00145967	BAK1/CAV1/ATXN3/BAX	4	1
BP	GO:0032088	negative regulation of NF-kappaB transcription factor activity	6/198	95/18800	0.00050527	0.0026605	0.00151731	CAT/CHUK/NOD2/CARD8/TRAF3/COMMD1	6	0
BP	GO:0072163	mesonephric epithelium development	6/198	95/18800	0.00050527	0.0026605	0.00151731	BCL2/CAT/BMP2/SMAD7/MAGED1/PKD2	6	-0.816497
BP	GO:0072164	mesonephric tubule development	6/198	95/18800	0.00050527	0.0026605	0.00151731	BCL2/CAT/BMP2/SMAD7/MAGED1/PKD2	6	-0.816497
BP	GO:0002685	regulation of leukocyte migration	9/198	218/18800	0.000520362	0.00273602	0.00156037	FADD/RIPK3/TNF/NOD2/MAPK1/AKT1/MAPK3/DNM1L/IL1A	9	-0.333333
BP	GO:0010634	positive regulation of epithelial cell migration	8/198	174/18800	0.000524501	0.00274986	0.00156827	CD40/HDAC6/BMPR2/HSPB1/AKT1/TGFB1/MMP9/TGFBR2	8	0
BP	GO:0042129	regulation of T cell proliferation	8/198	174/18800	0.000524501	0.00274986	0.00156827	FADD/RIPK3/TRAF6/TNFRSF1B/CASP3/RIPK2/TGFBR2/IL1A	8	-0.707107
BP	GO:0014020	primary neural tube formation	6/198	96/18800	0.000534299	0.00279721	0.00159527	BCL10/TRAF6/CASP3/TGFB1/APAF1/OPA1	6	0
BP	GO:0010922	positive regulation of phosphatase activity	4/198	36/18800	0.000540018	0.00281906	0.00160773	RIPK3/BMP2/PPP1R15B/PPARGC1B	4	-1
BP	GO:0071312	cellular response to alkaloid	4/198	36/18800	0.000540018	0.00281906	0.00160773	CASP7/BCL2L1/CASP3/CASP6	4	-1
BP	GO:0035265	organ growth	8/198	175/18800	0.000544755	0.00283973	0.00161952	COMP/BCL2/TGFBR1/PTEN/AKT1/BMPR1A/TGFBR2/MMP13	8	0
BP	GO:0032642	regulation of chemokine production	6/198	97/18800	0.00056461	0.00293484	0.00167376	TICAM1/DDX3X/TNF/TLR3/NOD2/RIPK2	6	-1.63299
BP	GO:0043279	response to alkaloid	6/198	97/18800	0.00056461	0.00293484	0.00167376	CASP7/FADD/BCL2L1/CASP3/CASP6/UQCRC1	6	-0.816497
BP	GO:0032507	maintenance of protein location in cell	5/198	64/18800	0.000567568	0.00293767	0.00167538	PARK7/PINK1/AKT1/CAV1/GSN	5	0.447214
BP	GO:0045670	regulation of osteoclast differentiation	5/198	64/18800	0.000567568	0.00293767	0.00167538	ESRRA/TNF/TLR3/TRAF6/PPARGC1B	5	-1.34164
BP	GO:0060760	positive regulation of response to cytokine stimulus	5/198	64/18800	0.000567568	0.00293767	0.00167538	FADD/RIPK1/TRAF2/RIPK2/MMP12	5	1.34164
BP	GO:0002371	dendritic cell cytokine production	3/198	16/18800	0.000582372	0.00299307	0.00170697	TICAM1/TLR3/NOD2	3	-1.73205
BP	GO:0015867	ATP transport	3/198	16/18800	0.000582372	0.00299307	0.00170697	SLC25A6/SLC25A5/SLC25A4	3	0.57735
BP	GO:0050862	positive regulation of T cell receptor signaling pathway	3/198	16/18800	0.000582372	0.00299307	0.00170697	BCL10/RELA/IKBKG	3	-1.73205
BP	GO:0070431	nucleotide-binding oligomerization domain containing 2 signaling pathway	3/198	16/18800	0.000582372	0.00299307	0.00170697	RELA/NOD2/RIPK2	3	-0.57735
BP	GO:1900044	regulation of protein K63-linked ubiquitination	3/198	16/18800	0.000582372	0.00299307	0.00170697	DDX3X/UBE2N/NOD2	3	-1.73205
BP	GO:0001659	temperature homeostasis	8/198	177/18800	0.000587164	0.00301345	0.00171859	SQSTM1/TNF/PGAM5/MFN2/CAV1/FOXO1/IL1A/PPARGC1B	8	0
BP	GO:0032602	chemokine production	6/198	98/18800	0.000596239	0.00305144	0.00174026	TICAM1/DDX3X/TNF/TLR3/NOD2/RIPK2	6	-1.63299
BP	GO:0034620	cellular response to unfolded protein	6/198	98/18800	0.000596239	0.00305144	0.00174026	BAK1/VCP/STUB1/PPP1R15B/OPTN/BAX	6	-0.816497
BP	GO:0003203	endocardial cushion morphogenesis	4/198	37/18800	0.000600526	0.00306907	0.00175032	TGFBR1/BMP2/BMPR1A/TGFBR2	4	0
BP	GO:0014823	response to activity	5/198	65/18800	0.000609671	0.00310277	0.00176954	TNF/CAT/TOMM20/UQCRC1/MMP2	5	0.447214
BP	GO:0048645	animal organ formation	5/198	65/18800	0.000609671	0.00310277	0.00176954	BMP2/MAPK1/BMPR1A/MAPK3/TGFBR2	5	0.447214
BP	GO:0072577	endothelial cell apoptotic process	5/198	65/18800	0.000609671	0.00310277	0.00176954	MAP3K5/TNF/CD40/BMPR2/FOXO3	5	-1.34164
BP	GO:0018108	peptidyl-tyrosine phosphorylation	12/198	373/18800	0.000618367	0.00314265	0.00179228	TNF/TNFRSF1A/CD40/PRKCD/NOD2/TGFB1/RIPK2/MAPK3/CAV1/PPP2CA/MAP2K7/HAX1	12	0.57735
BP	GO:0001823	mesonephros development	6/198	99/18800	0.000629227	0.00319339	0.00182122	BCL2/CAT/BMP2/SMAD7/MAGED1/PKD2	6	-0.816497
BP	GO:0002833	positive regulation of response to biotic stimulus	8/198	180/18800	0.000655747	0.00331995	0.00189339	FADD/HSP90AA1/IKBKB/TRAF6/NOD2/MAP3K7/CASP6/MMP12	8	-0.707107
BP	GO:0022898	regulation of transmembrane transporter activity	10/198	273/18800	0.000655984	0.00331995	0.00189339	BCL2/SUMO1/PARK7/PINK1/PPIF/RIPK1/CAV1/PKD2/MMP9/NDUFA4	10	0.632456
BP	GO:0018212	peptidyl-tyrosine modification	12/198	376/18800	0.000663367	0.00334927	0.00191012	TNF/TNFRSF1A/CD40/PRKCD/NOD2/TGFB1/RIPK2/MAPK3/CAV1/PPP2CA/MAP2K7/HAX1	12	0.57735
BP	GO:0042100	B cell proliferation	6/198	100/18800	0.000663613	0.00334927	0.00191012	BCL2/TICAM1/CD40/PRKCD/CASP3/BAX	6	-1.63299
BP	GO:1904037	positive regulation of epithelial cell apoptotic process	4/198	38/18800	0.000665691	0.00335512	0.00191345	CD40/BAD/FOXO3/GSN	4	0
BP	GO:1901550	regulation of endothelial cell development	3/198	17/18800	0.000701699	0.00352201	0.00200863	TNF/TNFRSF1A/IKBKB	3	-1.73205
BP	GO:1903140	regulation of establishment of endothelial barrier	3/198	17/18800	0.000701699	0.00352201	0.00200863	TNF/TNFRSF1A/IKBKB	3	-1.73205
BP	GO:1904355	positive regulation of telomere capping	3/198	17/18800	0.000701699	0.00352201	0.00200863	MAPK1/MAPK3/MAP2K7	3	0.57735
BP	GO:0008584	male gonad development	7/198	140/18800	0.000713578	0.00357671	0.00203983	BCL2/TGFBR1/BCL2L1/UBB/TLR3/IL1A/BAX	7	-1.13389
BP	GO:0071470	cellular response to osmotic stress	4/198	39/18800	0.000735711	0.00368259	0.00210021	DDX3X/BAD/CASP3/PKD2	4	-1
BP	GO:0046546	development of primary male sexual characteristics	7/198	141/18800	0.000744278	0.00372037	0.00212176	BCL2/TGFBR1/BCL2L1/UBB/TLR3/IL1A/BAX	7	-1.13389
BP	GO:0071456	cellular response to hypoxia	7/198	143/18800	0.00080881	0.00403741	0.00230257	BCL2/STUB1/BAD/CFLAR/PTEN/PINK1/FOXO3	7	-1.88982
BP	GO:0001841	neural tube formation	6/198	104/18800	0.000815948	0.00406748	0.00231971	BCL10/TRAF6/CASP3/TGFB1/APAF1/OPA1	6	0
BP	GO:0006977	DNA damage response, signal transduction by p53 class mediator resulting in cell cycle arrest	3/198	18/18800	0.000835532	0.00413685	0.00235928	PIDD1/CRADD/CASP2	3	1.73205
BP	GO:0010940	positive regulation of necrotic cell death	3/198	18/18800	0.000835532	0.00413685	0.00235928	RIPK3/RIPK1/CASP6	3	0.57735
BP	GO:0034138	toll-like receptor 3 signaling pathway	3/198	18/18800	0.000835532	0.00413685	0.00235928	TNF/TLR3/CAV1	3	-0.57735
BP	GO:0048535	lymph node development	3/198	18/18800	0.000835532	0.00413685	0.00235928	FADD/RIPK3/TGFB1	3	-0.57735
BP	GO:0060438	trachea development	3/198	18/18800	0.000835532	0.00413685	0.00235928	MAPK1/MAPK3/TGFBR2	3	0.57735
BP	GO:0014065	phosphatidylinositol 3-kinase signaling	7/198	144/18800	0.000842693	0.00416665	0.00237627	TNF/CAT/PTEN/AKT1/BECN1/HAX1/FN1	7	0.377964
BP	GO:0045786	negative regulation of cell cycle	12/198	387/18800	0.000852597	0.00420992	0.00240095	BCL2/TNF/BMP2/FBXO7/HTRA2/PTEN/CASP3/TGFB1/PIDD1/CRADD/PKD2/CASP2	12	-0.57735
BP	GO:0042698	ovulation cycle	5/198	70/18800	0.000856257	0.00422227	0.002408	CASP3/ADAMTS1/FOXO3/CASP2/MMP2	5	1.34164
BP	GO:0031099	regeneration	8/198	188/18800	0.000870706	0.00428773	0.00244532	BAK1/BCL2/GFER/TNF/CFLAR/PTEN/TGFBR2/MMP2	8	-1.41421
BP	GO:0002714	positive regulation of B cell mediated immunity	4/198	41/18800	0.000891099	0.00437045	0.0024925	TNF/CD40/NOD2/TGFB1	4	-1
BP	GO:0002891	positive regulation of immunoglobulin mediated immune response	4/198	41/18800	0.000891099	0.00437045	0.0024925	TNF/CD40/NOD2/TGFB1	4	-1
BP	GO:1902742	apoptotic process involved in development	4/198	41/18800	0.000891099	0.00437045	0.0024925	BAK1/TNFRSF1A/TNFRSF1B/BAX	4	-1
BP	GO:0003279	cardiac septum development	6/198	106/18800	0.000901572	0.00440997	0.00251504	TGFBR1/BMPR2/SMAD7/TAB1/BMPR1A/TGFBR2	6	-0.816497
BP	GO:0062207	regulation of pattern recognition receptor signaling pathway	6/198	106/18800	0.000901572	0.00440997	0.00251504	DDX3X/TLR3/XIAP/NOD2/CAV1/BIRC3	6	-0.816497
BP	GO:0060411	cardiac septum morphogenesis	5/198	71/18800	0.000913354	0.00446162	0.0025445	TGFBR1/BMPR2/SMAD7/BMPR1A/TGFBR2	5	-0.447214
BP	GO:0045621	positive regulation of lymphocyte differentiation	6/198	107/18800	0.000946897	0.00461929	0.00263441	AMBRA1/BAD/RIPK2/FOXO3/MALT1/TGFBR2	6	0.816497
BP	GO:0001890	placenta development	7/198	147/18800	0.000951111	0.00463365	0.00264261	CASP8/BIRC6/BMPR2/MAPK1/AKT1/PKD2/HTRA1	7	-0.377964
BP	GO:0050821	protein stabilization	8/198	191/18800	0.000964579	0.004693	0.00267645	HSP90AA1/PRKCD/SUMO1/PARK7/SMAD7/PTEN/PINK1/USP2	8	-2.12132
BP	GO:0003208	cardiac ventricle morphogenesis	5/198	72/18800	0.000973236	0.00472253	0.00269329	TGFBR1/SMAD7/TGFB1/BMPR1A/TGFBR2	5	0.447214
BP	GO:0014855	striated muscle cell proliferation	5/198	72/18800	0.000973236	0.00472253	0.00269329	TGFBR1/CFLAR/PTEN/BMPR1A/TGFBR2	5	-0.447214
BP	GO:0030501	positive regulation of bone mineralization	4/198	42/18800	0.000976861	0.00473382	0.00269973	BMP2/BMPR2/TGFB1/BMPR1A	4	0
BP	GO:0003012	muscle system process	13/198	449/18800	0.000981764	0.00475127	0.00270969	COMP/TNF/TNFRSF1A/SUMO1/CFLAR/SMAD7/TNFRSF1B/BECN1/CAV1/CTTN/FOXO3/GSN/FOXO1	13	-0.27735
BP	GO:0003417	growth plate cartilage development	3/198	19/18800	0.000984531	0.00475206	0.00271013	COMP/TGFBR2/MMP13	3	0.57735
BP	GO:0035795	negative regulation of mitochondrial membrane permeability	3/198	19/18800	0.000984531	0.00475206	0.00271013	SLC25A6/SLC25A5/SLC25A4	3	0.57735
BP	GO:0003281	ventricular septum development	5/198	73/18800	0.00103599	0.00498723	0.00284425	TGFBR1/BMPR2/SMAD7/BMPR1A/TGFBR2	5	-0.447214
BP	GO:0060415	muscle tissue morphogenesis	5/198	73/18800	0.00103599	0.00498723	0.00284425	TGFBR1/BMP2/SMAD7/TGFB1/BMPR1A	5	-0.447214
BP	GO:0010632	regulation of epithelial cell migration	10/198	290/18800	0.00103973	0.0049921	0.00284703	TNF/CD40/HDAC6/BMPR2/HSPB1/PTEN/AKT1/TGFB1/MMP9/TGFBR2	10	-0.632456
BP	GO:0062012	regulation of small molecule metabolic process	11/198	342/18800	0.00103974	0.0049921	0.00284703	TNF/VCP/BMP2/BAD/PARK7/SIRT5/PINK1/AKT1/CAV1/COX11/FOXO1	11	-0.904534
BP	GO:0071897	DNA biosynthetic process	8/198	194/18800	0.00106639	0.00511337	0.00291619	GFER/TNF/HSP90AA1/VCP/BMPR2/MAPK1/MAPK3/MAP2K7	8	-1.41421
BP	GO:0002637	regulation of immunoglobulin production	5/198	74/18800	0.00110169	0.00527569	0.00300877	TNF/CD40/TRAF6/TGFB1/TRAF2	5	-0.447214
BP	GO:0045580	regulation of T cell differentiation	7/198	151/18800	0.00111244	0.00532017	0.00303413	AMBRA1/BAD/SMAD7/RIPK2/FOXO3/MALT1/TGFBR2	7	0.377964
BP	GO:0014066	regulation of phosphatidylinositol 3-kinase signaling	6/198	111/18800	0.00114597	0.00544663	0.00310626	TNF/CAT/PTEN/BECN1/HAX1/FN1	6	0
BP	GO:0010288	response to lead ion	3/198	20/18800	0.00114933	0.00544663	0.00310626	CAT/BECN1/PPP2CA	3	0.57735
BP	GO:0010310	regulation of hydrogen peroxide metabolic process	3/198	20/18800	0.00114933	0.00544663	0.00310626	MMP3/HDAC6/PINK1	3	-1.73205
BP	GO:0030150	protein import into mitochondrial matrix	3/198	20/18800	0.00114933	0.00544663	0.00310626	TOMM20/TOMM40/TOMM7	3	1.73205
BP	GO:1901679	nucleotide transmembrane transport	3/198	20/18800	0.00114933	0.00544663	0.00310626	SLC25A6/SLC25A5/SLC25A4	3	0.57735
BP	GO:1902004	positive regulation of amyloid-beta formation	3/198	20/18800	0.00114933	0.00544663	0.00310626	TNF/RELA/CASP3	3	-1.73205
BP	GO:1902236	negative regulation of endoplasmic reticulum stress-induced intrinsic apoptotic signaling pathway	3/198	20/18800	0.00114933	0.00544663	0.00310626	BCL2L1/PARK7/OPA1	3	-0.57735
BP	GO:0034504	protein localization to nucleus	10/198	294/18800	0.00115262	0.00545514	0.00311111	SQSTM1/PRKCD/SUMO1/PARK7/OTUD7B/AKT1/TARDBP/TGFB1/MAGED1/MMP12	10	0
BP	GO:0010799	regulation of peptidyl-threonine phosphorylation	4/198	44/18800	0.00116551	0.00549475	0.0031337	SMAD7/MAPK1/TGFB1/RIPK2	4	0
BP	GO:0050856	regulation of T cell receptor signaling pathway	4/198	44/18800	0.00116551	0.00549475	0.0031337	BCL10/RELA/IKBKG/MALT1	4	-1
BP	GO:1903573	negative regulation of response to endoplasmic reticulum stress	4/198	44/18800	0.00116551	0.00549475	0.0031337	BCL2L1/PARK7/PPP1R15B/OPA1	4	-1
BP	GO:0021536	diencephalon development	5/198	75/18800	0.00117044	0.00551086	0.00314289	BMP2/UBB/BMPR1A/BAX/UQCRQ	5	0.447214
BP	GO:0031668	cellular response to extracellular stimulus	9/198	245/18800	0.00119027	0.00559705	0.00319204	BCL2/MAP3K5/FAS/BMPR2/MAPK1/BECN1/MAPK3/FOXO3/FOXO1	9	-0.333333
BP	GO:0045834	positive regulation of lipid metabolic process	7/198	153/18800	0.00120077	0.00563915	0.00321605	TNF/AMBRA1/PRKCD/NOD2/AKT1/TGFB1/IL1A	7	-0.377964
BP	GO:0030968	endoplasmic reticulum unfolded protein response	5/198	76/18800	0.0012423	0.00581832	0.00331823	BAK1/VCP/STUB1/PPP1R15B/BAX	5	-1.34164
BP	GO:0034121	regulation of toll-like receptor signaling pathway	5/198	76/18800	0.0012423	0.00581832	0.00331823	DDX3X/TLR3/NOD2/CAV1/BIRC3	5	-0.447214
BP	GO:0010720	positive regulation of cell development	10/198	297/18800	0.00124371	0.00581832	0.00331823	BCL2/TNF/BMP2/BAD/BMPR2/SMAD7/TNFRSF1B/TGFB1/NGF/FN1	10	-1.26491
BP	GO:0021915	neural tube development	7/198	154/18800	0.00124695	0.00582603	0.00332263	BCL10/TRAF6/CASP3/TGFB1/APAF1/PKD2/OPA1	7	0.377964
BP	GO:1903828	negative regulation of protein localization	8/198	199/18800	0.00125504	0.00585631	0.0033399	BCL2L1/UBE2G2/SUMO1/PARK7/OTUD7B/TGFB1/MAGED1/COMMD1	8	-0.707107
BP	GO:0009636	response to toxic substance	9/198	247/18800	0.00125943	0.00586931	0.00334731	BAK1/BCL2/GFER/TNF/CAT/HTRA2/PARK7/PINK1/BAX	9	-2.33333
BP	GO:1904062	regulation of cation transmembrane transport	11/198	352/18800	0.00131002	0.00609729	0.00347733	SUMO1/PARK7/PINK1/PPIF/CAV1/PKD2/COMMD1/MMP9/VDAC1/BAX/NDUFA4	11	1.50756
BP	GO:0043200	response to amino acid	6/198	114/18800	0.00131521	0.00611363	0.00348665	TNF/BCL2L1/BAD/CASP3/TOMM20/MMP2	6	-0.816497
BP	GO:0002902	regulation of B cell apoptotic process	3/198	21/18800	0.00133054	0.00616134	0.00351386	BCL10/PTEN/BAX	3	-0.57735
BP	GO:0003177	pulmonary valve development	3/198	21/18800	0.00133054	0.00616134	0.00351386	TNFRSF1A/BMPR2/TNFRSF1B	3	-1.73205
BP	GO:0071243	cellular response to arsenic-containing substance	3/198	21/18800	0.00133054	0.00616134	0.00351386	DDX3X/VCP/PPIF	3	-0.57735
BP	GO:0032271	regulation of protein polymerization	8/198	201/18800	0.00133756	0.00618598	0.00352791	HSP90AA1/AMBRA1/PRKCD/PINK1/VDAC2/CTTN/GSN/HAX1	8	0
BP	GO:0090257	regulation of muscle system process	9/198	250/18800	0.00136922	0.00632442	0.00360686	TNFRSF1A/SUMO1/SMAD7/TNFRSF1B/BECN1/CAV1/CTTN/FOXO3/FOXO1	9	0.333333
BP	GO:0090288	negative regulation of cellular response to growth factor stimulus	6/198	115/18800	0.00137566	0.00634613	0.00361925	UBE2D1/UBE2D3/CFLAR/SMAD7/HTRA1/HTRA3	6	-0.816497
BP	GO:0001974	blood vessel remodeling	4/198	46/18800	0.0013783	0.00635027	0.00362161	BAK1/BMPR2/TGFB1/BAX	4	0
BP	GO:0010970	transport along microtubule	7/198	157/18800	0.00139389	0.00640592	0.00365334	UBB/RHOT2/HDAC6/HSPB1/LRPPRC/RHOT1/OPA1	7	-0.377964
BP	GO:0030856	regulation of epithelial cell differentiation	7/198	157/18800	0.00139389	0.00640592	0.00365334	TNF/TNFRSF1A/IKBKB/BAD/CAV1/MMP9/IL1A	7	-0.377964
BP	GO:0071383	cellular response to steroid hormone stimulus	8/198	203/18800	0.00142434	0.00653761	0.00372845	CASP9/ESRRA/PARK7/HDAC6/CFLAR/UBE2L3/FOXO3/PPARGC1B	8	-1.41421
BP	GO:0071675	regulation of mononuclear cell migration	6/198	116/18800	0.00143821	0.00659301	0.00376005	FADD/RIPK3/TNF/MAPK1/AKT1/MAPK3	6	-0.816497
BP	GO:0014068	positive regulation of phosphatidylinositol 3-kinase signaling	5/198	79/18800	0.00147752	0.0067647	0.00385796	TNF/CAT/BECN1/HAX1/FN1	5	0.447214
BP	GO:0032924	activin receptor signaling pathway	4/198	47/18800	0.00149424	0.00680411	0.00388044	TGFBR1/BMPR2/SMAD7/TGFBR2	4	-1
BP	GO:0051972	regulation of telomerase activity	4/198	47/18800	0.00149424	0.00680411	0.00388044	HSP90AA1/MAPK1/MAPK3/MAP2K7	4	0
BP	GO:0055010	ventricular cardiac muscle tissue morphogenesis	4/198	47/18800	0.00149424	0.00680411	0.00388044	TGFBR1/SMAD7/TGFB1/BMPR1A	4	0
BP	GO:0060711	labyrinthine layer development	4/198	47/18800	0.00149424	0.00680411	0.00388044	CASP8/BIRC6/MAPK1/AKT1	4	-1
BP	GO:0010631	epithelial cell migration	11/198	358/18800	0.00149824	0.00680411	0.00388044	TNF/TGFBR1/CD40/HDAC6/BMPR2/HSPB1/PTEN/AKT1/TGFB1/MMP9/TGFBR2	11	-0.904534
BP	GO:0006606	protein import into nucleus	7/198	159/18800	0.00149913	0.00680411	0.00388044	SQSTM1/PRKCD/SUMO1/AKT1/TARDBP/TGFB1/MMP12	7	0.377964
BP	GO:0032411	positive regulation of transporter activity	6/198	117/18800	0.00150291	0.00680411	0.00388044	PRKCD/SUMO1/PARK7/PINK1/PKD2/NDUFA4	6	-0.816497
BP	GO:0032609	interferon-gamma production	6/198	117/18800	0.00150291	0.00680411	0.00388044	FADD/RIPK3/TNF/TLR3/NOD2/RIPK2	6	-1.63299
BP	GO:0032649	regulation of interferon-gamma production	6/198	117/18800	0.00150291	0.00680411	0.00388044	FADD/RIPK3/TNF/TLR3/NOD2/RIPK2	6	-1.63299
BP	GO:0007162	negative regulation of cell adhesion	10/198	305/18800	0.00151568	0.00685342	0.00390856	BMP2/PRKCD/ARHGDIA/SMAD7/PTEN/CASP3/AKT1/TGFB1/MMP2/MMP12	10	-0.632456
BP	GO:0002223	stimulatory C-type lectin receptor signaling pathway	3/198	22/18800	0.00152874	0.00686993	0.00391797	IKBKB/TRAF6/MAP3K7	3	-0.57735
BP	GO:0032891	negative regulation of organic acid transport	3/198	22/18800	0.00152874	0.00686993	0.00391797	TNF/AKT1/FIS1	3	0.57735
BP	GO:0051000	positive regulation of nitric-oxide synthase activity	3/198	22/18800	0.00152874	0.00686993	0.00391797	TNF/AKT1/NOD1	3	0.57735
BP	GO:1903798	regulation of production of miRNAs involved in gene silencing by miRNA	3/198	22/18800	0.00152874	0.00686993	0.00391797	TNF/RIPK1/TGFB1	3	0.57735
BP	GO:1905709	negative regulation of membrane permeability	3/198	22/18800	0.00152874	0.00686993	0.00391797	SLC25A6/SLC25A5/SLC25A4	3	0.57735
BP	GO:0001558	regulation of cell growth	12/198	415/18800	0.00154617	0.0069397	0.00395776	BCL2/DDX3X/TGFBR1/BMPR2/SMAD7/AKT1/TGFB1/NGF/CTTN/PPP2CA/FN1/TNC	12	0.57735
BP	GO:0048644	muscle organ morphogenesis	5/198	80/18800	0.00156275	0.00700551	0.0039953	TGFBR1/BMP2/SMAD7/TGFB1/BMPR1A	5	-0.447214
BP	GO:0090132	epithelium migration	11/198	361/18800	0.00160036	0.00716529	0.00408642	TNF/TGFBR1/CD40/HDAC6/BMPR2/HSPB1/PTEN/AKT1/TGFB1/MMP9/TGFBR2	11	-0.904534
BP	GO:0031641	regulation of myelination	4/198	48/18800	0.0016168	0.00722119	0.0041183	TNF/PTEN/TNFRSF1B/AKT1	4	-1
BP	GO:0060324	face development	4/198	48/18800	0.0016168	0.00722119	0.0041183	MAPK1/RAF1/MAPK3/MMP2	4	1
BP	GO:0030500	regulation of bone mineralization	5/198	81/18800	0.00165155	0.00736736	0.00420166	COMP/BMP2/BMPR2/TGFB1/BMPR1A	5	-0.447214
BP	GO:0034765	regulation of ion transmembrane transport	13/198	476/18800	0.001656	0.00737818	0.00420783	TNF/SUMO1/PARK7/PINK1/PPIF/RIPK1/CAV1/PKD2/COMMD1/MMP9/VDAC1/BAX/NDUFA4	13	1.38675
BP	GO:0001837	epithelial to mesenchymal transition	7/198	162/18800	0.00166849	0.0074248	0.00423442	TGFBR1/BMP2/SMAD7/PTEN/TGFB1/PPP2CA/TGFBR2	7	-0.377964
BP	GO:0090100	positive regulation of transmembrane receptor protein serine/threonine kinase signaling pathway	6/198	120/18800	0.00171035	0.00760181	0.00433537	TGFBR1/BMP2/BMPR2/TGFB1/BMPR1A/TGFBR2	6	0
BP	GO:0051170	import into nucleus	7/198	163/18800	0.00172814	0.00764926	0.00436243	SQSTM1/PRKCD/SUMO1/AKT1/TARDBP/TGFB1/MMP12	7	0.377964
BP	GO:0009205	purine ribonucleoside triphosphate metabolic process	5/198	82/18800	0.00174399	0.00764926	0.00436243	VCP/PINK1/TGFB1/MFN1/OPA1	5	0.447214
BP	GO:0010155	regulation of proton transport	3/198	23/18800	0.0017445	0.00764926	0.00436243	PARK7/PPIF/NDUFA4	3	0.57735
BP	GO:0021854	hypothalamus development	3/198	23/18800	0.0017445	0.00764926	0.00436243	UBB/BAX/UQCRQ	3	0.57735
BP	GO:0030728	ovulation	3/198	23/18800	0.0017445	0.00764926	0.00436243	ADAMTS1/FOXO3/MMP2	3	1.73205
BP	GO:0035988	chondrocyte proliferation	3/198	23/18800	0.0017445	0.00764926	0.00436243	COMP/BMPR2/SMAD7	3	-1.73205
BP	GO:0051131	chaperone-mediated protein complex assembly	3/198	23/18800	0.0017445	0.00764926	0.00436243	HSP90AA1/STUB1/HSPA4	3	-0.57735
BP	GO:0070920	regulation of production of small RNA involved in gene silencing by RNA	3/198	23/18800	0.0017445	0.00764926	0.00436243	TNF/RIPK1/TGFB1	3	0.57735
BP	GO:1990840	response to lectin	3/198	23/18800	0.0017445	0.00764926	0.00436243	IKBKB/TRAF6/MAP3K7	3	-0.57735
BP	GO:1990858	cellular response to lectin	3/198	23/18800	0.0017445	0.00764926	0.00436243	IKBKB/TRAF6/MAP3K7	3	-0.57735
BP	GO:0010659	cardiac muscle cell apoptotic process	4/198	49/18800	0.00174619	0.00764926	0.00436243	MAP3K5/CFLAR/SIRT5/APAF1	4	-1
BP	GO:0060043	regulation of cardiac muscle cell proliferation	4/198	49/18800	0.00174619	0.00764926	0.00436243	TGFBR1/PTEN/BMPR1A/TGFBR2	4	0
BP	GO:0090130	tissue migration	11/198	366/18800	0.00178318	0.00778737	0.0044412	TNF/TGFBR1/CD40/HDAC6/BMPR2/HSPB1/PTEN/AKT1/TGFB1/MMP9/TGFBR2	11	-0.904534
BP	GO:0030282	bone mineralization	6/198	121/18800	0.00178412	0.00778737	0.0044412	COMP/BMP2/BMPR2/TGFB1/BMPR1A/MMP13	6	0
BP	GO:0051101	regulation of DNA binding	6/198	121/18800	0.00178412	0.00778737	0.0044412	TRAF6/SUMO1/PARK7/TGFB1/NGF/MMP9	6	0
BP	GO:0042509	regulation of tyrosine phosphorylation of STAT protein	5/198	83/18800	0.00184018	0.00802246	0.00457527	TNF/TNFRSF1A/CD40/CAV1/PPP2CA	5	-0.447214
BP	GO:0060425	lung morphogenesis	4/198	50/18800	0.00188258	0.00819754	0.00467512	TNF/MAPK1/MAPK3/TGFBR2	4	0
BP	GO:0002683	negative regulation of immune system process	12/198	425/18800	0.00188594	0.00820238	0.00467788	FADD/GFER/TNF/TLR3/FBXO7/SMAD7/CASP3/NOD2/AKT1/TGFB1/SYT11/MMP12	12	-1.1547
BP	GO:1900182	positive regulation of protein localization to nucleus	5/198	84/18800	0.00194019	0.00842826	0.0048067	PRKCD/PARK7/AKT1/TARDBP/TGFB1	5	0.447214
BP	GO:0035458	cellular response to interferon-beta	3/198	24/18800	0.00197836	0.00852305	0.00486076	TLR3/HTRA2/UBE2G2	3	-1.73205
BP	GO:0035994	response to muscle stretch	3/198	24/18800	0.00197836	0.00852305	0.00486076	RELA/RAF1/GSN	3	0.57735
BP	GO:0045672	positive regulation of osteoclast differentiation	3/198	24/18800	0.00197836	0.00852305	0.00486076	TNF/TRAF6/PPARGC1B	3	-0.57735
BP	GO:0072530	purine-containing compound transmembrane transport	3/198	24/18800	0.00197836	0.00852305	0.00486076	SLC25A6/SLC25A5/SLC25A4	3	0.57735
BP	GO:1901028	regulation of mitochondrial outer membrane permeabilization involved in apoptotic signaling pathway	3/198	24/18800	0.00197836	0.00852305	0.00486076	SLC25A6/SLC25A5/SLC25A4	3	0.57735
BP	GO:1904996	positive regulation of leukocyte adhesion to vascular endothelial cell	3/198	24/18800	0.00197836	0.00852305	0.00486076	TNF/TRAF6/RELA	3	-1.73205
BP	GO:2000679	positive regulation of transcription regulatory region DNA binding	3/198	24/18800	0.00197836	0.00852305	0.00486076	TRAF6/PARK7/TGFB1	3	-0.57735
BP	GO:0034250	positive regulation of cellular amide metabolic process	7/198	167/18800	0.00198347	0.00853501	0.00486758	DDX3X/TNF/RELA/PRKCD/CASP3/NOD2/PINK1	7	-2.64575
BP	GO:0001838	embryonic epithelial tube formation	6/198	124/18800	0.00201993	0.00867785	0.00494904	BCL10/TRAF6/CASP3/TGFB1/APAF1/OPA1	6	0
BP	GO:0010658	striated muscle cell apoptotic process	4/198	51/18800	0.00202618	0.00867785	0.00494904	MAP3K5/CFLAR/SIRT5/APAF1	4	-1
BP	GO:0045778	positive regulation of ossification	4/198	51/18800	0.00202618	0.00867785	0.00494904	BMP2/BMPR2/TGFB1/BMPR1A	4	0
BP	GO:0071622	regulation of granulocyte chemotaxis	4/198	51/18800	0.00202618	0.00867785	0.00494904	NOD2/MAPK1/MAPK3/DNM1L	4	0
BP	GO:0032102	negative regulation of response to external stimulus	12/198	429/18800	0.002038	0.00871825	0.00497208	GFER/TNF/TNFRSF1A/PRKCD/PTEN/TNFRSF1B/NOD2/CARD8/SYT11/HTRA1/SHARPIN/MMP12	12	-0.57735
BP	GO:0010657	muscle cell apoptotic process	5/198	85/18800	0.00204411	0.00873416	0.00498116	MAP3K5/MFN2/CFLAR/SIRT5/APAF1	5	-1.34164
BP	GO:0035196	production of miRNAs involved in gene silencing by miRNA	4/198	52/18800	0.00217717	0.00928097	0.00529301	DDX3X/TNF/RIPK1/TGFB1	4	0
BP	GO:0070169	positive regulation of biomineral tissue development	4/198	52/18800	0.00217717	0.00928097	0.00529301	BMP2/BMPR2/TGFB1/BMPR1A	4	0
BP	GO:0003231	cardiac ventricle development	6/198	126/18800	0.00218975	0.00932368	0.00531736	TGFBR1/BMPR2/SMAD7/TGFB1/BMPR1A/TGFBR2	6	0
BP	GO:0031348	negative regulation of defense response	9/198	268/18800	0.00220086	0.00936006	0.00533811	GFER/TNFRSF1A/PRKCD/TNFRSF1B/NOD2/SYT11/HTRA1/SHARPIN/MMP12	9	-0.333333
BP	GO:0010001	glial cell differentiation	8/198	218/18800	0.00222713	0.00944347	0.00538568	TNF/BMP2/PTEN/TNFRSF1B/MAPK1/AKT1/TGFB1/MAPK3	8	-0.707107
BP	GO:0003148	outflow tract septum morphogenesis	3/198	25/18800	0.00223082	0.00944347	0.00538568	BMPR2/BMPR1A/TGFBR2	3	0.57735
BP	GO:0060343	trabecula formation	3/198	25/18800	0.00223082	0.00944347	0.00538568	ADAMTS1/PPARGC1B/MMP2	3	1.73205
BP	GO:1902993	positive regulation of amyloid precursor protein catabolic process	3/198	25/18800	0.00223082	0.00944347	0.00538568	TNF/RELA/CASP3	3	-1.73205
BP	GO:0001892	embryonic placenta development	5/198	87/18800	0.00226409	0.00955104	0.00544703	CASP8/BIRC6/MAPK1/AKT1/PKD2	5	-0.447214
BP	GO:0007260	tyrosine phosphorylation of STAT protein	5/198	87/18800	0.00226409	0.00955104	0.00544703	TNF/TNFRSF1A/CD40/CAV1/PPP2CA	5	-0.447214
BP	GO:0009144	purine nucleoside triphosphate metabolic process	5/198	87/18800	0.00226409	0.00955104	0.00544703	VCP/PINK1/TGFB1/MFN1/OPA1	5	0.447214
BP	GO:0010718	positive regulation of epithelial to mesenchymal transition	4/198	53/18800	0.00233576	0.00979676	0.00558716	TGFBR1/BMP2/TGFB1/TGFBR2	4	0
BP	GO:0071385	cellular response to glucocorticoid stimulus	4/198	53/18800	0.00233576	0.00979676	0.00558716	CASP9/CFLAR/UBE2L3/FOXO3	4	-1
BP	GO:0072132	mesenchyme morphogenesis	4/198	53/18800	0.00233576	0.00979676	0.00558716	TGFBR1/BMP2/BMPR1A/TGFBR2	4	0
BP	GO:0110151	positive regulation of biomineralization	4/198	53/18800	0.00233576	0.00979676	0.00558716	BMP2/BMPR2/TGFB1/BMPR1A	4	0
BP	GO:1900087	positive regulation of G1/S transition of mitotic cell cycle	4/198	53/18800	0.00233576	0.00979676	0.00558716	DDX3X/AKT1/ADAMTS1/UBE2E2	4	1
BP	GO:1905475	regulation of protein localization to membrane	7/198	172/18800	0.00234268	0.00981451	0.00559729	SQSTM1/TNF/BCL2L1/AKT1/TGFB1/GSN/FIS1	7	0.377964
BP	GO:0014031	mesenchymal cell development	5/198	88/18800	0.00238031	0.00996071	0.00568067	BCL2/MAPK1/BMPR1A/MAPK3/FN1	5	0.447214
BP	GO:0043270	positive regulation of ion transport	9/198	273/18800	0.0024919	0.0103882	0.00592447	BAK1/SUMO1/PINK1/AKT1/CAV1/PKD2/IL1A/BAX/NDUFA4	9	1
BP	GO:0009199	ribonucleoside triphosphate metabolic process	5/198	89/18800	0.00250081	0.0103882	0.00592447	VCP/PINK1/TGFB1/MFN1/OPA1	5	0.447214
BP	GO:0010524	positive regulation of calcium ion transport into cytosol	4/198	54/18800	0.00250211	0.0103882	0.00592447	BAK1/CAV1/PKD2/BAX	4	1
BP	GO:0030878	thyroid gland development	3/198	26/18800	0.00250239	0.0103882	0.00592447	MAPK1/RAF1/MAPK3	3	0.57735
BP	GO:0050857	positive regulation of antigen receptor-mediated signaling pathway	3/198	26/18800	0.00250239	0.0103882	0.00592447	BCL10/RELA/IKBKG	3	-1.73205
BP	GO:1904353	regulation of telomere capping	3/198	26/18800	0.00250239	0.0103882	0.00592447	MAPK1/MAPK3/MAP2K7	3	0.57735
BP	GO:1904385	cellular response to angiotensin	3/198	26/18800	0.00250239	0.0103882	0.00592447	RELA/PRKCD/CAV1	3	-0.57735
BP	GO:0042475	odontogenesis of dentin-containing tooth	5/198	90/18800	0.00262568	0.0108876	0.00620929	BMP2/TRAF6/BMPR1A/HTRA1/BAX	5	0.447214
BP	GO:0051258	protein polymerization	9/198	277/18800	0.00274607	0.0113739	0.00648662	HSP90AA1/AMBRA1/PRKCD/PINK1/VDAC2/CTTN/GSN/HAX1/DNM1L	9	0.333333
BP	GO:0048015	phosphatidylinositol-mediated signaling	7/198	177/18800	0.00275011	0.0113777	0.00648881	TNF/CAT/PTEN/AKT1/BECN1/HAX1/FN1	7	0.377964
BP	GO:0090398	cellular senescence	5/198	91/18800	0.00275501	0.0113851	0.006493	MAP3K5/PRKCD/BMPR1A/MAP2K7/OPA1	5	0.447214
BP	GO:0009743	response to carbohydrate	8/198	226/18800	0.00278105	0.0114278	0.00651736	CAT/BAD/CASP3/RAF1/FOXO3/MAP2K7/TGFBR2/IL1A	8	0.707107
BP	GO:0002220	innate immune response activating cell surface receptor signaling pathway	3/198	27/18800	0.00279353	0.0114278	0.00651736	IKBKB/TRAF6/MAP3K7	3	-0.57735
BP	GO:0002719	negative regulation of cytokine production involved in immune response	3/198	27/18800	0.00279353	0.0114278	0.00651736	TNF/SMAD7/TGFB1	3	-0.57735
BP	GO:0016540	protein autoprocessing	3/198	27/18800	0.00279353	0.0114278	0.00651736	HTRA2/PIDD1/CASP6	3	0.57735
BP	GO:0030262	apoptotic nuclear changes	3/198	27/18800	0.00279353	0.0114278	0.00651736	APAF1/SHARPIN/BAX	3	1.73205
BP	GO:0033032	regulation of myeloid cell apoptotic process	3/198	27/18800	0.00279353	0.0114278	0.00651736	BCL2/PTEN/NOD2	3	-1.73205
BP	GO:0051503	adenine nucleotide transport	3/198	27/18800	0.00279353	0.0114278	0.00651736	SLC25A6/SLC25A5/SLC25A4	3	0.57735
BP	GO:1900017	positive regulation of cytokine production involved in inflammatory response	3/198	27/18800	0.00279353	0.0114278	0.00651736	TICAM1/TNF/NOD2	3	-1.73205
BP	GO:1903055	positive regulation of extracellular matrix organization	3/198	27/18800	0.00279353	0.0114278	0.00651736	BMP2/CFLAR/TGFB1	3	-0.57735
BP	GO:0048588	developmental cell growth	8/198	227/18800	0.00285724	0.011656	0.00664752	HSP90AA1/HDAC6/BMPR2/SMAD7/NGF/CTTN/TGFBR2/FN1	8	0
BP	GO:0003229	ventricular cardiac muscle tissue development	4/198	56/18800	0.0028589	0.011656	0.00664752	TGFBR1/SMAD7/TGFB1/BMPR1A	4	0
BP	GO:0070918	primary sncRNA processing	4/198	56/18800	0.0028589	0.011656	0.00664752	DDX3X/TNF/RIPK1/TGFB1	4	0
BP	GO:0001658	branching involved in ureteric bud morphogenesis	4/198	57/18800	0.00304971	0.0123786	0.00705962	BCL2/BMP2/MAGED1/PKD2	4	0
BP	GO:0042306	regulation of protein import into nucleus	4/198	57/18800	0.00304971	0.0123786	0.00705962	PRKCD/SUMO1/TARDBP/TGFB1	4	0
BP	GO:0060350	endochondral bone morphogenesis	4/198	57/18800	0.00304971	0.0123786	0.00705962	COMP/BMPR2/TGFBR2/MMP13	4	0
BP	GO:2001258	negative regulation of cation channel activity	4/198	57/18800	0.00304971	0.0123786	0.00705962	SUMO1/CAV1/PKD2/MMP9	4	1
BP	GO:0002758	innate immune response-activating signal transduction	3/198	28/18800	0.0031047	0.0125183	0.00713928	IKBKB/TRAF6/MAP3K7	3	-0.57735
BP	GO:0003416	endochondral bone growth	3/198	28/18800	0.0031047	0.0125183	0.00713928	COMP/TGFBR2/MMP13	3	0.57735
BP	GO:0010800	positive regulation of peptidyl-threonine phosphorylation	3/198	28/18800	0.0031047	0.0125183	0.00713928	MAPK1/TGFB1/RIPK2	3	0.57735
BP	GO:0015868	purine ribonucleotide transport	3/198	28/18800	0.0031047	0.0125183	0.00713928	SLC25A6/SLC25A5/SLC25A4	3	0.57735
BP	GO:0034123	positive regulation of toll-like receptor signaling pathway	3/198	28/18800	0.0031047	0.0125183	0.00713928	DDX3X/TLR3/CAV1	3	-0.57735
BP	GO:0070723	response to cholesterol	3/198	28/18800	0.0031047	0.0125183	0.00713928	TGFBR1/TGFB1/TGFBR2	3	0.57735
BP	GO:0048017	inositol lipid-mediated signaling	7/198	181/18800	0.00311354	0.0125401	0.00715171	TNF/CAT/PTEN/AKT1/BECN1/HAX1/FN1	7	0.377964
BP	GO:0033108	mitochondrial respiratory chain complex assembly	5/198	94/18800	0.00317066	0.0127561	0.00727488	SURF1/COX18/SCO1/COX19/UQCRFS1	5	2.23607
BP	GO:0072175	epithelial tube formation	6/198	136/18800	0.00320542	0.0128817	0.00734652	BCL10/TRAF6/CASP3/TGFB1/APAF1/OPA1	6	0
BP	GO:0033619	membrane protein proteolysis	4/198	58/18800	0.00324902	0.0130282	0.0074301	TNF/TNFRSF1B/TGFB1/PARL	4	0
BP	GO:0060038	cardiac muscle cell proliferation	4/198	58/18800	0.00324902	0.0130282	0.0074301	TGFBR1/PTEN/BMPR1A/TGFBR2	4	0
BP	GO:0019216	regulation of lipid metabolic process	10/198	339/18800	0.00326069	0.0130553	0.00744555	TNF/BMP2/STUB1/AMBRA1/PRKCD/NOD2/AKT1/TGFB1/CAV1/IL1A	10	-0.632456
BP	GO:0002274	myeloid leukocyte activation	8/198	232/18800	0.00326294	0.0130553	0.00744555	TICAM1/TNF/TLR3/TRAF6/PRKCD/SYT11/TGFBR2/FN1	8	-0.707107
BP	GO:1901991	negative regulation of mitotic cell cycle phase transition	7/198	183/18800	0.00330849	0.0132231	0.00754123	BCL2/FBXO7/PTEN/PIDD1/CRADD/PKD2/CASP2	7	0.377964
BP	GO:0043502	regulation of muscle adaptation	5/198	95/18800	0.00331874	0.0132496	0.00755632	TNFRSF1A/TNFRSF1B/BECN1/FOXO3/FOXO1	5	0.447214
BP	GO:0097696	receptor signaling pathway via STAT	7/198	184/18800	0.00340939	0.0135966	0.00775424	TNF/TNFRSF1A/CD40/TGFB1/CAV1/PPP2CA/PKD2	7	0.377964
BP	GO:0006921	cellular component disassembly involved in execution phase of apoptosis	3/198	29/18800	0.00343632	0.0136182	0.00776658	APAF1/SHARPIN/BAX	3	1.73205
BP	GO:0015865	purine nucleotide transport	3/198	29/18800	0.00343632	0.0136182	0.00776658	SLC25A6/SLC25A5/SLC25A4	3	0.57735
BP	GO:0031571	mitotic G1 DNA damage checkpoint signaling	3/198	29/18800	0.00343632	0.0136182	0.00776658	PIDD1/CRADD/CASP2	3	1.73205
BP	GO:0060037	pharyngeal system development	3/198	29/18800	0.00343632	0.0136182	0.00776658	TGFBR1/BMPR2/BMPR1A	3	-0.57735
BP	GO:0061082	myeloid leukocyte cytokine production	3/198	29/18800	0.00343632	0.0136182	0.00776658	BCL10/TICAM1/TGFB1	3	-0.57735
BP	GO:0045930	negative regulation of mitotic cell cycle	8/198	234/18800	0.00343721	0.0136182	0.00776658	BCL2/TNF/FBXO7/PTEN/PIDD1/CRADD/PKD2/CASP2	8	0
BP	GO:0071384	cellular response to corticosteroid stimulus	4/198	59/18800	0.00345704	0.0136819	0.0078029	CASP9/CFLAR/UBE2L3/FOXO3	4	-1
BP	GO:0030316	osteoclast differentiation	5/198	96/18800	0.00347173	0.0137252	0.00782758	ESRRA/TNF/TLR3/TRAF6/PPARGC1B	5	-1.34164
BP	GO:0050921	positive regulation of chemotaxis	6/198	140/18800	0.0036972	0.014585	0.00831791	BMPR2/HSPB1/MAPK1/TGFB1/MAPK3/DNM1L	6	0
BP	GO:0072073	kidney epithelium development	6/198	140/18800	0.0036972	0.014585	0.00831791	BCL2/CAT/BMP2/SMAD7/MAGED1/PKD2	6	-0.816497
BP	GO:0044819	mitotic G1/S transition checkpoint signaling	3/198	30/18800	0.00378881	0.0148498	0.00846895	PIDD1/CRADD/CASP2	3	1.73205
BP	GO:0070979	protein K11-linked ubiquitination	3/198	30/18800	0.00378881	0.0148498	0.00846895	UBE2D3/UBE2L3/UBE2E2	3	-0.57735
BP	GO:1900101	regulation of endoplasmic reticulum unfolded protein response	3/198	30/18800	0.00378881	0.0148498	0.00846895	BAK1/PPP1R15B/BAX	3	-0.57735
BP	GO:1902230	negative regulation of intrinsic apoptotic signaling pathway in response to DNA damage	3/198	30/18800	0.00378881	0.0148498	0.00846895	BCL2/BID/BCL2L1	3	-1.73205
BP	GO:1903579	negative regulation of ATP metabolic process	3/198	30/18800	0.00378881	0.0148498	0.00846895	TNF/PPIF/FIS1	3	0.57735
BP	GO:1990776	response to angiotensin	3/198	30/18800	0.00378881	0.0148498	0.00846895	RELA/PRKCD/CAV1	3	-0.57735
BP	GO:0000079	regulation of cyclin-dependent protein serine/threonine kinase activity	5/198	98/18800	0.00379282	0.0148498	0.00846895	FBXO7/PTEN/CASP3/AKT1/PKD2	5	-0.447214
BP	GO:0002687	positive regulation of leukocyte migration	6/198	141/18800	0.00382844	0.0149732	0.00853932	FADD/TNF/MAPK1/MAPK3/DNM1L/IL1A	6	0
BP	GO:0060537	muscle tissue development	11/198	405/18800	0.00387431	0.0151364	0.00863238	BCL2/TGFBR1/BMP2/CFLAR/SMAD7/PTEN/TGFB1/BMPR1A/CAV1/PKD2/TGFBR2	11	-0.301511
BP	GO:1904589	regulation of protein import	4/198	61/18800	0.00389986	0.0152199	0.00868003	PRKCD/SUMO1/TARDBP/TGFB1	4	0
BP	GO:0010212	response to ionizing radiation	6/198	142/18800	0.00396311	0.0154172	0.00879257	BAK1/BCL2/BCL2L1/CASP3/IL1A/BAX	6	-0.816497
BP	GO:0030183	B cell differentiation	6/198	142/18800	0.00396311	0.0154172	0.00879257	BAK1/BCL2/BAD/SLC25A5/MALT1/BAX	6	0
BP	GO:0045598	regulation of fat cell differentiation	6/198	142/18800	0.00396311	0.0154172	0.00879257	TNF/BMP2/HDAC6/AKT1/TGFB1/FOXO1	6	0
BP	GO:0050731	positive regulation of peptidyl-tyrosine phosphorylation	7/198	190/18800	0.00406497	0.0157967	0.00900897	TNF/TNFRSF1A/CD40/NOD2/TGFB1/RIPK2/HAX1	7	-0.377964
BP	GO:0001649	osteoblast differentiation	8/198	241/18800	0.00410471	0.0159341	0.00908736	ESRRA/TNF/CAT/BMP2/BMPR2/AKT1/BMPR1A/TNC	8	-0.707107
BP	GO:0002712	regulation of B cell mediated immunity	4/198	62/18800	0.00413503	0.0160008	0.00912536	TNF/CD40/NOD2/TGFB1	4	-1
BP	GO:0002889	regulation of immunoglobulin mediated immune response	4/198	62/18800	0.00413503	0.0160008	0.00912536	TNF/CD40/NOD2/TGFB1	4	-1
BP	GO:0030199	collagen fibril organization	4/198	62/18800	0.00413503	0.0160008	0.00912536	COMP/LUM/TGFBR1/FMOD	4	-1
BP	GO:0060351	cartilage development involved in endochondral bone morphogenesis	3/198	31/18800	0.00416255	0.0160223	0.00913765	COMP/TGFBR2/MMP13	3	0.57735
BP	GO:0061036	positive regulation of cartilage development	3/198	31/18800	0.00416255	0.0160223	0.00913765	BMP2/BMPR2/SMAD7	3	-1.73205
BP	GO:0061311	cell surface receptor signaling pathway involved in heart development	3/198	31/18800	0.00416255	0.0160223	0.00913765	BMP2/TGFB1/BMPR1A	3	0.57735
BP	GO:0061384	heart trabecula morphogenesis	3/198	31/18800	0.00416255	0.0160223	0.00913765	TGFBR1/ADAMTS1/BMPR1A	3	0.57735
BP	GO:0098868	bone growth	3/198	31/18800	0.00416255	0.0160223	0.00913765	COMP/TGFBR2/MMP13	3	0.57735
BP	GO:0030177	positive regulation of Wnt signaling pathway	6/198	144/18800	0.00424293	0.0163145	0.00930427	DDX3X/VCP/BMP2/XIAP/TGFB1/CAV1	6	-0.816497
BP	GO:0046620	regulation of organ growth	5/198	101/18800	0.00431357	0.0165338	0.00942937	TGFBR1/PTEN/AKT1/BMPR1A/TGFBR2	5	0.447214
BP	GO:0070167	regulation of biomineral tissue development	5/198	101/18800	0.00431357	0.0165338	0.00942937	COMP/BMP2/BMPR2/TGFB1/BMPR1A	5	-0.447214
BP	GO:1904029	regulation of cyclin-dependent protein kinase activity	5/198	101/18800	0.00431357	0.0165338	0.00942937	FBXO7/PTEN/CASP3/AKT1/PKD2	5	-0.447214
BP	GO:0009410	response to xenobiotic stimulus	11/198	411/18800	0.00432318	0.0165533	0.00944047	BAK1/BCL2/TNF/CAT/TLR3/BAD/CASP3/BECN1/FOXO3/TGFBR2/MMP2	11	-0.904534
BP	GO:0060675	ureteric bud morphogenesis	4/198	63/18800	0.0043796	0.0167145	0.00953241	BCL2/BMP2/MAGED1/PKD2	4	0
BP	GO:0070542	response to fatty acid	4/198	63/18800	0.0043796	0.0167145	0.00953241	CAT/BAD/FOXO3/FOXO1	4	0
BP	GO:0071806	protein transmembrane transport	4/198	63/18800	0.0043796	0.0167145	0.00953241	TOMM22/TOMM20/TOMM40/TOMM7	4	1
BP	GO:0043524	negative regulation of neuron apoptotic process	6/198	145/18800	0.00438819	0.0167145	0.00953241	BCL2/BCL2L1/PARK7/PINK1/NGF/BAX	6	-0.816497
BP	GO:0050729	positive regulation of inflammatory response	6/198	145/18800	0.00438819	0.0167145	0.00953241	TNF/TNFRSF1A/TLR3/PARK7/TRADD/RIPK1	6	-1.63299
BP	GO:0062013	positive regulation of small molecule metabolic process	6/198	146/18800	0.00453709	0.0172637	0.00984559	TNF/VCP/PARK7/PINK1/AKT1/FOXO1	6	-0.816497
BP	GO:0033028	myeloid cell apoptotic process	3/198	32/18800	0.00455792	0.0172709	0.00984971	BCL2/PTEN/NOD2	3	-1.73205
BP	GO:0060674	placenta blood vessel development	3/198	32/18800	0.00455792	0.0172709	0.00984971	MAPK1/AKT1/PKD2	3	0.57735
BP	GO:1901889	negative regulation of cell junction assembly	3/198	32/18800	0.00455792	0.0172709	0.00984971	TNF/IKBKB/PTEN	3	-1.73205
BP	GO:1902235	regulation of endoplasmic reticulum stress-induced intrinsic apoptotic signaling pathway	3/198	32/18800	0.00455792	0.0172709	0.00984971	BCL2L1/PARK7/OPA1	3	-0.57735
BP	GO:0014015	positive regulation of gliogenesis	4/198	64/18800	0.00463373	0.0173502	0.00989496	TNF/BMP2/TNFRSF1B/TGFB1	4	-1
BP	GO:0030888	regulation of B cell proliferation	4/198	64/18800	0.00463373	0.0173502	0.00989496	BCL2/TICAM1/CD40/CASP3	4	-2
BP	GO:0072171	mesonephric tubule morphogenesis	4/198	64/18800	0.00463373	0.0173502	0.00989496	BCL2/BMP2/MAGED1/PKD2	4	0
BP	GO:0010522	regulation of calcium ion transport into cytosol	5/198	103/18800	0.00468785	0.0173502	0.00989496	BAK1/BCL2/CAV1/PKD2/BAX	5	0.447214
BP	GO:0042102	positive regulation of T cell proliferation	5/198	103/18800	0.00468785	0.0173502	0.00989496	FADD/TRAF6/RIPK2/TGFBR2/IL1A	5	0.447214
BP	GO:0110149	regulation of biomineralization	5/198	103/18800	0.00468785	0.0173502	0.00989496	COMP/BMP2/BMPR2/TGFB1/BMPR1A	5	-0.447214
BP	GO:1903076	regulation of protein localization to plasma membrane	5/198	103/18800	0.00468785	0.0173502	0.00989496	SQSTM1/TNF/BCL2L1/AKT1/TGFB1	5	-0.447214
BP	GO:0003183	mitral valve morphogenesis	2/198	10/18800	0.00469773	0.0173502	0.00989496	BMPR2/BMPR1A	2	0
BP	GO:0016559	peroxisome fission	2/198	10/18800	0.00469773	0.0173502	0.00989496	FIS1/DNM1L	2	1.41421
BP	GO:0021548	pons development	2/198	10/18800	0.00469773	0.0173502	0.00989496	BCL2/UQCRQ	2	0
BP	GO:0031943	regulation of glucocorticoid metabolic process	2/198	10/18800	0.00469773	0.0173502	0.00989496	BMP2/STUB1	2	-1.41421
BP	GO:0032070	regulation of deoxyribonuclease activity	2/198	10/18800	0.00469773	0.0173502	0.00989496	PRKCD/AKT1	2	0
BP	GO:0033079	immature T cell proliferation	2/198	10/18800	0.00469773	0.0173502	0.00989496	RIPK2/IL1A	2	1.41421
BP	GO:0033131	regulation of glucokinase activity	2/198	10/18800	0.00469773	0.0173502	0.00989496	BAD/COX11	2	0
BP	GO:0033197	response to vitamin E	2/198	10/18800	0.00469773	0.0173502	0.00989496	CAT/BECN1	2	0
BP	GO:0048563	post-embryonic animal organ morphogenesis	2/198	10/18800	0.00469773	0.0173502	0.00989496	BAK1/BAX	2	0
BP	GO:0051351	positive regulation of ligase activity	2/198	10/18800	0.00469773	0.0173502	0.00989496	RIPK3/AIMP2	2	0
BP	GO:0060068	vagina development	2/198	10/18800	0.00469773	0.0173502	0.00989496	BAK1/BAX	2	0
BP	GO:0060346	bone trabecula formation	2/198	10/18800	0.00469773	0.0173502	0.00989496	PPARGC1B/MMP2	2	1.41421
BP	GO:0061626	pharyngeal arch artery morphogenesis	2/198	10/18800	0.00469773	0.0173502	0.00989496	BMPR2/BMPR1A	2	0
BP	GO:0070391	response to lipoteichoic acid	2/198	10/18800	0.00469773	0.0173502	0.00989496	RELA/RIPK2	2	0
BP	GO:0071223	cellular response to lipoteichoic acid	2/198	10/18800	0.00469773	0.0173502	0.00989496	RELA/RIPK2	2	0
BP	GO:0097049	motor neuron apoptotic process	2/198	10/18800	0.00469773	0.0173502	0.00989496	FADD/FAS	2	-1.41421
BP	GO:1902510	regulation of apoptotic DNA fragmentation	2/198	10/18800	0.00469773	0.0173502	0.00989496	APAF1/BAX	2	1.41421
BP	GO:2000347	positive regulation of hepatocyte proliferation	2/198	10/18800	0.00469773	0.0173502	0.00989496	TNF/CFLAR	2	-1.41421
BP	GO:0098656	anion transmembrane transport	8/198	247/18800	0.00475286	0.0175361	0.010001	SLC25A6/TNF/VDAC3/SLC25A5/RIPK1/VDAC2/VDAC1/SLC25A4	8	0.707107
BP	GO:0046822	regulation of nucleocytoplasmic transport	5/198	104/18800	0.00488341	0.0179995	0.0102653	PRKCD/SUMO1/PARK7/TARDBP/TGFB1	5	-0.447214
BP	GO:0031100	animal organ regeneration	4/198	65/18800	0.00489761	0.0180337	0.0102847	BAK1/GFER/TNF/TGFBR2	4	-1
BP	GO:0030705	cytoskeleton-dependent intracellular transport	7/198	197/18800	0.00494595	0.0181729	0.0103641	UBB/RHOT2/HDAC6/HSPB1/LRPPRC/RHOT1/OPA1	7	-0.377964
BP	GO:0036314	response to sterol	3/198	33/18800	0.00497526	0.0181729	0.0103641	TGFBR1/TGFB1/TGFBR2	3	0.57735
BP	GO:0043552	positive regulation of phosphatidylinositol 3-kinase activity	3/198	33/18800	0.00497526	0.0181729	0.0103641	AMBRA1/NOD2/TGFB1	3	-0.57735
BP	GO:0045736	negative regulation of cyclin-dependent protein serine/threonine kinase activity	3/198	33/18800	0.00497526	0.0181729	0.0103641	FBXO7/PTEN/CASP3	3	-1.73205
BP	GO:0046685	response to arsenic-containing substance	3/198	33/18800	0.00497526	0.0181729	0.0103641	DDX3X/VCP/PPIF	3	-0.57735
BP	GO:0060317	cardiac epithelial to mesenchymal transition	3/198	33/18800	0.00497526	0.0181729	0.0103641	TGFBR1/BMP2/TGFBR2	3	-0.57735
BP	GO:1904030	negative regulation of cyclin-dependent protein kinase activity	3/198	33/18800	0.00497526	0.0181729	0.0103641	FBXO7/PTEN/CASP3	3	-1.73205
BP	GO:2000191	regulation of fatty acid transport	3/198	33/18800	0.00497526	0.0181729	0.0103641	AKT1/FIS1/IL1A	3	1.73205
BP	GO:0001667	ameboidal-type cell migration	12/198	480/18800	0.00502193	0.018325	0.0104509	TNF/TGFBR1/CD40/HDAC6/BMPR2/HSPB1/PTEN/AKT1/TGFB1/MMP9/TGFBR2/FN1	12	-0.57735
BP	GO:0099111	microtubule-based transport	7/198	198/18800	0.00508267	0.0185282	0.0105667	UBB/RHOT2/HDAC6/HSPB1/LRPPRC/RHOT1/OPA1	7	-0.377964
BP	GO:0007584	response to nutrient	6/198	150/18800	0.00517017	0.0187392	0.0106871	CAT/NOD2/BECN1/APAF1/TGFBR2/IL1A	6	0.816497
BP	GO:0016331	morphogenesis of embryonic epithelium	6/198	150/18800	0.00517017	0.0187392	0.0106871	BCL10/TRAF6/CASP3/TGFB1/APAF1/OPA1	6	0
BP	GO:0050435	amyloid-beta metabolic process	4/198	66/18800	0.00517138	0.0187392	0.0106871	TNF/RELA/CASP3/BECN1	4	-1
BP	GO:0050854	regulation of antigen receptor-mediated signaling pathway	4/198	66/18800	0.00517138	0.0187392	0.0106871	BCL10/RELA/IKBKG/MALT1	4	-1
BP	GO:1902808	positive regulation of cell cycle G1/S phase transition	4/198	66/18800	0.00517138	0.0187392	0.0106871	DDX3X/AKT1/ADAMTS1/UBE2E2	4	1
BP	GO:2000514	regulation of CD4-positive, alpha-beta T cell activation	4/198	66/18800	0.00517138	0.0187392	0.0106871	SMAD7/RIPK2/MALT1/TGFBR2	4	1
BP	GO:0032410	negative regulation of transporter activity	5/198	106/18800	0.00529176	0.0191564	0.010925	SUMO1/PPIF/CAV1/PKD2/MMP9	5	1.34164
BP	GO:0042742	defense response to bacterium	10/198	364/18800	0.00535674	0.0193626	0.0110426	TNF/TNFRSF1A/TLR3/PRKCD/NOD2/RIPK2/OPTN/NOD1/SYT11/SHARPIN	10	0
BP	GO:0034284	response to monosaccharide	7/198	200/18800	0.00536463	0.0193626	0.0110426	CAT/BAD/CASP3/RAF1/FOXO3/TGFBR2/IL1A	7	0.377964
BP	GO:0050864	regulation of B cell activation	7/198	200/18800	0.00536463	0.0193626	0.0110426	BCL2/TICAM1/CD40/BAD/CASP3/NOD2/TGFB1	7	-1.88982
BP	GO:0032212	positive regulation of telomere maintenance via telomerase	3/198	34/18800	0.00541491	0.019467	0.0111022	MAPK1/MAPK3/MAP2K7	3	0.57735
BP	GO:0048536	spleen development	3/198	34/18800	0.00541491	0.019467	0.0111022	BCL2/FADD/RIPK3	3	-1.73205
BP	GO:1900181	negative regulation of protein localization to nucleus	3/198	34/18800	0.00541491	0.019467	0.0111022	SUMO1/OTUD7B/MAGED1	3	-0.57735
BP	GO:1990000	amyloid fibril formation	3/198	34/18800	0.00541491	0.019467	0.0111022	RIPK3/RIPK1/GSN	3	0.57735
BP	GO:0046637	regulation of alpha-beta T cell differentiation	4/198	67/18800	0.00545523	0.0195734	0.0111628	SMAD7/RIPK2/MALT1/TGFBR2	4	1
BP	GO:0055021	regulation of cardiac muscle tissue growth	4/198	67/18800	0.00545523	0.0195734	0.0111628	TGFBR1/PTEN/BMPR1A/TGFBR2	4	0
BP	GO:0006913	nucleocytoplasmic transport	9/198	308/18800	0.00548396	0.0196378	0.0111996	SQSTM1/PRKCD/SUMO1/PARK7/AKT1/TARDBP/TGFB1/MALT1/MMP12	9	0.333333
BP	GO:0051169	nuclear transport	9/198	308/18800	0.00548396	0.0196378	0.0111996	SQSTM1/PRKCD/SUMO1/PARK7/AKT1/TARDBP/TGFB1/MALT1/MMP12	9	0.333333
BP	GO:0035148	tube formation	6/198	152/18800	0.00550994	0.0196922	0.0112306	BCL10/TRAF6/CASP3/TGFB1/APAF1/OPA1	6	0
BP	GO:0050871	positive regulation of B cell activation	6/198	152/18800	0.00550994	0.0196922	0.0112306	BCL2/TICAM1/CD40/BAD/NOD2/TGFB1	6	-1.63299
BP	GO:0090066	regulation of anatomical structure size	12/198	487/18800	0.00561897	0.0200623	0.0114417	COMP/TNF/PRKCD/BMPR2/PTEN/NGF/CAV1/CTTN/GSN/HAX1/FN1/MMP2	12	0.57735
BP	GO:0048754	branching morphogenesis of an epithelial tube	6/198	153/18800	0.00568583	0.0201225	0.011476	BCL2/TNF/BMP2/MAGED1/PKD2/TGFBR2	6	0
BP	GO:0001660	fever generation	2/198	11/18800	0.00570202	0.0201225	0.011476	TNF/IL1A	2	0
BP	GO:0002604	regulation of dendritic cell antigen processing and presentation	2/198	11/18800	0.00570202	0.0201225	0.011476	NOD2/NOD1	2	0
BP	GO:0002732	positive regulation of dendritic cell cytokine production	2/198	11/18800	0.00570202	0.0201225	0.011476	TICAM1/NOD2	2	-1.41421
BP	GO:0003174	mitral valve development	2/198	11/18800	0.00570202	0.0201225	0.011476	BMPR2/BMPR1A	2	0
BP	GO:0031642	negative regulation of myelination	2/198	11/18800	0.00570202	0.0201225	0.011476	TNF/PTEN	2	-1.41421
BP	GO:0033234	negative regulation of protein sumoylation	2/198	11/18800	0.00570202	0.0201225	0.011476	RELA/PARK7	2	-1.41421
BP	GO:0034350	regulation of glial cell apoptotic process	2/198	11/18800	0.00570202	0.0201225	0.011476	PRKCD/TRAF2	2	0
BP	GO:0036490	regulation of translation in response to endoplasmic reticulum stress	2/198	11/18800	0.00570202	0.0201225	0.011476	DDX3X/PPP1R15B	2	-1.41421
BP	GO:1901856	negative regulation of cellular respiration	2/198	11/18800	0.00570202	0.0201225	0.011476	TNF/PPIF	2	0
BP	GO:1903299	regulation of hexokinase activity	2/198	11/18800	0.00570202	0.0201225	0.011476	BAD/COX11	2	0
BP	GO:1903799	negative regulation of production of miRNAs involved in gene silencing by miRNA	2/198	11/18800	0.00570202	0.0201225	0.011476	TNF/TGFB1	2	0
BP	GO:0021761	limbic system development	5/198	108/18800	0.00572372	0.0201796	0.0115086	UBB/PTEN/CASP3/BAX/UQCRQ	5	-0.447214
BP	GO:0010611	regulation of cardiac muscle hypertrophy	4/198	68/18800	0.0057493	0.0202502	0.0115488	TNFRSF1A/TNFRSF1B/BECN1/FOXO1	4	0
BP	GO:0010614	negative regulation of cardiac muscle hypertrophy	3/198	35/18800	0.00587719	0.0206608	0.011783	TNFRSF1A/TNFRSF1B/FOXO1	3	-0.57735
BP	GO:0070536	protein K63-linked deubiquitination	3/198	35/18800	0.00587719	0.0206608	0.011783	VCP/OTUD7B/ATXN3	3	-0.57735
BP	GO:0036503	ERAD pathway	5/198	109/18800	0.00594876	0.0208721	0.0119035	VCP/STUB1/UBE2G2/CAV1/ATXN3	5	-0.447214
BP	GO:0090263	positive regulation of canonical Wnt signaling pathway	5/198	109/18800	0.00594876	0.0208721	0.0119035	DDX3X/VCP/XIAP/TGFB1/CAV1	5	-0.447214
BP	GO:0007004	telomere maintenance via telomerase	4/198	69/18800	0.00605375	0.0211794	0.0120788	HSP90AA1/MAPK1/MAPK3/MAP2K7	4	0
BP	GO:0034394	protein localization to cell surface	4/198	69/18800	0.00605375	0.0211794	0.0120788	TNF/AKT1/USP4/COMMD1	4	1
BP	GO:0070527	platelet aggregation	4/198	69/18800	0.00605375	0.0211794	0.0120788	COMP/PRKCD/HSPB1/FN1	4	-1
BP	GO:0060070	canonical Wnt signaling pathway	9/198	313/18800	0.00607484	0.0212329	0.0121093	DDX3X/VCP/BMP2/XIAP/PTEN/TGFB1/CAV1/FOXO3/FOXO1	9	-0.333333
BP	GO:0007009	plasma membrane organization	6/198	156/18800	0.00623811	0.0217618	0.0124109	PRKCD/PTEN/AKT1/CAV1/SYT11/GSN	6	0.816497
BP	GO:0016579	protein deubiquitination	6/198	156/18800	0.00623811	0.0217618	0.0124109	VCP/PARK7/OTUD7B/USP4/ATXN3/USP2	6	0
BP	GO:0090150	establishment of protein localization to membrane	8/198	259/18800	0.00628234	0.0218952	0.012487	BID/HSP90AA1/TOMM22/COX18/OPTN/HSPA4/FIS1/BAX	8	0.707107
BP	GO:0044743	protein transmembrane import into intracellular organelle	3/198	36/18800	0.00636239	0.0221119	0.0126106	TOMM20/TOMM40/TOMM7	3	1.73205
BP	GO:0071108	protein K48-linked deubiquitination	3/198	36/18800	0.00636239	0.0221119	0.0126106	PARK7/OTUD7B/ATXN3	3	-0.57735
BP	GO:0032890	regulation of organic acid transport	4/198	70/18800	0.00636875	0.0221119	0.0126106	TNF/AKT1/FIS1/IL1A	4	1
BP	GO:0061035	regulation of cartilage development	4/198	70/18800	0.00636875	0.0221119	0.0126106	TGFBR1/BMP2/BMPR2/SMAD7	4	-2
BP	GO:0009141	nucleoside triphosphate metabolic process	5/198	111/18800	0.00641742	0.0222385	0.0126828	VCP/PINK1/TGFB1/MFN1/OPA1	5	0.447214
BP	GO:0046632	alpha-beta T cell differentiation	5/198	111/18800	0.00641742	0.0222385	0.0126828	BCL2/SMAD7/RIPK2/MALT1/TGFBR2	5	0.447214
BP	GO:0060828	regulation of canonical Wnt signaling pathway	8/198	261/18800	0.00656987	0.0227452	0.0129718	DDX3X/VCP/BMP2/XIAP/TGFB1/CAV1/FOXO3/FOXO1	8	0
BP	GO:0002698	negative regulation of immune effector process	5/198	112/18800	0.00666121	0.0230396	0.0131396	GFER/TNF/SMAD7/NOD2/TGFB1	5	-1.34164
BP	GO:0030900	forebrain development	10/198	376/18800	0.00668038	0.023084	0.013165	BMP2/UBB/HTRA2/BAD/PTEN/CASP3/APAF1/BMPR1A/BAX/UQCRQ	10	-0.632456
BP	GO:0014743	regulation of muscle hypertrophy	4/198	71/18800	0.00669445	0.0231107	0.0131802	TNFRSF1A/TNFRSF1B/BECN1/FOXO1	4	0
BP	GO:0002863	positive regulation of inflammatory response to antigenic stimulus	2/198	12/18800	0.00679523	0.0232388	0.0132533	TNF/PARK7	2	-1.41421
BP	GO:0010992	ubiquitin recycling	2/198	12/18800	0.00679523	0.0232388	0.0132533	AMBRA1/PINK1	2	-1.41421
BP	GO:0033182	regulation of histone ubiquitination	2/198	12/18800	0.00679523	0.0232388	0.0132533	PARK7/UBE2N	2	-1.41421
BP	GO:0051340	regulation of ligase activity	2/198	12/18800	0.00679523	0.0232388	0.0132533	RIPK3/AIMP2	2	0
BP	GO:0051798	positive regulation of hair follicle development	2/198	12/18800	0.00679523	0.0232388	0.0132533	TNF/TRADD	2	-1.41421
BP	GO:0061517	macrophage proliferation	2/198	12/18800	0.00679523	0.0232388	0.0132533	MAPK1/MAPK3	2	0
BP	GO:0090085	regulation of protein deubiquitination	2/198	12/18800	0.00679523	0.0232388	0.0132533	VCP/PARK7	2	-1.41421
BP	GO:0140052	cellular response to oxidised low-density lipoprotein particle stimulus	2/198	12/18800	0.00679523	0.0232388	0.0132533	TICAM1/AKT1	2	0
BP	GO:1903624	regulation of DNA catabolic process	2/198	12/18800	0.00679523	0.0232388	0.0132533	APAF1/BAX	2	1.41421
BP	GO:1903800	positive regulation of production of miRNAs involved in gene silencing by miRNA	2/198	12/18800	0.00679523	0.0232388	0.0132533	RIPK1/TGFB1	2	1.41421
BP	GO:1990845	adaptive thermogenesis	6/198	159/18800	0.00682848	0.0233306	0.0133056	PGAM5/MFN2/SLC25A5/CAV1/PPARGC1B/SLC25A4	6	0.816497
BP	GO:0032412	regulation of ion transmembrane transporter activity	8/198	263/18800	0.00686728	0.023344	0.0133133	SUMO1/PINK1/PPIF/RIPK1/CAV1/PKD2/MMP9/NDUFA4	8	1.41421
BP	GO:0006862	nucleotide transport	3/198	37/18800	0.00687079	0.023344	0.0133133	SLC25A6/SLC25A5/SLC25A4	3	0.57735
BP	GO:0014741	negative regulation of muscle hypertrophy	3/198	37/18800	0.00687079	0.023344	0.0133133	TNFRSF1A/TNFRSF1B/FOXO1	3	-0.57735
BP	GO:0038179	neurotrophin signaling pathway	3/198	37/18800	0.00687079	0.023344	0.0133133	CASP3/RAF1/NGF	3	0.57735
BP	GO:0090218	positive regulation of lipid kinase activity	3/198	37/18800	0.00687079	0.023344	0.0133133	AMBRA1/NOD2/TGFB1	3	-0.57735
BP	GO:1904358	positive regulation of telomere maintenance via telomere lengthening	3/198	37/18800	0.00687079	0.023344	0.0133133	MAPK1/MAPK3/MAP2K7	3	0.57735
BP	GO:0030330	DNA damage response, signal transduction by p53 class mediator	4/198	72/18800	0.00703099	0.0238439	0.0135984	PIDD1/CRADD/FOXO3/CASP2	4	2
BP	GO:0072078	nephron tubule morphogenesis	4/198	72/18800	0.00703099	0.0238439	0.0135984	BCL2/BMP2/MAGED1/PKD2	4	0
BP	GO:0048662	negative regulation of smooth muscle cell proliferation	4/198	73/18800	0.00737853	0.0249993	0.0142573	BMP2/MFN2/BMPR2/PTEN	4	-2
BP	GO:0002701	negative regulation of production of molecular mediator of immune response	3/198	38/18800	0.00740265	0.0250114	0.0142642	TNF/SMAD7/TGFB1	3	-0.57735
BP	GO:0045622	regulation of T-helper cell differentiation	3/198	38/18800	0.00740265	0.0250114	0.0142642	SMAD7/RIPK2/MALT1	3	0.57735
BP	GO:1902229	regulation of intrinsic apoptotic signaling pathway in response to DNA damage	3/198	38/18800	0.00740265	0.0250114	0.0142642	BCL2/BID/BCL2L1	3	-1.73205
BP	GO:0050680	negative regulation of epithelial cell proliferation	6/198	163/18800	0.00767735	0.0259155	0.0147798	TNF/TGFBR1/PTEN/TGFB1/MAGED1/CAV1	6	0
BP	GO:0050900	leukocyte migration	10/198	384/18800	0.00769529	0.0259521	0.0148007	FADD/RIPK3/TNF/NOD2/MAPK1/AKT1/MAPK3/MMP9/DNM1L/IL1A	10	0
BP	GO:0050688	regulation of defense response to virus	4/198	74/18800	0.0077372	0.0260212	0.0148401	HSP90AA1/TRAF3/HTRA1/MMP12	4	1
BP	GO:0060420	regulation of heart growth	4/198	74/18800	0.0077372	0.0260212	0.0148401	TGFBR1/PTEN/BMPR1A/TGFBR2	4	0
BP	GO:0072088	nephron epithelium morphogenesis	4/198	74/18800	0.0077372	0.0260212	0.0148401	BCL2/BMP2/MAGED1/PKD2	4	0
BP	GO:0032570	response to progesterone	3/198	39/18800	0.00795823	0.0265288	0.0151296	BAD/TGFB1/CAV1	3	0.57735
BP	GO:0042307	positive regulation of protein import into nucleus	3/198	39/18800	0.00795823	0.0265288	0.0151296	PRKCD/TARDBP/TGFB1	3	0.57735
BP	GO:0071634	regulation of transforming growth factor beta production	3/198	39/18800	0.00795823	0.0265288	0.0151296	LUM/BMPR1A/FN1	3	0.57735
BP	GO:1904994	regulation of leukocyte adhesion to vascular endothelial cell	3/198	39/18800	0.00795823	0.0265288	0.0151296	TNF/TRAF6/RELA	3	-1.73205
BP	GO:2000516	positive regulation of CD4-positive, alpha-beta T cell activation	3/198	39/18800	0.00795823	0.0265288	0.0151296	RIPK2/MALT1/TGFBR2	3	1.73205
BP	GO:0032621	interleukin-18 production	2/198	13/18800	0.00797537	0.0265288	0.0151296	TNF/NOD2	2	-1.41421
BP	GO:0032661	regulation of interleukin-18 production	2/198	13/18800	0.00797537	0.0265288	0.0151296	TNF/NOD2	2	-1.41421
BP	GO:0061430	bone trabecula morphogenesis	2/198	13/18800	0.00797537	0.0265288	0.0151296	PPARGC1B/MMP2	2	1.41421
BP	GO:0070424	regulation of nucleotide-binding oligomerization domain containing signaling pathway	2/198	13/18800	0.00797537	0.0265288	0.0151296	XIAP/BIRC3	2	0
BP	GO:0072683	T cell extravasation	2/198	13/18800	0.00797537	0.0265288	0.0151296	FADD/RIPK3	2	-1.41421
BP	GO:1900103	positive regulation of endoplasmic reticulum unfolded protein response	2/198	13/18800	0.00797537	0.0265288	0.0151296	BAK1/BAX	2	0
BP	GO:1903265	positive regulation of tumor necrosis factor-mediated signaling pathway	2/198	13/18800	0.00797537	0.0265288	0.0151296	RIPK1/TRAF2	2	1.41421
BP	GO:0006278	RNA-templated DNA biosynthetic process	4/198	75/18800	0.00810716	0.0269181	0.0153516	HSP90AA1/MAPK1/MAPK3/MAP2K7	4	0
BP	GO:0043536	positive regulation of blood vessel endothelial cell migration	4/198	75/18800	0.00810716	0.0269181	0.0153516	CD40/HSPB1/AKT1/TGFB1	4	0
BP	GO:0048568	embryonic organ development	11/198	449/18800	0.0082132	0.0272454	0.0155383	CASP8/TNF/TGFBR1/BIRC6/MAPK1/AKT1/TGFB1/BMPR1A/MAPK3/PKD2/TGFBR2	11	0.301511
BP	GO:0045787	positive regulation of cell cycle	9/198	329/18800	0.00830027	0.0275092	0.0156887	DDX3X/TNF/AKT1/BECN1/ADAMTS1/UBE2E2/PKD2/USP2/IL1A	9	1.66667
BP	GO:0015931	nucleobase-containing compound transport	7/198	218/18800	0.0084584	0.0280079	0.0159731	SLC25A6/SLC25A5/RIPK1/LRPPRC/TOMM20/TGFBR2/SLC25A4	7	1.88982
BP	GO:0061333	renal tubule morphogenesis	4/198	76/18800	0.00848854	0.0280822	0.0160155	BCL2/BMP2/MAGED1/PKD2	4	0
BP	GO:0010719	negative regulation of epithelial to mesenchymal transition	3/198	40/18800	0.00853775	0.0281649	0.0160626	SMAD7/PTEN/PPP2CA	3	-0.57735
BP	GO:0016233	telomere capping	3/198	40/18800	0.00853775	0.0281649	0.0160626	MAPK1/MAPK3/MAP2K7	3	0.57735
BP	GO:0097009	energy homeostasis	3/198	40/18800	0.00853775	0.0281649	0.0160626	SQSTM1/UBB/FOXO1	3	-0.57735
BP	GO:0045471	response to ethanol	5/198	119/18800	0.00855211	0.0281649	0.0160626	BAK1/CASP8/TNF/CAT/BAD	5	-2.23607
BP	GO:0051928	positive regulation of calcium ion transport	5/198	119/18800	0.00855211	0.0281649	0.0160626	BAK1/SUMO1/CAV1/PKD2/BAX	5	0.447214
BP	GO:0016055	Wnt signaling pathway	11/198	452/18800	0.00860912	0.028327	0.0161551	DDX3X/VCP/BMP2/XIAP/PTEN/TGFB1/CAV1/PPP2CA/PKD2/FOXO3/FOXO1	11	0.301511
BP	GO:0051651	maintenance of location in cell	7/198	219/18800	0.00866204	0.0284755	0.0162398	PARK7/PINK1/AKT1/CAV1/PKD2/GSN/BAX	7	1.13389
BP	GO:0198738	cell-cell signaling by wnt	11/198	454/18800	0.0088812	0.0291182	0.0166063	DDX3X/VCP/BMP2/XIAP/PTEN/TGFB1/CAV1/PPP2CA/PKD2/FOXO3/FOXO1	11	0.301511
BP	GO:0032729	positive regulation of interferon-gamma production	4/198	77/18800	0.00888148	0.0291182	0.0166063	FADD/TNF/TLR3/RIPK2	4	-1
BP	GO:0072028	nephron morphogenesis	4/198	77/18800	0.00888148	0.0291182	0.0166063	BCL2/BMP2/MAGED1/PKD2	4	0
BP	GO:0007517	muscle organ development	9/198	334/18800	0.00910934	0.0297868	0.0169876	BCL2/TGFBR1/BMP2/CFLAR/SMAD7/TGFB1/BMPR1A/CAV1/USP2	9	-0.333333
BP	GO:0010463	mesenchymal cell proliferation	3/198	41/18800	0.00914144	0.0297868	0.0169876	BMP2/BMPR1A/TGFBR2	3	0.57735
BP	GO:0046688	response to copper ion	3/198	41/18800	0.00914144	0.0297868	0.0169876	PARK7/BECN1/IL1A	3	0.57735
BP	GO:0071548	response to dexamethasone	3/198	41/18800	0.00914144	0.0297868	0.0169876	CASP9/CFLAR/FOXO3	3	-0.57735
BP	GO:0072595	maintenance of protein localization in organelle	3/198	41/18800	0.00914144	0.0297868	0.0169876	PARK7/PINK1/AKT1	3	-0.57735
BP	GO:2000008	regulation of protein localization to cell surface	3/198	41/18800	0.00914144	0.0297868	0.0169876	TNF/AKT1/COMMD1	3	0.57735
BP	GO:0038127	ERBB signaling pathway	5/198	121/18800	0.00915413	0.0297868	0.0169876	STUB1/MAPK1/AKT1/TGFB1/MMP9	5	0.447214
BP	GO:0003222	ventricular trabecula myocardium morphogenesis	2/198	14/18800	0.00924052	0.0297868	0.0169876	TGFBR1/BMPR1A	2	0
BP	GO:0009886	post-embryonic animal morphogenesis	2/198	14/18800	0.00924052	0.0297868	0.0169876	BAK1/BAX	2	0
BP	GO:0033033	negative regulation of myeloid cell apoptotic process	2/198	14/18800	0.00924052	0.0297868	0.0169876	BCL2/NOD2	2	-1.41421
BP	GO:0034309	primary alcohol biosynthetic process	2/198	14/18800	0.00924052	0.0297868	0.0169876	BMP2/PARK7	2	-1.41421
BP	GO:0048070	regulation of developmental pigmentation	2/198	14/18800	0.00924052	0.0297868	0.0169876	BCL2/BAX	2	0
BP	GO:0051547	regulation of keratinocyte migration	2/198	14/18800	0.00924052	0.0297868	0.0169876	PTEN/MMP9	2	0
BP	GO:0071801	regulation of podosome assembly	2/198	14/18800	0.00924052	0.0297868	0.0169876	TNF/GSN	2	0
BP	GO:0120305	regulation of pigmentation	2/198	14/18800	0.00924052	0.0297868	0.0169876	BCL2/BAX	2	0
BP	GO:1903729	regulation of plasma membrane organization	2/198	14/18800	0.00924052	0.0297868	0.0169876	PRKCD/GSN	2	0
BP	GO:1903894	regulation of IRE1-mediated unfolded protein response	2/198	14/18800	0.00924052	0.0297868	0.0169876	BAK1/BAX	2	0
BP	GO:1904294	positive regulation of ERAD pathway	2/198	14/18800	0.00924052	0.0297868	0.0169876	CAV1/ATXN3	2	1.41421
BP	GO:2001171	positive regulation of ATP biosynthetic process	2/198	14/18800	0.00924052	0.0297868	0.0169876	VCP/PINK1	2	-1.41421
BP	GO:0007492	endoderm development	4/198	78/18800	0.00928612	0.0298547	0.0170263	BMPR1A/MMP9/FN1/MMP2	4	2
BP	GO:0033077	T cell differentiation in thymus	4/198	78/18800	0.00928612	0.0298547	0.0170263	BCL2/FADD/RIPK3/IL1A	4	-1
BP	GO:1902369	negative regulation of RNA catabolic process	4/198	78/18800	0.00928612	0.0298547	0.0170263	TARDBP/TRAF2/LRPPRC/TRAF5	4	2
BP	GO:0050769	positive regulation of neurogenesis	7/198	222/18800	0.00929459	0.0298556	0.0170269	TNF/BMP2/BMPR2/TNFRSF1B/TGFB1/NGF/FN1	7	-0.377964
BP	GO:0031214	biomineral tissue development	6/198	170/18800	0.00934208	0.0299554	0.0170838	COMP/BMP2/BMPR2/TGFB1/BMPR1A/MMP13	6	0
BP	GO:0043487	regulation of RNA stability	6/198	170/18800	0.00934208	0.0299554	0.0170838	PRKCD/TNFRSF1B/AKT1/TARDBP/TRAF2/TRAF5	6	0.816497
BP	GO:0030111	regulation of Wnt signaling pathway	9/198	336/18800	0.00944919	0.0302723	0.0172645	DDX3X/VCP/BMP2/XIAP/TGFB1/CAV1/PPP2CA/FOXO3/FOXO1	9	0.333333
BP	GO:1990778	protein localization to cell periphery	9/198	337/18800	0.00962268	0.0307889	0.0175591	SQSTM1/TNF/TNFRSF1A/BCL2L1/IKBKB/AKT1/TGFB1/OPTN/CAV1	9	-0.333333
BP	GO:0043542	endothelial cell migration	8/198	279/18800	0.00962732	0.0307889	0.0175591	TNF/TGFBR1/CD40/BMPR2/HSPB1/PTEN/AKT1/TGFB1	8	-1.41421
BP	GO:0048708	astrocyte differentiation	4/198	79/18800	0.00970258	0.0309752	0.0176654	TNF/BMP2/MAPK1/MAPK3	4	-1
BP	GO:0072332	intrinsic apoptotic signaling pathway by p53 class mediator	4/198	79/18800	0.00970258	0.0309752	0.0176654	BCL2/UBB/CASP6/BAX	4	0
BP	GO:0046777	protein autophosphorylation	7/198	224/18800	0.00973469	0.0310205	0.0176912	RIPK3/DDX3X/PINK1/AKT1/RIPK1/MAPK3/CAV1	7	0.377964
BP	GO:0030890	positive regulation of B cell proliferation	3/198	42/18800	0.00976948	0.0310205	0.0176912	BCL2/TICAM1/CD40	3	-1.73205
BP	GO:0045022	early endosome to late endosome transport	3/198	42/18800	0.00976948	0.0310205	0.0176912	MAPK1/BECN1/MAPK3	3	0.57735
BP	GO:0045687	positive regulation of glial cell differentiation	3/198	42/18800	0.00976948	0.0310205	0.0176912	BMP2/TNFRSF1B/TGFB1	3	-0.57735
BP	GO:0060964	regulation of miRNA-mediated gene silencing	3/198	42/18800	0.00976948	0.0310205	0.0176912	TNF/RIPK1/TGFB1	3	0.57735
BP	GO:1904591	positive regulation of protein import	3/198	42/18800	0.00976948	0.0310205	0.0176912	PRKCD/TARDBP/TGFB1	3	0.57735
BP	GO:0001704	formation of primary germ layer	5/198	123/18800	0.00978477	0.0310205	0.0176912	BMPR2/BMPR1A/MMP9/FN1/MMP2	5	1.34164
BP	GO:0097237	cellular response to toxic substance	5/198	123/18800	0.00978477	0.0310205	0.0176912	GFER/TNF/CAT/PARK7/PINK1	5	-2.23607
BP	GO:0110148	biomineralization	6/198	172/18800	0.00986164	0.0312371	0.0178147	COMP/BMP2/BMPR2/TGFB1/BMPR1A/MMP13	6	0
BP	GO:0050920	regulation of chemotaxis	7/198	225/18800	0.00996037	0.0315225	0.0179775	BMPR2/HSPB1/NOD2/MAPK1/TGFB1/MAPK3/DNM1L	7	-0.377964
BP	GO:1904375	regulation of protein localization to cell periphery	5/198	124/18800	0.010111	0.0319715	0.0182336	SQSTM1/TNF/BCL2L1/AKT1/TGFB1	5	-0.447214
BP	GO:0007259	receptor signaling pathway via JAK-STAT	6/198	173/18800	0.010129	0.0319792	0.018238	TNF/TNFRSF1A/CD40/CAV1/PPP2CA/PKD2	6	0
BP	GO:0021954	central nervous system neuron development	4/198	80/18800	0.010131	0.0319792	0.018238	HSP90AA1/UBB/PTEN/UQCRQ	4	-1
BP	GO:0042770	signal transduction in response to DNA damage	6/198	174/18800	0.0104015	0.0327557	0.0186808	CASP9/BID/PIDD1/CRADD/FOXO3/CASP2	6	0.816497
BP	GO:0070646	protein modification by small protein removal	6/198	174/18800	0.0104015	0.0327557	0.0186808	VCP/PARK7/OTUD7B/USP4/ATXN3/USP2	6	0
BP	GO:0071364	cellular response to epidermal growth factor stimulus	3/198	43/18800	0.0104221	0.0327557	0.0186808	CFLAR/AKT1/BECN1	3	0.57735
BP	GO:0071604	transforming growth factor beta production	3/198	43/18800	0.0104221	0.0327557	0.0186808	LUM/BMPR1A/FN1	3	0.57735
BP	GO:0090317	negative regulation of intracellular protein transport	3/198	43/18800	0.0104221	0.0327557	0.0186808	UBE2G2/SUMO1/PARK7	3	-1.73205
BP	GO:0072659	protein localization to plasma membrane	8/198	283/18800	0.0104308	0.0327557	0.0186808	SQSTM1/TNF/TNFRSF1A/BCL2L1/IKBKB/AKT1/TGFB1/OPTN	8	-0.707107
BP	GO:0006446	regulation of translational initiation	4/198	81/18800	0.0105715	0.0329118	0.0187698	DDX3X/TNF/PPP1R15B/HSPB1	4	-2
BP	GO:0010660	regulation of muscle cell apoptotic process	4/198	81/18800	0.0105715	0.0329118	0.0187698	MAP3K5/MFN2/CFLAR/SIRT5	4	-2
BP	GO:0010833	telomere maintenance via telomere lengthening	4/198	81/18800	0.0105715	0.0329118	0.0187698	HSP90AA1/MAPK1/MAPK3/MAP2K7	4	0
BP	GO:0002468	dendritic cell antigen processing and presentation	2/198	15/18800	0.0105888	0.0329118	0.0187698	NOD2/NOD1	2	0
BP	GO:0010763	positive regulation of fibroblast migration	2/198	15/18800	0.0105888	0.0329118	0.0187698	AKT1/TGFB1	2	1.41421
BP	GO:0045475	locomotor rhythm	2/198	15/18800	0.0105888	0.0329118	0.0187698	PTEN/USP2	2	0
BP	GO:0048308	organelle inheritance	2/198	15/18800	0.0105888	0.0329118	0.0187698	MAPK1/MAPK3	2	0
BP	GO:0048313	Golgi inheritance	2/198	15/18800	0.0105888	0.0329118	0.0187698	MAPK1/MAPK3	2	0
BP	GO:0061307	cardiac neural crest cell differentiation involved in heart development	2/198	15/18800	0.0105888	0.0329118	0.0187698	MAPK1/MAPK3	2	0
BP	GO:0061308	cardiac neural crest cell development involved in heart development	2/198	15/18800	0.0105888	0.0329118	0.0187698	MAPK1/MAPK3	2	0
BP	GO:1902902	negative regulation of autophagosome assembly	2/198	15/18800	0.0105888	0.0329118	0.0187698	PINK1/BECN1	2	0
BP	GO:2000345	regulation of hepatocyte proliferation	2/198	15/18800	0.0105888	0.0329118	0.0187698	TNF/CFLAR	2	-1.41421
BP	GO:0048705	skeletal system morphogenesis	7/198	228/18800	0.0106603	0.033106	0.0188806	COMP/TGFBR1/BMPR2/TGFBR2/PPARGC1B/MMP13/MMP2	7	0.377964
BP	GO:0051656	establishment of organelle localization	10/198	404/18800	0.0107549	0.0333714	0.019032	UBB/IKBKG/RHOT2/HDAC6/PINK1/BECN1/LRPPRC/RHOT1/SYT11/OPA1	10	0
BP	GO:0034655	nucleobase-containing compound catabolic process	10/198	405/18800	0.0109291	0.0338831	0.0193238	VCP/PRKCD/TNFRSF1B/AKT1/TARDBP/TRAF2/APAF1/LRPPRC/TRAF5/BAX	10	1.26491
BP	GO:0042310	vasoconstriction	4/198	82/18800	0.0110242	0.0341487	0.0194753	COMP/BMPR2/CAV1/MMP2	4	0
BP	GO:0060147	regulation of post-transcriptional gene silencing	3/198	44/18800	0.0110994	0.0342653	0.0195418	TNF/RIPK1/TGFB1	3	0.57735
BP	GO:0060443	mammary gland morphogenesis	3/198	44/18800	0.0110994	0.0342653	0.0195418	CAV1/TGFBR2/BAX	3	1.73205
BP	GO:0062208	positive regulation of pattern recognition receptor signaling pathway	3/198	44/18800	0.0110994	0.0342653	0.0195418	DDX3X/TLR3/CAV1	3	-0.57735
BP	GO:1900368	regulation of post-transcriptional gene silencing by RNA	3/198	44/18800	0.0110994	0.0342653	0.0195418	TNF/RIPK1/TGFB1	3	0.57735
BP	GO:0030336	negative regulation of cell migration	9/198	346/18800	0.0112945	0.0348381	0.0198684	BCL2/TNF/RNF41/SMAD7/PTEN/AKT1/TGFB1/BMPR1A/FOXO3	9	-0.333333
BP	GO:0014032	neural crest cell development	4/198	83/18800	0.0114892	0.035324	0.0201456	MAPK1/BMPR1A/MAPK3/FN1	4	1
BP	GO:0032413	negative regulation of ion transmembrane transporter activity	4/198	83/18800	0.0114892	0.035324	0.0201456	SUMO1/CAV1/PKD2/MMP9	4	1
BP	GO:0048678	response to axon injury	4/198	83/18800	0.0114892	0.035324	0.0201456	BCL2/PTEN/BAX/MMP2	4	0
BP	GO:0045931	positive regulation of mitotic cell cycle	5/198	128/18800	0.0114907	0.035324	0.0201456	DDX3X/AKT1/ADAMTS1/UBE2E2/USP2	5	1.34164
BP	GO:0001936	regulation of endothelial cell proliferation	6/198	178/18800	0.0115436	0.0354567	0.0202212	TNF/TGFBR1/BMP2/BMPR2/AKT1/CAV1	6	-0.816497
BP	GO:0002861	regulation of inflammatory response to antigenic stimulus	3/198	45/18800	0.0118016	0.0360669	0.0205692	TNF/PARK7/NOD2	3	-1.73205
BP	GO:0046006	regulation of activated T cell proliferation	3/198	45/18800	0.0118016	0.0360669	0.0205692	FADD/RIPK3/CASP3	3	-1.73205
BP	GO:0098927	vesicle-mediated transport between endosomal compartments	3/198	45/18800	0.0118016	0.0360669	0.0205692	MAPK1/BECN1/MAPK3	3	0.57735
BP	GO:1902622	regulation of neutrophil migration	3/198	45/18800	0.0118016	0.0360669	0.0205692	NOD2/DNM1L/IL1A	3	0.57735
BP	GO:1990090	cellular response to nerve growth factor stimulus	3/198	45/18800	0.0118016	0.0360669	0.0205692	AKT1/NGF/FOXO3	3	1.73205
BP	GO:2000273	positive regulation of signaling receptor activity	3/198	45/18800	0.0118016	0.0360669	0.0205692	PARK7/HDAC6/PINK1	3	-1.73205
BP	GO:0043409	negative regulation of MAPK cascade	6/198	179/18800	0.0118424	0.0361614	0.0206231	BMP2/PRKCD/PTEN/PINK1/CAV1/FOXO1	6	-0.816497
BP	GO:0051899	membrane depolarization	4/198	84/18800	0.0119666	0.0363939	0.0207557	BCL2/PARK7/SMAD7/CAV1	4	-1
BP	GO:0006878	cellular copper ion homeostasis	2/198	16/18800	0.0120183	0.0363939	0.0207557	SCO1/COX19	2	1.41421
BP	GO:0010224	response to UV-B	2/198	16/18800	0.0120183	0.0363939	0.0207557	BCL2/RELA	2	-1.41421
BP	GO:0023035	CD40 signaling pathway	2/198	16/18800	0.0120183	0.0363939	0.0207557	CD40/SHARPIN	2	0
BP	GO:0031649	heat generation	2/198	16/18800	0.0120183	0.0363939	0.0207557	TNF/IL1A	2	0
BP	GO:0035970	peptidyl-threonine dephosphorylation	2/198	16/18800	0.0120183	0.0363939	0.0207557	PGAM5/PPP2CA	2	0
BP	GO:0042532	negative regulation of tyrosine phosphorylation of STAT protein	2/198	16/18800	0.0120183	0.0363939	0.0207557	CAV1/PPP2CA	2	1.41421
BP	GO:0051044	positive regulation of membrane protein ectodomain proteolysis	2/198	16/18800	0.0120183	0.0363939	0.0207557	TNF/TNFRSF1B	2	-1.41421
BP	GO:0061684	chaperone-mediated autophagy	2/198	16/18800	0.0120183	0.0363939	0.0207557	HSP90AA1/STUB1	2	-1.41421
BP	GO:0070242	thymocyte apoptotic process	2/198	16/18800	0.0120183	0.0363939	0.0207557	BAK1/BAX	2	0
BP	GO:0048738	cardiac muscle tissue development	7/198	234/18800	0.0121667	0.0367822	0.0209772	TGFBR1/BMP2/SMAD7/PTEN/TGFB1/BMPR1A/TGFBR2	7	-0.377964
BP	GO:0060560	developmental growth involved in morphogenesis	7/198	234/18800	0.0121667	0.0367822	0.0209772	HSP90AA1/HDAC6/BMPR2/NGF/CTTN/TGFBR2/FN1	7	0.377964
BP	GO:0042063	gliogenesis	8/198	291/18800	0.0121858	0.0368096	0.0209928	TNF/BMP2/PTEN/TNFRSF1B/MAPK1/AKT1/TGFB1/MAPK3	8	-0.707107
BP	GO:0030168	platelet activation	5/198	130/18800	0.0122264	0.0368712	0.0210279	COMP/CD40/PRKCD/HSPB1/FN1	5	-1.34164
BP	GO:0042476	odontogenesis	5/198	130/18800	0.0122264	0.0368712	0.0210279	BMP2/TRAF6/BMPR1A/HTRA1/BAX	5	0.447214
BP	GO:0046889	positive regulation of lipid biosynthetic process	4/198	85/18800	0.0124566	0.0375035	0.0213885	TNF/PRKCD/AKT1/IL1A	4	0
BP	GO:0071229	cellular response to acid chemical	4/198	85/18800	0.0124566	0.0375035	0.0213885	TNF/BCL2L1/PKD2/MMP2	4	0
BP	GO:0010665	regulation of cardiac muscle cell apoptotic process	3/198	46/18800	0.0125288	0.0375966	0.0214416	MAP3K5/CFLAR/SIRT5	3	-1.73205
BP	GO:0031018	endocrine pancreas development	3/198	46/18800	0.0125288	0.0375966	0.0214416	BAK1/BAD/AKT1	3	-0.57735
BP	GO:0035987	endodermal cell differentiation	3/198	46/18800	0.0125288	0.0375966	0.0214416	MMP9/FN1/MMP2	3	1.73205
BP	GO:0060966	regulation of gene silencing by RNA	3/198	46/18800	0.0125288	0.0375966	0.0214416	TNF/RIPK1/TGFB1	3	0.57735
BP	GO:0010595	positive regulation of endothelial cell migration	5/198	131/18800	0.012606	0.0377972	0.021556	CD40/BMPR2/HSPB1/AKT1/TGFB1	5	-0.447214
BP	GO:0050728	negative regulation of inflammatory response	6/198	182/18800	0.0127716	0.0382623	0.0218213	TNFRSF1A/PRKCD/TNFRSF1B/NOD2/SYT11/SHARPIN	6	-0.816497
BP	GO:0030433	ubiquitin-dependent ERAD pathway	4/198	86/18800	0.0129593	0.0387928	0.0221239	VCP/STUB1/UBE2G2/CAV1	4	-1
BP	GO:0010565	regulation of cellular ketone metabolic process	5/198	132/18800	0.0129934	0.0388632	0.022164	BMP2/PARK7/SIRT5/AKT1/CAV1	5	-0.447214
BP	GO:0001774	microglial cell activation	3/198	47/18800	0.0132811	0.0395615	0.0225622	TNF/TLR3/SYT11	3	-0.57735
BP	GO:0031648	protein destabilization	3/198	47/18800	0.0132811	0.0395615	0.0225622	BMP2/HDAC6/GSN	3	-0.57735
BP	GO:0045601	regulation of endothelial cell differentiation	3/198	47/18800	0.0132811	0.0395615	0.0225622	TNF/TNFRSF1A/IKBKB	3	-1.73205
BP	GO:1905953	negative regulation of lipid localization	3/198	47/18800	0.0132811	0.0395615	0.0225622	TNF/AKT1/FIS1	3	0.57735
BP	GO:1990089	response to nerve growth factor	3/198	47/18800	0.0132811	0.0395615	0.0225622	AKT1/NGF/FOXO3	3	1.73205
BP	GO:0043588	skin development	8/198	296/18800	0.0133877	0.039833	0.022717	COMP/BCL2/TNF/RELA/TRADD/CASP3/SHARPIN/IL1A	8	-1.41421
BP	GO:0016032	viral process	10/198	418/18800	0.0133941	0.039833	0.022717	BCL2/DDX3X/TNF/BCL2L1/VCP/CALCOCO2/EPS15/TARDBP/CAV1/GSN	10	-1.26491
BP	GO:0001960	negative regulation of cytokine-mediated signaling pathway	4/198	87/18800	0.0134747	0.039839	0.0227205	XIAP/CAV1/CARD8/MMP12	4	1
BP	GO:0009791	post-embryonic development	4/198	87/18800	0.0134747	0.039839	0.0227205	BAK1/BCL2/TGFBR1/BAX	4	-1
BP	GO:0055017	cardiac muscle tissue growth	4/198	87/18800	0.0134747	0.039839	0.0227205	TGFBR1/PTEN/BMPR1A/TGFBR2	4	0
BP	GO:0003198	epithelial to mesenchymal transition involved in endocardial cushion formation	2/198	17/18800	0.0135271	0.039839	0.0227205	TGFBR1/TGFBR2	2	0
BP	GO:0006390	mitochondrial transcription	2/198	17/18800	0.0135271	0.039839	0.0227205	FOXO3/PPARGC1B	2	1.41421
BP	GO:0010566	regulation of ketone biosynthetic process	2/198	17/18800	0.0135271	0.039839	0.0227205	BMP2/SIRT5	2	-1.41421
BP	GO:0016045	detection of bacterium	2/198	17/18800	0.0135271	0.039839	0.0227205	NOD2/NOD1	2	0
BP	GO:0034134	toll-like receptor 2 signaling pathway	2/198	17/18800	0.0135271	0.039839	0.0227205	NOD2/RIPK2	2	0
BP	GO:0048569	post-embryonic animal organ development	2/198	17/18800	0.0135271	0.039839	0.0227205	BAK1/BAX	2	0
BP	GO:0090594	inflammatory response to wounding	2/198	17/18800	0.0135271	0.039839	0.0227205	TGFB1/IL1A	2	1.41421
BP	GO:1903358	regulation of Golgi organization	2/198	17/18800	0.0135271	0.039839	0.0227205	MAPK1/MAPK3	2	0
BP	GO:2000811	negative regulation of anoikis	2/198	17/18800	0.0135271	0.039839	0.0227205	BCL2/CAV1	2	0
BP	GO:0007565	female pregnancy	6/198	185/18800	0.0137508	0.0404324	0.0230589	BCL2/BMPR2/AKT1/MMP9/TGFBR2/MMP2	6	0.816497
BP	GO:0061138	morphogenesis of a branching epithelium	6/198	185/18800	0.0137508	0.0404324	0.0230589	BCL2/TNF/BMP2/MAGED1/PKD2/TGFBR2	6	0
BP	GO:0001889	liver development	5/198	134/18800	0.0137924	0.0405221	0.02311	GFER/TNF/RELA/CFLAR/PKD2	5	-1.34164
BP	GO:0048864	stem cell development	4/198	88/18800	0.014003	0.0410732	0.0234243	MAPK1/BMPR1A/MAPK3/FN1	4	1
BP	GO:0006953	acute-phase response	3/198	48/18800	0.0140587	0.0410732	0.0234243	TNF/IL1A/FN1	3	0.57735
BP	GO:0010662	regulation of striated muscle cell apoptotic process	3/198	48/18800	0.0140587	0.0410732	0.0234243	MAP3K5/CFLAR/SIRT5	3	-1.73205
BP	GO:0050798	activated T cell proliferation	3/198	48/18800	0.0140587	0.0410732	0.0234243	FADD/RIPK3/CASP3	3	-1.73205
BP	GO:0061028	establishment of endothelial barrier	3/198	48/18800	0.0140587	0.0410732	0.0234243	TNF/TNFRSF1A/IKBKB	3	-1.73205
BP	GO:1902003	regulation of amyloid-beta formation	3/198	48/18800	0.0140587	0.0410732	0.0234243	TNF/RELA/CASP3	3	-1.73205
BP	GO:1903426	regulation of reactive oxygen species biosynthetic process	3/198	48/18800	0.0140587	0.0410732	0.0234243	PARK7/CFLAR/FOXO3	3	-0.57735
BP	GO:0051302	regulation of cell division	6/198	186/18800	0.0140885	0.0411273	0.0234552	BCL2L1/CAT/BIRC6/BECN1/TGFB1/IL1A	6	0
BP	GO:0030879	mammary gland development	5/198	135/18800	0.014204	0.0414312	0.0236285	MAPK1/AKT1/CAV1/TGFBR2/BAX	5	1.34164
BP	GO:0001942	hair follicle development	4/198	89/18800	0.0145443	0.0423467	0.0241507	BCL2/TNF/RELA/TRADD	4	-2
BP	GO:0050767	regulation of neurogenesis	9/198	361/18800	0.0145527	0.0423467	0.0241507	TNF/BMP2/BMPR2/PTEN/TNFRSF1B/TGFB1/BMPR1A/NGF/FN1	9	-0.333333
BP	GO:2000146	negative regulation of cell motility	9/198	361/18800	0.0145527	0.0423467	0.0241507	BCL2/TNF/RNF41/SMAD7/PTEN/AKT1/TGFB1/BMPR1A/FOXO3	9	-0.333333
BP	GO:0045667	regulation of osteoblast differentiation	5/198	136/18800	0.0146238	0.0425197	0.0242493	ESRRA/TNF/BMP2/BMPR2/BMPR1A	5	-1.34164
BP	GO:0000959	mitochondrial RNA metabolic process	3/198	49/18800	0.0148617	0.0431428	0.0246047	LRPPRC/FOXO3/PPARGC1B	3	1.73205
BP	GO:0030850	prostate gland development	3/198	49/18800	0.0148617	0.0431428	0.0246047	PTEN/MMP2/TNC	3	0.57735
BP	GO:0061008	hepaticobiliary system development	5/198	137/18800	0.0150518	0.0433906	0.024746	GFER/TNF/RELA/CFLAR/PKD2	5	-1.34164
BP	GO:0002923	regulation of humoral immune response mediated by circulating immunoglobulin	2/198	18/18800	0.0151136	0.0433906	0.024746	TNF/NOD2	2	-1.41421
BP	GO:0006309	apoptotic DNA fragmentation	2/198	18/18800	0.0151136	0.0433906	0.024746	APAF1/BAX	2	1.41421
BP	GO:0010759	positive regulation of macrophage chemotaxis	2/198	18/18800	0.0151136	0.0433906	0.024746	MAPK1/MAPK3	2	0
BP	GO:0019896	axonal transport of mitochondrion	2/198	18/18800	0.0151136	0.0433906	0.024746	HDAC6/OPA1	2	0
BP	GO:0030540	female genitalia development	2/198	18/18800	0.0151136	0.0433906	0.024746	BAK1/BAX	2	0
BP	GO:0043217	myelin maintenance	2/198	18/18800	0.0151136	0.0433906	0.024746	PTEN/AKT1	2	0
BP	GO:0060044	negative regulation of cardiac muscle cell proliferation	2/198	18/18800	0.0151136	0.0433906	0.024746	PTEN/TGFBR2	2	0
BP	GO:0060965	negative regulation of miRNA-mediated gene silencing	2/198	18/18800	0.0151136	0.0433906	0.024746	TNF/TGFB1	2	0
BP	GO:0061687	detoxification of inorganic compound	2/198	18/18800	0.0151136	0.0433906	0.024746	CAT/PARK7	2	-1.41421
BP	GO:0071360	cellular response to exogenous dsRNA	2/198	18/18800	0.0151136	0.0433906	0.024746	TLR3/CAV1	2	0
BP	GO:0150079	negative regulation of neuroinflammatory response	2/198	18/18800	0.0151136	0.0433906	0.024746	TNFRSF1B/SYT11	2	0
BP	GO:2000319	regulation of T-helper 17 cell differentiation	2/198	18/18800	0.0151136	0.0433906	0.024746	SMAD7/MALT1	2	0
BP	GO:2000641	regulation of early endosome to late endosome transport	2/198	18/18800	0.0151136	0.0433906	0.024746	MAPK1/MAPK3	2	0
BP	GO:0045926	negative regulation of growth	7/198	245/18800	0.0153183	0.0439437	0.0250614	BCL2/DDX3X/BMPR2/PTEN/TGFB1/PPP2CA/TGFBR2	7	-0.377964
BP	GO:0007369	gastrulation	6/198	190/18800	0.0154975	0.0443881	0.0253149	BMPR2/BMPR1A/MMP9/TGFBR2/FN1/MMP2	6	1.63299
BP	GO:0060401	cytosolic calcium ion transport	6/198	190/18800	0.0154975	0.0443881	0.0253149	BAK1/BCL2/CAV1/PKD2/VDAC1/BAX	6	0.816497
BP	GO:0060021	roof of mouth development	4/198	91/18800	0.0156662	0.0446595	0.0254697	TGFBR1/SUMO1/BMPR1A/TGFBR2	4	0
BP	GO:0072080	nephron tubule development	4/198	91/18800	0.0156662	0.0446595	0.0254697	BCL2/BMP2/MAGED1/PKD2	4	0
BP	GO:0002269	leukocyte activation involved in inflammatory response	3/198	50/18800	0.0156902	0.0446595	0.0254697	TNF/TLR3/SYT11	3	-0.57735
BP	GO:0030857	negative regulation of epithelial cell differentiation	3/198	50/18800	0.0156902	0.0446595	0.0254697	CAV1/MMP9/IL1A	3	1.73205
BP	GO:0042149	cellular response to glucose starvation	3/198	50/18800	0.0156902	0.0446595	0.0254697	BCL2/BECN1/FOXO3	3	0.57735
BP	GO:0043370	regulation of CD4-positive, alpha-beta T cell differentiation	3/198	50/18800	0.0156902	0.0446595	0.0254697	SMAD7/RIPK2/MALT1	3	0.57735
BP	GO:0046638	positive regulation of alpha-beta T cell differentiation	3/198	50/18800	0.0156902	0.0446595	0.0254697	RIPK2/MALT1/TGFBR2	3	1.73205
BP	GO:2000107	negative regulation of leukocyte apoptotic process	3/198	50/18800	0.0156902	0.0446595	0.0254697	FADD/BCL10/NOD2	3	-1.73205
BP	GO:0090068	positive regulation of cell cycle process	7/198	247/18800	0.0159483	0.0453588	0.0258685	DDX3X/TNF/AKT1/BECN1/ADAMTS1/UBE2E2/IL1A	7	1.13389
BP	GO:0007044	cell-substrate junction assembly	4/198	92/18800	0.016247	0.0460647	0.026271	BCL2/PTEN/CTTN/FN1	4	0
BP	GO:0022404	molting cycle process	4/198	92/18800	0.016247	0.0460647	0.026271	BCL2/TNF/RELA/TRADD	4	-2
BP	GO:0022405	hair cycle process	4/198	92/18800	0.016247	0.0460647	0.026271	BCL2/TNF/RELA/TRADD	4	-2
BP	GO:0060761	negative regulation of response to cytokine stimulus	4/198	92/18800	0.016247	0.0460647	0.026271	XIAP/CAV1/CARD8/MMP12	4	1
BP	GO:0014706	striated muscle tissue development	7/198	248/18800	0.0162701	0.0460945	0.026288	TGFBR1/BMP2/SMAD7/PTEN/TGFB1/BMPR1A/TGFBR2	7	-0.377964
BP	GO:0034341	response to interferon-gamma	5/198	140/18800	0.0163861	0.046387	0.0264549	TNF/CD40/CALCOCO2/TLR3/GSN	5	-1.34164
BP	GO:0006120	mitochondrial electron transport, NADH to ubiquinone	3/198	51/18800	0.0165442	0.0467098	0.026639	PARK7/PINK1/NDUFA4	3	-0.57735
BP	GO:0009409	response to cold	3/198	51/18800	0.0165442	0.0467098	0.026639	CASP8/HSP90AA1/FOXO1	3	-0.57735
BP	GO:0015872	dopamine transport	3/198	51/18800	0.0165442	0.0467098	0.026639	PARK7/PINK1/SYT11	3	-0.57735
BP	GO:0051271	negative regulation of cellular component movement	9/198	369/18800	0.0165513	0.0467098	0.026639	BCL2/TNF/RNF41/SMAD7/PTEN/AKT1/TGFB1/BMPR1A/FOXO3	9	-0.333333
BP	GO:0031645	negative regulation of nervous system process	2/198	19/18800	0.0167758	0.0468936	0.0267438	TNF/PTEN	2	-1.41421
BP	GO:0032930	positive regulation of superoxide anion generation	2/198	19/18800	0.0167758	0.0468936	0.0267438	PRKCD/TGFB1	2	0
BP	GO:0051546	keratinocyte migration	2/198	19/18800	0.0167758	0.0468936	0.0267438	PTEN/MMP9	2	0
BP	GO:0051797	regulation of hair follicle development	2/198	19/18800	0.0167758	0.0468936	0.0267438	TNF/TRADD	2	-1.41421
BP	GO:0060149	negative regulation of post-transcriptional gene silencing	2/198	19/18800	0.0167758	0.0468936	0.0267438	TNF/TGFB1	2	0
BP	GO:0060340	positive regulation of type I interferon-mediated signaling pathway	2/198	19/18800	0.0167758	0.0468936	0.0267438	FADD/MMP12	2	0
BP	GO:0060967	negative regulation of gene silencing by RNA	2/198	19/18800	0.0167758	0.0468936	0.0267438	TNF/TGFB1	2	0
BP	GO:0071800	podosome assembly	2/198	19/18800	0.0167758	0.0468936	0.0267438	TNF/GSN	2	0
BP	GO:0097709	connective tissue replacement	2/198	19/18800	0.0167758	0.0468936	0.0267438	TGFB1/IL1A	2	1.41421
BP	GO:1900369	negative regulation of post-transcriptional gene silencing by RNA	2/198	19/18800	0.0167758	0.0468936	0.0267438	TNF/TGFB1	2	0
BP	GO:1902894	negative regulation of miRNA transcription	2/198	19/18800	0.0167758	0.0468936	0.0267438	RELA/TGFB1	2	0
BP	GO:1903427	negative regulation of reactive oxygen species biosynthetic process	2/198	19/18800	0.0167758	0.0468936	0.0267438	PARK7/CFLAR	2	-1.41421
BP	GO:0032273	positive regulation of protein polymerization	4/198	93/18800	0.0168411	0.0468936	0.0267438	HSP90AA1/AMBRA1/PINK1/CTTN	4	-1
BP	GO:0034109	homotypic cell-cell adhesion	4/198	93/18800	0.0168411	0.0468936	0.0267438	COMP/PRKCD/HSPB1/FN1	4	-1
BP	GO:0060993	kidney morphogenesis	4/198	93/18800	0.0168411	0.0468936	0.0267438	BCL2/BMP2/MAGED1/PKD2	4	0
BP	GO:0098773	skin epidermis development	4/198	93/18800	0.0168411	0.0468936	0.0267438	BCL2/TNF/RELA/TRADD	4	-2
BP	GO:0035296	regulation of tube diameter	5/198	141/18800	0.0168478	0.0468936	0.0267438	COMP/TNF/BMPR2/CAV1/MMP2	5	-0.447214
BP	GO:0097746	blood vessel diameter maintenance	5/198	141/18800	0.0168478	0.0468936	0.0267438	COMP/TNF/BMPR2/CAV1/MMP2	5	-0.447214
BP	GO:0001935	endothelial cell proliferation	6/198	194/18800	0.0170014	0.0472851	0.026967	TNF/TGFBR1/BMP2/BMPR2/AKT1/CAV1	6	-0.816497
BP	GO:0051924	regulation of calcium ion transport	7/198	251/18800	0.0172633	0.0479769	0.0273616	BAK1/BCL2/SUMO1/CAV1/PKD2/VDAC1/BAX	7	0.377964
BP	GO:0035150	regulation of tube size	5/198	142/18800	0.017318	0.0480924	0.0274275	COMP/TNF/BMPR2/CAV1/MMP2	5	-0.447214
BP	GO:0031103	axon regeneration	3/198	52/18800	0.0174238	0.0482394	0.0275113	BCL2/PTEN/MMP2	3	-0.57735
BP	GO:0032206	positive regulation of telomere maintenance	3/198	52/18800	0.0174238	0.0482394	0.0275113	MAPK1/MAPK3/MAP2K7	3	0.57735
BP	GO:0065002	intracellular protein transmembrane transport	3/198	52/18800	0.0174238	0.0482394	0.0275113	TOMM20/TOMM40/TOMM7	3	1.73205
BP	GO:2000677	regulation of transcription regulatory region DNA binding	3/198	52/18800	0.0174238	0.0482394	0.0275113	TRAF6/PARK7/TGFB1	3	-0.57735
BP	GO:0061326	renal tubule development	4/198	94/18800	0.0174487	0.0482716	0.0275297	BCL2/BMP2/MAGED1/PKD2	4	0
BP	GO:0014033	neural crest cell differentiation	4/198	95/18800	0.0180698	0.049952	0.028488	MAPK1/BMPR1A/MAPK3/FN1	4	1
BP	GO:0051592	response to calcium ion	5/198	144/18800	0.0182844	0.0504486	0.0287712	BAD/PPIF/CAV1/PKD2/SYT11	5	1.34164
BP	GO:0032210	regulation of telomere maintenance via telomerase	3/198	53/18800	0.0183291	0.0504486	0.0287712	MAPK1/MAPK3/MAP2K7	3	0.57735
BP	GO:0051960	regulation of nervous system development	10/198	440/18800	0.0184879	0.0504486	0.0287712	TNF/BMP2/BMPR2/PTEN/TNFRSF1B/AKT1/TGFB1/BMPR1A/NGF/FN1	10	0
BP	GO:0002577	regulation of antigen processing and presentation	2/198	20/18800	0.0185121	0.0504486	0.0287712	NOD2/NOD1	2	0
BP	GO:0010523	negative regulation of calcium ion transport into cytosol	2/198	20/18800	0.0185121	0.0504486	0.0287712	BCL2/PKD2	2	0
BP	GO:0035313	wound healing, spreading of epidermal cells	2/198	20/18800	0.0185121	0.0504486	0.0287712	PTEN/MMP12	2	0
BP	GO:0036498	IRE1-mediated unfolded protein response	2/198	20/18800	0.0185121	0.0504486	0.0287712	BAK1/BAX	2	0
BP	GO:0043011	myeloid dendritic cell differentiation	2/198	20/18800	0.0185121	0.0504486	0.0287712	TRAF6/TGFBR2	2	0
BP	GO:0043555	regulation of translation in response to stress	2/198	20/18800	0.0185121	0.0504486	0.0287712	DDX3X/PPP1R15B	2	-1.41421
BP	GO:0045591	positive regulation of regulatory T cell differentiation	2/198	20/18800	0.0185121	0.0504486	0.0287712	AMBRA1/FOXO3	2	0
BP	GO:0046794	transport of virus	2/198	20/18800	0.0185121	0.0504486	0.0287712	EPS15/CAV1	2	0
BP	GO:0060716	labyrinthine layer blood vessel development	2/198	20/18800	0.0185121	0.0504486	0.0287712	MAPK1/AKT1	2	0
BP	GO:0098543	detection of other organism	2/198	20/18800	0.0185121	0.0504486	0.0287712	NOD2/NOD1	2	0
BP	GO:1900225	regulation of NLRP3 inflammasome complex assembly	2/198	20/18800	0.0185121	0.0504486	0.0287712	DDX3X/CARD8	2	0
BP	GO:1900424	regulation of defense response to bacterium	2/198	20/18800	0.0185121	0.0504486	0.0287712	NOD2/SYT11	2	0
BP	GO:1903206	negative regulation of hydrogen peroxide-induced cell death	2/198	20/18800	0.0185121	0.0504486	0.0287712	PARK7/PINK1	2	-1.41421
BP	GO:1903817	negative regulation of voltage-gated potassium channel activity	2/198	20/18800	0.0185121	0.0504486	0.0287712	SUMO1/CAV1	2	0
BP	GO:1904292	regulation of ERAD pathway	2/198	20/18800	0.0185121	0.0504486	0.0287712	CAV1/ATXN3	2	1.41421
BP	GO:2000010	positive regulation of protein localization to cell surface	2/198	20/18800	0.0185121	0.0504486	0.0287712	TNF/AKT1	2	0
BP	GO:1901988	negative regulation of cell cycle phase transition	7/198	255/18800	0.0186531	0.0507948	0.0289687	BCL2/FBXO7/PTEN/PIDD1/CRADD/PKD2/CASP2	7	0.377964
BP	GO:0003300	cardiac muscle hypertrophy	4/198	96/18800	0.0187045	0.0508589	0.0290052	TNFRSF1A/TNFRSF1B/BECN1/FOXO1	4	0
BP	GO:0060419	heart growth	4/198	96/18800	0.0187045	0.0508589	0.0290052	TGFBR1/PTEN/BMPR1A/TGFBR2	4	0
BP	GO:0072006	nephron development	5/198	145/18800	0.0187807	0.0510282	0.0291018	BCL2/BMP2/CFLAR/MAGED1/PKD2	5	-0.447214
BP	GO:0001763	morphogenesis of a branching structure	6/198	199/18800	0.0190189	0.0515603	0.0294052	BCL2/TNF/BMP2/MAGED1/PKD2/TGFBR2	6	0
BP	GO:0022408	negative regulation of cell-cell adhesion	6/198	199/18800	0.0190189	0.0515603	0.0294052	BMP2/PRKCD/SMAD7/CASP3/AKT1/TGFB1	6	-0.816497
BP	GO:0071674	mononuclear cell migration	6/198	199/18800	0.0190189	0.0515603	0.0294052	FADD/RIPK3/TNF/MAPK1/AKT1/MAPK3	6	-0.816497
BP	GO:0002067	glandular epithelial cell differentiation	3/198	54/18800	0.0192601	0.0519823	0.0296459	BMP2/BAD/AKT1	3	-0.57735
BP	GO:0006968	cellular defense response	3/198	54/18800	0.0192601	0.0519823	0.0296459	BCL10/RELA/BECN1	3	-0.57735
BP	GO:0014888	striated muscle adaptation	3/198	54/18800	0.0192601	0.0519823	0.0296459	CFLAR/GSN/FOXO1	3	0.57735
BP	GO:0016925	protein sumoylation	3/198	54/18800	0.0192601	0.0519823	0.0296459	RELA/SUMO1/PARK7	3	-1.73205
BP	GO:0045661	regulation of myoblast differentiation	3/198	54/18800	0.0192601	0.0519823	0.0296459	MAP3K5/TNF/TGFB1	3	-0.57735
BP	GO:0061900	glial cell activation	3/198	54/18800	0.0192601	0.0519823	0.0296459	TNF/TLR3/SYT11	3	-0.57735
BP	GO:0046700	heterocycle catabolic process	10/198	443/18800	0.01928	0.0519975	0.0296546	VCP/PRKCD/TNFRSF1B/AKT1/TARDBP/TRAF2/APAF1/LRPPRC/TRAF5/BAX	10	1.26491
BP	GO:0060349	bone morphogenesis	4/198	98/18800	0.020015	0.0539002	0.0307397	COMP/BMPR2/TGFBR2/MMP13	4	0
BP	GO:0150115	cell-substrate junction organization	4/198	98/18800	0.020015	0.0539002	0.0307397	BCL2/PTEN/CTTN/FN1	4	0
BP	GO:0001706	endoderm formation	3/198	55/18800	0.0202168	0.054243	0.0309352	MMP9/FN1/MMP2	3	1.73205
BP	GO:0002707	negative regulation of lymphocyte mediated immunity	3/198	55/18800	0.0202168	0.054243	0.0309352	GFER/SMAD7/NOD2	3	-1.73205
BP	GO:0097352	autophagosome maturation	3/198	55/18800	0.0202168	0.054243	0.0309352	VCP/CALCOCO2/BECN1	3	-0.57735
BP	GO:1902991	regulation of amyloid precursor protein catabolic process	3/198	55/18800	0.0202168	0.054243	0.0309352	TNF/RELA/CASP3	3	-1.73205
BP	GO:0003085	negative regulation of systemic arterial blood pressure	2/198	21/18800	0.0203207	0.054243	0.0309352	TNF/BMPR2	2	-1.41421
BP	GO:0030220	platelet formation	2/198	21/18800	0.0203207	0.054243	0.0309352	CASP9/CASP3	2	-1.41421
BP	GO:0032069	regulation of nuclease activity	2/198	21/18800	0.0203207	0.054243	0.0309352	PRKCD/AKT1	2	0
BP	GO:0038083	peptidyl-tyrosine autophosphorylation	2/198	21/18800	0.0203207	0.054243	0.0309352	MAPK3/CAV1	2	1.41421
BP	GO:0070262	peptidyl-serine dephosphorylation	2/198	21/18800	0.0203207	0.054243	0.0309352	PPP1R15B/PPP2CA	2	0
BP	GO:0071498	cellular response to fluid shear stress	2/198	21/18800	0.0203207	0.054243	0.0309352	PKD2/MMP2	2	1.41421
BP	GO:0071636	positive regulation of transforming growth factor beta production	2/198	21/18800	0.0203207	0.054243	0.0309352	LUM/BMPR1A	2	0
BP	GO:0072111	cell proliferation involved in kidney development	2/198	21/18800	0.0203207	0.054243	0.0309352	BMP2/CFLAR	2	-1.41421
BP	GO:0014897	striated muscle hypertrophy	4/198	99/18800	0.0206909	0.055191	0.0314758	TNFRSF1A/TNFRSF1B/BECN1/FOXO1	4	0
BP	GO:0002064	epithelial cell development	6/198	203/18800	0.0207464	0.0552986	0.0315372	TNF/TNFRSF1A/IKBKB/BAD/AKT1/IL1A	6	-0.816497
BP	GO:0044270	cellular nitrogen compound catabolic process	10/198	449/18800	0.0209385	0.0557697	0.0318059	VCP/PRKCD/TNFRSF1B/AKT1/TARDBP/TRAF2/APAF1/LRPPRC/TRAF5/BAX	10	1.26491
BP	GO:0034205	amyloid-beta formation	3/198	56/18800	0.0211994	0.0563823	0.0321552	TNF/RELA/CASP3	3	-1.73205
BP	GO:0061756	leukocyte adhesion to vascular endothelial cell	3/198	56/18800	0.0211994	0.0563823	0.0321552	TNF/TRAF6/RELA	3	-1.73205
BP	GO:0014013	regulation of gliogenesis	4/198	100/18800	0.0213808	0.0567379	0.0323581	TNF/BMP2/TNFRSF1B/TGFB1	4	-1
BP	GO:0031341	regulation of cell killing	4/198	100/18800	0.0213808	0.0567379	0.0323581	FADD/RIPK3/GFER/BCL2L1	4	-2
BP	GO:1901992	positive regulation of mitotic cell cycle phase transition	4/198	100/18800	0.0213808	0.0567379	0.0323581	DDX3X/AKT1/ADAMTS1/UBE2E2	4	1
BP	GO:0043535	regulation of blood vessel endothelial cell migration	5/198	150/18800	0.0213953	0.0567379	0.0323581	TNF/CD40/HSPB1/AKT1/TGFB1	5	-0.447214
BP	GO:0044703	multi-organism reproductive process	6/198	205/18800	0.0216489	0.0573271	0.0326941	BCL2/BMPR2/AKT1/MMP9/TGFBR2/MMP2	6	0.816497
BP	GO:0045216	cell-cell junction organization	6/198	205/18800	0.0216489	0.0573271	0.0326941	TNF/TGFBR1/IKBKB/SMAD7/TGFB1/CAV1	6	-0.816497
BP	GO:0042692	muscle cell differentiation	9/198	387/18800	0.0217743	0.0576175	0.0328597	COMP/BCL2/BMP2/CFLAR/BMPR2/CASP3/AKT1/TGFB1/BMPR1A	9	-1
BP	GO:0014896	muscle hypertrophy	4/198	101/18800	0.0220846	0.057759	0.0329404	TNFRSF1A/TNFRSF1B/BECN1/FOXO1	4	0
BP	GO:0021884	forebrain neuron development	2/198	22/18800	0.0221999	0.057759	0.0329404	UBB/UQCRQ	2	0
BP	GO:0023019	signal transduction involved in regulation of gene expression	2/198	22/18800	0.0221999	0.057759	0.0329404	TRAF2/TRAF5	2	1.41421
BP	GO:0032928	regulation of superoxide anion generation	2/198	22/18800	0.0221999	0.057759	0.0329404	PRKCD/TGFB1	2	0
BP	GO:0036344	platelet morphogenesis	2/198	22/18800	0.0221999	0.057759	0.0329404	CASP9/CASP3	2	-1.41421
BP	GO:0044346	fibroblast apoptotic process	2/198	22/18800	0.0221999	0.057759	0.0329404	BAK1/BID	2	-1.41421
BP	GO:0044546	NLRP3 inflammasome complex assembly	2/198	22/18800	0.0221999	0.057759	0.0329404	DDX3X/CARD8	2	0
BP	GO:0045624	positive regulation of T-helper cell differentiation	2/198	22/18800	0.0221999	0.057759	0.0329404	RIPK2/MALT1	2	1.41421
BP	GO:0046823	negative regulation of nucleocytoplasmic transport	2/198	22/18800	0.0221999	0.057759	0.0329404	SUMO1/PARK7	2	-1.41421
BP	GO:0051444	negative regulation of ubiquitin-protein transferase activity	2/198	22/18800	0.0221999	0.057759	0.0329404	PARK7/SMAD7	2	-1.41421
BP	GO:0061081	positive regulation of myeloid leukocyte cytokine production involved in immune response	2/198	22/18800	0.0221999	0.057759	0.0329404	BCL10/TICAM1	2	-1.41421
BP	GO:0070269	pyroptosis	2/198	22/18800	0.0221999	0.057759	0.0329404	CASP8/CASP6	2	0
BP	GO:0072574	hepatocyte proliferation	2/198	22/18800	0.0221999	0.057759	0.0329404	TNF/CFLAR	2	-1.41421
BP	GO:0072575	epithelial cell proliferation involved in liver morphogenesis	2/198	22/18800	0.0221999	0.057759	0.0329404	TNF/CFLAR	2	-1.41421
BP	GO:1901032	negative regulation of response to reactive oxygen species	2/198	22/18800	0.0221999	0.057759	0.0329404	PARK7/PINK1	2	-1.41421
BP	GO:1903428	positive regulation of reactive oxygen species biosynthetic process	2/198	22/18800	0.0221999	0.057759	0.0329404	PARK7/FOXO3	2	0
BP	GO:2000725	regulation of cardiac muscle cell differentiation	2/198	22/18800	0.0221999	0.057759	0.0329404	BMP2/TGFB1	2	0
BP	GO:2000810	regulation of bicellular tight junction assembly	2/198	22/18800	0.0221999	0.057759	0.0329404	TNF/IKBKB	2	-1.41421
BP	GO:0006754	ATP biosynthetic process	3/198	57/18800	0.0222077	0.057759	0.0329404	VCP/PINK1/TGFB1	3	-0.57735
BP	GO:0007566	embryo implantation	3/198	57/18800	0.0222077	0.057759	0.0329404	MMP9/TGFBR2/MMP2	3	1.73205
BP	GO:0038066	p38MAPK cascade	3/198	57/18800	0.0222077	0.057759	0.0329404	MAP3K5/BMP2/MAP3K7	3	-0.57735
BP	GO:0043551	regulation of phosphatidylinositol 3-kinase activity	3/198	57/18800	0.0222077	0.057759	0.0329404	AMBRA1/NOD2/TGFB1	3	-0.57735
BP	GO:0048255	mRNA stabilization	3/198	57/18800	0.0222077	0.057759	0.0329404	TARDBP/TRAF2/TRAF5	3	1.73205
BP	GO:0098900	regulation of action potential	3/198	57/18800	0.0222077	0.057759	0.0329404	TNF/SUMO1/CAV1	3	-0.57735
BP	GO:0035710	CD4-positive, alpha-beta T cell activation	4/198	102/18800	0.0228024	0.0592636	0.0337985	SMAD7/RIPK2/MALT1/TGFBR2	4	1
BP	GO:0035051	cardiocyte differentiation	5/198	153/18800	0.0230724	0.0598799	0.03415	BMP2/MAPK1/TGFB1/BMPR1A/MAPK3	5	0.447214
BP	GO:0051147	regulation of muscle cell differentiation	5/198	153/18800	0.0230724	0.0598799	0.03415	BCL2/BMP2/BMPR2/TGFB1/BMPR1A	5	-0.447214
BP	GO:0050732	negative regulation of peptidyl-tyrosine phosphorylation	3/198	58/18800	0.0232418	0.0602767	0.0343763	PRKCD/CAV1/PPP2CA	3	0.57735
BP	GO:1901796	regulation of signal transduction by p53 class mediator	4/198	103/18800	0.0235343	0.0609487	0.0347595	BCL2/UBB/AKT1/USP2	4	0
BP	GO:1905477	positive regulation of protein localization to membrane	4/198	103/18800	0.0235343	0.0609487	0.0347595	SQSTM1/TNF/AKT1/FIS1	4	0
BP	GO:0097530	granulocyte migration	5/198	154/18800	0.0236498	0.0612044	0.0349053	NOD2/MAPK1/MAPK3/DNM1L/IL1A	5	0.447214
BP	GO:0032970	regulation of actin filament-based process	9/198	393/18800	0.0237532	0.0614285	0.0350331	TGFBR1/PRKCD/SUMO1/ARHGDIA/CAV1/CTTN/GSN/HAX1/IL1A	9	0.333333
BP	GO:0002053	positive regulation of mesenchymal cell proliferation	2/198	23/18800	0.024148	0.0620099	0.0353647	BMPR1A/TGFBR2	2	1.41421
BP	GO:0003323	type B pancreatic cell development	2/198	23/18800	0.024148	0.0620099	0.0353647	BAD/AKT1	2	0
BP	GO:0008211	glucocorticoid metabolic process	2/198	23/18800	0.024148	0.0620099	0.0353647	BMP2/STUB1	2	-1.41421
BP	GO:0010893	positive regulation of steroid biosynthetic process	2/198	23/18800	0.024148	0.0620099	0.0353647	TNF/IL1A	2	0
BP	GO:0046641	positive regulation of alpha-beta T cell proliferation	2/198	23/18800	0.024148	0.0620099	0.0353647	RIPK2/TGFBR2	2	1.41421
BP	GO:0071359	cellular response to dsRNA	2/198	23/18800	0.024148	0.0620099	0.0353647	TLR3/CAV1	2	0
BP	GO:0072576	liver morphogenesis	2/198	23/18800	0.024148	0.0620099	0.0353647	TNF/CFLAR	2	-1.41421
BP	GO:0097150	neuronal stem cell population maintenance	2/198	23/18800	0.024148	0.0620099	0.0353647	FOXO3/FOXO1	2	1.41421
BP	GO:0140632	inflammasome complex assembly	2/198	23/18800	0.024148	0.0620099	0.0353647	DDX3X/CARD8	2	0
BP	GO:2001169	regulation of ATP biosynthetic process	2/198	23/18800	0.024148	0.0620099	0.0353647	VCP/PINK1	2	-1.41421
BP	GO:1905952	regulation of lipid localization	5/198	155/18800	0.0242365	0.0620986	0.0354153	TNF/PRKCD/AKT1/FIS1/IL1A	5	0.447214
BP	GO:0019218	regulation of steroid metabolic process	4/198	104/18800	0.0242804	0.0620986	0.0354153	TNF/BMP2/STUB1/IL1A	4	-1
BP	GO:0050830	defense response to Gram-positive bacterium	4/198	104/18800	0.0242804	0.0620986	0.0354153	TNF/NOD2/RIPK2/NOD1	4	0
BP	GO:0031102	neuron projection regeneration	3/198	59/18800	0.0243017	0.0620986	0.0354153	BCL2/PTEN/MMP2	3	-0.57735
BP	GO:0043666	regulation of phosphoprotein phosphatase activity	3/198	59/18800	0.0243017	0.0620986	0.0354153	TNF/IKBKB/PPP1R15B	3	-1.73205
BP	GO:0045599	negative regulation of fat cell differentiation	3/198	59/18800	0.0243017	0.0620986	0.0354153	TNF/TGFB1/FOXO1	3	0.57735
BP	GO:2000351	regulation of endothelial cell apoptotic process	3/198	59/18800	0.0243017	0.0620986	0.0354153	TNF/CD40/FOXO3	3	-0.57735
BP	GO:0051235	maintenance of location	8/198	331/18800	0.0243442	0.0621637	0.0354524	TNF/PARK7/PINK1/AKT1/CAV1/PKD2/GSN/BAX	8	0.707107
BP	GO:0051962	positive regulation of nervous system development	7/198	270/18800	0.0245651	0.0626838	0.0357491	TNF/BMP2/BMPR2/TNFRSF1B/TGFB1/NGF/FN1	7	-0.377964
BP	GO:0040013	negative regulation of locomotion	9/198	396/18800	0.0247895	0.0632123	0.0360505	BCL2/TNF/RNF41/SMAD7/PTEN/AKT1/TGFB1/BMPR1A/FOXO3	9	-0.333333
BP	GO:0046634	regulation of alpha-beta T cell activation	4/198	105/18800	0.0250406	0.063808	0.0363902	SMAD7/RIPK2/MALT1/TGFBR2	4	1
BP	GO:0043407	negative regulation of MAP kinase activity	3/198	60/18800	0.0253874	0.0645564	0.036817	BMP2/PRKCD/CAV1	3	-0.57735
BP	GO:0046824	positive regulation of nucleocytoplasmic transport	3/198	60/18800	0.0253874	0.0645564	0.036817	PRKCD/TARDBP/TGFB1	3	0.57735
BP	GO:1903078	positive regulation of protein localization to plasma membrane	3/198	60/18800	0.0253874	0.0645564	0.036817	SQSTM1/TNF/AKT1	3	-0.57735
BP	GO:0001894	tissue homeostasis	7/198	272/18800	0.0254403	0.064646	0.0368681	COMP/BCL2/TRAF6/HSPB1/NOD2/PPARGC1B/BAX	7	-1.13389
BP	GO:0034764	positive regulation of transmembrane transport	6/198	213/18800	0.0255237	0.0647676	0.0369375	SUMO1/PINK1/AKT1/PKD2/BAX/NDUFA4	6	0.816497
BP	GO:0044706	multi-multicellular organism process	6/198	213/18800	0.0255237	0.0647676	0.0369375	BCL2/BMPR2/AKT1/MMP9/TGFBR2/MMP2	6	0.816497
BP	GO:0032414	positive regulation of ion transmembrane transporter activity	4/198	106/18800	0.025815	0.065416	0.0373073	SUMO1/PINK1/PKD2/NDUFA4	4	0
BP	GO:0042116	macrophage activation	4/198	106/18800	0.025815	0.065416	0.0373073	TICAM1/TNF/TLR3/SYT11	4	-1
BP	GO:0007292	female gamete generation	5/198	158/18800	0.0260525	0.0656154	0.037421	BCL2/UBB/ADAMTS1/FOXO3/MMP2	5	0.447214
BP	GO:0043488	regulation of mRNA stability	5/198	158/18800	0.0260525	0.0656154	0.037421	PRKCD/AKT1/TARDBP/TRAF2/TRAF5	5	1.34164
BP	GO:0046631	alpha-beta T cell activation	5/198	158/18800	0.0260525	0.0656154	0.037421	BCL2/SMAD7/RIPK2/MALT1/TGFBR2	5	0.447214
BP	GO:0002755	MyD88-dependent toll-like receptor signaling pathway	2/198	24/18800	0.0261634	0.0656154	0.037421	TRAF6/MAP3K7	2	0
BP	GO:0002922	positive regulation of humoral immune response	2/198	24/18800	0.0261634	0.0656154	0.037421	TNF/NOD2	2	-1.41421
BP	GO:0032740	positive regulation of interleukin-17 production	2/198	24/18800	0.0261634	0.0656154	0.037421	NOD2/TGFB1	2	0
BP	GO:0042026	protein refolding	2/198	24/18800	0.0261634	0.0656154	0.037421	HSP90AA1/HSPB1	2	-1.41421
BP	GO:0048011	neurotrophin TRK receptor signaling pathway	2/198	24/18800	0.0261634	0.0656154	0.037421	CASP3/RAF1	2	0
BP	GO:0051043	regulation of membrane protein ectodomain proteolysis	2/198	24/18800	0.0261634	0.0656154	0.037421	TNF/TNFRSF1B	2	-1.41421
BP	GO:0070841	inclusion body assembly	2/198	24/18800	0.0261634	0.0656154	0.037421	VCP/HDAC6	2	-1.41421
BP	GO:1901522	positive regulation of transcription from RNA polymerase II promoter involved in cellular response to chemical stimulus	2/198	24/18800	0.0261634	0.0656154	0.037421	BMP2/RELA	2	-1.41421
BP	GO:1904666	regulation of ubiquitin protein ligase activity	2/198	24/18800	0.0261634	0.0656154	0.037421	PTEN/DNM1L	2	0
BP	GO:2000209	regulation of anoikis	2/198	24/18800	0.0261634	0.0656154	0.037421	BCL2/CAV1	2	0
BP	GO:2000353	positive regulation of endothelial cell apoptotic process	2/198	24/18800	0.0261634	0.0656154	0.037421	CD40/FOXO3	2	0
BP	GO:2000637	positive regulation of miRNA-mediated gene silencing	2/198	24/18800	0.0261634	0.0656154	0.037421	RIPK1/TGFB1	2	1.41421
BP	GO:0019439	aromatic compound catabolic process	10/198	466/18800	0.0262022	0.0656675	0.0374507	VCP/PRKCD/TNFRSF1B/AKT1/TARDBP/TRAF2/APAF1/LRPPRC/TRAF5/BAX	10	1.26491
BP	GO:0032387	negative regulation of intracellular transport	3/198	61/18800	0.0264988	0.0661835	0.0377449	UBE2G2/SUMO1/PARK7	3	-1.73205
BP	GO:0043112	receptor metabolic process	3/198	61/18800	0.0264988	0.0661835	0.0377449	BECN1/TGFB1/OPTN	3	1.73205
BP	GO:0050994	regulation of lipid catabolic process	3/198	61/18800	0.0264988	0.0661835	0.0377449	TNF/PRKCD/AKT1	3	-0.57735
BP	GO:1903409	reactive oxygen species biosynthetic process	3/198	61/18800	0.0264988	0.0661835	0.0377449	PARK7/CFLAR/FOXO3	3	-0.57735
BP	GO:1904356	regulation of telomere maintenance via telomere lengthening	3/198	61/18800	0.0264988	0.0661835	0.0377449	MAPK1/MAPK3/MAP2K7	3	0.57735
BP	GO:0000045	autophagosome assembly	4/198	107/18800	0.0266038	0.0663096	0.0378169	AMBRA1/MFN2/PINK1/BECN1	4	-1
BP	GO:0019882	antigen processing and presentation	4/198	107/18800	0.0266038	0.0663096	0.0378169	IKBKB/TRAF6/NOD2/NOD1	4	-1
BP	GO:0030004	cellular monovalent inorganic cation homeostasis	4/198	107/18800	0.0266038	0.0663096	0.0378169	BCL2/MAPK1/MAPK3/IL1A	4	0
BP	GO:0016064	immunoglobulin mediated immune response	6/198	216/18800	0.0270886	0.0674718	0.0384797	BCL10/TNF/CD40/PRKCD/NOD2/TGFB1	6	-1.63299
BP	GO:0002262	myeloid cell homeostasis	5/198	160/18800	0.0273103	0.0679776	0.0387682	BAK1/CASP3/SLC25A5/FOXO3/BAX	5	0.447214
BP	GO:0010959	regulation of metal ion transport	9/198	403/18800	0.027332	0.0679854	0.0387726	BAK1/BCL2/SUMO1/AKT1/CAV1/PKD2/COMMD1/VDAC1/BAX	9	1
BP	GO:0061387	regulation of extent of cell growth	4/198	108/18800	0.0274069	0.0681251	0.0388523	BMPR2/NGF/CTTN/FN1	4	1
BP	GO:0035904	aorta development	3/198	62/18800	0.0276359	0.0686477	0.0391503	TAB1/BMPR1A/PKD2	3	0.57735
BP	GO:0043434	response to peptide hormone	9/198	404/18800	0.0277097	0.0687842	0.0392282	ESRRA/CAT/RELA/PRKCD/CFLAR/AKT1/CAV1/CYC1/FOXO1	9	-0.333333
BP	GO:0050806	positive regulation of synaptic transmission	5/198	161/18800	0.0279534	0.069342	0.0395463	SQSTM1/TNF/PTEN/MAPK1/PINK1	5	-2.23607
BP	GO:0006929	substrate-dependent cell migration	2/198	25/18800	0.0282445	0.0694036	0.0395814	CTTN/FN1	2	1.41421
BP	GO:0030810	positive regulation of nucleotide biosynthetic process	2/198	25/18800	0.0282445	0.0694036	0.0395814	VCP/PINK1	2	-1.41421
BP	GO:0031579	membrane raft organization	2/198	25/18800	0.0282445	0.0694036	0.0395814	CAV1/GSN	2	1.41421
BP	GO:0033233	regulation of protein sumoylation	2/198	25/18800	0.0282445	0.0694036	0.0395814	RELA/PARK7	2	-1.41421
BP	GO:0045662	negative regulation of myoblast differentiation	2/198	25/18800	0.0282445	0.0694036	0.0395814	TNF/TGFB1	2	0
BP	GO:0046039	GTP metabolic process	2/198	25/18800	0.0282445	0.0694036	0.0395814	MFN1/OPA1	2	1.41421
BP	GO:0048668	collateral sprouting	2/198	25/18800	0.0282445	0.0694036	0.0395814	HDAC6/NGF	2	0
BP	GO:0060148	positive regulation of post-transcriptional gene silencing	2/198	25/18800	0.0282445	0.0694036	0.0395814	RIPK1/TGFB1	2	1.41421
BP	GO:0098581	detection of external biotic stimulus	2/198	25/18800	0.0282445	0.0694036	0.0395814	NOD2/NOD1	2	0
BP	GO:1900370	positive regulation of post-transcriptional gene silencing by RNA	2/198	25/18800	0.0282445	0.0694036	0.0395814	RIPK1/TGFB1	2	1.41421
BP	GO:1900373	positive regulation of purine nucleotide biosynthetic process	2/198	25/18800	0.0282445	0.0694036	0.0395814	VCP/PINK1	2	-1.41421
BP	GO:1903077	negative regulation of protein localization to plasma membrane	2/198	25/18800	0.0282445	0.0694036	0.0395814	BCL2L1/TGFB1	2	0
BP	GO:1903959	regulation of anion transmembrane transport	2/198	25/18800	0.0282445	0.0694036	0.0395814	TNF/RIPK1	2	0
BP	GO:1905523	positive regulation of macrophage migration	2/198	25/18800	0.0282445	0.0694036	0.0395814	MAPK1/MAPK3	2	0
BP	GO:0019724	B cell mediated immunity	6/198	219/18800	0.0287159	0.0705142	0.0402148	BCL10/TNF/CD40/PRKCD/NOD2/TGFB1	6	-1.63299
BP	GO:0010573	vascular endothelial growth factor production	3/198	63/18800	0.0287987	0.0706227	0.0402767	TNF/TGFB1/IL1A	3	0.57735
BP	GO:2000401	regulation of lymphocyte migration	3/198	63/18800	0.0287987	0.0706227	0.0402767	FADD/RIPK3/AKT1	3	-0.57735
BP	GO:0006401	RNA catabolic process	7/198	280/18800	0.0291549	0.071448	0.0407473	PRKCD/TNFRSF1B/AKT1/TARDBP/TRAF2/LRPPRC/TRAF5	7	1.13389
BP	GO:0034767	positive regulation of ion transmembrane transport	5/198	163/18800	0.0292684	0.0716782	0.0408786	SUMO1/PINK1/PKD2/BAX/NDUFA4	5	0.447214
BP	GO:0051146	striated muscle cell differentiation	7/198	281/18800	0.0296436	0.0725484	0.0413749	BCL2/BMP2/CFLAR/CASP3/AKT1/TGFB1/BMPR1A	7	-0.377964
BP	GO:0007596	blood coagulation	6/198	221/18800	0.0298358	0.0729373	0.0415967	COMP/CD40/PRKCD/HSPB1/CAV1/FN1	6	-0.816497
BP	GO:0001938	positive regulation of endothelial cell proliferation	4/198	111/18800	0.0299025	0.0729373	0.0415967	TGFBR1/BMP2/BMPR2/AKT1	4	-1
BP	GO:0031532	actin cytoskeleton reorganization	4/198	111/18800	0.0299025	0.0729373	0.0415967	ARHGDIA/CTTN/GSN/HAX1	4	1
BP	GO:0072009	nephron epithelium development	4/198	111/18800	0.0299025	0.0729373	0.0415967	BCL2/BMP2/MAGED1/PKD2	4	0
BP	GO:1905037	autophagosome organization	4/198	111/18800	0.0299025	0.0729373	0.0415967	AMBRA1/MFN2/PINK1/BECN1	4	-1
BP	GO:0001885	endothelial cell development	3/198	64/18800	0.0299872	0.0729488	0.0416033	TNF/TNFRSF1A/IKBKB	3	-1.73205
BP	GO:0009620	response to fungus	3/198	64/18800	0.0299872	0.0729488	0.0416033	BAK1/BCL10/MALT1	3	-0.57735
BP	GO:0019229	regulation of vasoconstriction	3/198	64/18800	0.0299872	0.0729488	0.0416033	BMPR2/CAV1/MMP2	3	0.57735
BP	GO:0098930	axonal transport	3/198	64/18800	0.0299872	0.0729488	0.0416033	HDAC6/HSPB1/OPA1	3	-0.57735
BP	GO:0000737	DNA catabolic process, endonucleolytic	2/198	26/18800	0.0303897	0.0734871	0.0419103	APAF1/BAX	2	1.41421
BP	GO:0031664	regulation of lipopolysaccharide-mediated signaling pathway	2/198	26/18800	0.0303897	0.0734871	0.0419103	TRAF6/CARD8	2	0
BP	GO:0032515	negative regulation of phosphoprotein phosphatase activity	2/198	26/18800	0.0303897	0.0734871	0.0419103	TNF/IKBKB	2	-1.41421
BP	GO:0033598	mammary gland epithelial cell proliferation	2/198	26/18800	0.0303897	0.0734871	0.0419103	MAPK1/BAX	2	0
BP	GO:0048641	regulation of skeletal muscle tissue development	2/198	26/18800	0.0303897	0.0734871	0.0419103	BCL2/TGFB1	2	0
BP	GO:0050995	negative regulation of lipid catabolic process	2/198	26/18800	0.0303897	0.0734871	0.0419103	TNF/AKT1	2	0
BP	GO:0060740	prostate gland epithelium morphogenesis	2/198	26/18800	0.0303897	0.0734871	0.0419103	MMP2/TNC	2	1.41421
BP	GO:0071549	cellular response to dexamethasone stimulus	2/198	26/18800	0.0303897	0.0734871	0.0419103	CASP9/CFLAR	2	-1.41421
BP	GO:2000316	regulation of T-helper 17 type immune response	2/198	26/18800	0.0303897	0.0734871	0.0419103	SMAD7/MALT1	2	0
BP	GO:0061564	axon development	10/198	479/18800	0.0308245	0.074489	0.0424817	BCL2/HSP90AA1/HDAC6/BMPR2/PTEN/CASP3/NGF/CTTN/FN1/MMP2	10	-0.632456
BP	GO:0042093	T-helper cell differentiation	3/198	65/18800	0.0312012	0.0752997	0.042944	SMAD7/RIPK2/MALT1	3	0.57735
BP	GO:0070613	regulation of protein processing	3/198	65/18800	0.0312012	0.0752997	0.042944	XIAP/CARD8/GSN	3	0.57735
BP	GO:0002526	acute inflammatory response	4/198	113/18800	0.0316386	0.0762544	0.0434885	TNF/PARK7/IL1A/FN1	4	0
BP	GO:0002832	negative regulation of response to biotic stimulus	4/198	113/18800	0.0316386	0.0762544	0.0434885	GFER/CARD8/HTRA1/MMP12	4	1
BP	GO:0009306	protein secretion	8/198	350/18800	0.032391	0.0778455	0.0443959	COMP/TNF/BAD/PARK7/RAF1/TGFB1/DNM1L/IL1A	8	0
BP	GO:0043489	RNA stabilization	3/198	66/18800	0.0324407	0.0778455	0.0443959	TARDBP/TRAF2/TRAF5	3	1.73205
BP	GO:1902373	negative regulation of mRNA catabolic process	3/198	66/18800	0.0324407	0.0778455	0.0443959	TARDBP/TRAF2/TRAF5	3	1.73205
BP	GO:0042303	molting cycle	4/198	114/18800	0.0325284	0.0778455	0.0443959	BCL2/TNF/RELA/TRADD	4	-2
BP	GO:0042633	hair cycle	4/198	114/18800	0.0325284	0.0778455	0.0443959	BCL2/TNF/RELA/TRADD	4	-2
BP	GO:0001963	synaptic transmission, dopaminergic	2/198	27/18800	0.0325974	0.0778455	0.0443959	PARK7/PINK1	2	-1.41421
BP	GO:0002675	positive regulation of acute inflammatory response	2/198	27/18800	0.0325974	0.0778455	0.0443959	TNF/PARK7	2	-1.41421
BP	GO:0002710	negative regulation of T cell mediated immunity	2/198	27/18800	0.0325974	0.0778455	0.0443959	SMAD7/NOD2	2	-1.41421
BP	GO:0009651	response to salt stress	2/198	27/18800	0.0325974	0.0778455	0.0443959	TNF/BAX	2	0
BP	GO:0010758	regulation of macrophage chemotaxis	2/198	27/18800	0.0325974	0.0778455	0.0443959	MAPK1/MAPK3	2	0
BP	GO:0046426	negative regulation of receptor signaling pathway via JAK-STAT	2/198	27/18800	0.0325974	0.0778455	0.0443959	CAV1/PPP2CA	2	1.41421
BP	GO:0051953	negative regulation of amine transport	2/198	27/18800	0.0325974	0.0778455	0.0443959	TNF/SYT11	2	0
BP	GO:1902883	negative regulation of response to oxidative stress	2/198	27/18800	0.0325974	0.0778455	0.0443959	PARK7/PINK1	2	-1.41421
BP	GO:1904376	negative regulation of protein localization to cell periphery	2/198	27/18800	0.0325974	0.0778455	0.0443959	BCL2L1/TGFB1	2	0
BP	GO:0050817	coagulation	6/198	226/18800	0.0327602	0.0781831	0.0445884	COMP/CD40/PRKCD/HSPB1/CAV1/FN1	6	-0.816497
BP	GO:0032535	regulation of cellular component size	8/198	351/18800	0.0328593	0.0783173	0.0446649	PRKCD/BMPR2/PTEN/NGF/CTTN/GSN/HAX1/FN1	8	0.707107
BP	GO:0035592	establishment of protein localization to extracellular region	8/198	351/18800	0.0328593	0.0783173	0.0446649	COMP/TNF/BAD/PARK7/RAF1/TGFB1/DNM1L/IL1A	8	0
BP	GO:0007599	hemostasis	6/198	227/18800	0.0333666	0.0794744	0.0453249	COMP/CD40/PRKCD/HSPB1/CAV1/FN1	6	-0.816497
BP	GO:0021543	pallium development	5/198	169/18800	0.0334457	0.0796108	0.0454026	BAD/PTEN/CASP3/BAX/UQCRQ	5	-0.447214
BP	GO:0002294	CD4-positive, alpha-beta T cell differentiation involved in immune response	3/198	67/18800	0.0337057	0.0799687	0.0456068	SMAD7/RIPK2/MALT1	3	0.57735
BP	GO:0002704	negative regulation of leukocyte mediated immunity	3/198	67/18800	0.0337057	0.0799687	0.0456068	GFER/SMAD7/NOD2	3	-1.73205
BP	GO:0042531	positive regulation of tyrosine phosphorylation of STAT protein	3/198	67/18800	0.0337057	0.0799687	0.0456068	TNF/TNFRSF1A/CD40	3	-1.73205
BP	GO:0051926	negative regulation of calcium ion transport	3/198	67/18800	0.0337057	0.0799687	0.0456068	BCL2/PKD2/VDAC1	3	0.57735
BP	GO:1904377	positive regulation of protein localization to cell periphery	3/198	67/18800	0.0337057	0.0799687	0.0456068	SQSTM1/TNF/AKT1	3	-0.57735
BP	GO:1904892	regulation of receptor signaling pathway via STAT	4/198	116/18800	0.0343518	0.0814488	0.0464509	TNF/TGFB1/CAV1/PPP2CA	4	1
BP	GO:0010804	negative regulation of tumor necrosis factor-mediated signaling pathway	2/198	28/18800	0.0348661	0.0817543	0.0466251	XIAP/CARD8	2	0
BP	GO:0010955	negative regulation of protein processing	2/198	28/18800	0.0348661	0.0817543	0.0466251	XIAP/CARD8	2	0
BP	GO:0032801	receptor catabolic process	2/198	28/18800	0.0348661	0.0817543	0.0466251	BECN1/TGFB1	2	1.41421
BP	GO:0033688	regulation of osteoblast proliferation	2/198	28/18800	0.0348661	0.0817543	0.0466251	BCL2/BMP2	2	-1.41421
BP	GO:0042634	regulation of hair cycle	2/198	28/18800	0.0348661	0.0817543	0.0466251	TNF/TRADD	2	-1.41421
BP	GO:0045830	positive regulation of isotype switching	2/198	28/18800	0.0348661	0.0817543	0.0466251	CD40/TGFB1	2	0
BP	GO:0048873	homeostasis of number of cells within a tissue	2/198	28/18800	0.0348661	0.0817543	0.0466251	BCL2/BAX	2	0
BP	GO:0060512	prostate gland morphogenesis	2/198	28/18800	0.0348661	0.0817543	0.0466251	MMP2/TNC	2	1.41421
BP	GO:0060765	regulation of androgen receptor signaling pathway	2/198	28/18800	0.0348661	0.0817543	0.0466251	PARK7/HDAC6	2	-1.41421
BP	GO:0072539	T-helper 17 cell differentiation	2/198	28/18800	0.0348661	0.0817543	0.0466251	SMAD7/MALT1	2	0
BP	GO:1901017	negative regulation of potassium ion transmembrane transporter activity	2/198	28/18800	0.0348661	0.0817543	0.0466251	SUMO1/CAV1	2	0
BP	GO:1903318	negative regulation of protein maturation	2/198	28/18800	0.0348661	0.0817543	0.0466251	XIAP/CARD8	2	0
BP	GO:1903649	regulation of cytoplasmic transport	2/198	28/18800	0.0348661	0.0817543	0.0466251	MAPK1/MAPK3	2	0
BP	GO:0060402	calcium ion transport into cytosol	5/198	171/18800	0.0349164	0.0817543	0.0466251	BAK1/BCL2/CAV1/PKD2/BAX	5	0.447214
BP	GO:0002287	alpha-beta T cell activation involved in immune response	3/198	68/18800	0.0349959	0.0817543	0.0466251	SMAD7/RIPK2/MALT1	3	0.57735
BP	GO:0002293	alpha-beta T cell differentiation involved in immune response	3/198	68/18800	0.0349959	0.0817543	0.0466251	SMAD7/RIPK2/MALT1	3	0.57735
BP	GO:0009206	purine ribonucleoside triphosphate biosynthetic process	3/198	68/18800	0.0349959	0.0817543	0.0466251	VCP/PINK1/TGFB1	3	-0.57735
BP	GO:0042987	amyloid precursor protein catabolic process	3/198	68/18800	0.0349959	0.0817543	0.0466251	TNF/RELA/CASP3	3	-1.73205
BP	GO:0043627	response to estrogen	3/198	68/18800	0.0349959	0.0817543	0.0466251	CAV1/TGFBR2/MMP2	3	1.73205
BP	GO:0051148	negative regulation of muscle cell differentiation	3/198	68/18800	0.0349959	0.0817543	0.0466251	BMP2/BMPR2/BMPR1A	3	-0.57735
BP	GO:0061180	mammary gland epithelium development	3/198	68/18800	0.0349959	0.0817543	0.0466251	MAPK1/AKT1/BAX	3	0.57735
BP	GO:1900046	regulation of hemostasis	3/198	68/18800	0.0349959	0.0817543	0.0466251	COMP/PRKCD/CAV1	3	-0.57735
BP	GO:1903317	regulation of protein maturation	3/198	68/18800	0.0349959	0.0817543	0.0466251	XIAP/CARD8/GSN	3	0.57735
BP	GO:0010594	regulation of endothelial cell migration	6/198	230/18800	0.0352295	0.0822473	0.0469062	TNF/CD40/BMPR2/HSPB1/AKT1/TGFB1	6	-0.816497
BP	GO:0045446	endothelial cell differentiation	4/198	117/18800	0.0352854	0.082325	0.0469506	TNF/TNFRSF1A/IKBKB/BMPR2	4	-2
BP	GO:0032368	regulation of lipid transport	4/198	118/18800	0.0362336	0.0844833	0.0481815	PRKCD/AKT1/FIS1/IL1A	4	1
BP	GO:0009145	purine nucleoside triphosphate biosynthetic process	3/198	69/18800	0.0363115	0.084503	0.0481927	VCP/PINK1/TGFB1	3	-0.57735
BP	GO:0043550	regulation of lipid kinase activity	3/198	69/18800	0.0363115	0.084503	0.0481927	AMBRA1/NOD2/TGFB1	3	-0.57735
BP	GO:0046635	positive regulation of alpha-beta T cell activation	3/198	69/18800	0.0363115	0.084503	0.0481927	RIPK2/MALT1/TGFBR2	3	1.73205
BP	GO:0010469	regulation of signaling receptor activity	5/198	173/18800	0.0364266	0.0846627	0.0482838	TNF/PRKCD/PARK7/HDAC6/PINK1	5	-2.23607
BP	GO:0061013	regulation of mRNA catabolic process	5/198	173/18800	0.0364266	0.0846627	0.0482838	PRKCD/AKT1/TARDBP/TRAF2/TRAF5	5	1.34164
BP	GO:0071375	cellular response to peptide hormone stimulus	7/198	294/18800	0.0365074	0.0847967	0.0483602	ESRRA/RELA/PRKCD/CFLAR/AKT1/CAV1/FOXO1	7	-0.377964
BP	GO:0071692	protein localization to extracellular region	8/198	359/18800	0.0367731	0.0853594	0.0486811	COMP/TNF/BAD/PARK7/RAF1/TGFB1/DNM1L/IL1A	8	0
BP	GO:1901361	organic cyclic compound catabolic process	10/198	494/18800	0.0368432	0.0854133	0.0487118	VCP/PRKCD/TNFRSF1B/AKT1/TARDBP/TRAF2/APAF1/LRPPRC/TRAF5/BAX	10	1.26491
BP	GO:0001773	myeloid dendritic cell activation	2/198	29/18800	0.0371942	0.0854133	0.0487118	TRAF6/TGFBR2	2	0
BP	GO:0002068	glandular epithelial cell development	2/198	29/18800	0.0371942	0.0854133	0.0487118	BAD/AKT1	2	0
BP	GO:0003209	cardiac atrium morphogenesis	2/198	29/18800	0.0371942	0.0854133	0.0487118	BMP2/BMPR2	2	-1.41421
BP	GO:0003309	type B pancreatic cell differentiation	2/198	29/18800	0.0371942	0.0854133	0.0487118	BAD/AKT1	2	0
BP	GO:0010464	regulation of mesenchymal cell proliferation	2/198	29/18800	0.0371942	0.0854133	0.0487118	BMPR1A/TGFBR2	2	1.41421
BP	GO:0010575	positive regulation of vascular endothelial growth factor production	2/198	29/18800	0.0371942	0.0854133	0.0487118	TGFB1/IL1A	2	1.41421
BP	GO:0010667	negative regulation of cardiac muscle cell apoptotic process	2/198	29/18800	0.0371942	0.0854133	0.0487118	CFLAR/SIRT5	2	-1.41421
BP	GO:0030970	retrograde protein transport, ER to cytosol	2/198	29/18800	0.0371942	0.0854133	0.0487118	VCP/UBE2G2	2	-1.41421
BP	GO:0032369	negative regulation of lipid transport	2/198	29/18800	0.0371942	0.0854133	0.0487118	AKT1/FIS1	2	1.41421
BP	GO:0051481	negative regulation of cytosolic calcium ion concentration	2/198	29/18800	0.0371942	0.0854133	0.0487118	BCL2/PKD2	2	0
BP	GO:0055022	negative regulation of cardiac muscle tissue growth	2/198	29/18800	0.0371942	0.0854133	0.0487118	PTEN/TGFBR2	2	0
BP	GO:0061117	negative regulation of heart growth	2/198	29/18800	0.0371942	0.0854133	0.0487118	PTEN/TGFBR2	2	0
BP	GO:0061437	renal system vasculature development	2/198	29/18800	0.0371942	0.0854133	0.0487118	CFLAR/PKD2	2	0
BP	GO:0061440	kidney vasculature development	2/198	29/18800	0.0371942	0.0854133	0.0487118	CFLAR/PKD2	2	0
BP	GO:0097421	liver regeneration	2/198	29/18800	0.0371942	0.0854133	0.0487118	GFER/TNF	2	-1.41421
BP	GO:1903513	endoplasmic reticulum to cytosol transport	2/198	29/18800	0.0371942	0.0854133	0.0487118	VCP/UBE2G2	2	-1.41421
BP	GO:0043534	blood vessel endothelial cell migration	5/198	175/18800	0.0379764	0.0871	0.0496738	TNF/CD40/HSPB1/AKT1/TGFB1	5	-0.447214
BP	GO:0046890	regulation of lipid biosynthetic process	5/198	175/18800	0.0379764	0.0871	0.0496738	TNF/BMP2/PRKCD/AKT1/IL1A	5	-0.447214
BP	GO:0006413	translational initiation	4/198	120/18800	0.0381739	0.0874978	0.0499007	DDX3X/TNF/PPP1R15B/HSPB1	4	-2
BP	GO:0001818	negative regulation of cytokine production	8/198	363/18800	0.0388432	0.0889761	0.0507438	TNF/SMAD7/OTUD7B/NOD2/TGFB1/CARD8/SYT11/FN1	8	0
BP	GO:1904427	positive regulation of calcium ion transmembrane transport	3/198	71/18800	0.039018	0.0893204	0.0509401	SUMO1/PKD2/BAX	3	0.57735
BP	GO:0048675	axon extension	4/198	121/18800	0.039166	0.089603	0.0511013	HSP90AA1/BMPR2/CTTN/FN1	4	0
BP	GO:0048736	appendage development	5/198	177/18800	0.0395662	0.0903808	0.0515449	COMP/BAK1/BMPR2/BMPR1A/BAX	5	-0.447214
BP	GO:0060173	limb development	5/198	177/18800	0.0395662	0.0903808	0.0515449	COMP/BAK1/BMPR2/BMPR1A/BAX	5	-0.447214
BP	GO:0045948	positive regulation of translational initiation	2/198	30/18800	0.0395803	0.0903808	0.0515449	DDX3X/TNF	2	-1.41421
BP	GO:0045444	fat cell differentiation	6/198	237/18800	0.0398335	0.0909021	0.0518422	TNF/BMP2/HDAC6/AKT1/TGFB1/FOXO1	6	0
BP	GO:0006941	striated muscle contraction	5/198	178/18800	0.0403761	0.0920421	0.0524923	TNF/SUMO1/SMAD7/CAV1/GSN	5	-0.447214
BP	GO:0050810	regulation of steroid biosynthetic process	3/198	72/18800	0.0404087	0.0920421	0.0524923	TNF/BMP2/IL1A	3	-0.57735
BP	GO:0051937	catecholamine transport	3/198	72/18800	0.0404087	0.0920421	0.0524923	PARK7/PINK1/SYT11	3	-0.57735
BP	GO:0010948	negative regulation of cell cycle process	7/198	301/18800	0.0406056	0.0924328	0.0527152	BCL2/FBXO7/PTEN/PIDD1/CRADD/PKD2/CASP2	7	0.377964
BP	GO:0010906	regulation of glucose metabolic process	4/198	123/18800	0.0411943	0.0935885	0.0533743	BAD/AKT1/COX11/FOXO1	4	1
BP	GO:1901989	positive regulation of cell cycle phase transition	4/198	123/18800	0.0411943	0.0935885	0.0533743	DDX3X/AKT1/ADAMTS1/UBE2E2	4	1
BP	GO:0008361	regulation of cell size	5/198	179/18800	0.0411961	0.0935885	0.0533743	BMPR2/PTEN/NGF/CTTN/FN1	5	0.447214
BP	GO:0032984	protein-containing complex disassembly	6/198	239/18800	0.0412159	0.0935885	0.0533743	TNF/VCP/CALCOCO2/HDAC6/BECN1/GSN	6	-0.816497
BP	GO:0033555	multicellular organismal response to stress	3/198	73/18800	0.0418243	0.0948521	0.0540949	BCL2/PTEN/AKT1	3	-0.57735
BP	GO:0045123	cellular extravasation	3/198	73/18800	0.0418243	0.0948521	0.0540949	FADD/RIPK3/TNF	3	-1.73205
BP	GO:0000002	mitochondrial genome maintenance	2/198	31/18800	0.0420229	0.0949555	0.0541538	OPA1/SLC25A4	2	1.41421
BP	GO:0010039	response to iron ion	2/198	31/18800	0.0420229	0.0949555	0.0541538	BCL2/BECN1	2	0
BP	GO:0010664	negative regulation of striated muscle cell apoptotic process	2/198	31/18800	0.0420229	0.0949555	0.0541538	CFLAR/SIRT5	2	-1.41421
BP	GO:0032148	activation of protein kinase B activity	2/198	31/18800	0.0420229	0.0949555	0.0541538	PARK7/PINK1	2	-1.41421
BP	GO:0045737	positive regulation of cyclin-dependent protein serine/threonine kinase activity	2/198	31/18800	0.0420229	0.0949555	0.0541538	AKT1/PKD2	2	1.41421
BP	GO:2001257	regulation of cation channel activity	5/198	180/18800	0.0420261	0.0949555	0.0541538	SUMO1/PINK1/CAV1/PKD2/MMP9	5	0.447214
BP	GO:0002688	regulation of leukocyte chemotaxis	4/198	124/18800	0.0422304	0.095358	0.0543834	NOD2/MAPK1/MAPK3/DNM1L	4	0
BP	GO:0009201	ribonucleoside triphosphate biosynthetic process	3/198	74/18800	0.0432646	0.0974894	0.055599	VCP/PINK1/TGFB1	3	-0.57735
BP	GO:0035924	cellular response to vascular endothelial growth factor stimulus	3/198	74/18800	0.0432646	0.0974894	0.055599	RELA/HSPB1/AKT1	3	-0.57735
BP	GO:0045669	positive regulation of osteoblast differentiation	3/198	74/18800	0.0432646	0.0974894	0.055599	BMP2/BMPR2/BMPR1A	3	-0.57735
BP	GO:0043244	regulation of protein-containing complex disassembly	4/198	125/18800	0.0432811	0.0974894	0.055599	TNF/CALCOCO2/HDAC6/GSN	4	-1
BP	GO:0006308	DNA catabolic process	2/198	32/18800	0.0445206	0.0997056	0.0568628	APAF1/BAX	2	1.41421
BP	GO:0035883	enteroendocrine cell differentiation	2/198	32/18800	0.0445206	0.0997056	0.0568628	BAD/AKT1	2	0
BP	GO:0043372	positive regulation of CD4-positive, alpha-beta T cell differentiation	2/198	32/18800	0.0445206	0.0997056	0.0568628	RIPK2/MALT1	2	1.41421
BP	GO:0060914	heart formation	2/198	32/18800	0.0445206	0.0997056	0.0568628	BMP2/BMPR1A	2	0
BP	GO:1900745	positive regulation of p38MAPK cascade	2/198	32/18800	0.0445206	0.0997056	0.0568628	MAP3K5/BMP2	2	-1.41421
BP	GO:1901380	negative regulation of potassium ion transmembrane transport	2/198	32/18800	0.0445206	0.0997056	0.0568628	SUMO1/CAV1	2	0
BP	GO:1902253	regulation of intrinsic apoptotic signaling pathway by p53 class mediator	2/198	32/18800	0.0445206	0.0997056	0.0568628	BCL2/UBB	2	-1.41421
BP	GO:1902624	positive regulation of neutrophil migration	2/198	32/18800	0.0445206	0.0997056	0.0568628	DNM1L/IL1A	2	1.41421
BP	GO:0006109	regulation of carbohydrate metabolic process	5/198	183/18800	0.0445765	0.0997056	0.0568628	BAD/AKT1/TGFB1/COX11/FOXO1	5	1.34164
BP	GO:0045766	positive regulation of angiogenesis	5/198	183/18800	0.0445765	0.0997056	0.0568628	CD40/TLR3/HSPB1/TGFBR2/IL1A	5	-0.447214
BP	GO:1904018	positive regulation of vasculature development	5/198	183/18800	0.0445765	0.0997056	0.0568628	CD40/TLR3/HSPB1/TGFBR2/IL1A	5	-0.447214
BP	GO:0002437	inflammatory response to antigenic stimulus	3/198	75/18800	0.0447295	0.0997056	0.0568628	TNF/PARK7/NOD2	3	-1.73205
BP	GO:0002534	cytokine production involved in inflammatory response	3/198	75/18800	0.0447295	0.0997056	0.0568628	TICAM1/TNF/NOD2	3	-1.73205
BP	GO:0045685	regulation of glial cell differentiation	3/198	75/18800	0.0447295	0.0997056	0.0568628	BMP2/TNFRSF1B/TGFB1	3	-0.57735
BP	GO:0071230	cellular response to amino acid stimulus	3/198	75/18800	0.0447295	0.0997056	0.0568628	TNF/BCL2L1/MMP2	3	-0.57735
BP	GO:0086003	cardiac muscle cell contraction	3/198	75/18800	0.0447295	0.0997056	0.0568628	SUMO1/CAV1/GSN	3	0.57735
BP	GO:1900015	regulation of cytokine production involved in inflammatory response	3/198	75/18800	0.0447295	0.0997056	0.0568628	TICAM1/TNF/NOD2	3	-1.73205
BP	GO:0042593	glucose homeostasis	6/198	244/18800	0.0448034	0.0998094	0.0569221	BAD/PARK7/AKT1/RAF1/FOXO3/FOXO1	6	0.816497
CC	GO:0070069	cytochrome complex	22/198	42/19594	1.63944e-33	5.06587e-31	3.84837e-31	UQCRH/UQCR11/COX7A2L/UQCRC2/COX8A/COX4I1/UQCRHL/COX5A/COX7B/CYC1/UQCRC1/COX5B/COX6A1/UQCRFS1/COX7C/UQCRB/UQCR10/UQCRQ/NDUFA4/COX6B1/COX4I2/COX6C	22	3.83761
CC	GO:0005741	mitochondrial outer membrane	32/198	205/19594	6.75127e-29	1.04307e-26	7.92386e-27	CYB5A/BAK1/BCL2/CASP8/BID/BCL2L1/PGAM5/UBB/AMBRA1/BAD/TOMM22/VDAC3/MFN2/RHOT2/UBC/RPS27A/PINK1/RAF1/VDAC2/RHOT1/TOMM20/FOXO3/UBA52/MFN1/OPA1/HAX1/FIS1/DNM1L/VDAC1/TOMM40/BAX/TOMM7	32	-0.353553
CC	GO:0031968	organelle outer membrane	33/198	232/19594	2.01931e-28	2.07989e-26	1.58002e-26	CYB5A/BAK1/BCL2/CASP8/BID/BCL2L1/PGAM5/UBB/AMBRA1/BAD/TOMM22/VDAC3/MFN2/RHOT2/UBC/RPS27A/PINK1/RAF1/VDAC2/LRPPRC/RHOT1/TOMM20/FOXO3/UBA52/MFN1/OPA1/HAX1/FIS1/DNM1L/VDAC1/TOMM40/BAX/TOMM7	33	-0.174078
CC	GO:0019867	outer membrane	33/198	234/19594	2.69369e-28	2.08088e-26	1.58077e-26	CYB5A/BAK1/BCL2/CASP8/BID/BCL2L1/PGAM5/UBB/AMBRA1/BAD/TOMM22/VDAC3/MFN2/RHOT2/UBC/RPS27A/PINK1/RAF1/VDAC2/LRPPRC/RHOT1/TOMM20/FOXO3/UBA52/MFN1/OPA1/HAX1/FIS1/DNM1L/VDAC1/TOMM40/BAX/TOMM7	33	-0.174078
CC	GO:0070469	respirasome	25/198	101/19594	4.5638e-28	2.82043e-26	2.14258e-26	UQCRH/UQCR11/SURF1/COX7A2L/SDHB/UQCRC2/COX8A/COX4I1/UQCRHL/COX5A/COX7B/CYC1/UQCRC1/COX5B/CYCS/COX6A1/UQCRFS1/COX7C/UQCRB/UQCR10/UQCRQ/NDUFA4/COX6B1/COX4I2/COX6C	25	4.2
CC	GO:0005746	mitochondrial respirasome	24/198	94/19594	2.44691e-27	1.26016e-25	9.573e-26	UQCRH/UQCR11/SURF1/COX7A2L/SDHB/UQCRC2/COX8A/COX4I1/UQCRHL/COX5A/COX7B/CYC1/UQCRC1/COX5B/COX6A1/UQCRFS1/COX7C/UQCRB/UQCR10/UQCRQ/NDUFA4/COX6B1/COX4I2/COX6C	24	4.08248
CC	GO:0098798	mitochondrial protein-containing complex	34/198	281/19594	7.25483e-27	3.20249e-25	2.43282e-25	SLC25A6/UQCRH/UQCR11/TOMM22/SLC25A5/PPIF/COX7A2L/SDHB/TOMM20/UQCRC2/COX8A/MFN1/COX4I1/UQCRHL/COX5A/COX7B/CYC1/UQCRC1/COX5B/COX6A1/UQCRFS1/COX7C/UQCRB/VDAC1/TOMM40/UQCR10/BAX/TOMM7/UQCRQ/NDUFA4/COX6B1/COX4I2/COX6C/SLC25A4	34	4.45896
CC	GO:0098803	respiratory chain complex	23/198	91/19594	4.00334e-26	1.54629e-24	1.17466e-24	UQCRH/UQCR11/COX7A2L/SDHB/UQCRC2/COX8A/COX4I1/UQCRHL/COX5A/COX7B/CYC1/UQCRC1/COX5B/COX6A1/UQCRFS1/COX7C/UQCRB/UQCR10/UQCRQ/NDUFA4/COX6B1/COX4I2/COX6C	23	3.96177
CC	GO:0005751	mitochondrial respiratory chain complex IV	14/198	25/19594	2.93971e-22	1.0093e-20	7.6673e-21	COX7A2L/UQCRC2/COX8A/COX4I1/COX5A/COX7B/COX5B/COX6A1/UQCRFS1/COX7C/NDUFA4/COX6B1/COX4I2/COX6C	14	3.74166
CC	GO:0005743	mitochondrial inner membrane	37/198	491/19594	7.03307e-22	2.17322e-20	1.65092e-20	SLC25A6/HCCS/BCL2L1/UQCRH/UQCR11/PINK1/SLC25A5/SURF1/COX7A2L/COX18/SDHB/SCO1/UQCRC2/COX8A/COX4I1/COX11/UQCRHL/COX5A/COX7B/CYC1/UQCRC1/COX5B/CYCS/OPA1/COX6A1/UQCRFS1/COX7C/UQCRB/TOMM40/UQCR10/UQCRQ/NDUFA4/PARL/COX6B1/COX4I2/COX6C/SLC25A4	37	4.10997
CC	GO:0098800	inner mitochondrial membrane protein complex	24/198	155/19594	9.01678e-22	2.5329e-20	1.92415e-20	SLC25A6/UQCRH/UQCR11/COX7A2L/SDHB/UQCRC2/COX8A/COX4I1/UQCRHL/COX5A/COX7B/CYC1/UQCRC1/COX5B/COX6A1/UQCRFS1/COX7C/UQCRB/UQCR10/UQCRQ/NDUFA4/COX6B1/COX4I2/COX6C	24	3.67423
CC	GO:0045277	respiratory chain complex IV	14/198	28/19594	2.57672e-21	6.63506e-20	5.04043e-20	COX7A2L/UQCRC2/COX8A/COX4I1/COX5A/COX7B/COX5B/COX6A1/UQCRFS1/COX7C/NDUFA4/COX6B1/COX4I2/COX6C	14	3.74166
CC	GO:0005750	mitochondrial respiratory chain complex III	10/198	14/19594	8.537e-18	1.88424e-16	1.43139e-16	UQCRH/UQCR11/UQCRC2/UQCRHL/CYC1/UQCRC1/UQCRFS1/UQCRB/UQCR10/UQCRQ	10	1.89737
CC	GO:0045275	respiratory chain complex III	10/198	14/19594	8.537e-18	1.88424e-16	1.43139e-16	UQCRH/UQCR11/UQCRC2/UQCRHL/CYC1/UQCRC1/UQCRFS1/UQCRB/UQCR10/UQCRQ	10	1.89737
CC	GO:0045121	membrane raft	26/198	326/19594	3.62568e-16	7.4689e-15	5.67387e-15	FADD/BCL10/CASP8/TNF/TNFRSF1A/TGFBR1/FAS/IKBKB/PARK7/HDAC6/CFLAR/BMPR2/TRADD/TNFRSF1B/CASP3/MAPK1/SLC25A5/RIPK1/TRAF2/BMPR1A/MAPK3/CAV1/PPP2CA/TGFBR2/VDAC1/BIRC3	26	-1.1767
CC	GO:0098857	membrane microdomain	26/198	327/19594	3.90516e-16	7.54183e-15	5.72927e-15	FADD/BCL10/CASP8/TNF/TNFRSF1A/TGFBR1/FAS/IKBKB/PARK7/HDAC6/CFLAR/BMPR2/TRADD/TNFRSF1B/CASP3/MAPK1/SLC25A5/RIPK1/TRAF2/BMPR1A/MAPK3/CAV1/PPP2CA/TGFBR2/VDAC1/BIRC3	26	-1.1767
CC	GO:0035631	CD40 receptor complex	8/198	11/19594	1.51689e-14	2.75716e-13	2.09452e-13	CD40/CHUK/IKBKB/TRAF6/HTRA2/TRAF2/TRAF3/TRAF5	8	-0.707107
CC	GO:0046930	pore complex	10/198	26/19594	4.07792e-14	7.00044e-13	5.31799e-13	BAK1/BCL2/VDAC3/SLC25A5/PPIF/VDAC2/VDAC1/TOMM40/BAX/SLC25A4	10	1.26491
CC	GO:0098573	intrinsic component of mitochondrial membrane	14/198	90/19594	3.36172e-13	5.46721e-12	4.15326e-12	BAK1/BID/MFN2/RHOT2/PINK1/COX18/RHOT1/TOMM20/SCO1/MFN1/COX11/FIS1/TOMM40/SLC25A4	14	1.06904
CC	GO:0031306	intrinsic component of mitochondrial outer membrane	9/198	25/19594	1.6264e-12	2.51279e-11	1.90888e-11	BAK1/MFN2/RHOT2/PINK1/RHOT1/TOMM20/MFN1/FIS1/TOMM40	9	0.333333
CC	GO:0032592	integral component of mitochondrial membrane	13/198	88/19594	4.76821e-12	7.01608e-11	5.32988e-11	BAK1/BID/RHOT2/PINK1/COX18/RHOT1/TOMM20/SCO1/MFN1/COX11/FIS1/TOMM40/SLC25A4	13	1.38675
CC	GO:0031307	integral component of mitochondrial outer membrane	8/198	24/19594	6.04182e-11	8.48601e-10	6.44654e-10	BAK1/RHOT2/PINK1/RHOT1/TOMM20/MFN1/FIS1/TOMM40	8	0.707107
CC	GO:1990204	oxidoreductase complex	13/198	120/19594	2.62377e-10	3.52498e-09	2.67781e-09	CAT/UQCRH/UQCR11/SDHB/UQCRC2/UQCRHL/CYC1/UQCRC1/UQCRFS1/UQCRB/UQCR10/UQCRQ/NDUFA4	13	1.94145
CC	GO:0005758	mitochondrial intermembrane space	10/198	83/19594	1.13377e-08	1.45972e-07	1.1089e-07	GFER/CAT/HTRA2/PARK7/SIRT5/PINK1/COX19/CYCS/OPA1/HAX1	10	-0.632456
CC	GO:0031970	organelle envelope lumen	10/198	93/19594	3.45068e-08	4.26504e-07	3.24001e-07	GFER/CAT/HTRA2/PARK7/SIRT5/PINK1/COX19/CYCS/OPA1/HAX1	10	-0.632456
CC	GO:1905369	endopeptidase complex	9/198	79/19594	1.0239e-07	1.21686e-06	9.24407e-07	CASP9/VCP/HTRA2/ADRM1/HSPB1/PIDD1/CRADD/PSMD4/CASP2	9	-0.333333
CC	GO:1905368	peptidase complex	9/198	111/19594	1.90375e-06	2.17873e-05	1.65511e-05	CASP9/VCP/HTRA2/ADRM1/HSPB1/PIDD1/CRADD/PSMD4/CASP2	9	-0.333333
CC	GO:0098799	outer mitochondrial membrane protein complex	5/198	22/19594	2.2939e-06	2.53148e-05	1.92308e-05	TOMM22/TOMM20/MFN1/TOMM40/TOMM7	5	1.34164
CC	GO:0098562	cytoplasmic side of membrane	11/198	193/19594	4.45244e-06	4.74415e-05	3.60397e-05	CHUK/IKBKB/TRAF6/HTRA2/PTEN/AKT1/TRAF2/TRAF3/PKD2/TRAF5/TRAF1	11	0.301511
CC	GO:0009898	cytoplasmic side of plasma membrane	10/198	169/19594	8.78257e-06	9.04604e-05	6.87197e-05	CHUK/IKBKB/TRAF6/HTRA2/PTEN/AKT1/TRAF2/TRAF3/TRAF5/TRAF1	10	0
CC	GO:0016234	inclusion body	7/198	74/19594	9.82457e-06	9.79288e-05	7.43932e-05	SQSTM1/STUB1/FBXO7/HDAC6/EPS15/PINK1/ATXN3	7	-1.88982
CC	GO:0098802	plasma membrane signaling receptor complex	13/198	313/19594	1.89085e-05	0.000181556	0.000137922	TGFBR1/CD40/BMP2/CHUK/IKBKB/TRAF6/HTRA2/TRAF2/BMPR1A/TRAF3/TRAF5/TGFBR2/TRAF1	13	-0.27735
CC	GO:0005901	caveola	7/198	82/19594	1.93894e-05	0.000181556	0.000137922	HDAC6/BMPR2/MAPK1/BMPR1A/MAPK3/CAV1/TGFBR2	7	0.377964
CC	GO:0031300	intrinsic component of organelle membrane	15/198	412/19594	2.0393e-05	0.000185336	0.000140794	BAK1/BID/MFN2/RHOT2/PINK1/COX18/RHOT1/TOMM20/SCO1/PKD2/MFN1/COX11/FIS1/TOMM40/SLC25A4	15	1.29099
CC	GO:0031301	integral component of organelle membrane	14/198	382/19594	3.60252e-05	0.000318051	0.000241613	BAK1/BID/RHOT2/PINK1/COX18/RHOT1/TOMM20/SCO1/PKD2/MFN1/COX11/FIS1/TOMM40/SLC25A4	14	1.60357
CC	GO:1904813	ficolin-1-rich granule lumen	8/198	124/19594	3.81913e-05	0.000327809	0.000249025	DDX3X/HSP90AA1/CAT/VCP/MAPK1/APAF1/GSN/MMP9	8	-0.707107
CC	GO:0005742	mitochondrial outer membrane translocase complex	4/198	21/19594	5.29104e-05	0.000441873	0.000335676	TOMM22/TOMM20/TOMM40/TOMM7	4	1
CC	GO:0000151	ubiquitin ligase complex	12/198	302/19594	6.09239e-05	0.000495407	0.000376344	UBE2L6/UBE2D1/STUB1/FBXO7/AMBRA1/IKBKG/UBE2N/UBE2L3/TRAF2/COMMD1/SHARPIN/UBE2D2	12	-1.1547
CC	GO:0044853	plasma membrane raft	7/198	113/19594	0.00015139	0.00119947	0.000911198	HDAC6/BMPR2/MAPK1/BMPR1A/MAPK3/CAV1/TGFBR2	7	0.377964
CC	GO:1902495	transmembrane transporter complex	12/198	377/19594	0.000473161	0.00365517	0.00277671	UQCRH/UQCR11/PKD2/UQCRC2/UQCRHL/CYC1/UQCRC1/UQCRFS1/UQCRB/UQCR10/UQCRQ/NDUFA4	12	2.3094
CC	GO:0101002	ficolin-1-rich granule	8/198	185/19594	0.000600601	0.00452648	0.00343861	DDX3X/HSP90AA1/CAT/VCP/MAPK1/APAF1/GSN/MMP9	8	-0.707107
CC	GO:0031143	pseudopodium	3/198	18/19594	0.000741516	0.00535573	0.00406857	MAPK1/RAF1/MAPK3	3	0.57735
CC	GO:0030139	endocytic vesicle	11/198	342/19594	0.000745296	0.00535573	0.00406857	HSP90AA1/UBB/UBC/RPS27A/NOD2/BECN1/CAV1/NOD1/UBA52/SYT11/GSN	11	0.301511
CC	GO:1990351	transporter complex	12/198	399/19594	0.000778715	0.00546871	0.00415439	UQCRH/UQCR11/PKD2/UQCRC2/UQCRHL/CYC1/UQCRC1/UQCRFS1/UQCRB/UQCR10/UQCRQ/NDUFA4	12	2.3094
CC	GO:0005776	autophagosome	6/198	112/19594	0.000972164	0.00658111	0.00499945	SQSTM1/TICAM1/CALCOCO2/AMBRA1/BECN1/OPTN	6	-0.816497
CC	GO:0009295	nucleoid	4/198	44/19594	0.00100101	0.00658111	0.00499945	SLC25A5/VDAC2/LRPPRC/VDAC1	4	2
CC	GO:0042645	mitochondrial nucleoid	4/198	44/19594	0.00100101	0.00658111	0.00499945	SLC25A5/VDAC2/LRPPRC/VDAC1	4	2
CC	GO:1902911	protein kinase complex	6/198	115/19594	0.00111525	0.00717939	0.00545394	MAP3K5/TGFBR1/CHUK/IKBKB/IKBKG/TGFBR2	6	-1.63299
CC	GO:0062023	collagen-containing extracellular matrix	12/198	429/19594	0.0014474	0.0091275	0.00693386	COMP/ADAMTS4/LUM/TGFB1/ADAMTS1/HTRA1/PRELP/MMP9/FN1/FMOD/MMP2/TNC	12	1.73205
CC	GO:0034774	secretory granule lumen	10/198	322/19594	0.00167155	0.0103302	0.0078475	DDX3X/HSP90AA1/CAT/VCP/PRKCD/MAPK1/TGFB1/APAF1/GSN/FN1	10	-0.632456
CC	GO:0060205	cytoplasmic vesicle lumen	10/198	325/19594	0.00178942	0.0108418	0.00823613	DDX3X/HSP90AA1/CAT/VCP/PRKCD/MAPK1/TGFB1/APAF1/GSN/FN1	10	-0.632456
CC	GO:0031983	vesicle lumen	10/198	327/19594	0.00187167	0.011122	0.00844904	DDX3X/HSP90AA1/CAT/VCP/PRKCD/MAPK1/TGFB1/APAF1/GSN/FN1	10	-0.632456
CC	GO:0005775	vacuolar lumen	7/198	174/19594	0.00198594	0.0115784	0.00879573	LUM/HSP90AA1/VCP/PRKCD/MAPK1/PRELP/FMOD	7	-1.13389
CC	GO:0005819	spindle	11/198	402/19594	0.00268409	0.0153589	0.0116677	BIRC6/XIAP/IKBKG/HSPB1/MAPK1/AKT1/SLC25A5/CTTN/PPP2CA/PKD2/BIRC5	11	0.301511
CC	GO:0000502	proteasome complex	4/198	59/19594	0.00298372	0.0167631	0.0127344	VCP/ADRM1/HSPB1/PSMD4	4	-1
CC	GO:1902554	serine/threonine protein kinase complex	5/198	99/19594	0.00332633	0.0183542	0.0139431	TGFBR1/CHUK/IKBKB/IKBKG/TGFBR2	5	-1.34164
CC	GO:0005796	Golgi lumen	5/198	104/19594	0.0041077	0.022268	0.0169163	LUM/TGFB1/NGF/PRELP/FMOD	5	1.34164
CC	GO:0016605	PML body	5/198	105/19594	0.00427842	0.0227937	0.0173156	SQSTM1/CALCOCO2/SUMO1/PARK7/PTEN	5	-2.23607
CC	GO:0016235	aggresome	3/198	35/19594	0.00524349	0.0274616	0.0208617	SQSTM1/HDAC6/EPS15	3	-1.73205
CC	GO:0005905	clathrin-coated pit	4/198	70/19594	0.00551641	0.0284095	0.0215818	BMPR2/EPS15/CTTN/DNM1L	4	0
CC	GO:0042405	nuclear inclusion body	2/198	12/19594	0.00627329	0.0317778	0.0241405	STUB1/ATXN3	2	0
CC	GO:0005759	mitochondrial matrix	11/198	473/19594	0.00887301	0.0442219	0.0335939	BCL2L1/FDX1/PARK7/SIRT5/SLC25A5/PPIF/VDAC2/LRPPRC/FOXO3/ATXN3/VDAC1	11	0.904534
CC	GO:0043209	myelin sheath	3/198	45/19594	0.0105614	0.0518009	0.0393514	BCL2/HSP90AA1/PTEN	3	-1.73205
CC	GO:0045335	phagocytic vesicle	5/198	138/19594	0.013175	0.0636107	0.0483229	NOD2/BECN1/NOD1/SYT11/GSN	5	1.34164
CC	GO:0001650	fibrillar center	5/198	140/19594	0.0139479	0.065433	0.0497072	ESRRA/UBE2N/SMAD7/MALT1/MAP3K14	5	-0.447214
CC	GO:0061702	inflammasome complex	2/198	18/19594	0.013976	0.065433	0.0497072	DDX3X/CARD8	2	0
CC	GO:0005838	proteasome regulatory particle	2/198	19/19594	0.0155174	0.0715653	0.0543657	ADRM1/PSMD4	2	0
CC	GO:0061695	transferase complex, transferring phosphorus-containing groups	7/198	259/19594	0.0164571	0.0745436	0.0566282	MAP3K5/TGFBR1/CHUK/IKBKB/IKBKG/BECN1/TGFBR2	7	-1.13389
CC	GO:0043202	lysosomal lumen	4/198	97/19594	0.016908	0.0745436	0.0566282	LUM/HSP90AA1/PRELP/FMOD	4	0
CC	GO:0030027	lamellipodium	6/198	202/19594	0.0169531	0.0745436	0.0566282	DDX3X/AKT1/CTTN/PKD2/GSN/HAX1	6	1.63299
CC	GO:0044233	mitochondria-associated endoplasmic reticulum membrane	2/198	20/19594	0.0171281	0.0745436	0.0566282	TOMM20/TOMM40	2	1.41421
CC	GO:0005811	lipid droplet	4/198	100/19594	0.0186974	0.0802429	0.0609578	VCP/TRAF6/UBE2G2/CAV1	4	-1
CC	GO:0031305	integral component of mitochondrial inner membrane	3/198	56/19594	0.0190348	0.080572	0.0612078	COX18/SCO1/COX11	3	1.73205
CC	GO:0031304	intrinsic component of mitochondrial inner membrane	3/198	57/19594	0.0199462	0.0832887	0.0632716	COX18/SCO1/COX11	3	1.73205
CC	GO:0022624	proteasome accessory complex	2/198	23/19594	0.0223611	0.0921278	0.0699864	ADRM1/PSMD4	2	0
MF	GO:0031625	ubiquitin protein ligase binding	44/196	298/18410	1.08642e-37	4.50864e-35	2.84756e-35	CASP10/BCL2/BCL10/UBE2L6/SQSTM1/CASP8/BID/HSP90AA1/CD40/VCP/UBE2D1/UBB/STUB1/FBXO7/TRAF6/AMBRA1/RELA/IKBKG/MFN2/SUMO1/UBE2N/HDAC6/UBC/SMAD7/RPS27A/TNFRSF1B/UBE2L3/PINK1/UBE2G1/BECN1/SLC25A5/RIPK1/TRAF2/LRPPRC/TRAF3/TRAF5/ATXN3/UBA52/SYT11/USP2/UQCRC1/TRAF1/FOXO1/DNM1L	44	-2.11058
MF	GO:0044389	ubiquitin-like protein ligase binding	44/196	317/18410	1.73994e-36	3.61037e-34	2.28023e-34	CASP10/BCL2/BCL10/UBE2L6/SQSTM1/CASP8/BID/HSP90AA1/CD40/VCP/UBE2D1/UBB/STUB1/FBXO7/TRAF6/AMBRA1/RELA/IKBKG/MFN2/SUMO1/UBE2N/HDAC6/UBC/SMAD7/RPS27A/TNFRSF1B/UBE2L3/PINK1/UBE2G1/BECN1/SLC25A5/RIPK1/TRAF2/LRPPRC/TRAF3/TRAF5/ATXN3/UBA52/SYT11/USP2/UQCRC1/TRAF1/FOXO1/DNM1L	44	-2.11058
MF	GO:0009055	electron transfer activity	22/196	125/18410	7.81705e-21	1.08136e-18	6.82963e-19	CYB5A/UQCRH/UQCR11/FDX1/SURF1/COX7A2L/SDHB/COX8A/COX4I1/COX11/COX5A/COX7B/CYC1/UQCRC1/COX5B/CYCS/COX6A1/UQCRFS1/UQCR10/NDUFA4/COX6B1/COX4I2	22	2.98481
MF	GO:0015453	oxidoreduction-driven active transmembrane transporter activity	17/196	72/18410	1.16687e-18	1.21063e-16	7.64608e-17	CYB5A/UQCRH/SURF1/COX7A2L/COX8A/COX4I1/COX5A/COX7B/CYC1/UQCRC1/COX5B/COX6A1/UQCRFS1/UQCR10/NDUFA4/COX6B1/COX4I2	17	3.15296
MF	GO:0032813	tumor necrosis factor receptor superfamily binding	15/196	49/18410	1.70789e-18	1.41755e-16	8.95294e-17	FADD/CASP8/TNF/BID/TRAF6/CFLAR/TRADD/CASP3/RIPK1/TRAF2/PIDD1/NGF/TRAF3/TRAF5/TRAF1	15	-0.258199
MF	GO:0004129	cytochrome-c oxidase activity	11/196	19/18410	1.05358e-17	7.28725e-16	4.60247e-16	CYB5A/SURF1/COX7A2L/COX8A/COX4I1/COX5A/COX7B/COX5B/COX6A1/COX6B1/COX4I2	11	2.7136
MF	GO:0016675	oxidoreductase activity, acting on a heme group of donors	11/196	20/18410	2.31971e-17	1.37526e-15	8.68582e-16	CYB5A/SURF1/COX7A2L/COX8A/COX4I1/COX5A/COX7B/COX5B/COX6A1/COX6B1/COX4I2	11	2.7136
MF	GO:0002020	protease binding	19/196	136/18410	3.47917e-16	1.80482e-14	1.13989e-14	COMP/BCL2/FADD/ADAMTS4/BCL10/TNF/VCP/ADRM1/SUMO1/PARK7/CFLAR/UBC/PTEN/CASP3/PINK1/RIPK2/CRADD/MALT1/FN1	19	-2.52357
MF	GO:0015078	proton transmembrane transporter activity	18/196	120/18410	5.90538e-16	2.72303e-14	1.71981e-14	CYB5A/UQCRH/SLC25A5/SURF1/COX7A2L/COX8A/COX4I1/COX5A/COX7B/CYC1/UQCRC1/COX5B/COX6A1/UQCRFS1/UQCR10/COX6B1/COX4I2/SLC25A4	18	3.29983
MF	GO:0015399	primary active transmembrane transporter activity	18/196	162/18410	1.27568e-13	5.29409e-12	3.34364e-12	CYB5A/UQCRH/SURF1/COX7A2L/TOMM20/COX8A/COX4I1/COX5A/COX7B/CYC1/UQCRC1/COX5B/COX6A1/UQCRFS1/UQCR10/NDUFA4/COX6B1/COX4I2	18	3.29983
MF	GO:0097153	cysteine-type endopeptidase activity involved in apoptotic process	8/196	15/18410	8.63477e-13	3.25766e-11	2.05747e-11	CASP10/CASP9/CASP7/CASP8/CFLAR/CASP3/CASP6/CASP2	8	-1.41421
MF	GO:0005126	cytokine receptor binding	21/196	272/18410	1.47432e-12	5.0987e-11	3.22023e-11	FADD/CASP8/TNF/BID/TGFBR1/TRAF6/CFLAR/TRADD/RNF41/SMAD7/CASP3/RIPK1/TGFB1/TRAF2/PIDD1/NGF/TRAF3/TRAF5/TGFBR2/TRAF1/IL1A	21	-0.218218
MF	GO:0061631	ubiquitin conjugating enzyme activity	10/196	36/18410	2.96938e-12	9.47919e-11	5.98686e-11	UBE2L6/UBE2D1/UBE2D3/BIRC6/UBE2G2/UBE2N/UBE2L3/UBE2G1/UBE2E2/UBE2D2	10	-1.89737
MF	GO:0061650	ubiquitin-like protein conjugating enzyme activity	10/196	39/18410	7.224e-12	2.1414e-10	1.35246e-10	UBE2L6/UBE2D1/UBE2D3/BIRC6/UBE2G2/UBE2N/UBE2L3/UBE2G1/UBE2E2/UBE2D2	10	-1.89737
MF	GO:0005164	tumor necrosis factor receptor binding	9/196	31/18410	2.40695e-11	6.65923e-10	4.20583e-10	FADD/CASP8/TNF/TRAF6/TRADD/TRAF2/TRAF3/TRAF5/TRAF1	9	-0.333333
MF	GO:0005123	death receptor binding	8/196	21/18410	2.58517e-11	6.70528e-10	4.23492e-10	FADD/CASP8/BID/CFLAR/CASP3/RIPK1/PIDD1/NGF	8	-0.707107
MF	GO:0022853	active ion transmembrane transporter activity	19/196	254/18410	3.13376e-11	7.65006e-10	4.83162e-10	CYB5A/SLC25A6/UQCRH/SLC25A5/SURF1/COX7A2L/COX8A/COX4I1/COX5A/COX7B/CYC1/UQCRC1/COX5B/COX6A1/UQCRFS1/UQCR10/COX6B1/COX4I2/SLC25A4	19	2.9824
MF	GO:0004175	endopeptidase activity	24/196	432/18410	3.86945e-11	8.92122e-10	5.63446e-10	CASP10/MMP1/CASP9/CASP7/ADAMTS4/CASP8/MMP3/HTRA2/CFLAR/CASP3/ADAMTS1/PIDD1/CASP6/UQCRC2/CASP2/USP2/HTRA1/MALT1/MMP9/PARL/MMP13/MMP2/HTRA3/MMP12	24	0.816497
MF	GO:0031593	polyubiquitin modification-dependent protein binding	10/196	53/18410	1.94731e-10	4.25334e-09	2.68632e-09	SQSTM1/VCP/TAB2/IKBKG/HDAC6/OTUD7B/EPS15/OPTN/PSMD4/SHARPIN	10	-1.26491
MF	GO:0097199	cysteine-type endopeptidase activity involved in apoptotic signaling pathway	6/196	10/18410	2.73399e-10	5.67303e-09	3.58297e-09	CASP10/CASP9/CASP8/CFLAR/CASP3/CASP2	6	-1.63299
MF	GO:0070513	death domain binding	6/196	11/18410	5.96159e-10	1.13761e-08	7.18493e-09	BCL2/BCL2L1/TRADD/RIPK1/CRADD/BAX	6	0
MF	GO:0016504	peptidase activator activity	9/196	43/18410	6.03072e-10	1.13761e-08	7.18493e-09	VCP/BAD/ADRM1/PINK1/APAF1/CAV1/CARD8/NOD1/FN1	9	0.333333
MF	GO:0022804	active transmembrane transporter activity	21/196	404/18410	2.30604e-09	4.16089e-08	2.62793e-08	CYB5A/SLC25A6/UQCRH/SLC25A5/SURF1/COX7A2L/TOMM20/COX8A/COX4I1/COX5A/COX7B/CYC1/UQCRC1/COX5B/COX6A1/UQCRFS1/UQCR10/NDUFA4/COX6B1/COX4I2/SLC25A4	21	3.27327
MF	GO:0004674	protein serine/threonine kinase activity	20/196	430/18410	3.64187e-08	6.2974e-07	3.97731e-07	MAP3K5/RIPK3/SQSTM1/TGFBR1/CHUK/IKBKB/PRKCD/BMPR2/MAPK1/PINK1/AKT1/RAF1/MAP3K7/RIPK1/RIPK2/BMPR1A/MAPK3/MAP2K7/TGFBR2/MAP3K14	20	0
MF	GO:0004842	ubiquitin-protein transferase activity	20/196	433/18410	4.08341e-08	6.77846e-07	4.28113e-07	UBE2L6/UBE2D1/UBE2D3/STUB1/FBXO7/BIRC6/TRAF6/XIAP/UBE2G2/UBE2N/RNF41/UBE2L3/UBE2G1/TRAF2/UBE2E2/TRAF3/MALT1/SHARPIN/UBE2D2/BIRC3	20	-1.34164
MF	GO:0031996	thioesterase binding	5/196	11/18410	5.70084e-08	9.09942e-07	5.747e-07	TRAF6/TRAF2/TRAF3/TRAF5/TRAF1	5	1.34164
MF	GO:0008234	cysteine-type peptidase activity	13/196	178/18410	6.02782e-08	9.26498e-07	5.85157e-07	CASP10/CASP9/CASP7/CASP8/CFLAR/OTUD7B/CASP3/USP4/CASP6/ATXN3/CASP2/USP2/MALT1	13	-0.27735
MF	GO:0043130	ubiquitin binding	10/196	96/18410	7.57996e-08	1.12346e-06	7.09553e-07	UBE2L6/SQSTM1/TAB2/FBXO7/IKBKG/ADRM1/UBE2N/HDAC6/HSPB1/SHARPIN	10	-2.52982
MF	GO:0019787	ubiquitin-like protein transferase activity	20/196	458/18410	1.02036e-07	1.46016e-06	9.22209e-07	UBE2L6/UBE2D1/UBE2D3/STUB1/FBXO7/BIRC6/TRAF6/XIAP/UBE2G2/UBE2N/RNF41/UBE2L3/UBE2G1/TRAF2/UBE2E2/TRAF3/MALT1/SHARPIN/UBE2D2/BIRC3	20	-1.34164
MF	GO:0031386	protein tag	5/196	13/18410	1.56078e-07	2.15908e-06	1.36363e-06	UBB/SUMO1/UBC/RPS27A/UBA52	5	-1.34164
MF	GO:0061134	peptidase regulator activity	14/196	230/18410	1.79592e-07	2.40421e-06	1.51845e-06	VCP/BIRC6/XIAP/BAD/ADRM1/PINK1/APAF1/NGF/CAV1/CARD8/NOD1/BIRC5/FN1/BIRC3	14	0.534522
MF	GO:0043028	cysteine-type endopeptidase regulator activity involved in apoptotic process	7/196	40/18410	1.9285e-07	2.50102e-06	1.57959e-06	XIAP/BAD/APAF1/CARD8/NOD1/BIRC5/BIRC3	7	1.13389
MF	GO:0004709	MAP kinase kinase kinase activity	6/196	26/18410	2.60062e-07	3.27048e-06	2.06557e-06	MAP3K5/RAF1/MAP3K7/RIPK1/RIPK2/MAP3K14	6	1.63299
MF	GO:0032182	ubiquitin-like protein binding	10/196	116/18410	4.56007e-07	5.56596e-06	3.51534e-06	UBE2L6/SQSTM1/TAB2/FBXO7/IKBKG/ADRM1/UBE2N/HDAC6/HSPB1/SHARPIN	10	-2.52982
MF	GO:0050700	CARD domain binding	5/196	16/18410	5.16119e-07	6.1197e-06	3.86507e-06	BCL10/NOD2/RIPK2/CARD8/NOD1	5	0.447214
MF	GO:0004197	cysteine-type endopeptidase activity	10/196	120/18410	6.25405e-07	7.20953e-06	4.55339e-06	CASP10/CASP9/CASP7/CASP8/CFLAR/CASP3/CASP6/CASP2/USP2/MALT1	10	-0.632456
MF	GO:0019955	cytokine binding	10/196	141/18410	2.74287e-06	3.07646e-05	1.94303e-05	COMP/TNFRSF1A/TGFBR1/PARK7/BMPR2/TNFRSF1B/TRAF2/BMPR1A/HAX1/TGFBR2	10	-0.632456
MF	GO:0004222	metalloendopeptidase activity	9/196	111/18410	2.8991e-06	3.16612e-05	1.99966e-05	MMP1/ADAMTS4/MMP3/ADAMTS1/UQCRC2/MMP9/MMP13/MMP2/MMP12	9	1
MF	GO:0043422	protein kinase B binding	4/196	11/18410	3.87827e-06	4.12687e-05	2.60645e-05	BCL10/TRAF6/BAD/PINK1	4	-2
MF	GO:0070530	K63-linked polyubiquitin modification-dependent protein binding	5/196	24/18410	4.68609e-06	4.86182e-05	3.07062e-05	SQSTM1/TAB2/IKBKG/OTUD7B/OPTN	5	-1.34164
MF	GO:0019902	phosphatase binding	11/196	193/18410	7.24118e-06	7.32949e-05	4.62915e-05	BCL2/MAP3K5/VCP/AMBRA1/BAD/MAPK1/TRAF2/MAPK3/TRAF3/MAP2K7/FOXO1	11	-0.301511
MF	GO:0005518	collagen binding	7/196	68/18410	7.79768e-06	7.70485e-05	4.86622e-05	COMP/LUM/SMAD7/MMP9/FN1/MMP13/MMP12	7	0.377964
MF	GO:0005024	transforming growth factor beta-activated receptor activity	4/196	13/18410	8.26357e-06	7.9753e-05	5.03703e-05	TGFBR1/BMPR2/BMPR1A/TGFBR2	4	0
MF	GO:0140030	modification-dependent protein binding	10/196	166/18410	1.17265e-05	0.000110602	6.98538e-05	SQSTM1/VCP/TAB2/IKBKG/HDAC6/OTUD7B/EPS15/OPTN/PSMD4/SHARPIN	10	-1.26491
MF	GO:0004252	serine-type endopeptidase activity	10/196	174/18410	1.76734e-05	0.000162988	0.00010294	MMP1/MMP3/HTRA2/HTRA1/MMP9/PARL/MMP13/MMP2/HTRA3/MMP12	10	1.26491
MF	GO:0008656	cysteine-type endopeptidase activator activity involved in apoptotic process	4/196	17/18410	2.66029e-05	0.000234898	0.000148356	BAD/APAF1/CARD8/NOD1	4	1
MF	GO:0031435	mitogen-activated protein kinase kinase kinase binding	4/196	17/18410	2.66029e-05	0.000234898	0.000148356	TRAF6/TRAF2/MAP2K7/TGFBR2	4	1
MF	GO:0019903	protein phosphatase binding	9/196	148/18410	2.99838e-05	0.000259235	0.000163727	BCL2/MAP3K5/VCP/AMBRA1/BAD/TRAF2/TRAF3/MAP2K7/FOXO1	9	-0.333333
MF	GO:0106310	protein serine kinase activity	14/196	360/18410	3.30018e-05	0.000279505	0.00017653	MAP3K5/RIPK3/IKBKB/PRKCD/MAPK1/PINK1/AKT1/RAF1/MAP3K7/RIPK1/RIPK2/MAPK3/MAP2K7/MAP3K14	14	0.534522
MF	GO:0008236	serine-type peptidase activity	10/196	191/18410	3.93379e-05	0.000326504	0.000206213	MMP1/MMP3/HTRA2/HTRA1/MMP9/PARL/MMP13/MMP2/HTRA3/MMP12	10	1.26491
MF	GO:0004675	transmembrane receptor protein serine/threonine kinase activity	4/196	19/18410	4.26076e-05	0.000346709	0.000218974	TGFBR1/BMPR2/BMPR1A/TGFBR2	4	0
MF	GO:0017171	serine hydrolase activity	10/196	195/18410	4.6889e-05	0.000374211	0.000236343	MMP1/MMP3/HTRA2/HTRA1/MMP9/PARL/MMP13/MMP2/HTRA3/MMP12	10	1.26491
MF	GO:0016505	peptidase activator activity involved in apoptotic process	4/196	20/18410	5.28171e-05	0.000413568	0.000261201	BAD/APAF1/CARD8/NOD1	4	1
MF	GO:1990381	ubiquitin-specific protease binding	4/196	21/18410	6.47028e-05	0.000497253	0.000314055	VCP/SUMO1/PARK7/PTEN	4	-2
MF	GO:0008320	protein transmembrane transporter activity	4/196	22/18410	7.84248e-05	0.0005815	0.000367263	TOMM22/TOMM20/TOMM40/TOMM7	4	1
MF	GO:0097110	scaffold protein binding	6/196	67/18410	7.84674e-05	0.0005815	0.000367263	CASP8/HSP90AA1/CHUK/IKBKB/PARK7/MAP3K7	6	-1.63299
MF	GO:0005160	transforming growth factor beta receptor binding	4/196	24/18410	0.00011204	0.000815728	0.000515197	TGFBR1/SMAD7/TGFB1/TGFBR2	4	0
MF	GO:0005031	tumor necrosis factor-activated receptor activity	3/196	10/18410	0.000134964	0.000933499	0.000589579	TNFRSF1A/FAS/TNFRSF1B	3	-1.73205
MF	GO:0017002	activin-activated receptor activity	3/196	10/18410	0.000134964	0.000933499	0.000589579	TGFBR1/BMPR2/TGFBR2	3	-0.57735
MF	GO:0034713	type I transforming growth factor beta receptor binding	3/196	10/18410	0.000134964	0.000933499	0.000589579	SMAD7/TGFB1/TGFBR2	3	0.57735
MF	GO:0019209	kinase activator activity	7/196	110/18410	0.000175773	0.00115773	0.000731197	BCL10/DDX3X/BMP2/BMPR2/TAB1/BMPR1A/MALT1	7	-1.13389
MF	GO:0022884	macromolecule transmembrane transporter activity	4/196	27/18410	0.000180482	0.00115773	0.000731197	TOMM22/TOMM20/TOMM40/TOMM7	4	1
MF	GO:0046332	SMAD binding	6/196	78/18410	0.000183325	0.00115773	0.000731197	TGFBR1/BMP2/STUB1/SMAD7/BMPR1A/TGFBR2	6	-0.816497
MF	GO:0004706	JUN kinase kinase kinase activity	3/196	11/18410	0.000184121	0.00115773	0.000731197	MAP3K5/RIPK1/RIPK2	3	0.57735
MF	GO:0005347	ATP transmembrane transporter activity	3/196	11/18410	0.000184121	0.00115773	0.000731197	SLC25A6/SLC25A5/SLC25A4	3	0.57735
MF	GO:1990459	transferrin receptor binding	3/196	11/18410	0.000184121	0.00115773	0.000731197	CHUK/IKBKB/IKBKG	3	-1.73205
MF	GO:0008237	metallopeptidase activity	9/196	189/18410	0.000196923	0.00121974	0.000770365	MMP1/ADAMTS4/MMP3/ADAMTS1/UQCRC2/MMP9/MMP13/MMP2/MMP12	9	1
MF	GO:0022829	wide pore channel activity	4/196	30/18410	0.000274884	0.0016776	0.00105954	VDAC3/VDAC2/VDAC1/TOMM40	4	1
MF	GO:0140318	protein transporter activity	4/196	31/18410	0.000312996	0.00183631	0.00115977	TOMM22/TOMM20/TOMM40/TOMM7	4	1
MF	GO:0004712	protein serine/threonine/tyrosine kinase activity	14/196	446/18410	0.000313712	0.00183631	0.00115977	MAP3K5/RIPK3/IKBKB/PRKCD/MAPK1/PINK1/AKT1/RAF1/MAP3K7/RIPK1/RIPK2/MAPK3/MAP2K7/MAP3K14	14	0.534522
MF	GO:0005035	death receptor activity	3/196	13/18410	0.000314164	0.00183631	0.00115977	TNFRSF1A/FAS/TNFRSF1B	3	-1.73205
MF	GO:0005507	copper ion binding	5/196	61/18410	0.000476837	0.00274843	0.00173585	PARK7/SCO1/COMMD1/COX11/IL1A	5	1.34164
MF	GO:0004707	MAP kinase activity	3/196	15/18410	0.000492016	0.00275928	0.0017427	MAPK1/MAP3K7/MAPK3	3	0.57735
MF	GO:0048185	activin binding	3/196	15/18410	0.000492016	0.00275928	0.0017427	TGFBR1/SMAD7/TGFBR2	3	-0.57735
MF	GO:0008308	voltage-gated anion channel activity	3/196	17/18410	0.000723872	0.00395272	0.00249646	VDAC3/VDAC2/VDAC1	3	0.57735
MF	GO:0036122	BMP binding	3/196	17/18410	0.000723872	0.00395272	0.00249646	COMP/BMPR2/BMPR1A	3	-0.57735
MF	GO:0000295	adenine nucleotide transmembrane transporter activity	3/196	18/18410	0.000861863	0.00452751	0.00285948	SLC25A6/SLC25A5/SLC25A4	3	0.57735
MF	GO:0004708	MAP kinase kinase activity	3/196	18/18410	0.000861863	0.00452751	0.00285948	MAPK1/MAPK3/MAP2K7	3	0.57735
MF	GO:0005346	purine ribonucleotide transmembrane transporter activity	3/196	18/18410	0.000861863	0.00452751	0.00285948	SLC25A6/SLC25A5/SLC25A4	3	0.57735
MF	GO:0019207	kinase regulator activity	9/196	235/18410	0.00095743	0.00496667	0.00313684	BCL10/DDX3X/BMP2/BMPR2/HSPB1/CASP3/TAB1/BMPR1A/MALT1	9	-1.66667
MF	GO:0048156	tau protein binding	4/196	43/18410	0.00111132	0.0056938	0.00359609	HSP90AA1/STUB1/HDAC6/PPP2CA	4	-1
MF	GO:1990782	protein tyrosine kinase binding	6/196	113/18410	0.00132689	0.00671535	0.00424127	SQSTM1/HSP90AA1/BMPR2/TRADD/RNF41/MAP3K7	6	-1.63299
MF	GO:0015216	purine nucleotide transmembrane transporter activity	3/196	21/18410	0.00137213	0.00686064	0.00433304	SLC25A6/SLC25A5/SLC25A4	3	0.57735
MF	GO:0030021	extracellular matrix structural constituent conferring compression resistance	3/196	22/18410	0.0015764	0.00769653	0.00486097	LUM/PRELP/FMOD	3	0.57735
MF	GO:0043027	cysteine-type endopeptidase inhibitor activity involved in apoptotic process	3/196	22/18410	0.0015764	0.00769653	0.00486097	XIAP/BIRC5/BIRC3	3	0.57735
MF	GO:0019211	phosphatase activator activity	3/196	23/18410	0.00179873	0.00867994	0.00548207	BMP2/BMPR2/BMPR1A	3	-0.57735
MF	GO:0051537	2 iron, 2 sulfur cluster binding	3/196	24/18410	0.00203969	0.0096446	0.00609132	FDX1/SDHB/UQCRFS1	3	0.57735
MF	GO:0031072	heat shock protein binding	6/196	123/18410	0.00204512	0.0096446	0.00609132	BAK1/STUB1/HDAC6/NOD2/APAF1/BAX	6	-0.816497
MF	GO:0043539	protein serine/threonine kinase activator activity	4/196	53/18410	0.0024278	0.0113206	0.00714988	DDX3X/BMP2/BMPR2/BMPR1A	4	-1
MF	GO:0038187	pattern recognition receptor activity	3/196	26/18410	0.00257955	0.0118946	0.00751236	NOD2/CARD8/NOD1	3	0.57735
MF	GO:0015215	nucleotide transmembrane transporter activity	3/196	27/18410	0.00287943	0.0131315	0.00829355	SLC25A6/SLC25A5/SLC25A4	3	0.57735
MF	GO:0004869	cysteine-type endopeptidase inhibitor activity	4/196	56/18410	0.0029708	0.0134009	0.00846371	BIRC6/XIAP/BIRC5/BIRC3	4	0
MF	GO:0046982	protein heterodimerization activity	10/196	332/18410	0.00303079	0.0135245	0.00854179	BAK1/BCL2/BCL2L1/CHUK/IKBKB/FBXO7/IKBKG/CAV1/PPP2CA/BAX	10	-1.26491
MF	GO:0046625	sphingolipid binding	3/196	29/18410	0.0035414	0.0156349	0.00987469	TRAF2/VDAC2/VDAC1	3	1.73205
MF	GO:0140678	molecular function inhibitor activity	4/196	59/18410	0.00359141	0.0156888	0.00990872	BCL2/SMAD7/CAV1/COMMD1	4	0
MF	GO:0015605	organophosphate ester transmembrane transporter activity	3/196	32/18410	0.00469614	0.020301	0.0128217	SLC25A6/SLC25A5/SLC25A4	3	0.57735
MF	GO:0061135	endopeptidase regulator activity	7/196	194/18410	0.00482084	0.0206253	0.0130265	BIRC6/XIAP/ADRM1/NGF/CARD8/BIRC5/BIRC3	7	0.377964
MF	GO:0016248	channel inhibitor activity	3/196	33/18410	0.00512572	0.0217059	0.013709	BCL2/CAV1/COMMD1	3	0.57735
MF	GO:0051087	chaperone binding	5/196	106/18410	0.00553248	0.0231917	0.0146474	BAK1/STUB1/BIRC5/BAX/FN1	5	0.447214
MF	GO:0043394	proteoglycan binding	3/196	36/18410	0.0065532	0.0271958	0.0171763	COMP/FN1/TNC	3	0.57735
MF	GO:0061133	endopeptidase activator activity	2/196	13/18410	0.00814257	0.0331291	0.0209236	ADRM1/CARD8	2	0
MF	GO:0089720	caspase binding	2/196	13/18410	0.00814257	0.0331291	0.0209236	FADD/RIPK2	2	0
MF	GO:0030971	receptor tyrosine kinase binding	4/196	76/18410	0.00880574	0.0354794	0.0224081	SQSTM1/TRADD/RNF41/MAP3K7	4	-1
MF	GO:0048487	beta-tubulin binding	3/196	41/18410	0.00941177	0.037285	0.0235484	HDAC6/LRPPRC/SYT11	3	0.57735
MF	GO:0070411	I-SMAD binding	2/196	14/18410	0.00943355	0.037285	0.0235484	TGFBR1/SMAD7	2	-1.41421
MF	GO:0019199	transmembrane receptor protein kinase activity	4/196	79/18410	0.0100626	0.039396	0.0248817	TGFBR1/BMPR2/BMPR1A/TGFBR2	4	0
MF	GO:0005201	extracellular matrix structural constituent	6/196	172/18410	0.0103568	0.0401691	0.0253699	COMP/LUM/PRELP/FN1/FMOD/TNC	6	0.816497
MF	GO:0051879	Hsp90 protein binding	3/196	43/18410	0.0107285	0.0412254	0.0260371	STUB1/HDAC6/NOD2	3	-1.73205
MF	GO:0030544	Hsp70 protein binding	3/196	44/18410	0.0114248	0.0434983	0.0274726	STUB1/NOD2/BAX	3	-0.57735
MF	GO:0034979	NAD-dependent protein deacetylase activity	2/196	16/18410	0.0122675	0.045865	0.0289674	HDAC6/SIRT5	2	-1.41421
MF	GO:1990380	Lys48-specific deubiquitinase activity	2/196	16/18410	0.0122675	0.045865	0.0289674	OTUD7B/ATXN3	2	0
MF	GO:0005539	glycosaminoglycan binding	7/196	234/18410	0.0128381	0.0475699	0.0300441	COMP/NOD2/ADAMTS1/NOD1/PRELP/TGFBR2/FN1	7	1.13389
MF	GO:0008013	beta-catenin binding	4/196	86/18410	0.0134322	0.0493307	0.0311562	HDAC6/SMAD7/FOXO3/FOXO1	4	0
MF	GO:0051020	GTPase binding	8/196	298/18410	0.0147241	0.0536008	0.0338531	HSP90AA1/AMBRA1/RNF41/BECN1/OPTN/CAV1/BIRC5/DNM1L	8	0.707107
MF	GO:0042834	peptidoglycan binding	2/196	18/18410	0.0154248	0.0556632	0.0351557	NOD2/NOD1	2	0
MF	GO:0015485	cholesterol binding	3/196	50/18410	0.0161425	0.0572576	0.0361627	VDAC2/CAV1/VDAC1	3	1.73205
MF	GO:0015932	nucleobase-containing compound transmembrane transporter activity	3/196	50/18410	0.0161425	0.0572576	0.0361627	SLC25A6/SLC25A5/SLC25A4	3	0.57735
MF	GO:0019838	growth factor binding	5/196	139/18410	0.0166101	0.0577556	0.0364772	TGFBR1/HTRA1/HAX1/TGFBR2/HTRA3	5	1.34164
MF	GO:0020037	heme binding	5/196	139/18410	0.0166101	0.0577556	0.0364772	CYB5A/HCCS/CAT/CYC1/CYCS	5	-0.447214
MF	GO:0030674	protein-macromolecule adaptor activity	8/196	305/18410	0.0167004	0.0577556	0.0364772	STUB1/FBXO7/AMBRA1/TRADD/TRAF2/OPTN/CRADD/CAV1	8	0
MF	GO:0016247	channel regulator activity	5/196	143/18410	0.018547	0.0632222	0.0399298	BCL2/SUMO1/AKT1/CAV1/COMMD1	5	0.447214
MF	GO:1901505	carbohydrate derivative transmembrane transporter activity	3/196	53/18410	0.0188529	0.0632222	0.0399298	SLC25A6/SLC25A5/SLC25A4	3	0.57735
MF	GO:0070300	phosphatidic acid binding	2/196	20/18410	0.0188905	0.0632222	0.0399298	COMMD1/OPA1	2	1.41421
MF	GO:0097001	ceramide binding	2/196	20/18410	0.0188905	0.0632222	0.0399298	VDAC2/VDAC1	2	1.41421
MF	GO:0015459	potassium channel regulator activity	3/196	54/18410	0.019809	0.0657658	0.0415363	SUMO1/AKT1/CAV1	3	0.57735
MF	GO:0061630	ubiquitin protein ligase activity	8/196	316/18410	0.0201831	0.066476	0.0419848	UBE2D1/UBE2D3/STUB1/TRAF6/XIAP/RNF41/UBE2D2/BIRC3	8	-1.41421
MF	GO:0060090	molecular adaptor activity	9/196	379/18410	0.0205403	0.0671199	0.0423915	STUB1/FBXO7/AMBRA1/TRADD/TRAF2/OPTN/CRADD/AIMP2/CAV1	9	0.333333
MF	GO:0033558	protein lysine deacetylase activity	2/196	21/18410	0.0207345	0.0672252	0.042458	HDAC6/SIRT5	2	-1.41421
MF	GO:0046906	tetrapyrrole binding	5/196	149/18410	0.0217223	0.0698817	0.0441358	CYB5A/HCCS/CAT/CYC1/CYCS	5	-0.447214
MF	GO:0005496	steroid binding	4/196	100/18410	0.0221352	0.0706622	0.0446288	ESRRA/VDAC2/CAV1/VDAC1	4	1
MF	GO:0019887	protein kinase regulator activity	6/196	207/18410	0.0236389	0.0748866	0.0472968	DDX3X/BMP2/BMPR2/HSPB1/CASP3/BMPR1A	6	-1.63299
MF	GO:0010857	calcium-dependent protein kinase activity	2/196	23/18410	0.0246362	0.0774547	0.0489187	PRKCD/PINK1	2	-1.41421
MF	GO:0061659	ubiquitin-like protein ligase activity	8/196	329/18410	0.0249322	0.0777961	0.0491344	UBE2D1/UBE2D3/STUB1/TRAF6/XIAP/RNF41/UBE2D2/BIRC3	8	-1.41421
MF	GO:0030295	protein kinase activator activity	4/196	104/18410	0.0251287	0.0778239	0.0491519	DDX3X/BMP2/BMPR2/BMPR1A	4	-1
MF	GO:0032934	sterol binding	3/196	60/18410	0.0260984	0.0802284	0.0506706	VDAC2/CAV1/VDAC1	3	1.73205
MF	GO:0050431	transforming growth factor beta binding	2/196	24/18410	0.0266904	0.0809177	0.0511059	TGFBR1/TGFBR2	2	0
MF	GO:0004843	cysteine-type deubiquitinase activity	4/196	106/18410	0.0267126	0.0809177	0.0511059	OTUD7B/USP4/ATXN3/USP2	4	1
MF	GO:0019208	phosphatase regulator activity	4/196	111/18410	0.0309294	0.0930123	0.0587446	BMP2/PPP1R15B/BMPR2/BMPR1A	4	-1
MF	GO:0101005	deubiquitinase activity	4/196	113/18410	0.0327197	0.0976884	0.0616979	OTUD7B/USP4/ATXN3/USP2	4	1
MF	GO:0004190	aspartic-type endopeptidase activity	2/196	27/18410	0.0332468	0.0985529	0.0622439	CASP7/CASP3	2	-1.41421
KEGG	hsa05022	Pathways of neurodegeneration - multiple diseases	79/170	476/8164	3.01105e-53	6.23288e-51	2.50393e-51	BAK1/BCL2/CASP9/SLC25A6/CASP7/MAP3K5/FADD/UBE2L6/SQSTM1/CASP8/TNF/TNFRSF1A/BID/BCL2L1/CAT/VCP/UBB/FAS/UQCRH/UQCR11/AMBRA1/RELA/HTRA2/BAD/VDAC3/UBE2G2/MFN2/ADRM1/PARK7/UBC/RPS27A/TNFRSF1B/CASP3/UBE2L3/MAPK1/PINK1/UBE2G1/RAF1/BECN1/SLC25A5/PPIF/TARDBP/COX7A2L/TRAF2/OPTN/VDAC2/APAF1/SDHB/MAPK3/UQCRC2/ATXN3/UBA52/COX8A/MFN1/MAP2K7/COX4I1/PSMD4/UQCRHL/COX5A/COX7B/CYC1/UQCRC1/COX5B/CYCS/COX6A1/UQCRFS1/…	79	0.562544
KEGG	hsa05012	Parkinson disease	52/170	266/8164	2.27117e-37	2.35067e-35	9.44331e-36	CASP9/SLC25A6/MAP3K5/UBE2L6/BCL2L1/UBB/UQCRH/UQCR11/HTRA2/VDAC3/UBE2G2/MFN2/ADRM1/PARK7/UBC/RPS27A/CASP3/UBE2L3/PINK1/UBE2G1/SLC25A5/PPIF/COX7A2L/VDAC2/APAF1/SDHB/UQCRC2/UBA52/COX8A/MFN1/COX4I1/PSMD4/UQCRHL/COX5A/COX7B/CYC1/UQCRC1/COX5B/CYCS/COX6A1/UQCRFS1/COX7C/UQCRB/VDAC1/UQCR10/BAX/UQCRQ/NDUFA4/COX6B1/COX4I2/COX6C/SLC25A4	52	1.6641
KEGG	hsa04210	Apoptosis	40/170	136/8164	4.08666e-36	2.8198e-34	1.13279e-34	CASP10/BAK1/BCL2/CASP9/CASP7/MAP3K5/FADD/CASP8/TNF/TNFRSF1A/BID/BCL2L1/CHUK/FAS/IKBKB/XIAP/RELA/IKBKG/HTRA2/BAD/CFLAR/TRADD/CASP3/MAPK1/AKT1/RAF1/RIPK1/TRAF2/PIDD1/CASP6/APAF1/NGF/MAPK3/CASP2/CYCS/BIRC5/TRAF1/BAX/MAP3K14/BIRC3	40	-1.26491
KEGG	hsa05010	Alzheimer disease	58/170	384/8164	2.17954e-35	1.12791e-33	4.53116e-34	CASP9/SLC25A6/CASP7/MAP3K5/FADD/CASP8/TNF/TNFRSF1A/BID/CHUK/FAS/IKBKB/UQCRH/UQCR11/AMBRA1/RELA/IKBKG/BAD/VDAC3/ADRM1/CASP3/MAPK1/AKT1/RAF1/BECN1/SLC25A5/PPIF/COX7A2L/TRAF2/VDAC2/APAF1/SDHB/MAPK3/UQCRC2/COX8A/MAP2K7/COX4I1/PSMD4/UQCRHL/COX5A/COX7B/CYC1/UQCRC1/COX5B/CYCS/COX6A1/UQCRFS1/IL1A/COX7C/UQCRB/VDAC1/UQCR10/UQCRQ/NDUFA4/COX6B1/COX4I2/COX6C/SLC25A4	58	1.83829
KEGG	hsa04668	TNF signaling pathway	36/170	112/8164	4.78545e-34	1.86821e-32	7.50513e-33	CASP10/CASP7/MAP3K5/FADD/RIPK3/CASP8/MMP3/TNF/TNFRSF1A/PGAM5/TAB2/CHUK/FAS/IKBKB/RELA/IKBKG/CFLAR/TRADD/TNFRSF1B/CASP3/TAB1/NOD2/MAPK1/AKT1/MAP3K7/RIPK1/TRAF2/MAPK3/TRAF3/TRAF5/MAP2K7/MMP9/TRAF1/DNM1L/MAP3K14/BIRC3	36	-1.66667
KEGG	hsa05208	Chemical carcinogenesis - reactive oxygen species	46/170	223/8164	5.41509e-34	1.86821e-32	7.50513e-33	SLC25A6/MAP3K5/CAT/CHUK/IKBKB/UQCRH/UQCR11/RELA/IKBKG/PRKCD/BAD/VDAC3/PTEN/MAPK1/AKT1/RAF1/SLC25A5/PPIF/COX7A2L/VDAC2/SDHB/MAPK3/FOXO3/UQCRC2/COX8A/MAP2K7/COX4I1/UQCRHL/COX5A/COX7B/CYC1/UQCRC1/COX5B/COX6A1/UQCRFS1/COX7C/UQCRB/VDAC1/UQCR10/MAP3K14/UQCRQ/NDUFA4/COX6B1/COX4I2/COX6C/SLC25A4	46	2.65396
KEGG	hsa04932	Non-alcoholic fatty liver disease	39/170	155/8164	2.78487e-32	8.23525e-31	3.30834e-31	CASP7/MAP3K5/CASP8/TNF/TNFRSF1A/BID/FAS/IKBKB/UQCRH/UQCR11/RELA/CASP3/AKT1/TGFB1/COX7A2L/TRAF2/SDHB/UQCRC2/COX8A/COX4I1/UQCRHL/COX5A/COX7B/CYC1/UQCRC1/COX5B/CYCS/COX6A1/UQCRFS1/IL1A/COX7C/UQCRB/UQCR10/BAX/UQCRQ/NDUFA4/COX6B1/COX4I2/COX6C	39	2.40192
KEGG	hsa05014	Amyotrophic lateral sclerosis	50/170	364/8164	3.28236e-28	8.4931e-27	3.41192e-27	BCL2/CASP9/MAP3K5/SQSTM1/TNF/TNFRSF1A/BID/BCL2L1/CAT/VCP/UQCRH/UQCR11/AMBRA1/BAD/ADRM1/HDAC6/TNFRSF1B/CASP3/PINK1/BECN1/TARDBP/COX7A2L/TRAF2/OPTN/APAF1/SDHB/UQCRC2/COX8A/COX4I1/PSMD4/UQCRHL/COX5A/COX7B/CYC1/UQCRC1/COX5B/CYCS/COX6A1/UQCRFS1/COX7C/UQCRB/VDAC1/TOMM40/UQCR10/BAX/UQCRQ/NDUFA4/COX6B1/COX4I2/COX6C	50	1.69706
KEGG	hsa05161	Hepatitis B	36/170	162/8164	1.04603e-27	2.30398e-26	9.25575e-27	CASP10/BCL2/CASP9/FADD/TICAM1/DDX3X/CASP8/TNF/BID/TGFBR1/TAB2/CHUK/TLR3/FAS/IKBKB/TRAF6/RELA/IKBKG/BAD/VDAC3/CASP3/TAB1/MAPK1/AKT1/RAF1/MAP3K7/TGFB1/APAF1/MAPK3/TRAF3/MAP2K7/CYCS/MMP9/BIRC5/TGFBR2/BAX	36	-1.66667
KEGG	hsa05020	Prion disease	44/170	273/8164	1.11303e-27	2.30398e-26	9.25575e-27	CASP9/SLC25A6/TNF/UQCRH/UQCR11/PRKCD/BAD/VDAC3/ADRM1/CASP3/MAPK1/SLC25A5/PPIF/COX7A2L/VDAC2/APAF1/SDHB/MAPK3/CAV1/UQCRC2/COX8A/COX4I1/PSMD4/UQCRHL/COX5A/COX7B/CYC1/UQCRC1/COX5B/CYCS/COX6A1/UQCRFS1/IL1A/COX7C/UQCRB/VDAC1/UQCR10/BAX/UQCRQ/NDUFA4/COX6B1/COX4I2/COX6C/SLC25A4	44	3.31662
KEGG	hsa05415	Diabetic cardiomyopathy	39/170	203/8164	1.80214e-27	3.39129e-26	1.36238e-26	SLC25A6/TGFBR1/UQCRH/UQCR11/RELA/PRKCD/VDAC3/PTEN/AKT1/SLC25A5/PPIF/TGFB1/COX7A2L/VDAC2/SDHB/UQCRC2/COX8A/COX4I1/UQCRHL/COX5A/COX7B/CYC1/UQCRC1/COX5B/MMP9/COX6A1/TGFBR2/UQCRFS1/COX7C/UQCRB/VDAC1/UQCR10/UQCRQ/NDUFA4/COX6B1/MMP2/COX4I2/COX6C/SLC25A4	39	3.68295
KEGG	hsa05131	Shigellosis	42/170	247/8164	2.30367e-27	3.97383e-26	1.5964e-26	BCL2/BCL10/SQSTM1/TNF/TNFRSF1A/BCL2L1/CALCOCO2/UBE2D1/TAB2/UBE2D3/CHUK/UBB/IKBKB/TRAF6/RELA/IKBKG/PRKCD/UBE2N/TRADD/UBC/RPS27A/TAB1/MAPK1/AKT1/BECN1/MAP3K7/RIPK1/TRAF2/RIPK2/MAPK3/CTTN/NOD1/FOXO3/TRAF5/UBA52/CYCS/MALT1/SHARPIN/FOXO1/UBE2D2/VDAC1/BAX	42	-0.617213
KEGG	hsa04621	NOD-like receptor signaling pathway	36/170	184/8164	1.22591e-25	1.95202e-24	7.84184e-25	BCL2/FADD/RIPK3/TICAM1/CASP8/TNF/BCL2L1/HSP90AA1/TAB2/CHUK/IKBKB/TRAF6/XIAP/RELA/IKBKG/PRKCD/VDAC3/MFN2/TAB1/NOD2/MAPK1/MAP3K7/RIPK1/TRAF2/RIPK2/VDAC2/MAPK3/CARD8/TRAF3/NOD1/TRAF5/MFN1/SHARPIN/DNM1L/VDAC1/BIRC3	36	-1
KEGG	hsa05016	Huntington disease	44/170	306/8164	1.52217e-25	2.25063e-24	9.04144e-25	CASP9/SLC25A6/MAP3K5/CASP8/UQCRH/UQCR11/AMBRA1/VDAC3/ADRM1/CASP3/BECN1/SLC25A5/PPIF/COX7A2L/TRAF2/VDAC2/APAF1/SDHB/NRF1/UQCRC2/COX8A/MAP2K7/COX4I1/PSMD4/UQCRHL/COX5A/COX7B/CYC1/UQCRC1/COX5B/CYCS/COX6A1/UQCRFS1/COX7C/UQCRB/VDAC1/UQCR10/BAX/UQCRQ/NDUFA4/COX6B1/COX4I2/COX6C/SLC25A4	44	3.61814
KEGG	hsa04215	Apoptosis - multiple species	19/170	32/8164	1.11761e-24	1.5423e-23	6.19588e-24	BAK1/BCL2/CASP9/CASP7/FADD/CASP8/TNFRSF1A/BID/BCL2L1/BIRC6/XIAP/HTRA2/CASP3/BECN1/APAF1/CYCS/BIRC5/BAX/BIRC3	19	-1.60591
KEGG	hsa05417	Lipid and atherosclerosis	37/170	215/8164	2.90051e-24	3.75254e-23	1.5075e-23	MMP1/BCL2/CASP9/CASP7/MAP3K5/TICAM1/CASP8/MMP3/TNF/TNFRSF1A/BID/BCL2L1/HSP90AA1/CD40/TAB2/CHUK/FAS/IKBKB/TRAF6/RELA/IKBKG/BAD/CASP3/TAB1/MAPK1/AKT1/MAP3K7/TRAF2/CASP6/APAF1/MAPK3/TRAF3/MAP2K7/HSPA4/CYCS/MMP9/BAX	37	-2.13719
KEGG	hsa04064	NF-kappa B signaling pathway	27/170	104/8164	8.17283e-23	9.95162e-22	3.99785e-22	BCL2/BCL10/TICAM1/TNF/TNFRSF1A/BCL2L1/CD40/TAB2/CHUK/IKBKB/TRAF6/XIAP/RELA/IKBKG/CFLAR/TRADD/TAB1/MAP3K7/RIPK1/TRAF2/PIDD1/TRAF3/TRAF5/MALT1/TRAF1/MAP3K14/BIRC3	27	-1.34715
KEGG	hsa05160	Hepatitis C	30/170	157/8164	4.28577e-21	4.92863e-20	1.97997e-20	BAK1/CASP9/FADD/TICAM1/CASP8/TNF/TNFRSF1A/BID/CHUK/TLR3/FAS/IKBKB/TRAF6/RELA/IKBKG/BAD/CFLAR/TRADD/CASP3/MAPK1/AKT1/RAF1/RIPK1/TRAF2/APAF1/MAPK3/TRAF3/PPP2CA/CYCS/BAX	30	-1.82574
KEGG	hsa04217	Necroptosis	30/170	159/8164	6.30237e-21	6.86627e-20	2.75838e-20	BCL2/SLC25A6/FADD/RIPK3/SQSTM1/TICAM1/CASP8/TNF/TNFRSF1A/BID/HSP90AA1/PGAM5/TLR3/FAS/XIAP/VDAC3/CFLAR/TRADD/SLC25A5/RIPK1/TRAF2/VDAC2/TRAF5/SHARPIN/DNM1L/IL1A/VDAC1/BAX/BIRC3/SLC25A4	30	-1.09545
KEGG	hsa05164	Influenza A	30/170	171/8164	5.67059e-20	5.86906e-19	2.35777e-19	BAK1/CASP9/SLC25A6/FADD/TICAM1/CASP8/TNF/TNFRSF1A/BID/CALCOCO2/CHUK/TLR3/FAS/IKBKB/RELA/IKBKG/TRADD/CASP3/MAPK1/AKT1/RAF1/SLC25A5/APAF1/MAPK3/TRAF3/CYCS/IL1A/VDAC1/BAX/SLC25A4	30	-1.46059
KEGG	hsa05145	Toxoplasmosis	25/170	112/8164	1.99086e-19	1.96242e-18	7.88361e-19	BCL2/CASP9/CASP8/TNF/TNFRSF1A/BCL2L1/CD40/TAB2/CHUK/IKBKB/TRAF6/XIAP/RELA/IKBKG/BAD/CASP3/TAB1/MAPK1/AKT1/MAP3K7/PPIF/TGFB1/MAPK3/CYCS/BIRC3	25	-2.2
KEGG	hsa05170	Human immunodeficiency virus 1 infection	32/170	212/8164	3.22938e-19	3.03856e-18	1.22068e-18	BAK1/BCL2/CASP9/FADD/CASP8/TNF/TNFRSF1A/BID/BCL2L1/TAB2/CHUK/FAS/IKBKB/TRAF6/RELA/IKBKG/BAD/TRADD/TNFRSF1B/CASP3/TAB1/MAPK1/AKT1/RAF1/MAP3K7/RIPK1/TRAF2/MAPK3/TRAF5/MAP2K7/CYCS/BAX	32	-2.12132
KEGG	hsa05169	Epstein-Barr virus infection	31/170	202/8164	7.57576e-19	6.81819e-18	2.73906e-18	BAK1/BCL2/CASP9/FADD/CASP8/TNF/BID/CD40/TAB2/CHUK/FAS/IKBKB/TRAF6/RELA/IKBKG/ADRM1/TRADD/CASP3/TAB1/AKT1/MAP3K7/RIPK1/TRAF2/APAF1/TRAF3/TRAF5/MAP2K7/PSMD4/CYCS/BAX/MAP3K14	31	-1.25724
KEGG	hsa05222	Small cell lung cancer	22/170	92/8164	6.83006e-18	5.89092e-17	2.36655e-17	BAK1/BCL2/CASP9/BCL2L1/CHUK/IKBKB/TRAF6/XIAP/RELA/IKBKG/PTEN/CASP3/AKT1/TRAF2/APAF1/TRAF3/TRAF5/CYCS/TRAF1/BAX/FN1/BIRC3	22	-0.426401
KEGG	hsa04137	Mitophagy - animal	20/170	72/8164	9.32679e-18	7.72258e-17	3.10238e-17	SQSTM1/BCL2L1/PGAM5/CALCOCO2/UBB/AMBRA1/RELA/MFN2/RHOT2/UBC/RPS27A/PINK1/BECN1/OPTN/RHOT1/FOXO3/UBA52/MFN1/FIS1/TOMM7	20	-0.894427
KEGG	hsa04657	IL-17 signaling pathway	22/170	94/8164	1.12751e-17	8.9767e-17	3.6062e-17	MMP1/FADD/CASP8/MMP3/TNF/HSP90AA1/TAB2/CHUK/IKBKB/TRAF6/RELA/IKBKG/TRADD/CASP3/MAPK1/MAP3K7/TRAF2/MAPK3/TRAF3/TRAF5/MMP9/MMP13	22	-1.70561
KEGG	hsa01524	Platinum drug resistance	20/170	73/8164	1.26201e-17	9.67542e-17	3.8869e-17	BAK1/BCL2/CASP9/MAP3K5/FADD/CASP8/BID/BCL2L1/FAS/XIAP/BAD/CASP3/MAPK1/AKT1/APAF1/MAPK3/CYCS/BIRC5/BAX/BIRC3	20	-1.34164
KEGG	hsa00190	Oxidative phosphorylation	25/170	134/8164	1.99895e-17	1.4778e-16	5.93673e-17	UQCRH/UQCR11/COX7A2L/SDHB/UQCRC2/COX8A/COX4I1/COX11/UQCRHL/COX5A/COX7B/CYC1/UQCRC1/COX5B/CYCS/COX6A1/UQCRFS1/COX7C/UQCRB/UQCR10/UQCRQ/NDUFA4/COX6B1/COX4I2/COX6C	25	4.2
KEGG	hsa05167	Kaposi sarcoma-associated herpesvirus infection	29/170	194/8164	2.40356e-17	1.71564e-16	6.89224e-17	BAK1/CASP9/FADD/TICAM1/CASP8/TNFRSF1A/BID/CHUK/UBB/TLR3/FAS/IKBKB/RELA/IKBKG/TRADD/UBC/RPS27A/CASP3/MAPK1/AKT1/RAF1/BECN1/TRAF2/MAPK3/TRAF3/UBA52/MAP2K7/CYCS/BAX	29	-1.67126
KEGG	hsa04260	Cardiac muscle contraction	21/170	87/8164	3.26903e-17	2.25563e-16	9.06152e-17	UQCRH/UQCR11/COX7A2L/UQCRC2/COX8A/COX4I1/UQCRHL/COX5A/COX7B/CYC1/UQCRC1/COX5B/COX6A1/UQCRFS1/COX7C/UQCRB/UQCR10/UQCRQ/COX6B1/COX4I2/COX6C	21	3.7097
KEGG	hsa05132	Salmonella infection	31/170	249/8164	3.59742e-16	2.40215e-15	9.65014e-16	BAK1/BCL2/CASP7/FADD/RIPK3/CASP8/TNF/TNFRSF1A/HSP90AA1/TAB2/CHUK/IKBKB/TRAF6/RELA/IKBKG/TRADD/CASP3/TAB1/MAPK1/AKT1/RAF1/MAP3K7/RIPK1/TRAF2/RIPK2/MAPK3/NOD1/MAP2K7/CYCS/BAX/BIRC3	31	-1.25724
KEGG	hsa05162	Measles	24/170	139/8164	5.91585e-16	3.82681e-15	1.53734e-15	BAK1/BCL2/CASP9/FADD/CASP8/BID/BCL2L1/TAB2/CHUK/FAS/IKBKB/TRAF6/RELA/IKBKG/BAD/TRADD/CASP3/AKT1/MAP3K7/APAF1/TRAF3/CYCS/IL1A/BAX	24	-2.04124
KEGG	hsa04936	Alcoholic liver disease	24/170	142/8164	9.82344e-16	6.16198e-15	2.47544e-15	MAP3K5/FADD/TICAM1/CASP8/TNF/TNFRSF1A/TAB2/CHUK/FAS/IKBKB/TRAF6/RELA/IKBKG/TRADD/CASP3/TAB1/AKT1/MAP3K7/RIPK1/TRAF3/FOXO3/MAP2K7/FOXO1/MAP3K14	24	-1.63299
KEGG	hsa05152	Tuberculosis	26/170	180/8164	2.97835e-15	1.81329e-14	7.28451e-15	CASP10/BCL2/CASP9/FADD/BCL10/CASP8/TNF/TNFRSF1A/BID/TRAF6/RELA/BAD/TRADD/CASP3/NOD2/MAPK1/AKT1/RAF1/TGFB1/RIPK2/APAF1/MAPK3/CYCS/MALT1/IL1A/BAX	26	-1.1767
KEGG	hsa04620	Toll-like receptor signaling pathway	20/170	104/8164	2.16076e-14	1.27794e-13	5.13385e-14	FADD/TICAM1/CASP8/TNF/CD40/TAB2/CHUK/TLR3/IKBKB/TRAF6/RELA/IKBKG/TAB1/MAPK1/AKT1/MAP3K7/RIPK1/MAPK3/TRAF3/MAP2K7	20	-1.78885
KEGG	hsa04380	Osteoclast differentiation	21/170	128/8164	1.28256e-13	7.3747e-13	2.96263e-13	SQSTM1/TNF/TNFRSF1A/TGFBR1/TAB2/CHUK/IKBKB/TRAF6/RELA/IKBKG/TAB1/MAPK1/AKT1/MAP3K7/TGFB1/TRAF2/MAPK3/MAP2K7/TGFBR2/IL1A/MAP3K14	21	-0.654654
KEGG	hsa05142	Chagas disease	19/170	102/8164	1.85023e-13	1.03513e-12	4.15842e-13	FADD/TICAM1/CASP8/TNF/TNFRSF1A/TGFBR1/CHUK/FAS/IKBKB/TRAF6/RELA/IKBKG/CFLAR/MAPK1/AKT1/TGFB1/MAPK3/PPP2CA/TGFBR2	19	-2.06474
KEGG	hsa04714	Thermogenesis	27/170	232/8164	1.91908e-13	1.04539e-12	4.19965e-13	MAP3K5/UQCRH/UQCR11/COX7A2L/COX18/SDHB/UQCRC2/COX8A/COX4I1/COX11/UQCRHL/COX19/COX5A/COX7B/CYC1/UQCRC1/COX5B/COX6A1/UQCRFS1/COX7C/UQCRB/UQCR10/UQCRQ/NDUFA4/COX6B1/COX4I2/COX6C	27	4.04145
KEGG	hsa05130	Pathogenic Escherichia coli infection	25/170	197/8164	2.25456e-13	1.19665e-12	4.8073e-13	BAK1/CASP9/CASP7/FADD/CASP8/TNF/TNFRSF1A/TAB2/CHUK/FAS/IKBKB/TRAF6/RELA/IKBKG/TRADD/CASP3/TAB1/MAPK1/MAP3K7/RIPK1/TRAF2/MAPK3/CTTN/CYCS/BAX	25	-2.2
KEGG	hsa05212	Pancreatic cancer	16/170	76/8164	2.25437e-12	1.16664e-11	4.68672e-12	BAK1/CASP9/TGFBR1/BCL2L1/CHUK/IKBKB/RELA/IKBKG/BAD/MAPK1/AKT1/RAF1/TGFB1/MAPK3/TGFBR2/BAX	16	-1
KEGG	hsa05418	Fluid shear stress and atherosclerosis	20/170	139/8164	6.42628e-12	3.24449e-11	1.3034e-11	BCL2/MAP3K5/SQSTM1/TNF/TNFRSF1A/HSP90AA1/CHUK/IKBKB/RELA/IKBKG/SUMO1/BMPR2/AKT1/MAP3K7/BMPR1A/CAV1/MAP2K7/MMP9/IL1A/MMP2	20	-0.894427
KEGG	hsa04622	RIG-I-like receptor signaling pathway	15/170	70/8164	8.62042e-12	4.24863e-11	1.7068e-11	CASP10/FADD/DDX3X/CASP8/TNF/CHUK/IKBKB/TRAF6/RELA/IKBKG/TRADD/MAP3K7/RIPK1/TRAF2/TRAF3	15	-1.80739
KEGG	hsa05166	Human T-cell leukemia virus 1 infection	24/170	222/8164	2.35993e-11	1.13606e-10	4.56388e-11	SLC25A6/TNF/TNFRSF1A/TGFBR1/BCL2L1/CD40/CHUK/IKBKB/XIAP/RELA/IKBKG/VDAC3/PTEN/MAPK1/AKT1/SLC25A5/TGFB1/VDAC2/MAPK3/TGFBR2/VDAC1/BAX/MAP3K14/SLC25A4	24	-0.816497
KEGG	hsa05220	Chronic myeloid leukemia	15/170	76/8164	3.04601e-11	1.43301e-10	5.75682e-11	BAK1/TGFBR1/BCL2L1/CHUK/IKBKB/RELA/IKBKG/BAD/MAPK1/AKT1/RAF1/TGFB1/MAPK3/TGFBR2/BAX	15	-0.774597
KEGG	hsa04722	Neurotrophin signaling pathway	18/170	119/8164	3.2936e-11	1.51506e-10	6.08643e-11	BCL2/MAP3K5/IKBKB/TRAF6/RELA/PRKCD/BAD/ARHGDIA/MAPK1/AKT1/RAF1/RIPK2/MAGED1/NGF/MAPK3/FOXO3/MAP2K7/BAX	18	0
KEGG	hsa04010	MAPK signaling pathway	27/170	294/8164	5.47709e-11	2.46469e-10	9.90138e-11	MAP3K5/TNF/TNFRSF1A/TGFBR1/TAB2/CHUK/FAS/IKBKB/TRAF6/RELA/IKBKG/TRADD/HSPB1/CASP3/TAB1/MAPK1/AKT1/RAF1/MAP3K7/TGFB1/TRAF2/NGF/MAPK3/MAP2K7/TGFBR2/IL1A/MAP3K14	27	-0.96225
KEGG	hsa05215	Prostate cancer	16/170	97/8164	1.13097e-10	4.9811e-10	2.00105e-10	BCL2/CASP9/MMP3/HSP90AA1/CHUK/IKBKB/RELA/IKBKG/BAD/PTEN/MAPK1/AKT1/RAF1/MAPK3/MMP9/FOXO1	16	-1.5
KEGG	hsa04933	AGE-RAGE signaling pathway in diabetic complications	16/170	100/8164	1.8183e-10	7.84143e-10	3.15013e-10	BCL2/TNF/TGFBR1/RELA/PRKCD/CASP3/MAPK1/AKT1/TGFB1/MAPK3/TGFBR2/FOXO1/IL1A/BAX/FN1/MMP2	16	0.5
KEGG	hsa05210	Colorectal cancer	15/170	86/8164	1.95032e-10	8.23913e-10	3.3099e-10	BAK1/BCL2/CASP9/TGFBR1/BAD/CASP3/MAPK1/AKT1/RAF1/TGFB1/MAPK3/CYCS/BIRC5/TGFBR2/BAX	15	0.258199
KEGG	hsa05163	Human cytomegalovirus infection	23/170	225/8164	1.99923e-10	8.27682e-10	3.32504e-10	BAK1/CASP9/FADD/CASP8/TNF/TNFRSF1A/BID/CHUK/FAS/IKBKB/RELA/IKBKG/TRADD/CASP3/MAPK1/AKT1/RAF1/RIPK1/TRAF2/MAPK3/TRAF5/CYCS/BAX	23	-1.4596
KEGG	hsa04218	Cellular senescence	19/170	156/8164	4.30411e-10	1.74696e-09	7.01806e-10	SLC25A6/SQSTM1/TGFBR1/RELA/VDAC3/PTEN/MAPK1/AKT1/RAF1/SLC25A5/TGFB1/VDAC2/MAPK3/FOXO3/TGFBR2/FOXO1/IL1A/VDAC1/SLC25A4	19	1.14708
KEGG	hsa04120	Ubiquitin mediated proteolysis	18/170	142/8164	6.59405e-10	2.62494e-09	1.05451e-09	UBE2L6/UBE2D1/UBE2D3/UBB/STUB1/BIRC6/TRAF6/XIAP/UBE2G2/UBE2N/UBC/RPS27A/UBE2L3/UBE2G1/UBE2E2/UBA52/UBE2D2/BIRC3	18	-2.35702
KEGG	hsa05165	Human papillomavirus infection	27/170	331/8164	8.09006e-10	3.1597e-09	1.26934e-09	COMP/BAK1/FADD/TICAM1/CASP8/TNF/TNFRSF1A/CHUK/TLR3/FAS/IKBKB/RELA/IKBKG/BAD/TRADD/PTEN/CASP3/MAPK1/AKT1/RAF1/MAPK3/TRAF3/PPP2CA/FOXO1/BAX/FN1/TNC	27	-1.73205
KEGG	hsa05017	Spinocerebellar ataxia	17/170	143/8164	5.49926e-09	2.10805e-08	8.46864e-09	SLC25A6/MAP3K5/AMBRA1/VDAC3/ADRM1/AKT1/BECN1/SLC25A5/PPIF/TRAF2/VDAC2/ATXN3/PSMD4/CYCS/OPA1/VDAC1/SLC25A4	17	1.69775
KEGG	hsa04071	Sphingolipid signaling pathway	15/170	119/8164	2.04261e-08	7.58522e-08	3.0472e-08	BCL2/MAP3K5/TNF/TNFRSF1A/BID/RELA/TRADD/PTEN/MAPK1/AKT1/RAF1/TRAF2/MAPK3/PPP2CA/BAX	15	-0.774597
KEGG	hsa05135	Yersinia infection	16/170	137/8164	2.05204e-08	7.58522e-08	3.0472e-08	TICAM1/TNF/TAB2/CHUK/IKBKB/TRAF6/RELA/IKBKG/TAB1/MAPK1/AKT1/MAP3K7/TRAF2/MAPK3/MAP2K7/FN1	16	-1
KEGG	hsa05168	Herpes simplex virus 1 infection	31/170	495/8164	2.45626e-08	8.92009e-08	3.58346e-08	BAK1/BCL2/CASP9/FADD/TICAM1/CASP8/TNF/TNFRSF1A/BID/BCL2L1/TAB2/CHUK/TLR3/FAS/IKBKB/TRAF6/RELA/IKBKG/BAD/TRADD/CASP3/TAB1/AKT1/MAP3K7/TRAF2/APAF1/TRAF3/TRAF5/CYCS/BAX/BIRC3	31	-2.33487
KEGG	hsa04625	C-type lectin receptor signaling pathway	14/170	104/8164	2.63379e-08	9.24058e-08	3.71221e-08	BCL10/CASP8/TNF/CHUK/IKBKB/RELA/IKBKG/PRKCD/MAPK1/AKT1/RAF1/MAPK3/MALT1/MAP3K14	14	-1.06904
KEGG	hsa04660	T cell receptor signaling pathway	14/170	104/8164	2.63379e-08	9.24058e-08	3.71221e-08	BCL10/TNF/CHUK/IKBKB/RELA/IKBKG/MAPK1/AKT1/RAF1/MAP3K7/MAPK3/MAP2K7/MALT1/MAP3K14	14	0
KEGG	hsa04115	p53 signaling pathway	12/170	73/8164	2.75265e-08	9.49663e-08	3.81507e-08	BCL2/CASP9/CASP8/BID/BCL2L1/FAS/PTEN/CASP3/PIDD1/APAF1/CYCS/BAX	12	-1.1547
KEGG	hsa04140	Autophagy - animal	16/170	141/8164	3.108e-08	1.05468e-07	4.23696e-08	BCL2/SQSTM1/BCL2L1/TRAF6/AMBRA1/PRKCD/BAD/CFLAR/PTEN/MAPK1/AKT1/RAF1/BECN1/MAP3K7/MAPK3/PPP2CA	16	-1
KEGG	hsa05203	Viral carcinogenesis	18/170	204/8164	2.08772e-07	6.97031e-07	2.80017e-07	BAK1/DDX3X/CASP8/RELA/IKBKG/BAD/VDAC3/HDAC6/TRADD/CASP3/MAPK1/TRAF2/MAPK3/TRAF3/TRAF5/GSN/TRAF1/BAX	18	-0.942809
KEGG	hsa05213	Endometrial cancer	10/170	58/8164	2.5905e-07	8.51164e-07	3.41937e-07	BAK1/CASP9/BAD/PTEN/MAPK1/AKT1/RAF1/MAPK3/FOXO3/BAX	10	0
KEGG	hsa04350	TGF-beta signaling pathway	12/170	94/8164	4.89448e-07	1.58306e-06	6.35961e-07	TNF/TGFBR1/BMP2/BMPR2/SMAD7/MAPK1/TGFB1/BMPR1A/MAPK3/PPP2CA/TGFBR2/FMOD	12	0
KEGG	hsa04920	Adipocytokine signaling pathway	10/170	69/8164	1.38565e-06	4.41276e-06	1.77274e-06	TNF/TNFRSF1A/CHUK/IKBKB/RELA/IKBKG/TRADD/TNFRSF1B/AKT1/TRAF2	10	-1.89737
KEGG	hsa05235	PD-L1 expression and PD-1 checkpoint pathway in cancer	11/170	89/8164	2.06765e-06	6.48491e-06	2.60518e-06	TICAM1/CHUK/IKBKB/TRAF6/RELA/IKBKG/PTEN/MAPK1/AKT1/RAF1/MAPK3	11	-1.50756
KEGG	hsa05134	Legionellosis	9/170	57/8164	2.27167e-06	7.01846e-06	2.81952e-06	CASP9/CASP7/CASP8/TNF/VCP/RELA/CASP3/APAF1/CYCS	9	-1.66667
KEGG	hsa04141	Protein processing in endoplasmic reticulum	15/170	171/8164	2.44964e-06	7.45699e-06	2.99569e-06	BAK1/BCL2/MAP3K5/HSP90AA1/VCP/UBE2D1/UBE2D3/STUB1/UBE2G2/UBE2G1/TRAF2/ATXN3/MAP2K7/UBE2D2/BAX	15	-1.29099
KEGG	hsa04926	Relaxin signaling pathway	13/170	129/8164	2.52923e-06	7.5877e-06	3.0482e-06	MMP1/TGFBR1/RELA/MAPK1/AKT1/RAF1/TGFB1/MAPK3/MAP2K7/MMP9/TGFBR2/MMP13/MMP2	13	1.38675
KEGG	hsa04068	FoxO signaling pathway	13/170	131/8164	3.00919e-06	8.89859e-06	3.57482e-06	TGFBR1/CAT/CHUK/IKBKB/PTEN/MAPK1/AKT1/RAF1/TGFB1/MAPK3/FOXO3/TGFBR2/FOXO1	13	0.27735
KEGG	hsa05133	Pertussis	10/170	76/8164	3.43073e-06	1.00023e-05	4.0182e-06	CASP7/TICAM1/TNF/TRAF6/RELA/CASP3/MAPK1/MAPK3/NOD1/IL1A	10	-1.26491
KEGG	hsa05140	Leishmaniasis	10/170	77/8164	3.8727e-06	1.1134e-05	4.47286e-06	TNF/TAB2/TRAF6/RELA/TAB1/MAPK1/MAP3K7/TGFB1/MAPK3/IL1A	10	-0.632456
KEGG	hsa01521	EGFR tyrosine kinase inhibitor resistance	10/170	79/8164	4.90685e-06	1.39139e-05	5.58963e-06	BCL2/BCL2L1/BAD/PTEN/MAPK1/AKT1/RAF1/MAPK3/FOXO3/BAX	10	0
KEGG	hsa05171	Coronavirus disease - COVID-19	17/170	232/8164	6.08708e-06	1.70274e-05	6.84039e-06	MMP1/MMP3/TNF/TNFRSF1A/TAB2/CHUK/TLR3/IKBKB/TRAF6/RELA/IKBKG/RPS27A/MAPK1/MAP3K7/MAPK3/TRAF3/UBA52	17	-2.18282
KEGG	hsa04662	B cell receptor signaling pathway	10/170	82/8164	6.90469e-06	1.90569e-05	7.65572e-06	BCL10/CHUK/IKBKB/RELA/IKBKG/MAPK1/AKT1/RAF1/MAPK3/MALT1	10	-0.632456
KEGG	hsa05221	Acute myeloid leukemia	9/170	67/8164	9.0321e-06	2.46006e-05	9.88277e-06	CHUK/IKBKB/RELA/IKBKG/BAD/MAPK1/AKT1/RAF1/MAPK3	9	-1
KEGG	hsa05223	Non-small cell lung cancer	9/170	72/8164	1.64457e-05	4.42111e-05	1.77609e-05	BAK1/CASP9/BAD/MAPK1/AKT1/RAF1/MAPK3/FOXO3/BAX	9	0.333333
KEGG	hsa04613	Neutrophil extracellular trap formation	14/170	190/8164	3.9283e-05	0.000104251	4.18806e-05	SLC25A6/RELA/VDAC3/HDAC6/MAPK1/AKT1/RAF1/SLC25A5/MAP3K7/PPIF/VDAC2/MAPK3/VDAC1/SLC25A4	14	1.06904
KEGG	hsa04151	PI3K-Akt signaling pathway	20/170	354/8164	4.32724e-05	0.000113385	4.55499e-05	COMP/BCL2/CASP9/BCL2L1/HSP90AA1/CHUK/IKBKB/RELA/IKBKG/BAD/PTEN/MAPK1/AKT1/RAF1/NGF/MAPK3/PPP2CA/FOXO3/FN1/TNC	20	-0.894427
KEGG	hsa04659	Th17 cell differentiation	10/170	108/8164	7.84588e-05	0.000203012	8.15558e-05	TGFBR1/HSP90AA1/CHUK/IKBKB/RELA/IKBKG/MAPK1/TGFB1/MAPK3/TGFBR2	10	-1.26491
KEGG	hsa05205	Proteoglycans in cancer	14/170	205/8164	9.00446e-05	0.000230114	9.24434e-05	LUM/TNF/FAS/CASP3/MAPK1/AKT1/RAF1/TGFB1/MAPK3/CAV1/CTTN/MMP9/FN1/MMP2	14	1.06904
KEGG	hsa05218	Melanoma	8/170	72/8164	0.000115412	0.000291344	0.000117041	BAK1/BAD/PTEN/MAPK1/AKT1/RAF1/MAPK3/BAX	8	0
KEGG	hsa04022	cGMP-PKG signaling pathway	12/170	167/8164	0.00018026	0.000449563	0.000180603	SLC25A6/BAD/VDAC3/MAPK1/AKT1/RAF1/SLC25A5/PPIF/VDAC2/MAPK3/VDAC1/SLC25A4	12	1.1547
KEGG	hsa05219	Bladder cancer	6/170	41/8164	0.000183331	0.000451781	0.000181493	MMP1/MAPK1/RAF1/MAPK3/MMP9/MMP2	6	0.816497
KEGG	hsa05225	Hepatocellular carcinoma	12/170	168/8164	0.000190664	0.000460758	0.0001851	BAK1/TGFBR1/BCL2L1/BAD/PTEN/MAPK1/AKT1/RAF1/TGFB1/MAPK3/TGFBR2/BAX	12	0
KEGG	hsa01522	Endocrine resistance	9/170	98/8164	0.000191426	0.000460758	0.0001851	BCL2/BAD/MAPK1/AKT1/RAF1/MAPK3/MMP9/BAX/MMP2	9	1
KEGG	hsa04370	VEGF signaling pathway	7/170	59/8164	0.000205654	0.000489314	0.000196572	CASP9/BAD/HSPB1/MAPK1/AKT1/RAF1/MAPK3	7	-0.377964
KEGG	hsa05416	Viral myocarditis	7/170	60/8164	0.000228787	0.00053817	0.000216199	CASP9/CASP8/BID/CD40/CASP3/CAV1/CYCS	7	-1.13389
KEGG	hsa04510	Focal adhesion	13/170	201/8164	0.000276659	0.000643464	0.000258498	COMP/BCL2/XIAP/BAD/PTEN/MAPK1/AKT1/RAF1/MAPK3/CAV1/FN1/BIRC3/TNC	13	0.27735
KEGG	hsa01523	Antifolate resistance	5/170	30/8164	0.000344889	0.000793245	0.000318669	TNF/CHUK/IKBKB/RELA/IKBKG	5	-2.23607
KEGG	hsa04931	Insulin resistance	9/170	108/8164	0.000398387	0.000906221	0.000364055	TNF/TNFRSF1A/IKBKB/RELA/PRKCD/PTEN/AKT1/FOXO1/PPARGC1B	9	-1
KEGG	hsa05120	Epithelial cell signaling in Helicobacter pylori infection	7/170	70/8164	0.000596553	0.00134224	0.000539219	CHUK/IKBKB/RELA/IKBKG/CASP3/NOD1/MAP3K14	7	-1.13389
KEGG	hsa05214	Glioma	7/170	75/8164	0.000905429	0.00201531	0.000809609	BAK1/PTEN/MAPK1/AKT1/RAF1/MAPK3/BAX	7	0.377964
KEGG	hsa05226	Gastric cancer	10/170	149/8164	0.0010639	0.00234284	0.000941188	BAK1/BCL2/TGFBR1/MAPK1/AKT1/RAF1/TGFB1/MAPK3/TGFBR2/BAX	10	0.632456
KEGG	hsa04390	Hippo signaling pathway	10/170	157/8164	0.00158185	0.00344677	0.00138467	TGFBR1/BMP2/BMPR2/SMAD7/TGFB1/BMPR1A/PPP2CA/BIRC5/TGFBR2/BIRC3	10	0.632456
KEGG	hsa04623	Cytosolic DNA-sensing pathway	6/170	63/8164	0.00189969	0.00409621	0.00164557	RIPK3/CHUK/IKBKB/RELA/IKBKG/RIPK1	6	-1.63299
KEGG	hsa04062	Chemokine signaling pathway	11/170	192/8164	0.00218251	0.00465751	0.00187106	CHUK/IKBKB/RELA/IKBKG/PRKCD/BAD/MAPK1/AKT1/RAF1/MAPK3/FOXO3	11	-0.904534
KEGG	hsa05202	Transcriptional misregulation in cancer	11/170	193/8164	0.00227345	0.00479844	0.00192767	BAK1/MMP3/BCL2L1/CD40/RELA/MMP9/TGFBR2/TRAF1/FOXO1/BAX/BIRC3	11	0.301511
KEGG	hsa04915	Estrogen signaling pathway	9/170	138/8164	0.0022949	0.00479844	0.00192767	BCL2/HSP90AA1/PRKCD/MAPK1/AKT1/RAF1/MAPK3/MMP9/MMP2	9	0.333333
KEGG	hsa04930	Type II diabetes mellitus	5/170	46/8164	0.00253699	0.00525157	0.00210971	TNF/IKBKB/PRKCD/MAPK1/MAPK3	5	-1.34164
KEGG	hsa04664	Fc epsilon RI signaling pathway	6/170	68/8164	0.00280986	0.00575882	0.00231348	TNF/MAPK1/AKT1/RAF1/MAPK3/MAP2K7	6	0.816497
KEGG	hsa05211	Renal cell carcinoma	6/170	69/8164	0.00302543	0.00613985	0.00246656	BAD/MAPK1/AKT1/RAF1/TGFB1/MAPK3	6	0.816497
KEGG	hsa04917	Prolactin signaling pathway	6/170	70/8164	0.00325314	0.00653787	0.00262645	RELA/MAPK1/AKT1/RAF1/MAPK3/FOXO3	6	0.816497
KEGG	hsa04150	mTOR signaling pathway	9/170	156/8164	0.00519669	0.0103434	0.00415525	TNF/TNFRSF1A/CHUK/IKBKB/PTEN/MAPK1/AKT1/RAF1/MAPK3	9	-1
KEGG	hsa05216	Thyroid cancer	4/170	37/8164	0.00701597	0.0138315	0.00555651	BAK1/MAPK1/MAPK3/BAX	4	0
KEGG	hsa04012	ErbB signaling pathway	6/170	85/8164	0.00840948	0.0164223	0.00659731	BAD/MAPK1/AKT1/RAF1/MAPK3/MAP2K7	6	0.816497
KEGG	hsa04060	Cytokine-cytokine receptor interaction	13/170	295/8164	0.0085052	0.016454	0.00661005	TNF/TNFRSF1A/TGFBR1/CD40/BMP2/FAS/BMPR2/TNFRSF1B/TGFB1/BMPR1A/NGF/TGFBR2/IL1A	13	-0.83205
KEGG	hsa04014	Ras signaling pathway	11/170	235/8164	0.00989055	0.0189569	0.00761553	BCL2L1/CHUK/IKBKB/RELA/IKBKG/BAD/MAPK1/AKT1/RAF1/NGF/MAPK3	11	-0.904534
KEGG	hsa04211	Longevity regulating pathway	6/170	89/8164	0.0104419	0.01983	0.00796627	CAT/RELA/AKT1/FOXO3/FOXO1/BAX	6	0.816497
KEGG	hsa05321	Inflammatory bowel disease	5/170	65/8164	0.0111472	0.020977	0.00842707	TNF/RELA/NOD2/TGFB1/IL1A	5	-0.447214
KEGG	hsa04658	Th1 and Th2 cell differentiation	6/170	92/8164	0.0121793	0.0227128	0.00912439	CHUK/IKBKB/RELA/IKBKG/MAPK1/MAPK3	6	-1.63299
KEGG	hsa04912	GnRH signaling pathway	6/170	93/8164	0.0128012	0.023624	0.00949043	PRKCD/MAPK1/RAF1/MAPK3/MAP2K7/MMP2	6	0.816497
KEGG	hsa05207	Chemical carcinogenesis - receptor activation	10/170	212/8164	0.012993	0.023624	0.00949043	BCL2/HSP90AA1/XIAP/RELA/BAD/MAPK1/AKT1/RAF1/MAPK3/BIRC5	10	-0.632456
KEGG	hsa04919	Thyroid hormone signaling pathway	7/170	121/8164	0.0130103	0.023624	0.00949043	CASP9/BAD/MAPK1/AKT1/RAF1/MAPK3/FOXO1	7	0.377964
KEGG	hsa05230	Central carbon metabolism in cancer	5/170	70/8164	0.0150387	0.0270697	0.0108747	PTEN/MAPK1/AKT1/RAF1/MAPK3	5	0.447214
KEGG	hsa04666	Fc gamma R-mediated phagocytosis	6/170	97/8164	0.015512	0.0276809	0.0111202	PRKCD/MAPK1/AKT1/RAF1/MAPK3/GSN	6	0.816497
KEGG	hsa04520	Adherens junction	5/170	71/8164	0.0159134	0.0281544	0.0113105	TGFBR1/MAPK1/MAP3K7/MAPK3/TGFBR2	5	0.447214
KEGG	hsa04650	Natural killer cell mediated cytotoxicity	7/170	131/8164	0.0193756	0.0337988	0.0135779	TNF/BID/FAS/CASP3/MAPK1/RAF1/MAPK3	7	-1.13389
KEGG	hsa05146	Amoebiasis	6/170	102/8164	0.0194302	0.0337988	0.0135779	TNF/RELA/HSPB1/CASP3/TGFB1/FN1	6	-0.816497
KEGG	hsa05144	Malaria	4/170	50/8164	0.0198721	0.0342793	0.013771	COMP/TNF/CD40/TGFB1	4	-1
KEGG	hsa04910	Insulin signaling pathway	7/170	137/8164	0.0241011	0.0412309	0.0165636	IKBKB/BAD/MAPK1/AKT1/RAF1/MAPK3/FOXO1	7	0.377964
KEGG	hsa04371	Apelin signaling pathway	7/170	139/8164	0.0258386	0.0438408	0.0176121	TGFBR1/MAPK1/AKT1/RAF1/BECN1/MAPK3/NRF1	7	1.13389
KEGG	hsa05224	Breast cancer	7/170	147/8164	0.0336438	0.05662	0.0227459	BAK1/PTEN/MAPK1/AKT1/RAF1/MAPK3/BAX	7	0.377964
KEGG	hsa04730	Long-term depression	4/170	60/8164	0.0359066	0.0599408	0.02408	MAPK1/RAF1/MAPK3/PPP2CA	4	1
KEGG	hsa04213	Longevity regulating pathway - multiple species	4/170	62/8164	0.0398	0.0659088	0.0264775	CAT/AKT1/FOXO3/FOXO1	4	1
KEGG	hsa04929	GnRH secretion	4/170	64/8164	0.043925	0.0716313	0.0287764	MAPK1/AKT1/RAF1/MAPK3	4	1
KEGG	hsa05330	Allograft rejection	3/170	38/8164	0.0439654	0.0716313	0.0287764	TNF/CD40/FAS	3	-1.73205
KEGG	hsa05323	Rheumatoid arthritis	5/170	93/8164	0.0442937	0.0716313	0.0287764	MMP1/MMP3/TNF/TGFB1/IL1A	5	-0.447214
KEGG	hsa05332	Graft-versus-host disease	3/170	42/8164	0.0563703	0.0904547	0.0363383	TNF/FAS/IL1A	3	-0.57735
KEGG	hsa05206	MicroRNAs in cancer	11/170	310/8164	0.0586679	0.0934174	0.0375285	BAK1/BCL2/IKBKB/BMPR2/PTEN/CASP3/MAPK1/RAF1/MAPK3/MMP9/TNC	11	-0.904534
KEGG	hsa04940	Type I diabetes mellitus	3/170	43/8164	0.059705	0.0943431	0.0379003	TNF/FAS/IL1A	3	-0.57735
KEGG	hsa04914	Progesterone-mediated oocyte maturation	5/170	102/8164	0.0613357	0.0961856	0.0386405	HSP90AA1/MAPK1/AKT1/RAF1/MAPK3	5	0.447214

## Sheet: Analysis
ONTOLOGY	ID	Description	GeneRatio	BgRatio	pvalue	p.adjust	qvalue	geneID	Count	zscore
BP	GO:0097191	extrinsic apoptotic signaling pathway	38/198	221/18800	2.86556e-35	1.04564e-31	5.96339e-32	BAK1/BCL2/FADD/BCL10/DDX3X/CASP8/TNF/TNFRSF1A/BID/TGFBR1/BCL2L1/TLR3/FAS/BIRC6/RELA/HTRA2/BAD/PARK7/CFLAR/TRADD/RNF41/PTEN/TNFRSF1B/AKT1/RAF1/RIPK1/TGFB1/TRAF2/PIDD1/CRADD/NGF/CAV1/CTTN/FOXO3/CASP2/TRAF1/IL1A/BAX	38	-1.29777
BP	GO:2001233	regulation of apoptotic signaling pathway	45/198	370/18800	6.60885e-35	1.20579e-31	6.87668e-32	BCL2/SLC25A6/FADD/RIPK3/BCL10/DDX3X/TNF/BID/TGFBR1/BCL2L1/UBB/FAS/BIRC6/RELA/PRKCD/HTRA2/BAD/PARK7/CFLAR/HSPB1/PTEN/PINK1/AKT1/RAF1/BECN1/SLC25A5/PPIF/RIPK1/TRAF2/VDAC2/APAF1/MAGED1/CRADD/CAV1/CTTN/CASP2/MMP9/OPA1/FIS1/TRAF1/DNM1L/IL1A/BAX/PARL/SLC25A4	45	0.149071
BP	GO:0007249	I-kappaB kinase/NF-kappaB signaling	41/198	288/18800	1.35751e-34	1.65119e-31	9.41687e-32	CASP10/FADD/RIPK3/BCL10/SQSTM1/TICAM1/CASP8/TNF/TNFRSF1A/CD40/TAB2/CHUK/TLR3/IKBKB/TRAF6/RELA/IKBKG/UBE2N/CFLAR/TRADD/HSPB1/OTUD7B/NOD2/PINK1/AKT1/MAP3K7/RIPK1/TRAF2/RIPK2/PIDD1/OPTN/CARD8/TRAF3/NOD1/TRAF5/MALT1/SHARPIN/TRAF1/IL1A/MAP3K14/BIRC3	41	-1.09322
CC	GO:0070069	cytochrome complex	22/198	42/19594	1.63944e-33	5.06587e-31	3.84837e-31	UQCRH/UQCR11/COX7A2L/UQCRC2/COX8A/COX4I1/UQCRHL/COX5A/COX7B/CYC1/UQCRC1/COX5B/COX6A1/UQCRFS1/COX7C/UQCRB/UQCR10/UQCRQ/NDUFA4/COX6B1/COX4I2/COX6C	22	3.83761
CC	GO:0005741	mitochondrial outer membrane	32/198	205/19594	6.75127e-29	1.04307e-26	7.92386e-27	CYB5A/BAK1/BCL2/CASP8/BID/BCL2L1/PGAM5/UBB/AMBRA1/BAD/TOMM22/VDAC3/MFN2/RHOT2/UBC/RPS27A/PINK1/RAF1/VDAC2/RHOT1/TOMM20/FOXO3/UBA52/MFN1/OPA1/HAX1/FIS1/DNM1L/VDAC1/TOMM40/BAX/TOMM7	32	-0.353553
CC	GO:0031968	organelle outer membrane	33/198	232/19594	2.01931e-28	2.07989e-26	1.58002e-26	CYB5A/BAK1/BCL2/CASP8/BID/BCL2L1/PGAM5/UBB/AMBRA1/BAD/TOMM22/VDAC3/MFN2/RHOT2/UBC/RPS27A/PINK1/RAF1/VDAC2/LRPPRC/RHOT1/TOMM20/FOXO3/UBA52/MFN1/OPA1/HAX1/FIS1/DNM1L/VDAC1/TOMM40/BAX/TOMM7	33	-0.174078
MF	GO:0031625	ubiquitin protein ligase binding	44/196	298/18410	1.08642e-37	4.50864e-35	2.84756e-35	CASP10/BCL2/BCL10/UBE2L6/SQSTM1/CASP8/BID/HSP90AA1/CD40/VCP/UBE2D1/UBB/STUB1/FBXO7/TRAF6/AMBRA1/RELA/IKBKG/MFN2/SUMO1/UBE2N/HDAC6/UBC/SMAD7/RPS27A/TNFRSF1B/UBE2L3/PINK1/UBE2G1/BECN1/SLC25A5/RIPK1/TRAF2/LRPPRC/TRAF3/TRAF5/ATXN3/UBA52/SYT11/USP2/UQCRC1/TRAF1/FOXO1/DNM1L	44	-2.11058
MF	GO:0044389	ubiquitin-like protein ligase binding	44/196	317/18410	1.73994e-36	3.61037e-34	2.28023e-34	CASP10/BCL2/BCL10/UBE2L6/SQSTM1/CASP8/BID/HSP90AA1/CD40/VCP/UBE2D1/UBB/STUB1/FBXO7/TRAF6/AMBRA1/RELA/IKBKG/MFN2/SUMO1/UBE2N/HDAC6/UBC/SMAD7/RPS27A/TNFRSF1B/UBE2L3/PINK1/UBE2G1/BECN1/SLC25A5/RIPK1/TRAF2/LRPPRC/TRAF3/TRAF5/ATXN3/UBA52/SYT11/USP2/UQCRC1/TRAF1/FOXO1/DNM1L	44	-2.11058
MF	GO:0009055	electron transfer activity	22/196	125/18410	7.81705e-21	1.08136e-18	6.82963e-19	CYB5A/UQCRH/UQCR11/FDX1/SURF1/COX7A2L/SDHB/COX8A/COX4I1/COX11/COX5A/COX7B/CYC1/UQCRC1/COX5B/CYCS/COX6A1/UQCRFS1/UQCR10/NDUFA4/COX6B1/COX4I2	22	2.98481
KEGG	hsa05022	Pathways of neurodegeneration - multiple diseases	79/170	476/8164	3.01105e-53	6.23288e-51	2.50393e-51	BAK1/BCL2/CASP9/SLC25A6/CASP7/MAP3K5/FADD/UBE2L6/SQSTM1/CASP8/TNF/TNFRSF1A/BID/BCL2L1/CAT/VCP/UBB/FAS/UQCRH/UQCR11/AMBRA1/RELA/HTRA2/BAD/VDAC3/UBE2G2/MFN2/ADRM1/PARK7/UBC/RPS27A/TNFRSF1B/CASP3/UBE2L3/MAPK1/PINK1/UBE2G1/RAF1/BECN1/SLC25A5/PPIF/TARDBP/COX7A2L/TRAF2/OPTN/VDAC2/APAF1/SDHB/MAPK3/UQCRC2/ATXN3/UBA52/COX8A/MFN1/MAP2K7/COX4I1/PSMD4/UQCRHL/COX5A/COX7B/CYC1/UQCRC1/COX5B/CYCS/COX6A1/UQCRFS1/…	79	0.562544
KEGG	hsa05012	Parkinson disease	52/170	266/8164	2.27117e-37	2.35067e-35	9.44331e-36	CASP9/SLC25A6/MAP3K5/UBE2L6/BCL2L1/UBB/UQCRH/UQCR11/HTRA2/VDAC3/UBE2G2/MFN2/ADRM1/PARK7/UBC/RPS27A/CASP3/UBE2L3/PINK1/UBE2G1/SLC25A5/PPIF/COX7A2L/VDAC2/APAF1/SDHB/UQCRC2/UBA52/COX8A/MFN1/COX4I1/PSMD4/UQCRHL/COX5A/COX7B/CYC1/UQCRC1/COX5B/CYCS/COX6A1/UQCRFS1/COX7C/UQCRB/VDAC1/UQCR10/BAX/UQCRQ/NDUFA4/COX6B1/COX4I2/COX6C/SLC25A4	52	1.6641
KEGG	hsa04210	Apoptosis	40/170	136/8164	4.08666e-36	2.8198e-34	1.13279e-34	CASP10/BAK1/BCL2/CASP9/CASP7/MAP3K5/FADD/CASP8/TNF/TNFRSF1A/BID/BCL2L1/CHUK/FAS/IKBKB/XIAP/RELA/IKBKG/HTRA2/BAD/CFLAR/TRADD/CASP3/MAPK1/AKT1/RAF1/RIPK1/TRAF2/PIDD1/CASP6/APAF1/NGF/MAPK3/CASP2/CYCS/BIRC5/TRAF1/BAX/MAP3K14/BIRC3	40	-1.26491
