# Supplementary material for: HtrA3: a promising prognostic biomarker and therapeutic target for head and neck squamous cell carcinoma
Source: PeerJ journal article supplement (doi:10.7717/peerj.16237), 2023-10-10
Supplement: Ki67FAUD.zip [file Ki67FAUD.zip]

## Sheet: Sheet1
	Ki67				DAPI
	FADU				FADU				FADU				FADU
	Control	shNC	shHtrA3		Control	shNC	shHtrA3		Control	shNC	shHtrA3		Control	shNC	shHtrA3
	292	257	58		677	610	203		0.431315	0.421311	0.285714		43.1315	42.1311	28.5714
	275	241	64		611	509	238		0.450082	0.473477	0.268908		45.0082	47.3477	26.8908
	257	305	51		505	574	216		0.508911	0.531359	0.236111		50.8911	53.1359	23.6111
	CAL-27				CAL-27				CAL-27				CAL-27
	Control	shNC	shHtrA3		Control	shNC	shHtrA3		Control	shNC	shHtrA3		Control	shNC	shHtrA3
	309	239	53		555	532	214		0.556757	0.449248	0.247664		55.6757	44.9248	24.7664
	243	257	65		491	594	253		0.494908	0.43266	0.256917		49.4908	43.266	25.6917
	266	245	56		521	415	181		0.510557	0.590361	0.309392		51.0557	59.0361	30.9392
													FADU
													Control	shNC	shHtrA3
													43.1315	42.1311	28.5714
													45.0082	47.3477	26.8908
													50.8911	53.1359	23.6111
													CAL-27
													Control	shNC	shHtrA3
													55.6757	44.9248	24.7664
													49.4908	43.266	25.6917
													51.0557	59.0361	30.9392
