# Supplementary material for: HtrA3: a promising prognostic biomarker and therapeutic target for head and neck squamous cell carcinoma
Source: PeerJ journal article supplement (doi:10.7717/peerj.16237), 2023-10-10
Supplement: WB_Validation.zip [file WB_Validation.zip]

## Sheet: Results-HTRA1
	HTRA1	ACTIN
BEAS-2B	20409.2	16627.8	1.22742		Table Analyzed	Data 1
BEAS-2B	18393.3	17715.7	1.03825
BEAS-2B	16744.7	15423.7	1.08565		Column B	FaDu
FADU	12348.8	18772.3	0.657822		vs.	vs.
FADU	11522.8	18001.9	0.64009		Column A	BEAS-2B
FADU	11988.3	16049.9	0.746936
					Unpaired t test
					P value	0.0027
					P value summary	**
					Significantly different (P < 0.05)?	Yes
					One- or two-tailed P value?	Two-tailed
					t, df	t=6.624, df=4
					How big is the difference?
					Mean of column A	1.117
					Mean of column B	0.6816
					Difference between means (B - A) ± SEM	-0.4355 ± 0.06574
					95% confidence interval	-0.6180 to -0.2530
					R squared (eta squared)	0.9165
					F test to compare variances
					F, DFn, Dfd	2.955, 2, 2
					P value	0.5057
					P value summary	ns
					Significantly different (P < 0.05)?	No
					Data analyzed
					Sample size, column A	3
					Sample size, column B	3
